# Supplementary material for: Microevolutionary dynamics of eccDNA in Chinese hamster ovary cells grown in fed-batch cultures under control and lactate-stressed conditions
Source: Sci Rep. 2023 Jan 21;13:1200. doi: 10.1038/s41598-023-27962-0 (PMC9862248; doi:10.1038/s41598-023-27962-0)
Supplement: Supplementary file 2 — Supplementary Tables. [file 41598_2023_27962_MOESM2_ESM.xlsx]

## Sheet: S1
Table S1: Origins of Replication Data Base. Mammalian origin of replication sequences retrieved from NCBI to identify eccDNAs capable of autonomous replication.
>X05915.1 D. yakuba mitochondrial DNA for origin of replication, small ribosomal RNA, transfer RNAs tRNA-fMet, tRNA-Gln, tRNA-Ile and tRNA-Val
>X05914.1 D. virilis mitochondrial DNA for origin of replication, small mitochondrial ribosomal RNA, transfer tRNAs tRNA-fMet, tRNA-Gln and tRNA-Ile
>V00143.1 C. aethiops sequence showing some similarity to SV40 origin of replication
>L20424.1 Mus musculus origin of replication in the adenosine deaminase gene region
>M26222.1 African green monkey origin of replication (ORS9) region
>M26221.1 African green monkey origin of replication (ORS8) region
>M26220.1 African green monkey origin of replication (ORS4) region
>M26219.1 African green monkey origin of replication (ORS3) region
>M26218.1 African green monkey origin of replication (ORS1) region
>M26225.1 African green monkey origin of replication (ORS12) region
>M26224.1 African green monkey origin of replication (ORS11) region
>M26223.1 African green monkey origin of replication (ORS10) region
>X52034.1 C. griseus dhfr origin of replication
>X16884.1 A.forbesii mitochondrial DNA for putative origin of replication
>X16887.1 P.ochraceus mitochondrial DNA for putative origin of replication
>X16883.1 Starfish mitochondrial DNA for putative origin of replication
>X16882.1 Starfish mitochondrial DNA for putative origin of replication
>K01448.1 Mouse rRNA origin of replication
>M11239.1 Monkey origin of replication
>NG_046672.1 Homo sapiens origin of replication at HBB (LOC107133510) on chromosome 11
>NG_046334.2 Homo sapiens origin of replication upstream of MCM4 (LOC106903146) on chromosome 8
>NG_046768.1 Mus musculus origin of replication downstream of immunoglobulin heavy chain (Igh) locus (LOC107325940) on chromosome 12
>NG_046167.1 Homo sapiens origin of replication adjacent to lamin B2 (LOC106804547) on chromosome 19
>NG_046346.1 Homo sapiens origin of replication upstream of FMR1 (LOC107048982) on chromosome X
>NG_046340.1 Homo sapiens origin of replication in 5' region of FMR1 (LOC107032825) on chromosome X
>NG_046816.1 Mus musculus origin of replication in ribosomal DNA intergenic spacer (LOC107403166) on chromosome 17
>NG_046741.2 Homo sapiens origin of replication S14 (LOC107228383) on chromosome 8
>NG_046729.1 Homo sapiens origin of replication 20mer2 (LOC107198089) on chromosome 19
>NG_046728.1 Homo sapiens origin of replication 20mer1 (LOC107198088) on chromosome 19
>NG_046762.1 Mus musculus origin of replication 3' to Hoxb1 (LOC107305679) on chromosome 11
>NG_046761.1 Mus musculus origin of replication in Il13 (LOC107305670) on chromosome 11
>NG_046736.1 Mus musculus origin of replication in Tsix (LOC107228251) on chromosome X
>NG_046735.1 Mus musculus origin of replication in exon 1 of Xist (LOC107228250) on chromosome X
>NG_046724.1 Mus musculus origin of replication upstream of Myc (LOC107197956) on chromosome 15
>NG_046723.1 Mus musculus origin of replication near adenosine deaminase (LOC107197955) on chromosome 2
>NG_046738.1 Homo sapiens origin of replication 343 (ORI343) on chromosome 6
>NG_046721.1 Homo sapiens origin of replication ori6 (ORI6) on chromosome 12
>NG_046739.1 Homo sapiens origin of replication NOA3 (NOA3) on chromosome 22
>NG_046806.1 Homo sapiens origin of replication in ribosomal DNA intergenic spacer (LOC107403080) on chromosome 21
>NG_046767.1 Homo sapiens origin of replication at fragile site FRA3B (LOC107325936) on chromosome 3
>NG_046745.1 Homo sapiens origin of replication in OSBP2 (LOC107275225) on chromosome 22
>NG_046744.1 Homo sapiens origin of replication in TBC1D10A (LOC107275224) on chromosome 22
>NG_046743.1 Homo sapiens origin of replication in RNF185 (LOC107275221) on chromosome 22
>NG_046740.1 Homo sapiens origin of replication S3 (LOC107228318) on chromosome 2
>NG_046727.1 Homo sapiens origin of replication downstream of CSF2 (LOC107198087) on chromosome 5
>NG_046714.1 Homo sapiens origin of replication in promoter of G6PD (LOC107181288) on chromosome X
>NG_046713.1 Homo sapiens origin of replication for ATXN10 repeat region (LOC107181287) on chromosome 22
>NG_046387.1 Homo sapiens origin of replication in DNMT1 (LOC107080555) on chromosome 19
>NG_046380.1 Homo sapiens origin of replication in promoter of TOP1 (LOC107080552) on chromosome 20
>NG_046372.1 Homo sapiens origin of replication in DMPK trinucleotide repeat region (LOC107075317) on chromosome 19
>NG_046363.1 Homo sapiens origin of replication in promoter of HSPA1A (LOC107063610) on chromosome 6
>NG_046351.1 Homo sapiens origin of replication in promoter of DBF4 (LOC107057645) on chromosome 7
>NG_046348.1 Homo sapiens origin of replication in 5' region of AFF2/FMR2 (LOC107048984) on chromosome X
>NG_046339.1 Homo sapiens origin of replication in promoter/intron 1 of HPRT1 (LOC107032760) on chromosome X
>NG_046332.1 Homo sapiens origin of replication upstream of MYC (LOC106867047) on chromosome 8
>X92688.1 P.maximus mitochondrial 5.5kb fragment encoding genes flanking putative origin of replication
>AY225408.1 Rhynchosciara americana puff origin of replication, genomic sequence
>DQ230978.1 Homo sapiens late activated chromosomal origin of replication sequence
>XM_045329549.1 PREDICTED: Mercenaria mercenaria origin of replication complex subunit 2-like (LOC123543480), mRNA
>XM_045329462.1 PREDICTED: Mercenaria mercenaria origin of replication complex subunit 5-like (LOC123543391), mRNA
>XM_044892690.1 PREDICTED: Coccinella septempunctata origin of replication complex subunit 1A-like (LOC123309529), mRNA
>XM_041712498.1 PREDICTED: Taeniopygia guttata origin of replication complex subunit 1-like (LOC121468635), mRNA
>XM_033397732.1 PREDICTED: Drosophila miranda origin of replication complex subunit 3-like (LOC117193013), mRNA
>DW022881.1 PMAD-aac06g01.g1 Lamprey_WGS_pCMV-sport6 Petromyzon marinus cDNA 5' similar to ref|NP_006181.1| origin recognition complex, subunit 2-like; origin of replication 2 (Saccharomyces homolog)-like; origin recognition complex, subunit 2 (yeast homolog)-like [Homo sapiens] _sp, mRNA sequence
>M13046.1 X.laevis mitochondrial origin of replication region containing the D-loop, Phe-tRNA, Pro-tRNA, 12S rRNA genes
>V00711.1 Mus musculus mitochondrial genome
>K01786.1 African green monkey SV40 homologue replication origin
>K01787.1 African green monkey SV40 homologue replication origin
>X57081.1 R.norvegicus DNA for mitochondrial D-loop nascent strand-like region (clone pJCF9.1)
>X57080.1 R.norvegicus DNA for mitochondrial D-loop nascent strand-like region (clone pDP3.4)
>X62249.1 M.musculus scRNA
>L16849.1 Jalmenus evagoras evagoras mitochondrial D-loop DNA, transfer RNA-Met gene, and 12S ribosomal RNA gene, 5' end
>NC_060943.1 Homo sapiens isolate CHM13 chromosome 19, alternate assembly T2T-CHM13v2.0
>NC_060946.1 Homo sapiens isolate CHM13 chromosome 22, alternate assembly T2T-CHM13v2.0
>NC_060947.1 Homo sapiens isolate CHM13 chromosome X, alternate assembly T2T-CHM13v2.0
>NC_000019.10 Homo sapiens chromosome 19, GRCh38.p14 Primary Assembly
>NC_000022.11 Homo sapiens chromosome 22, GRCh38.p14 Primary Assembly
>NC_000023.11 Homo sapiens chromosome X, GRCh38.p14 Primary Assembly
>Y18134.1 Squalus acanthia complete mitochondrial genome
>Y16067.1 Scyliorhinus canicula complete mitochondrial genome
>Z80942.1 Alectoris graeca mitochondrial D-loop control region and partial tRNA-Glu, tRNA-Phe genes
>Y08555.1 Alectoris rufa mitochondrial D-loop control region and partial tRNA-Glu, tRNA-Phe genes
>Y08556.1 Alectoris barbara mitochondrial D-loop control region and partial tRNA-Glu, tRNA-Phe genes
>X68659.1 S.alpinus mitochondrial DNA of D-loop region
>X93347.1 Gorilla gorilla gorilla mitochondrial DNA. complete genome
>M10546.1 Human mitochondrial DNA, fragment M1, encoding transfer RNAs, cytochrome oxidase I, and 2 URFs
>V00662.1 H.sapiens mitochondrial genome
>L16850.1 Strymon melinus mitochondrial D-loop DNA and transfer RNA-Met gene, 5' end
>Y18001.1 Papio hamadryas mitochondrial DNA, complete genome
>X93335.1 Pan troglodytes mitochondrial DNA, complete genome (isolate Jenny)
>X93334.1 Homo sapiens mitochondrial DNA, complete genome
>X14848.1 Rattus norvegicus mitochondrial genome
>X63726.1 Phoca vitulina mitochondrial DNA, complete genome
>V00654.1 Bos taurus complete mitochondrial genome
>X04985.1 Human plasmid stimulating X chromosomal sequence Xrep
>X14168.1 Human pLC46 with DNA replication origin
>X59848.1 Mouse plasmid LFII-Ori region
>Y09885.1 C.griseus DNA fragment 16 kb downstream of DHFR gene
>X94372.1 C.griseus DNA fragment 17 kb downstream of DHFR gene
>X00301.1 Human ARS2 sequence, an autonomously repeating sequence with a replication sequence RS and a replication enhancer RE; RS is essential for high frequency transformation while RE is essential for maximum functioning of RS
>X00300.1 Human ARS1 sequence, an autonomously replicating sequence with a replication sequence RS and a replication enhancer RE; RS is essential for high frequency transformation while RE is essential for maximum functioning of RS
>X12651.1 Human p53-dependent origin for DNA replication
>X13184.1 Human c-myc gene ARS region (2 kb upstream coding region)
>X72965.1 C.hircus mitochondrial genome
>X05609.1 Monkey mitochondrial DNA origin region with transfer RNA
>K01719.1 Mouse nuclear matrix DNA G5
>K01718.1 Mouse nuclear matrix DNA G4 containing tandem repeats
>J01437.1 Rat mt heavy strand subfragment with 5' end of replicating segment
>K02485.1 Human mt heavy-strand replication origin on light-strand
>J01072.1 d. melanogaster autonomous replication sequence (ars) 414
>J01071.1 d. melanogaster autonomous replication sequence (ars) 413
>J01070.1 d. melanogaster autonomous replication sequence (ars) 410
>J01069.1 d. melanogaster autonomous replication sequence (ars) 406
>J01068.1 d. melanogaster autonomous replication sequence (ars) 312
>NC_060932.1 Homo sapiens isolate CHM13 chromosome 8, alternate assembly T2T-CHM13v2.0
>NC_060935.1 Homo sapiens isolate CHM13 chromosome 11, alternate assembly T2T-CHM13v2.0
>NC_000008.11 Homo sapiens chromosome 8, GRCh38.p14 Primary Assembly
>NC_000011.10 Homo sapiens chromosome 11, GRCh38.p14 Primary Assembly

## Sheet: S2
Table S2: eccDNA-relevant genes. Curated genes from the literature linked to eccDNA in humans.
Gene Symbol	Entrez Gene ID
ABCB1	5243
ABL1	25
ACACA	31
ACLY	47
ACSS2	55902
ACVR1	90
ADAM12	8038
AGRN	375790
AICDA	57379
AKR1C2	1646
AKT1	207
ALB	213
ALK	238
AMY1A	276
ANG	283
APEX1	328
APOBEC3A	200315
APOBEC3B	9582
APOL1	8542
ARID1A	8289
ASCL1	429
ASPG	374569
ASRGL1	80150
ATM	472
ATR	545
ATRX	546
ATXN2	6311
AURKB	9212
B2M	567
BANF1	8815
BCL3	602
BCOR	54880
BCR	613
BIRC3	330
BLM	641
BRAF	673
BRCA1	672
BRCA2	675
BRD2	6046
BRD4	23476
BTG1	694
C4orf3	401152
C9orf72	203228
CACNA1A	773
CALCA	796
CAPZA2	830
CASP3	836
CBLC	23624
CCND1	595
CCNE1	898
CD1A	909
CD9	928
CD63	967
CD81	975
CD274	29126
CDH1	999
CDH23	64072
CDK4	1019
CDK6	1021
CDK12	51755
CDKN1A	1026
CDKN2A	1029
CEACAM5	1048
CENPA	1058
CEP76	79959
CERT1	10087
CGAS	115004
CHD4	1108
CLTCL1	8218
CNBD1	168975
CNTNAP2	26047
COL11A2	1302
COX5B	1329
COX8A	1351
CREB5	9586
CTC1	80169
CTCF	10664
CTLA4	1493
CTNNB1	1499
CTXN2	399697
CUL1	8454
CUX1	1523
CXCL1	2919
CYC1	1537
DAB1	1600
DAPK1	1612
DAZ4	57135
DCLK1	9201
DDX11	1663
DEK	7913
DENND3	22898
DFFA	1676
DFFB	1677
DHFR	1719
DHODH	1723
DHX9	1660
DICER1	23405
DKK1	22943
DNA2	1763
DNAH14	127602
DTNA	1837
EBF1	1879
EBNA1BP2	10969
EEF1A1	1915
EEF1AKMT3	25895
EFNB2	1948
EGF	1950
EGFR	1956
EIF1AX	1964
EIF5A	1984
EIF5A2	56648
EME1	146956
ENO1	2023
EPAS1	2034
EPCAM	4072
ERBB2	2064
ERBB3	2065
ERCC1	2067
ERCC2	2068
ERCC4	2072
ERVK-8	619465
ERVK-9	100616102
ERVK-10	100616101
ERVK-25	100862683
EXO1	9156
EXO5	64789
F2R	2149
FABP2	2169
FABP4	2167
FAN1	22909
FASN	2194
FBXW7	55294
FGF2	2247
FGF20	26281
FGFR1	2260
FGFR2	2263
FGFR3	2261
FH	2271
FN1	2335
FOLH1	2346
FOXA1	3169
FOXG1	2290
FOXO1	2308
FUS	2521
GAPDH	2597
GATA3	2625
GFUS	7264
GLP1R	2740
GNA11	2767
GNAQ	2776
GNAS	2778
GPC5	2262
GREB1	9687
GRIN2D	2906
GSE1	23199
GTF2I	2969
GZMA	3001
H1-5	3009
H2AC18	8337
H2AX	3014
H3-3A	3020
H3C2	8358
H6PD	9563
HAND2	9464
HDAC1	3065
HHEX	3087
HIF1A	3091
HIP1	3092
HK1	3098
HMGA2	8091
HMGCR	3156
HSP90AA1	3320
HSPA4	3308
HSPA8	3312
IDH1	3417
IDH2	3418
IFNG	3458
IGF2	3481
IRF1	3659
IRF3	3661
IRF4	3662
IRS4	8471
ISL1	3670
KCNQ1OT1	10984
KEAP1	9817
KIF15	56992
KIR2DL4	3805
KIT	3815
KLF5	688
KRAS	3845
KRT18	3875
KRT19	3880
LAMB1	3912
LDHA	3939
LDLR	3949
LIG1	3978
LIG4	3981
LRP4	4038
MACF1	23499
MAP1LC3B	81631
MAP2K1	5604
MAP2K7	5609
MAPK1	5594
MAPK3	5595
MDM2	4193
ME1	4199
ME2	4200
ME3	10873
MECOM	2122
MECP2	4204
MET	4233
METTL1	4234
METTL14	57721
MGMT	4255
MIR21	406991
MIR126	406913
MIR145	406937
MIR146B	574447
MIR191	406966
MIR222	407007
MLH1	4292
MMP2	4313
MRAP	56246
MRE11	4361
MRGPRF	116535
MSH2	4436
MSH3	4437
MSH6	2956
MSX2	4488
MT-CO1	4512
MTAP	4507
MTOR	2475
MTX1	4580
MUC1	4582
MUC2	4583
MUC6	4588
MUC16	94025
MUC17	140453
MUS81	80198
MYC	4609
MYCN	4613
MYD88	4615
MYH14	79784
MYH15	22989
MYOZ2	51778
NBN	4683
NCOA2	10499
NEK1	4750
NF1	4763
NFE2L2	4780
NFKB1	4790
NIPSNAP2	2631
NME1	4830
NOTCH2	4853
NPM1	4869
NRAS	4893
NSUN6	221078
NT5DC1	221294
NTF3	4908
NUCB1	4924
NUMA1	4926
NUP62	23636
NUP153	9972
ODC1	4953
OGDH	4967
PAEP	5047
PALB2	79728
PARP1	142
PAX3	5077
PAX7	5081
PAX8	7849
PCAT1	100750225
PCBP1	5093
PCMTD1	115294
PDGFRA	5156
PDGFRB	5159
PDP1	54704
PHOX2B	8929
PIK3CA	5290
PIK3CG	5294
PIK3R2	5296
PKM	5315
PLXNB2	23654
PMS1	5378
PMS2	5395
PNKP	11284
POLA1	5422
POLI	11201
POLQ	10721
POLR2H	5437
POLR3A	11128
POLR3F	10621
POT1	25913
POTEF	728378
PPARG	5468
PPP2R1A	5518
PRAMEF14	729528
PRF1	5551
PRKAA2	5563
PRKDC	5591
PRMT5	10419
PRPF31	26121
PRRC2B	84726
PSG4	5672
PSG5	5673
PSG9	5678
PSG10P	653492
PTEN	5728
PTP4A2	8073
PTPN11	5781
PTPRC	5788
PVT1	5820
PYCR3	65263
RAB3B	5865
RAC1	5879
RAD21	5885
RAD50	10111
RAD51	5888
RAD51C	5889
RAD52	5893
RAD54L	8438
RAF1	5894
RARA	5914
RB1	5925
RBBP8	5932
RECQL	5965
RELA	5970
RET	5979
RFTN1	23180
RHOA	387
RICTOR	253260
RNASE1	6035
RNU6-1	26827
ROR2	4920
RTCA	8634
RTEL1	51750
RXRA	6256
SARS1	6301
SDHA	6389
SDHAF2	54949
SDHB	6390
SDHC	6391
SDHD	6392
SEC24D	9871
SEC61G	23480
SEPTIN14	346288
SERF1A	8293
SERF2	10169
SERINC3	10955
SERTAD1	29950
SETBP1	26040
SETX	23064
SF1	7536
SF3B1	23451
SGK1	6446
SIGLEC9	27180
SIRT1	23411
SKP2	6502
SLC1A5	6510
SLC2A1	6513
SLC5A8	160728
SLC7A11	23657
SLC12A8	84561
SLC16A1	6566
SLC26A4	5172
SLC39A4	55630
SLTM	79811
SMAD4	4089
SMARCA4	6597
SMARCB1	6598
SMARCE1	6605
SMC3	9126
SOD1	6647
SOS1	6654
SOX2	6657
SOX9	6662
SOX10	6663
SOX11	6664
SOX17	64321
SP8	221833
SPINK1	6690
SPOP	8405
SQLE	6713
SREBF1	6720
STAT6	6778
STK31	56164
STK38	11329
STN1	79991
SYNPO2	171024
TAL2	6887
TARDBP	23435
TBC1D9	23158
TBC1D15	64786
TBX2	6909
TCAF1	9747
TCAF2	285966
TEAD4	7004
TEN1	100134934
TENT5D	169966
TERF2	7014
TERT	7015
TES	26136
TESC-AS1	101928244
TG	7038
TGFA	7039
TGFB1	7040
TIMP3	7078
TLR9	54106
TNF	7124
TNFRSF9	3604
TOPBP1	11073
TP53	7157
TP53BP1	7158
TPR	7175
TREX1	11277
TTN	7273
TTN-AS1	100506866
TWIST2	117581
TXK	7294
U2AF1	7307
UNCX	340260
USP13	8975
USP53	54532
WRN	7486
XPO1	7514
XRCC1	7515
XRCC3	7517
XRCC4	7518
XRCC6	2547
ZFHX3	463
ZHX2	22882

## Sheet: S3
Table S3: Human-CHO ortholog assignments. 1-to-1 Human-Chinese hamster orthologs obtained from NCBI
Human Entrez Gene ID	Chinese Hamster Entrez Gene ID
13	100771815
14	100775009
15	100755392
16	100766178
18	100765485
19	100761226
20	100772799
21	100770749
22	100766714
23	100765933
25	100768098
27	100772469
28	100772592
29	100762348
31	100762904
32	100753124
33	100759026
34	100763159
35	100774097
36	100766828
37	100767527
38	100770936
40	100762972
41	100751471
43	100770679
47	100773325
48	100766024
49	100754856
50	100759203
51	100689199
52	100773599
53	100756404
54	100768228
55	100763644
56	100752850
58	100768972
59	100758575
60	100689477
70	100766388
71	113830633
72	100768744
81	100766890
86	100757342
87	100755831
88	100765161
89	100756672
90	100758565
91	100764812
92	100774605
93	100755103
94	100764896
97	100755378
98	100758982
100	100756254
101	100770949
102	100772891
103	100760578
104	100755658
105	100759087
107	100764561
108	100773811
109	100770498
111	100765958
112	100768368
113	100756132
115	100751372
116	100760233
117	100772260
118	100768168
119	100753858
123	100756213
128	100767929
131	100759210
132	100736551
133	100760129
134	100751346
135	100762652
136	100759954
140	100755732
141	100761196
142	100689463
143	100765231
146	100772819
147	103160164
148	100758859
150	100768369
151	100757384
152	103161652
154	100758902
155	100775030
156	100762552
158	100689060
159	100767083
160	100772481
161	100755406
162	100752826
163	100750609
164	100755260
165	100762528
166	100769877
167	100756652
173	100757632
174	100768980
175	100754017
176	100764201
177	100757624
178	100772306
181	100762653
182	100750525
183	100773858
185	100750798
186	113830710
187	100759527
189	100771278
190	100754328
191	100750969
196	100682538
197	100765165
199	100764184
202	100774444
203	100759346
204	100756723
205	100755987
207	100769460
208	100768351
210	100752314
211	100766370
212	100753315
213	100768954
214	100774312
215	100769988
217	100772225
219	100765516
220	100768227
222	100763332
223	100758951
225	100758232
226	100771717
229	100755179
230	100760749
231	100751272
238	100760366
239	100764620
240	100772492
241	100760744
242	100761707
246	100764916
247	100754473
249	100771587
257	100770020
258	100773253
259	100750686
262	100774596
267	100762626
268	100759997
269	100772657
270	100757901
271	100774910
272	100758386
273	100767913
274	100772852
275	100763091
283	100755402
284	113839205
285	100756240
286	100754018
287	100757830
288	100767295
290	100751632
291	100751779
292	100769087
301	100768079
302	100760539
306	100762572
307	100771507
308	100759361
309	100759027
310	100763423
311	100752736
313	100768833
314	100762635
318	100769146
319	100775063
320	100774931
321	100763312
322	100760848
323	100755787
324	100750563
325	100772827
326	100768045
327	100761732
328	100689281
329	100756596
331	100689374
332	118237651
333	100773034
334	100758329
335	100772590
336	100768641
337	100774995
338	100762698
339	100760326
341	103159291
343	100762692
344	100774395
345	100774705
346	100774105
347	100774049
348	100773810
350	100762364
351	100689222
353	100765665
355	100762537
356	100773293
357	100751470
358	100773231
359	100773344
360	100758981
361	100770342
362	100773918
363	100750886
364	100760137
366	100772598
367	100752675
368	100752070
369	100751432
372	100758971
373	100761294
374	100772017
375	100757864
377	100766631
378	100769922
381	100759676
382	100774654
383	100750727
384	100760459
387	100762797
388	100774759
389	100774717
390	100755904
391	100761011
392	100754369
393	100775066
394	100765474
395	100763825
396	100767064
397	100753905
398	100757877
399	100768495
400	100751351
402	100760039
403	100757638
405	100752106
406	100755141
407	100770938
408	100754574
410	100754567
411	100759794
415	100773060
417	100759929
419	100771336
420	100757103
421	100773799
427	100771068
429	100772145
430	100762061
433	100768020
434	100750676
435	100756687
439	100761936
440	100760225
443	100767695
444	100755768
445	100762274
460	100753322
462	100750462
463	100759927
466	100773050
467	100763246
468	100689386
471	100750895
473	100770191
474	100769461
475	100760386
476	100771378
477	100763478
478	100758209
479	100765522
480	100763191
481	100760718
482	100757379
483	100765669
486	100771061
487	100763714
488	100751820
489	100756356
490	100764066
491	100759670
492	100753233
493	100764868
495	100767384
496	100750430
498	100770431
501	100756509
506	100763024
513	100766108
514	103162776
515	100774535
516	100752739
517	100772366
518	100754380
521	100766302
522	100756936
523	100768315
525	100756094
526	100774665
527	100772184
528	100773930
529	100755187
533	100754687
534	100765359
535	100756648
537	100760638
538	100689242
539	100770018
540	100770719
545	100766256
546	100767383
547	100770614
549	100774025
550	100760920
552	100756428
553	100757693
554	100768840
558	100772486
563	100773168
567	100689409
570	100756252
571	100770017
572	100760426
573	100759550
575	100766156
576	100774076
577	100753086
578	100689368
579	100768166
580	100750589
581	100689032
582	100767595
583	100756643
585	100755264
586	100763658
587	100752344
590	100767789
593	100774234
594	100774277
595	100689063
596	100774873
597	100758620
598	100689371
599	118237609
602	100751077
604	100773755
605	100753895
607	100751238
608	100753580
610	100751563
611	100751225
613	100768252
617	100771607
622	100774340
623	100759905
624	100759615
627	100768664
629	100758781
631	100772902
632	100763202
633	100771022
635	100754488
636	100762966
637	100754606
638	100768268
639	100759446
640	100755534
641	100762862
642	100754419
643	100770604
644	100751522
645	100768929
646	100768562
649	100751120
650	100752564
651	100766849
652	100754303
653	100763439
654	100768517
655	100759897
657	100750332
659	100764519
660	100751568
661	100767520
662	100770337
663	100750620
664	100774634
665	100759633
666	100773011
667	100773919
669	100757548
670	100761605
671	100759574
672	100770724
673	100771486
675	100689197
676	100768519
677	100759015
678	103160773
680	100763382
682	100689246
683	100773468
684	100689092
685	100763277
686	100755324
687	100771438
688	100774271
689	100756079
694	100755272
695	100772144
696	100760393
699	100772514
705	100765734
706	100768847
708	100754945
710	100756452
712	100766409
713	100766700
714	100769576
715	100768476
716	100759777
717	100759069
718	100763958
719	100771140
720	100767983
722	100772713
725	100773000
726	100768370
728	100766822
729	100766699
730	100769002
731	100774244
732	100773949
733	100763555
734	100752524
735	100774096
738	100767235
740	100765777
741	100766069
744	100765784
745	100756693
747	100756392
752	100765726
753	100758578
754	100756425
755	100761839
757	100757829
758	100769889
759	100772227
760	100774844
761	100774549
762	100760390
763	100755419
765	100754196
766	100769849
767	100765172
768	100756257
770	100750594
771	100772435
773	100758171
774	100770495
775	100754788
776	100772497
777	100773594
778	100757994
779	100765508
780	100762536
781	100764769
782	100757399
783	100774766
784	100768080
785	100765888
786	100766592
788	100765000
790	100689232
793	100751076
794	100754392
795	100758675
799	100765683
800	100763421
801	100771772
805	100765281
808	100762749
810	100766751
811	100689096
813	100750933
814	100774010
815	100765253
816	100769205
818	100763272
819	100769365
820	100767672
821	100689345
822	100774775
823	100758636
824	100771239
825	100758723
826	100770160
827	100773921
828	100759707
829	100750522
830	100753621
831	100761152
832	100755876
833	100761418
835	100689445
836	100689061
837	100759746
839	100766458
840	100766857
841	100689369
842	100689370
844	100762901
845	100752020
846	100766791
847	100773774
857	100753021
858	100751645
859	100773488
860	100753922
861	100758283
862	100768348
863	100764900
864	100758568
865	100765267
866	100766333
867	100754737
868	100774600
869	100760568
871	100689327
874	100689021
875	100762141
881	100757067
883	100769821
885	100772438
886	100774917
887	100754060
889	100758813
890	100759649
891	100770842
892	100764362
894	100771544
896	100766025
898	100753358
899	100774506
900	100771963
901	100753075
902	100762144
904	100758059
905	100764441
908	100754913
914	100769473
915	100756906
916	100757488
917	100757196
919	100771291
920	100766761
921	100764231
922	100759713
923	100751977
924	100751416
925	100766512
926	100769972
928	100764427
929	100757057
930	100765953
932	100765384
933	100752625
939	100751906
940	100769830
941	100760030
942	100769382
944	100753833
947	100771922
948	100765055
949	100736552
950	100771629
951	100771511
952	100773187
953	100762593
954	100771642
955	100765414
956	100772668
957	100751454
958	100770242
959	100763089
960	100750640
961	100770433
962	100753914
963	100772300
966	100772910
967	100772167
968	100762586
971	100756547
972	100766126
973	100759072
974	100770248
975	100759632
976	100761362
977	100754541
978	100754972
983	100766716
987	100762923
988	100756825
989	100773521
990	100689243
991	100767761
993	100767961
994	100765509
995	100773417
996	100770539
997	100750683
998	100765433
999	100758185
1000	100689204
1001	100758473
1002	103160107
1003	100767079
1005	100764852
1006	100758353
1007	100758572
1009	100767551
1010	100756950
1012	100751312
1013	100764305
1014	100761107
1015	100761958
1016	100751447
1017	100689039
1018	100759733
1019	100760122
1020	100762907
1021	100764515
1022	100769780
1024	100759285
1025	100757719
1026	103160601
1027	100689401
1028	103164177
1031	100774733
1032	100758546
1033	100752216
1036	100760315
1038	100769322
1039	100765677
1040	100761973
1041	100761666
1045	100762482
1046	100764476
1047	100773546
1052	100771036
1053	100770450
1054	100770190
1056	100771549
1058	100689459
1059	100689274
1060	100761015
1062	100771167
1063	100752075
1066	100761459
1069	100768482
1070	100765724
1071	100758852
1072	100760435
1073	100757641
1075	100769144
1080	100754506
1081	100689452
1101	100758456
1102	100750578
1103	100756785
1104	100769945
1105	100751866
1106	100756099
1107	100755630
1108	100754178
1111	100751099
1112	100768709
1113	100766424
1114	100773273
1116	100760271
1118	100750757
1119	100767436
1120	100770695
1121	100763141
1122	100772631
1123	100755161
1124	100757437
1128	100755522
1129	100770997
1130	100768280
1131	100753955
1132	100752496
1133	100773423
1134	100755935
1135	100757795
1136	100763280
1137	100760001
1138	100762991
1140	100758816
1141	100761068
1142	100774746
1143	100763565
1144	100763831
1145	100769735
1146	100764120
1147	100754432
1149	100763404
1152	100774847
1153	100689075
1154	100774955
1155	100770447
1158	100754895
1159	100754659
1160	100752172
1161	100755229
1163	100774870
1164	100760104
1173	100773058
1174	100759417
1175	100764194
1176	100770551
1180	100751277
1181	100769999
1182	100759588
1183	100762547
1184	100754025
1185	100774640
1186	100773701
1191	100756447
1192	100761384
1195	100758582
1196	100755756
1198	100756143
1200	100759190
1201	100754370
1203	100763877
1207	100768284
1208	100760027
1209	100752525
1211	100758987
1212	100767928
1213	100756644
1232	100762154
1233	100770515
1235	100756572
1236	100773169
1237	100753346
1238	100766393
1240	100760709
1241	100769281
1244	100689220
1258	103159708
1259	100768599
1260	100771809
1261	100771361
1262	100753462
1263	100762491
1264	100753310
1265	100754225
1266	100773931
1267	100753220
1268	100768005
1269	100752745
1270	100774933
1271	100753725
1277	100759814
1278	100766269
1280	100755037
1281	100753589
1282	100757740
1284	107976999
1285	103158667
1291	100755078
1292	100754390
1293	100771857
1294	100689027
1295	100755279
1296	100758166
1297	100755811
1298	100753027
1299	100757317
1300	100750863
1301	100768858
1302	100766812
1303	100752735
1305	100769753
1306	100772437
1307	100768792
1308	100766261
1310	100755518
1311	100766091
1312	100770626
1314	100762124
1315	100774203
1316	100750724
1317	100689094
1318	100754404
1325	103161317
1326	100759538
1327	100770670
1329	100768321
1337	100764001
1339	100757101
1340	100766809
1345	100753143
1347	100756540
1349	100764866
1350	103158861
1351	100755207
1352	100764018
1353	100763079
1355	100751499
1356	100753849
1357	100757667
1358	100756609
1359	100751382
1360	100751091
1361	100754304
1362	100757331
1363	100757401
1366	100766949
1368	100770407
1369	100752048
1370	100770664
1371	100772187
1373	100760467
1374	100762166
1375	100770034
1376	100766757
1379	100772783
1380	100773072
1381	100755827
1382	100753208
1384	100762198
1385	100761582
1386	100754663
1388	100767112
1389	100772731
1390	100767867
1393	100757291
1395	100774100
1396	100754628
1397	100771081
1398	100762827
1399	100752014
1400	113830864
1401	100772240
1404	100766601
1406	100770134
1407	100761664
1408	100774356
1409	100762633
1410	100772623
1411	107977665
1412	100769887
1413	100772464
1414	100772171
1415	100759533
1417	100759827
1427	100765744
1428	100771156
1429	100768247
1431	100750580
1432	100689104
1434	100756434
1435	100767142
1436	100763221
1437	100765221
1439	100764512
1440	100755744
1441	100760185
1445	100755922
1447	100755914
1448	100752988
1452	100758298
1453	100751124
1455	100758847
1456	100773714
1457	100759365
1459	100763424
1460	100763034
1462	100766891
1463	100766384
1464	100760376
1465	100756325
1466	100764077
1468	100766192
1474	100764786
1475	100767084
1476	100768687
1477	100761066
1478	100770425
1479	100772127
1486	103162615
1487	100766703
1488	100769412
1490	100750810
1491	100752127
1493	100765782
1495	100754399
1496	100766706
1497	100764451
1499	100773307
1500	100753529
1501	100752408
1503	100689101
1506	100756444
1508	100756995
1509	100766628
1510	100757212
1512	100756691
1513	100765407
1519	100767833
1520	100751823
1521	100767305
1522	100689392
1523	100767555
1524	100753050
1525	100755073
1527	100772753
1528	100774522
1534	100772551
1535	100766833
1536	100760802
1537	100766032
1538	100755781
1539	100763548
1540	100758070
1545	100759241
1571	100765891
1581	100689275
1582	100770995
1583	100752606
1586	100758683
1588	100769024
1589	100767691
1591	100751280
1592	100755549
1593	100751584
1594	100760414
1595	100762189
1600	100773659
1601	100774674
1602	100760786
1603	100767387
1604	100772131
1605	100762216
1606	100769779
1607	100753343
1608	100757224
1609	100771387
1610	100689280
1612	100766355
1613	100773624
1615	100767438
1616	100774618
1618	100771380
1620	100774741
1621	100761411
1622	100761641
1627	100763853
1628	100775076
1630	100758377
1632	100774222
1633	100751299
1634	100756152
1635	100751791
1636	103158533
1638	100764118
1639	100765083
1641	100773444
1642	100764133
1643	100756705
1644	100761742
1647	103159266
1649	100763514
1650	100755259
1652	100765163
1653	100756637
1654	100764307
1655	100768812
1656	100759836
1657	100773136
1660	100765632
1662	100752733
1663	100756953
1665	100764898
1666	100753128
1672	103161655
1674	100764990
1675	100763302
1676	100762210
1677	100768492
1678	103159709
1687	100757679
1690	100765512
1716	100769222
1717	100771700
1718	100769920
1719	100689028
1723	100756632
1725	100755665
1727	100773531
1728	100760905
1729	100752938
1731	100771948
1733	100765192
1734	100774757
1735	100753739
1736	100755395
1737	100773493
1738	100689437
1739	100774630
1740	100752752
1741	100770281
1742	100762874
1743	100758466
1745	100768966
1746	100769245
1747	100758183
1748	100757892
1749	100766793
1755	100763251
1756	100774409
1757	100761121
1758	100773494
1759	100753867
1760	103164072
1761	100757765
1762	100757796
1763	100761842
1767	100771964
1768	100754128
1769	100763108
1770	100770690
1773	100764185
1774	100689095
1776	100769677
1777	100763100
1778	100771366
1780	100765135
1781	100773761
1783	100770140
1785	100771373
1786	100762713
1787	100773025
1788	100771064
1791	100755735
1794	100766266
1795	100768911
1796	100760042
1797	100768556
1798	100689054
1800	100762968
1801	100765648
1802	100689365
1803	100768361
1804	100774564
1805	100765812
1806	100765169
1807	100752636
1808	100759148
1809	100755197
1810	100765234
1811	100757051
1812	100760963
1813	100751925
1814	100769070
1815	100751093
1816	100752680
1819	100771930
1820	100764162
1821	100771867
1822	100767627
1823	100762663
1824	100762954
1826	100765236
1827	100689474
1830	100761782
1831	100760120
1832	100767947
1833	100754407
1834	100754381
1836	100762932
1837	100761929
1838	100756605
1839	100689423
1840	100772295
1841	100755252
1842	100754893
1843	100769474
1844	100757670
1845	100761077
1846	100756233
1847	100758694
1848	100764365
1849	100765417
1850	100768862
1852	100752633
1854	100761578
1855	100770288
1856	100762587
1857	100773535
1859	100764478
1861	100770400
1869	100758556
1870	100754522
1871	100754647
1874	100765561
1875	103160151
1876	100767557
1879	100763962
1880	103161487
1889	100765950
1890	100757152
1891	100768055
1892	100754654
1893	100763376
1894	100754674
1896	100768945
1901	100689198
1902	100757522
1903	100689182
1906	100768493
1907	100754793
1908	100772506
1909	100774176
1910	100762726
1911	100759454
1912	100756136
1915	100689276
1917	100760295
1933	100753925
1936	100755894
1937	100753545
1938	100689051
1939	100759038
1942	100758074
1943	100755670
1944	100773125
1945	113833115
1946	100756587
1947	100755216
1948	100753573
1949	100756800
1950	100763146
1951	100766515
1952	100751011
1953	100769242
1954	100755592
1955	100764388
1956	100774580
1958	100755852
1959	100770422
1960	100751698
1962	100754698
1964	100750661
1965	100761915
1967	100770460
1968	100769010
1969	100752851
1973	100762873
1974	100763323
1975	100758911
1977	100773768
1978	100769654
1979	100768613
1981	100770567
1982	100758677
1983	100756911
1984	100766364
1990	100750829
1991	100752732
1992	100756986
1993	100771799
1994	100754131
1995	100768802
1996	100773765
1997	100751907
1998	100762906
1999	100754961
2000	100771659
2001	100774069
2002	100763890
2004	100689475
2005	100755459
2009	100770154
2010	100760344
2011	100769644
2012	100753041
2013	100767430
2014	100751496
2015	100751559
2016	100768849
2017	100772651
2018	100750961
2020	100773986
2021	100770499
2022	100757433
2026	100758414
2027	100771169
2028	100757489
2029	100764533
2033	100762260
2034	100771160
2035	100767741
2036	100751805
2037	100756569
2038	100768600
2039	100764907
2040	100753652
2041	100752024
2042	100768107
2043	100754542
2044	100770099
2045	100750730
2046	100769287
2047	100769764
2048	100766993
2049	100774807
2050	100769535
2051	100762813
2052	100750792
2053	100757328
2054	100768784
2055	100757767
2056	100753960
2057	100769376
2058	100774338
2059	100750968
2060	100751122
2063	103163676
2064	100759983
2065	100767681
2066	100757865
2067	100689377
2068	100689272
2069	100771728
2070	100754333
2071	100689367
2072	100689044
2073	100764306
2074	100770299
2078	100764178
2079	100758434
2081	100750680
2091	100765730
2098	100774799
2099	100768474
2100	100763291
2101	100761304
2103	100760486
2104	100760533
2107	100755265
2108	100758144
2109	100753078
2110	100763190
2113	100767456
2114	100774407
2115	100758498
2117	100750397
2118	100774750
2119	100756646
2120	100771873
2121	100771932
2122	100768628
2123	100761225
2124	100760937
2125	100760021
2128	100763300
2130	100773033
2131	100689334
2132	100751585
2134	100770000
2135	100761218
2137	100751999
2138	100772860
2139	100768991
2140	100772330
2145	100760595
2146	100758055
2147	100754947
2149	100758351
2150	100757860
2151	100758642
2152	100765608
2153	100761588
2155	100759052
2157	107977029
2158	100757213
2159	100758763
2160	100768163
2161	100764143
2162	100761709
2165	100764268
2166	100771171
2167	100760812
2168	100769104
2169	100754164
2170	100761139
2171	100762553
2172	100767370
2173	100752143
2175	100761220
2176	118237590
2177	100757761
2178	100765848
2180	100751492
2181	100752583
2182	100760496
2184	100757944
2185	100758086
2186	100772838
2187	100750774
2188	103161842
2189	100689273
2191	100767303
2192	100757176
2193	100763673
2194	100689207
2195	100766718
2196	100766386
2197	100689400
2199	100763343
2200	100761283
2201	100769316
2202	100750809
2204	118239355
2205	100756823
2206	100765095
2207	100768356
2208	100769597
2209	100774550
2217	100755637
2218	100761516
2222	100689192
2224	100754883
2230	100751853
2232	100773278
2235	100764152
2237	100756103
2239	100768625
2241	100755838
2242	100763153
2243	100770138
2244	100770424
2245	100760862
2246	100764257
2247	100757429
2248	100757734
2249	100758023
2250	100763237
2251	100772115
2252	100761599
2253	100750999
2254	100759509
2255	100751051
2256	100759104
2257	100770589
2258	100756051
2259	100762042
2260	100773586
2261	100764560
2262	100768469
2263	100763455
2264	100765320
2266	100769847
2267	100771647
2268	100758687
2271	100773218
2272	100755382
2273	100763662
2274	100762607
2275	100751268
2277	100773421
2280	100763474
2281	100763278
2286	100757160
2287	100757543
2288	100762395
2289	100760904
2290	100762710
2294	100757169
2295	100760156
2299	100767484
2302	100755106
2305	100769341
2307	100755669
2308	100768647
2309	100770315
2313	100765706
2314	100756205
2315	100762259
2316	100760050
2317	100769967
2318	100751994
2319	100766445
2321	100761329
2322	100761902
2323	100773162
2324	100766609
2326	100750993
2327	100753345
2329	100753048
2330	100750494
2331	100765932
2332	100760305
2334	100756662
2335	100751189
2339	100752295
2342	100752221
2348	100689330
2353	100689418
2354	100755767
2355	100755919
2356	100689022
2357	100758056
2395	100755339
2444	100751157
2475	100755421
2483	100770784
2487	100757779
2488	100689453
2491	100771572
2492	100769953
2494	100766752
2495	100689102
2512	100753846
2515	100756746
2516	100772192
2517	100752441
2519	100756134
2520	100772161
2521	100756868
2523	100757047
2524	100751185
2526	100754814
2529	100772214
2530	100751648
2531	100774578
2532	100757110
2533	100774387
2534	100772355
2535	100763109
2538	100763214
2539	100689469
2542	100758396
2547	100770214
2548	100755105
2549	100753832
2550	100770643
2551	100756649
2553	100753587
2554	100765947
2555	100771532
2557	100755113
2558	100764074
2559	100765459
2560	100754246
2563	100756568
2564	100755410
2565	100756681
2566	100768164
2567	100764373
2568	100766614
2569	100769153
2570	100769438
2571	100765882
2572	100757642
2580	100766883
2581	100751905
2582	113830648
2583	100764682
2584	100757135
2585	100752083
2587	113830711
2588	100753973
2589	100763868
2590	100767525
2591	100753226
2592	100752522
2593	100755964
2595	100770033
2596	100751655
2597	100736557
2617	100751073
2618	100689446
2620	100764664
2621	100751777
2622	100752777
2623	100763974
2624	100762331
2625	100760238
2626	100756123
2627	103161469
2628	100771783
2629	100756635
2631	100756369
2632	100772279
2636	100769092
2637	100768672
2638	100763450
2639	100757019
2641	100767021
2642	100766482
2643	100750667
2645	100763110
2646	100763556
2647	100772750
2648	100774478
2649	100773066
2650	100767124
2652	100768262
2653	100765652
2658	100772200
2660	100770972
2661	100756618
2662	100758802
2664	100760927
2665	100765873
2668	100773138
2669	100757029
2670	100758767
2671	100767463
2672	100769674
2674	100760143
2675	100763728
2676	100752308
2677	100774482
2678	100763802
2681	100754535
2683	100689430
2686	100752303
2687	100764088
2688	100770534
2690	100763540
2691	100756401
2692	100772938
2693	100755255
2694	100756309
2695	100753817
2700	100762422
2701	100689037
2702	100751822
2703	100752105
2705	100754733
2706	100762125
2707	100765420
2709	100764845
2710	100753140
2712	100770084
2717	100752709
2719	100768919
2720	100767446
2729	100752019
2730	100750530
2731	100762555
2733	100767037
2734	100689240
2735	100763229
2736	100757572
2737	100762738
2739	100764266
2740	100763400
2741	100761438
2742	100751068
2743	100764841
2744	100689202
2745	100757688
2746	100759948
2752	100764163
2760	100759507
2762	100689436
2764	100754009
2765	103158701
2766	100765304
2767	100689065
2768	100760944
2769	100761285
2770	100689070
2771	100689068
2773	100689072
2774	100760304
2775	100689069
2779	100689190
2780	100772380
2781	100767381
2782	100689442
2783	100756281
2784	100756790
2785	100755432
2786	100767992
2787	100757206
2788	100765832
2790	100755995
2791	100761038
2792	100760746
2793	100754408
2794	100757330
2796	100774729
2798	100758518
2799	100770659
2800	100751002
2801	100754167
2802	100771774
2803	100754180
2804	100764942
2805	100762297
2806	100762838
2810	100769890
2811	100770316
2812	118239889
2813	100767123
2814	100770950
2815	100767667
2817	100751141
2819	100772179
2820	100766128
2821	100689468
2822	100759513
2823	100767618
2824	100765850
2825	100757115
2826	100760302
2827	100759546
2829	100761002
2830	100772414
2832	107977929
2833	100769241
2834	103162285
2835	100764513
2837	100772706
2838	103159450
2840	103163592
2841	100764954
2842	100750479
2843	100772615
2844	100770264
2845	100753963
2846	100752179
2848	100766966
2850	103162514
2852	100767871
2853	100773323
2856	100752683
2857	100764606
2859	100770330
2861	100758560
2863	100759577
2867	103161441
2868	100767022
2869	100771151
2870	103161260
2872	100769766
2873	100770684
2874	100766072
2875	100760506
2876	100771188
2877	100751356
2878	100764638
2879	100765235
2880	100766810
2882	100756109
2885	100769627
2886	100760569
2887	100760784
2888	100752932
2889	100764804
2890	100769392
2891	100764344
2893	100755681
2894	100760535
2895	100769746
2896	100756647
2897	100770303
2898	100754248
2899	100755668
2900	100767895
2901	100757915
2902	100770880
2903	100764315
2904	118239276
2905	100758804
2906	100750615
2907	100753055
2908	100763961
2909	100752481
2911	100751598
2912	100772929
2913	100760036
2914	100757229
2917	100774073
2918	100758817
2922	100769410
2923	100689343
2925	100758098
2926	100751594
2928	103160525
2931	100757049
2932	100760865
2934	100753350
2935	100753280
2936	100757970
2937	100753200
2947	100750357
2954	100764455
2956	100771087
2957	100750765
2958	100750331
2959	100754725
2960	100763009
2961	100754209
2962	100762222
2963	100768332
2965	100751383
2967	100768069
2968	103160241
2969	100771695
2971	100763921
2972	100753600
2975	100763706
2976	100766655
2977	100769238
2978	100766612
2979	100766902
2980	100755664
2981	100758844
2982	100768699
2983	100772822
2984	100757969
2987	100770439
2990	100757362
2992	100751671
2995	100773140
2997	100769788
2998	100770628
3000	100754759
3003	100774132
3004	100764748
3005	100752547
3009	100760013
3010	100752306
3014	100757539
3018	100753502
3020	100753137
3021	100757430
3024	100754977
3026	100774748
3028	100757689
3029	100765715
3030	100757947
3032	100758239
3033	100761491
3034	100753802
3035	100757635
3037	100751055
3038	100757895
3046	100768374
3050	100758314
3052	100763541
3053	100751445
3054	100774489
3055	100773315
3059	100764646
3060	100754701
3061	100773491
3062	100762569
3064	100764729
3065	100752721
3066	100764557
3067	100753889
3068	100761454
3069	100772142
3070	100754676
3071	100770185
3073	100750552
3075	100768853
3077	100762132
3081	100762426
3082	100764472
3083	100765604
3084	100757907
3087	100751343
3090	100767977
3091	100751293
3092	100757209
3093	100764110
3094	100764340
3096	100768788
3097	100760180
3098	100765413
3099	100772205
3101	100765901
3104	100759359
3108	100760794
3109	100761082
3110	100751599
3111	100760208
3113	100759913
3122	100767639
3131	100759113
3140	100753615
3141	100752840
3142	100756486
3145	100757819
3146	100754755
3148	100762338
3149	100772377
3155	100755385
3156	100756363
3157	100762235
3158	100774684
3159	100689040
3161	100772538
3162	100756872
3163	100773727
3164	100764218
3167	100768285
3169	100755899
3170	100772660
3171	113839315
3172	100770083
3174	100751997
3175	100765766
3177	100761966
3178	100769923
3181	100759302
3182	100767538
3183	100751290
3184	100767887
3185	100771400
3187	100769493
3188	100773216
3189	100756529
3190	100762670
3191	100768344
3192	100767942
3195	100751022
3198	100759424
3199	100761561
3200	100761845
3202	100762428
3203	100764757
3204	100759709
3205	100759995
3207	100763010
3208	100750673
3211	100751249
3212	100750955
3213	100750662
3214	100750374
3215	100774854
3216	100774559
3217	100774273
3221	103158598
3222	100763415
3223	100763696
3224	100770928
3225	100763984
3226	100764281
3227	100771213
3228	100771504
3229	103159695
3232	100757961
3233	107979126
3234	100758537
3235	100758825
3236	100752695
3238	100752995
3239	100753293
3241	100752247
3242	100768220
3248	100755116
3249	100757163
3251	100769768
3257	100761713
3263	100753194
3265	100773737
3266	100763405
3267	100757749
3268	100755409
3269	100760663
3270	100771220
3273	100764582
3274	100760378
3275	100752416
3276	100765197
3280	100752756
3281	100751023
3290	100762502
3291	100766725
3292	100750866
3293	100767644
3294	100751897
3295	103161104
3297	100762942
3299	100758969
3300	100773438
3301	100689381
3303	100760510
3306	100764750
3308	100764628
3309	100689305
3312	100689472
3313	100689405
3315	100763481
3316	100772331
3320	100689397
3321	100769189
3329	100689473
3337	100753924
3338	100756870
3339	100689041
3340	100766710
3344	100768700
3350	100753851
3351	100689321
3352	100767570
3355	100766950
3356	100689471
3357	103161688
3358	100754331
3359	100763929
3360	100763863
3361	100772532
3362	100752934
3363	103163243
3364	100754140
3371	100754133
3373	100752718
3375	100771196
3376	100754316
3381	100752803
3382	100759520
3383	100689428
3384	100750973
3386	100761834
3394	100770390
3396	100757939
3397	100774183
3398	100769110
3399	100751577
3416	100763752
3417	100758958
3418	103158535
3419	100754480
3420	100771661
3421	100751753
3422	100752366
3423	100763345
3425	100767663
3426	100767614
3430	100770156
3433	100763118
3437	100763410
3454	100768581
3456	103160615
3458	100768486
3459	100772793
3460	100768877
3475	100772061
3476	100768558
3479	100751642
3480	100768531
3481	100762359
3482	100762916
3483	100753202
3484	100763682
3485	100757494
3486	100764858
3487	100772587
3488	100754876
3489	100751810
3490	100757355
3491	100766753
3508	100754637
3512	100774033
3516	100774626
3547	100768646
3549	100774896
[truncated: 13,585 more rows]

## Sheet: S4
Table S4: Day 0 tRNA. Full details of transfer RNA annotation.
Sequence	Number of tRNA	tRNA Start	tRNA End	tRNA Type	Anticodon	Intron Begin	Intron End	Score
m64111_201213_171552_75368429_ccs	1	2334	2262	Asn	ATT	0	0	-31.14
m64111_201213_171552_75433618_ccs	1	3140	3068	Ser	GCT	0	0	-24.79
m64111_201213_171552_75499038_ccs	1	1219	1290	Ser	GCT	0	0	-29.63
m64111_201213_171552_75563374_ccs	1	243	171	Ser	GCT	0	0	-28.26
m64111_201213_171552_75564478_ccs	1	231	364	Cys	ACA	0	0	-31.07
m64111_201213_171552_75694314_ccs0	1	919	991	Ser	GCT	0	0	-28.25
m64111_201213_171552_75826948_ccs0	1	154	226	Ser	GCT	0	0	-28.82
m64111_201213_171552_75891983_ccs0	1	991	1063	Ser	GCT	0	0	-28.26
m64111_201213_171552_75956806_ccs	1	4919	4848	Ala	AGC	0	0	-23.7
m64111_201213_171552_75956806_ccs	2	789	717	Lys	CTT	0	0	-30.75
m64111_201213_171552_76284822_ccs	1	14057	13985	Ser	GCT	0	0	-28.26
m64111_201213_171552_76284832_ccs	1	1573	1645	Ser	GCT	0	0	-25.04
m64111_201213_171552_76677248_ccs0	1	559	631	Lys	CTT	0	0	-25.71
m64111_201213_171552_76677949_ccs	1	4060	3988	Ser	GCT	0	0	-29.42
m64111_201213_171552_76679693_ccs0	1	137	209	Ser	GCT	0	0	-24.57
m64111_201213_171552_76808733_ccs	1	5133	5061	Lys	CTT	0	0	-22.87
m64111_201213_171552_76939774_ccs	1	5787	5717	Gln	TTG	0	0	-29.06
m64111_201213_171552_77071044_ccs	1	2686	2756	Gly	TCC	0	0	-28.26
m64111_201213_171552_77071044_ccs	2	3693	3621	Lys	CTT	0	0	-28.87
m64111_201213_171552_77138098_ccs	1	5922	5995	Ser	GCT	0	0	-23.03
m64111_201213_171552_77138098_ccs	2	6614	6686	Asn	GTT	0	0	-31.13
m64111_201213_171552_77138098_ccs	3	9521	9449	Asn	GTT	0	0	-28.26
m64111_201213_171552_77138098_ccs	4	7562	7490	Ser	GCT	0	0	-31.53
m64111_201213_171552_77202408_ccs	1	919	850	Ile	AAT	0	0	-26.42
m64111_201213_171552_77268785_ccs0	1	191	119	Ser	GCT	0	0	-23.7
m64111_201213_171552_77334433_ccs	1	5302	5374	Ser	GCT	0	0	-31.02
m64111_201213_171552_77399073_ccs	1	3193	3265	Ser	GCT	0	0	-28.3
m64111_201213_171552_78119849_ccs	1	1511	1583	Asn	GTT	0	0	-28.26
m64111_201213_171552_78119849_ccs	2	2663	2735	Ser	GCT	0	0	-27.77
m64111_201213_171552_78187075_ccs	1	1098	1026	Ile	GAT	0	0	-30.33
m64111_201213_171552_78381247_ccs	1	5008	5080	Asp	ATC	0	0	-30.26
m64111_201213_171552_78448956_ccs	1	1925	1997	Ser	GCT	0	0	-28.26
m64111_201213_171552_78579662_ccs	1	1851	1923	Asp	ATC	0	0	-28.26
m64111_201213_171552_78643652_ccs	1	4464	4535	Ser	GCT	0	0	-31
m64111_201213_171552_78710255_ccs	1	6367	6439	Asn	GTT	0	0	-30.22
m64111_201213_171552_2556822_ccs	1	5233	5162	Ser	ACT	0	0	-29.22
m64111_201213_171552_2622929_ccs	1	5968	6039	Asn	ATT	0	0	-30.32
m64111_201213_171552_2689169_ccs	1	1957	2029	Ser	GCT	0	0	-28.26
m64111_201213_171552_2689169_ccs	2	201	131	Gly	TCC	0	0	-22.66
m64111_201213_171552_79168445_ccs	1	252	181	Cys	ACA	0	0	-30.66
m64111_201213_171552_79365435_ccs	1	2420	2491	Ser	GCT	0	0	-24.74
m64111_201213_171552_79889759_ccs	1	2072	2142	Gln	TTG	0	0	-29.06
m64111_201213_171552_79889759_ccs	2	6668	6738	Ser	TGA	0	0	-29.73
m64111_201213_171552_79890503_ccs	1	849	777	Asn	ATT	0	0	-22.4
m64111_201213_171552_79955542_ccs	1	950	1022	Ser	GCT	0	0	-28.26
m64111_201213_171552_79955542_ccs	2	2341	2270	Ala	AGC	0	0	-28.27
m64111_201213_171552_79956164_ccs	1	2878	2806	Ser	GCT	0	0	-29.28
m64111_201213_171552_80020527_ccs	1	2352	2422	Cys	ACA	0	0	-28.58
m64111_201213_171552_80020527_ccs	2	3601	3529	Ser	ACT	0	0	-28.72
m64111_201213_171552_80150960_ccs	1	5837	5909	Ser	GCT	0	0	-30.52
m64111_201213_171552_80806788_ccs	1	3462	3534	Lys	CTT	0	0	-22.87
m64111_201213_171552_80873511_ccs	1	1190	1118	Ser	GCT	0	0	-28.21
m64111_201213_171552_81201154_ccs	1	4660	4589	Ser	GCT	0	0	-28.33
m64111_201213_171552_81266580_ccs0	1	933	1004	Val	AAC	0	0	-28.11
m64111_201213_171552_81266580_ccs0	2	1031	1101	Val	AAC	0	0	-26.64
m64111_201213_171552_81331654_ccs	1	2822	2750	Asn	GTT	0	0	-29.01
m64111_201213_171552_81332890_ccs0	1	68	141	***	CTA	0	0	-30.8
m64111_201213_171552_81461906_ccs	1	2152	2224	Ser	GCT	0	0	-28.26
m64111_201213_171552_81527533_ccs0	1	1016	944	Ser	GCT	0	0	-28.26
m64111_201213_171552_81527533_ccs01	1	554	482	Ser	GCT	0	0	-28.26
m64111_201213_171552_81528347_ccs	1	6592	6521	Ala	TGC	0	0	-28.61
m64111_201213_171552_82052662_ccs	1	3561	3633	Ser	GCT	0	0	-28.26
m64111_201213_171552_82184886_ccs	1	6658	6586	Asn	GTT	0	0	-25.04
m64111_201213_171552_82576764_ccs	1	2583	2654	Glu	TTC	0	0	-18.26
m64111_201213_171552_2950073_ccs	1	881	953	Ser	GCT	0	0	-28.26
m64111_201213_171552_3016188_ccs	1	5493	5562	Cys	GCA	0	0	-30.32
m64111_201213_171552_82643629_ccs0	1	525	597	Ser	ACT	0	0	-22.86
m64111_201213_171552_82643629_ccs0	2	1271	1343	His	GTG	0	0	-29.05
m64111_201213_171552_82643629_ccs0101	1	264	336	Ser	ACT	0	0	-22.86
m64111_201213_171552_83298486_ccs	1	352	422	Gln	TTG	0	0	-29.06
m64111_201213_171552_83821335_ccs0	1	891	819	Lys	CTT	0	0	-29.64
m64111_201213_171552_83821335_ccs01	1	658	586	Lys	CTT	0	0	-29.64
m64111_201213_171552_83952632_ccs0	1	516	588	Ser	GCT	0	0	-30.77
m64111_201213_171552_83952632_ccs01	1	214	286	Ser	GCT	0	0	-30.77
m64111_201213_171552_84017594_ccs	1	1398	1326	Asp	GTC	0	0	-28.61
m64111_201213_171552_84019120_ccs0	1	747	823	Ala	GGC	0	0	-30.62
m64111_201213_171552_84019120_ccs01	1	3856	3932	Ala	GGC	0	0	-25.73
m64111_201213_171552_84085422_ccs	1	265	336	Gly	TCC	0	0	-23.26
m64111_201213_171552_84085422_ccs	2	1147	1075	Ser	GCT	0	0	-30.08
m64111_201213_171552_84149869_ccs	1	226	154	Asn	GTT	0	0	-28.82
m64111_201213_171552_84213979_ccs	1	8024	7954	Leu	TAG	0	0	-30.99
m64111_201213_171552_84213979_ccs	2	5080	5007	Pro	CGG	0	0	-26.31
m64111_201213_171552_84345582_ccs	1	1880	1808	Ser	GCT	0	0	-23.96
m64111_201213_171552_84346562_ccs	1	10249	10179	Thr	AGT	0	0	-31.31
m64111_201213_171552_84609249_ccs0	1	6215	6286	Ser	GCT	0	0	-23.78
m64111_201213_171552_84609249_ccs0	2	1542	1470	Lys	CTT	0	0	-25.25
m64111_201213_171552_84740485_ccs	1	7040	7112	Asn	ATT	0	0	-29.81
m64111_201213_171552_84804914_ccs	1	159	87	Gly	ACC	0	0	-30.89
m64111_201213_171552_84936133_ccs	1	1125	1197	Ser	GCT	0	0	-28.38
m64111_201213_171552_84937235_ccs	1	7076	7004	Ser	GCT	0	0	-26.65
m64111_201213_171552_84937235_ccs	2	6065	5993	Ser	GCT	0	0	-28.26
m64111_201213_171552_85068228_ccs	1	2384	2456	Asn	GTT	0	0	-26.87
m64111_201213_171552_85133496_ccs	1	744	674	Gly	TCC	0	0	-26.11
m64111_201213_171552_85198262_ccs	1	3687	3615	Arg	TCT	0	0	-30.99
m64111_201213_171552_85262804_ccs	1	7248	7320	Ser	GCT	0	0	-21.13
m64111_201213_171552_85395034_ccs	1	6243	6315	Ser	GCT	0	0	-28.26
m64111_201213_171552_85395034_ccs	2	6942	6870	Ser	GCT	0	0	-27.52
m64111_201213_171552_85396128_ccs	1	2450	2521	Lys	CTT	0	0	-31.12
m64111_201213_171552_85787318_ccs	1	384	459	Ser	GCT	0	0	-29.63
m64111_201213_171552_85917728_ccs	1	167	239	Ser	GCT	0	0	-26.18
m64111_201213_171552_86245532_ccs	1	1257	1181	Gly	ACC	0	0	-31.44
m64111_201213_171552_3277385_ccs01	1	844	772	Thr	AGT	0	0	-30.88
m64111_201213_171552_3343771_ccs	1	4463	4390	Asn	GTT	0	0	-23.27
m64111_201213_171552_3343771_ccs	2	4101	4029	Thr	GGT	0	0	-25.04
m64111_201213_171552_86443057_ccs	1	2386	2314	Ser	GCT	0	0	-28.3
m64111_201213_171552_86835851_ccs	1	2550	2622	Lys	CTT	0	0	-30.8
m64111_201213_171552_86836117_ccs	1	1317	1388	Cys	ACA	0	0	-30.66
m64111_201213_171552_86968882_ccs	1	1640	1712	Glu	CTC	0	0	-29.07
m64111_201213_171552_87426627_ccs010	1	281	350	Lys	CTT	0	0	-30.86
m64111_201213_171552_87493196_ccs	1	847	919	Gly	TCC	0	0	-29.15
m64111_201213_171552_87818510_ccs	1	3172	3243	Thr	TGT	0	0	-27
m64111_201213_171552_87951157_ccs	1	3546	3618	Thr	GGT	0	0	-29.35
m64111_201213_171552_88016804_ccs	1	2921	2849	Ser	GCT	0	0	-31.32
m64111_201213_171552_88344143_ccs	1	18663	18590	Ser	GCT	0	0	-28.3
m64111_201213_171552_88671675_ccs	1	1518	1446	Ser	GCT	0	0	-30.36
m64111_201213_171552_88671675_ccs	2	1041	969	Ser	GCT	0	0	-28.26
m64111_201213_171552_88802983_ccs	1	2590	2662	Asn	GTT	0	0	-20.91
m64111_201213_171552_88803497_ccs	1	499	571	Ser	GCT	0	0	-26.27
m64111_201213_171552_88869552_ccs	1	5885	5813	Lys	CTT	0	0	-27.35
m64111_201213_171552_89196733_ccs0	1	774	702	Gly	CCC	0	0	-30.3
m64111_201213_171552_89196733_ccs01	1	2826	2754	Gly	CCC	0	0	-30.3
m64111_201213_171552_89325908_ccs	1	1540	1469	Ser	GCT	0	0	-31.52
m64111_201213_171552_4194305_ccs	1	2024	1952	Ala	TGC	0	0	-30.48
m64111_201213_171552_4590004_ccs	1	113	41	Ser	GCT	0	0	-23.54
m64111_201213_171552_3540439_ccs0	1	1027	956	Met	CAT	0	0	-30.62
m64111_201213_171552_3540439_ccs01	1	287	216	Met	CAT	0	0	-30.62
m64111_201213_171552_3606274_ccs	1	1044	1116	Ala	TGC	0	0	-29.24
m64111_201213_171552_3670473_ccs	1	3265	3336	Gly	CCC	0	0	-22.68
m64111_201213_171552_3670473_ccs	2	3139	2968	Leu	TAG	0	0	-31.19
m64111_201213_171552_4850125_ccs00	1	403	475	Ala	GGC	0	0	-24.58
m64111_201213_171552_4851167_ccs	1	1849	1919	Ser	GCT	0	0	-31
m64111_201213_171552_4851187_ccs	1	2354	2282	Ser	GCT	0	0	-28.26
m64111_201213_171552_4982402_ccs	1	1157	1085	Ser	GCT	0	0	-29.97
m64111_201213_171552_5374914_ccs	1	8392	8322	Gln	TTG	0	0	-29.06
m64111_201213_171552_5440301_ccs	1	337	266	Ala	AGC	0	0	-31.63
m64111_201213_171552_5703141_ccs	1	2687	2759	Lys	CTT	0	0	-24.3
m64111_201213_171552_5834455_ccs0	1	721	792	Ala	AGC	0	0	-22.18
m64111_201213_171552_5834455_ccs0	2	1565	1638	Lys	CTT	0	0	-27.82
m64111_201213_171552_6425257_ccs	1	2517	2589	Gly	TCC	0	0	-30.32
m64111_201213_171552_6685629_ccs	1	6115	6187	Asn	GTT	0	0	-28.26
m64111_201213_171552_6685629_ccs	2	6544	6681	Tyr	ATA	0	0	-30.69
m64111_201213_171552_6949713_ccs	1	2653	2582	Thr	AGT	0	0	-27.4
m64111_201213_171552_7013242_ccs	1	6152	6224	Lys	CTT	0	0	-30.78
m64111_201213_171552_7079490_ccs	1	3378	3450	Ser	GCT	0	0	-25.04
m64111_201213_171552_7209897_ccs	1	1981	2053	Ser	GCT	0	0	-28.26
m64111_201213_171552_7604293_ccs	1	1529	1600	Lys	CTT	0	0	-30.29
m64111_201213_171552_7604293_ccs	2	154	82	Ser	GCT	0	0	-26.85
m64111_201213_171552_3801601_ccs	1	2313	2385	Gln	TTG	0	0	-27.94
m64111_201213_171552_3801601_ccs	2	3484	3555	Lys	CTT	0	0	-27.78
m64111_201213_171552_3867907_ccs	1	940	1011	Ala	TGC	0	0	-31.71
m64111_201213_171552_3933305_ccs	1	2436	2364	Ser	GCT	0	0	-28.26
m64111_201213_171552_7996383_ccs0	1	1274	1352	***	TCA	0	0	-31.38
m64111_201213_171552_7996383_ccs0	2	1794	1866	Ser	GCT	0	0	-28.26
m64111_201213_171552_7996383_ccs01	1	147	225	***	TCA	0	0	-31.38
m64111_201213_171552_7996383_ccs01	2	667	739	Ser	GCT	0	0	-28.26
m64111_201213_171552_8127987_ccs	1	2368	2440	Ser	GCT	0	0	-28.26
m64111_201213_171552_8324526_ccs	1	1921	1993	Ala	AGC	0	0	-27.61
m64111_201213_171552_8324526_ccs	2	3040	3112	Ser	GCT	0	0	-28.3
m64111_201213_171552_89457820_ccs01	1	3136	3065	Lys	CTT	0	0	-23.53
m64111_201213_171552_89655923_ccs	1	8358	8430	Ser	ACT	0	0	-31.79
m64111_201213_171552_89720159_ccs	1	2404	2332	Ile	AAT	0	0	-30.75
m64111_201213_171552_89850822_ccs	1	4430	4502	Cys	GCA	0	0	-29.68
m64111_201213_171552_89916613_ccs	1	2906	2836	Gly	TCC	0	0	-29.7
m64111_201213_171552_89917444_ccs0	1	1463	1391	Thr	GGT	0	0	-28.26
m64111_201213_171552_89917444_ccs01	1	919	847	Thr	GGT	0	0	-28.26
m64111_201213_171552_90047019_ccs0	1	1127	1056	Ala	AGC	0	0	-29.44
m64111_201213_171552_90047019_ccs01	1	319	248	Ala	AGC	0	0	-29.44
m64111_201213_171552_90180074_ccs	1	3101	3029	Ser	GCT	0	0	-30.94
m64111_201213_171552_90180074_ccs	2	569	497	Ser	GCT	0	0	-30.36
m64111_201213_171552_90180074_ccs	3	92	20	Ser	GCT	0	0	-23.37
m64111_201213_171552_90310384_ccs	1	1467	1394	Ala	AGC	0	0	-30.55
m64111_201213_171552_90441979_ccs	1	3878	3950	Asn	GTT	0	0	-31.58
m64111_201213_171552_90769364_ccs	1	2353	2279	Ala	GGC	0	0	-28.26
m64111_201213_171552_90769364_ccs	2	1837	1766	Ser	GCT	0	0	-22.71
m64111_201213_171552_91163237_ccs	1	2376	2304	Gly	TCC	0	0	-29.2
m64111_201213_171552_91226728_ccs0	1	3333	3405	Gly	ACC	0	0	-31.02
m64111_201213_171552_91226728_ccs01	1	2033	2105	Gly	ACC	0	0	-31.02
m64111_201213_171552_91228187_ccs	1	1469	1542	Ser	GCT	0	0	-30.36
m64111_201213_171552_91488530_ccs00	1	451	523	Thr	TGT	0	0	-28.3
m64111_201213_171552_91488530_ccs0101	1	13	85	Thr	TGT	0	0	-28.3
m64111_201213_171552_91882398_ccs	1	805	733	Ser	GCT	0	0	-28.26
m64111_201213_171552_91883999_ccs01	1	128	56	Ser	GCT	0	0	-31.58
m64111_201213_171552_91948502_ccs	1	1337	1409	Lys	CTT	0	0	-21.48
m64111_201213_171552_3999281_ccs	1	5176	5248	Ser	ACT	0	0	-18.67
m64111_201213_171552_4064184_ccs	1	1858	1930	Asn	GTT	0	0	-28.87
m64111_201213_171552_4064184_ccs	2	6218	6146	Ser	GCT	0	0	-27.57
m64111_201213_171552_92341172_ccs0	1	383	311	Ser	GCT	0	0	-28.26
m64111_201213_171552_92341172_ccs01	1	680	608	Ser	GCT	0	0	-28.26
m64111_201213_171552_92932363_ccs	1	4200	4272	Ser	GCT	0	0	-28.26
m64111_201213_171552_92996244_ccs	1	1084	1156	Ser	GCT	0	0	-28.99
m64111_201213_171552_93128337_ccs	1	4013	4084	Val	TAC	0	0	-25.2
m64111_201213_171552_93457115_ccs	1	1744	1672	Ser	ACT	0	0	-28.26
m64111_201213_171552_93784611_ccs	1	2894	2966	Gly	TCC	0	0	-28.43
m64111_201213_171552_94046098_ccs	1	1335	1410	Gly	CCC	0	0	-22.08
m64111_201213_171552_94177264_ccs	1	100	27	Gly	ACC	0	0	-31.33
m64111_201213_171552_94439079_ccs0	1	4312	4242	Ser	TGA	0	0	-29.73
m64111_201213_171552_94439079_ccs0	2	1214	1144	Gln	TTG	0	0	-29.06
m64111_201213_171552_94439296_ccs	1	4220	4149	Leu	CAA	0	0	-30.68
m64111_201213_171552_94505471_ccs	1	3000	3070	Ile	AAT	0	0	-27.75
m64111_201213_171552_94568498_ccs	1	1297	1225	Lys	CTT	0	0	-29.52
m64111_201213_171552_94635482_ccs	1	980	909	Ser	AGA	0	0	-26.66
m64111_201213_171552_94897241_ccs	1	277	205	Ser	GCT	0	0	-31.03
m64111_201213_171552_95028253_ccs	1	2911	2828	Leu	TAA	0	0	-31.1
m64111_201213_171552_95486019_ccs	1	809	737	Ser	ACT	0	0	-30.47
m64111_201213_171552_95618022_ccs	1	808	881	Ser	ACT	0	0	-27.65
m64111_201213_171552_95685023_ccs	1	730	802	Pro	GGG	0	0	-29.05
m64111_201213_171552_95750609_ccs	1	641	569	Asn	ATT	0	0	-21.67
m64111_201213_171552_95750628_ccs	1	2356	2428	Ala	AGC	0	0	-30.03
m64111_201213_171552_95879738_ccs	1	1966	2037	Lys	CTT	0	0	-27.57
m64111_201213_171552_95880390_ccs	1	2300	2371	Thr	AGT	0	0	-22.35
m64111_201213_171552_95945285_ccs0	1	263	335	Ser	GCT	0	0	-28.26
m64111_201213_171552_95947583_ccs	1	427	355	Ser	GCT	0	0	-27.99
m64111_201213_171552_96142601_ccs	1	3655	3584	Thr	AGT	0	0	-27.4
m64111_201213_171552_96272509_ccs	1	742	670	Ala	AGC	0	0	-28.72
m64111_201213_171552_96272935_ccs	1	1764	1836	Gly	TCC	0	0	-29.15
m64111_201213_171552_96272935_ccs	2	2008	2079	Ala	AGC	0	0	-28.66
m64111_201213_171552_96272935_ccs	3	7199	7127	Ser	GCT	0	0	-25.04
m64111_201213_171552_96272935_ccs	4	6472	6400	Ala	TGC	0	0	-29.23
m64111_201213_171552_96272935_ccs	5	6055	5979	Val	GAC	0	0	-25.92
m64111_201213_171552_96272935_ccs	6	4972	4900	Asn	ATT	0	0	-29.53
m64111_201213_171552_96274225_ccs	1	335	406	Ala	AGC	0	0	-26.13
m64111_201213_171552_96274225_ccs	2	1124	1196	Gly	TCC	0	0	-28.43
m64111_201213_171552_96470005_ccs	1	2456	2528	Ser	GCT	0	0	-22.62
m64111_201213_171552_96666757_ccs	1	1750	1677	Lys	CTT	0	0	-26.05
m64111_201213_171552_96733051_ccs0	1	141	213	Lys	CTT	0	0	-31.05
m64111_201213_171552_96733051_ccs01	1	2168	2240	Lys	CTT	0	0	-31.05
m64111_201213_171552_96799315_ccs0	1	5410	5482	Ser	GCT	0	0	-19.66
m64111_201213_171552_96799315_ccs01	1	4720	4792	Ser	GCT	0	0	-24.55
m64111_201213_171552_97126447_ccs	1	1531	1459	Ser	GCT	0	0	-28.26
m64111_201213_171552_97256305_ccs0	1	449	524	Gly	GCC	0	0	-29.74
m64111_201213_171552_97517809_ccs0	1	174	102	Gly	TCC	0	0	-23.15
m64111_201213_171552_97517809_ccs01	1	909	837	Gly	TCC	0	0	-28.04
m64111_201213_171552_97651264_ccs	1	4197	4269	Gly	TCC	0	0	-30.65
m64111_201213_171552_97781132_ccs	1	714	786	Lys	CTT	0	0	-27.92
m64111_201213_171552_97845262_ccs	1	2437	2509	Ser	GCT	0	0	-30.86
m64111_201213_171552_97845285_ccs	1	3989	4060	Ala	AGC	0	0	-31.7
m64111_201213_171552_97976590_ccs	1	1486	1414	Ser	GCT	0	0	-29.82
m64111_201213_171552_98173050_ccs	1	2329	2401	Ser	GCT	0	0	-31.53
m64111_201213_171552_98502353_ccs	1	1138	1210	Trp	CCA	0	0	-31.54
m64111_201213_171552_98633561_ccs	1	2844	2772	Lys	CTT	0	0	-26.78
m64111_201213_171552_98762808_ccs	1	3753	3825	***	CTA	0	0	-30.81
m64111_201213_171552_98762808_ccs	2	5598	5670	Ser	GCT	0	0	-28.88
m64111_201213_171552_98763040_ccs	1	2618	2546	Ser	GCT	0	0	-26.65
m64111_201213_171552_98763687_ccs	1	3341	3268	Ala	AGC	0	0	-23.62
m64111_201213_171552_98830722_ccs	1	6930	7002	Ser	GCT	0	0	-30.48
m64111_201213_171552_98830722_ccs	2	8928	8856	Ser	GCT	0	0	-28.56
m64111_201213_171552_98895045_ccs0	1	458	385	Lys	TTT	0	0	-22.12
m64111_201213_171552_98895045_ccs01	1	355	282	Lys	TTT	0	0	-22.12
m64111_201213_171552_98960662_ccs	1	1782	1708	Ala	GGC	0	0	-28.48
m64111_201213_171552_99026099_ccs	1	326	398	Ser	GCT	0	0	-25.34
m64111_201213_171552_99027286_ccs0	1	1781	1854	Ser	GCT	0	0	-28.55
m64111_201213_171552_99027286_ccs01	1	928	1001	Ser	GCT	0	0	-28.55
m64111_201213_171552_99156055_ccs	1	1573	1644	Ala	AGC	0	0	-27.31
m64111_201213_171552_99157662_ccs	1	4378	4450	Met	CAT	0	0	-28.1
m64111_201213_171552_99221782_ccs	1	1859	1931	Asn	GTT	0	0	-23.86
m64111_201213_171552_99221852_ccs	1	625	697	Glu	CTC	0	0	-30.19
m64111_201213_171552_99287256_ccs	1	6205	6134	Asn	GTT	0	0	-22.38
m64111_201213_171552_99419120_ccs	1	2042	1970	Ser	GCT	0	0	-28.26
m64111_201213_171552_44630990_ccs	1	3766	3839	Ile	GAT	0	0	-26.47
m64111_201213_171552_44631471_ccs0	1	2726	2654	Ser	GCT	0	0	-31.04
m64111_201213_171552_44631471_ccs01	1	2017	1945	Ser	GCT	0	0	-31.04
m64111_201213_171552_44761921_ccs	1	2233	2304	Ala	TGC	0	0	-25.02
m64111_201213_171552_99550857_ccs	1	3754	3682	Gly	TCC	0	0	-25.93
m64111_201213_171552_99615547_ccs0	1	446	518	Glu	CTC	0	0	-31.18
m64111_201213_171552_99746383_ccs	1	3092	3164	Lys	CTT	0	0	-23.56
m64111_201213_171552_100010312_ccs	1	5051	5122	Ala	AGC	0	0	-29.71
m64111_201213_171552_100861010_ccs	1	2500	2428	Ser	GCT	0	0	-29.71
m64111_201213_171552_100861595_ccs	1	2251	2323	Ser	AGA	0	0	-23.5
m64111_201213_171552_101320503_ccs0	1	464	536	Lys	CTT	0	0	-28.26
m64111_201213_171552_101320503_ccs01	1	2334	2406	Lys	CTT	0	0	-23.37
m64111_201213_171552_101581667_ccs	1	1046	1118	Ser	GCT	0	0	-28.31
m64111_201213_171552_101910859_ccs	1	1879	1807	Ser	GCT	0	0	-28.26
m64111_201213_171552_102107584_ccs	1	7956	7883	Ser	GCT	0	0	-31.52
m64111_201213_171552_102303414_ccs	1	2657	2588	***	CTA	0	0	-31.49
m64111_201213_171552_102500427_ccs	1	999	1071	Ser	GCT	0	0	-27.68
m64111_201213_171552_102563913_ccs	1	1029	1101	Ser	GCT	0	0	-30.36
m64111_201213_171552_102563913_ccs	2	1506	1578	Ser	GCT	0	0	-28.26
m64111_201213_171552_102563913_ccs	3	3334	3406	Ser	GCT	0	0	-30.94
m64111_201213_171552_102631547_ccs	1	6473	6543	Ser	TGA	0	0	-29.73
m64111_201213_171552_102631547_ccs	2	10764	10694	Gln	TTG	0	0	-29.06
m64111_201213_171552_102695007_ccs	1	1419	1491	Asn	GTT	0	0	-31.73
m64111_201213_171552_102695007_ccs	2	3029	3101	***	TCA	0	0	-30.41
m64111_201213_171552_102763106_ccs	1	494	422	Ser	ACT	0	0	-25.04
m64111_201213_171552_102892620_ccs	1	4158	4231	Asn	GTT	0	0	-26.65
m64111_201213_171552_102893645_ccs0	1	1529	1601	Ser	GCT	0	0	-25.04
m64111_201213_171552_102893645_ccs01	1	504	576	Ser	GCT	0	0	-25.04
m64111_201213_171552_103022642_ccs	1	5134	5206	Ser	GCT	0	0	-25.04
m64111_201213_171552_103025351_ccs	1	4557	4629	Ser	GCT	0	0	-28.26
m64111_201213_171552_103025351_ccs	2	8481	8553	Lys	CTT	0	0	-24.83
m64111_201213_171552_103025351_ccs	3	9473	9543	Gly	TCC	0	0	-30.84
m64111_201213_171552_103286122_ccs	1	3217	3289	Ser	GCT	0	0	-26.65
m64111_201213_171552_103287207_ccs	1	5907	5979	Val	CAC	0	0	-30.06
m64111_201213_171552_45154434_ccs	1	2923	2851	Ser	GCT	0	0	-27.77
m64111_201213_171552_45222261_ccs	1	2305	2377	Lys	CTT	0	0	-31.58
m64111_201213_171552_45222261_ccs	2	178	106	Ser	GCT	0	0	-28.81
m64111_201213_171552_45222446_ccs	1	1560	1488	Asn	GTT	0	0	-28.26
m64111_201213_171552_103484041_ccs0	1	837	764	Cys	ACA	0	0	-27.97
m64111_201213_171552_103484041_ccs01	1	445	372	Cys	ACA	0	0	-27.97
m64111_201213_171552_103744461_ccs	1	4228	4300	Gly	TCC	0	0	-25.72
m64111_201213_171552_103877182_ccs	1	2588	2660	Lys	CTT	0	0	-27.51
m64111_201213_171552_103941927_ccs	1	5306	5378	Ser	GCT	0	0	-27.72
m64111_201213_171552_104071756_ccs	1	5922	5850	Ser	GCT	0	0	-28.26
m64111_201213_171552_104139545_ccs	1	2065	1881	Ala	TGC	0	0	-31.75
m64111_201213_171552_104661733_ccs0	1	1643	1571	Ser	GCT	0	0	-26.62
m64111_201213_171552_104661733_ccs01	1	1354	1282	Ser	GCT	0	0	-26.62
m64111_201213_171552_104792759_ccs	1	3411	3483	Ser	GCT	0	0	-28.26
m64111_201213_171552_104990848_ccs	1	541	469	Ser	GCT	0	0	-25.04
m64111_201213_171552_105056909_ccs0	1	1884	1956	Lys	CTT	0	0	-26.78
m64111_201213_171552_105056909_ccs01	1	794	866	Lys	CTT	0	0	-26.78
m64111_201213_171552_105057099_ccs	1	670	743	Cys	GCA	0	0	-27.4
m64111_201213_171552_105057099_ccs	2	3033	3106	Asn	ATT	0	0	-28.3
m64111_201213_171552_105251627_ccs	1	11382	11453	Ser	TGA	0	0	-29.73
m64111_201213_171552_105383975_ccs	1	1532	1461	Ser	GGA	0	0	-21.06
m64111_201213_171552_105384401_ccs	1	8568	8641	Arg	TCT	0	0	-26.49
m64111_201213_171552_105581297_ccs	1	3961	3889	Glu	CTC	0	0	-28.56
m64111_201213_171552_105842995_ccs	1	2679	2751	Ser	GCT	0	0	-28.26
m64111_201213_171552_105842995_ccs	2	622	550	Gln	CTG	0	0	-31.07
m64111_201213_171552_105907227_ccs	1	2114	2186	Lys	CTT	0	0	-28.3
m64111_201213_171552_106300572_ccs	1	1071	999	Lys	TTT	0	0	-24.3
m64111_201213_171552_106367458_ccs	1	2984	3056	Ser	GCT	0	0	-28.26
m64111_201213_171552_106497027_ccs	1	1421	1493	Ser	GCT	0	0	-28.26
m64111_201213_171552_106693221_ccs	1	3556	3484	Leu	GAG	0	0	-28.45
m64111_201213_171552_107021667_ccs0	1	429	501	Arg	CCT	0	0	-29.17
m64111_201213_171552_45482718_ccs	1	3950	4020	Ser	AGA	0	0	-30.55
m64111_201213_171552_45482718_ccs	2	790	718	Lys	CTT	0	0	-22.86
m64111_201213_171552_45484412_ccs	1	840	912	***	CTA	0	0	-23.03
m64111_201213_171552_45484412_ccs	2	1264	1336	Ser	GCT	0	0	-29.28
m64111_201213_171552_45484412_ccs	3	7058	6986	Ser	GCT	0	0	-28.26
m64111_201213_171552_45484412_ccs	4	5006	4934	Ser	GCT	0	0	-23.08
m64111_201213_171552_45549389_ccs0	1	146	217	Gly	CCC	0	0	-31.79
m64111_201213_171552_45549389_ccs01	1	1954	2025	Gly	CCC	0	0	-31.79
m64111_201213_171552_1223_ccs	1	3081	3150	Asn	GTT	0	0	-30.63
m64111_201213_171552_107152783_ccs	1	5435	5363	Ser	GCT	0	0	-29.36
m64111_201213_171552_107217960_ccs	1	3865	3793	Asn	GTT	0	0	-28.26
m64111_201213_171552_107414368_ccs	1	5328	5257	Leu	GAG	0	0	-31.77
m64111_201213_171552_107414368_ccs	2	3948	3879	Lys	TTT	0	0	-30.69
m64111_201213_171552_107479770_ccs	1	261	333	Asn	ATT	0	0	-22.87
m64111_201213_171552_107611583_ccs	1	336	408	Ser	GCT	0	0	-28.26
m64111_201213_171552_108005527_ccs	1	5409	5337	Ala	TGC	0	0	-30.46
m64111_201213_171552_108069398_ccs	1	1991	2063	Ser	GCT	0	0	-31.06
m64111_201213_171552_108071638_ccs	1	2684	2612	Ser	GCT	0	0	-25.04
m64111_201213_171552_108397521_ccs	1	4230	4302	Ser	GCT	0	0	-29.77
m64111_201213_171552_108528840_ccs	1	4677	4749	Asn	GTT	0	0	-29.38
m64111_201213_171552_108593240_ccs	1	447	519	Ser	ACT	0	0	-29.92
m64111_201213_171552_108593240_ccs	2	1468	1540	Gly	ACC	0	0	-27.74
m64111_201213_171552_108725339_ccs0	1	4746	4674	Asn	GTT	0	0	-28.26
m64111_201213_171552_108725339_ccs01	1	3186	3114	Asn	GTT	0	0	-28.26
m64111_201213_171552_109052993_ccs	1	7591	7519	Asn	GTT	0	0	-30.22
m64111_201213_171552_109054096_ccs	1	4968	5040	Lys	CTT	0	0	-28.1
m64111_201213_171552_109117557_ccs	1	2828	2756	Ser	ACT	0	0	-31.58
m64111_201213_171552_109118312_ccs	1	3013	3084	Gly	ACC	0	0	-31.56
m64111_201213_171552_109576866_ccs	1	1936	1865	Gly	TCC	0	0	-21.19
m64111_201213_171552_109840551_ccs	1	477	549	Thr	GGT	0	0	-28.26
m64111_201213_171552_110037705_ccs	1	7554	7626	Ser	ACT	0	0	-28.26
m64111_201213_171552_110167087_ccs	1	3141	3213	Asn	GTT	0	0	-26.43
m64111_201213_171552_110168457_ccs	1	5703	5631	Ser	GCT	0	0	-28.56
m64111_201213_171552_110297565_ccs	1	2818	2747	***	CTA	0	0	-29.58
m64111_201213_171552_110298518_ccs	1	9204	9276	Ser	GCT	0	0	-23.32
m64111_201213_171552_110298518_ccs	2	271	199	Ser	GCT	0	0	-28.26
m64111_201213_171552_110364142_ccs	1	1509	1581	Ser	GCT	0	0	-29.51
m64111_201213_171552_110365411_ccs	1	193	123	Lys	CTT	0	0	-23.72
m64111_201213_171552_110624872_ccs	1	4963	5035	Ser	GCT	0	0	-26.77
m64111_201213_171552_110625543_ccs	1	475	546	Gly	CCC	0	0	-29.91
m64111_201213_171552_110757473_ccs	1	8172	8243	Leu	TAG	0	0	-29.43
m64111_201213_171552_45877034_ccs	1	3935	3865	Gln	TTG	0	0	-29.06
m64111_201213_171552_46072277_ccs	1	235	163	Lys	TTT	0	0	-31.34
m64111_201213_171552_46074420_ccs	1	8575	8646	***	TCA	0	0	-28.8
m64111_201213_171552_46074656_ccs	1	3330	3402	Ser	GCT	0	0	-26.14
m64111_201213_171552_110823545_ccs	1	319	247	Ser	GCT	0	0	-26.27
m64111_201213_171552_111017990_ccs	1	7757	7823	Gly	CCC	0	0	-28.04
m64111_201213_171552_111018649_ccs	1	2721	2791	Ser	GCT	0	0	-31
m64111_201213_171552_111348066_ccs	1	3746	3674	Lys	CTT	0	0	-23.08
m64111_201213_171552_111348066_ccs	2	1074	1002	Gly	GCC	0	0	-30.97
m64111_201213_171552_111413844_ccs	1	3472	3402	Lys	CTT	0	0	-28.99
m64111_201213_171552_111871144_ccs	1	2792	2864	Ser	GCT	0	0	-22.86
m64111_201213_171552_112198655_ccs	1	6829	6901	Asn	ATT	0	0	-24.31
m64111_201213_171552_112199940_ccs	1	3325	3397	Ser	GCT	0	0	-24.55
m64111_201213_171552_112200098_ccs	1	9073	9001	Ser	GCT	0	0	-28.26
m64111_201213_171552_112200098_ccs	2	4433	4362	Ala	AGC	0	0	-30.57
m64111_201213_171552_112329224_ccs	1	3357	3285	Ser	GCT	0	0	-24.51
m64111_201213_171552_112396034_ccs	1	1231	1160	Lys	CTT	0	0	-24.24
m64111_201213_171552_112722426_ccs	1	1233	1303	Gln	TTG	0	0	-29.06
m64111_201213_171552_113051464_ccs	1	1175	1103	Gly	TCC	0	0	-26.88
m64111_201213_171552_113117333_ccs	1	3666	3593	Leu	TAA	0	0	-31.38
m64111_201213_171552_113117790_ccs	1	2261	2333	Ser	GCT	0	0	-23.37
m64111_201213_171552_113248603_ccs	1	3828	3756	Asp	GTC	0	0	-29.95
m64111_201213_171552_113443868_ccs	1	333	262	Val	AAC	0	0	-27.99
m64111_201213_171552_113509737_ccs0	1	2417	2489	Asp	GTC	0	0	-28.12
m64111_201213_171552_113574611_ccs	1	1382	1454	Pro	AGG	0	0	-24.53
m64111_201213_171552_113639643_ccs0	1	157	84	Cys	ACA	0	0	-31.58
m64111_201213_171552_113640225_ccs00	1	370	298	Ser	GCT	0	0	-25.66
m64111_201213_171552_113706308_ccs	1	2113	2183	***	TTA	0	0	-30.04
m64111_201213_171552_113772234_ccs	1	3148	3076	Gly	TCC	0	0	-30.89
m64111_201213_171552_113772440_ccs	1	15108	15038	Ser	TGA	0	0	-29.73
m64111_201213_171552_113772440_ccs	2	11995	11925	Gln	TTG	0	0	-29.06
m64111_201213_171552_113837104_ccs	1	2040	2112	Ser	GCT	0	0	-28.86
m64111_201213_171552_113837104_ccs	2	265	194	Ala	AGC	0	0	-27.7
m64111_201213_171552_113837613_ccs	1	1937	1865	Gly	TCC	0	0	-24.33
m64111_201213_171552_113904331_ccs	1	2428	2356	Thr	GGT	0	0	-26.25
m64111_201213_171552_46269044_ccs	1	434	506	Asn	GTT	0	0	-28.26
m64111_201213_171552_46400232_ccs	1	5008	4936	Thr	GGT	0	0	-27.7
m64111_201213_171552_114491392_ccs	1	1107	1035	Asn	GTT	0	0	-26.65
m64111_201213_171552_114494220_ccs	1	7102	7174	Ser	GCT	0	0	-28.26
m64111_201213_171552_115149188_ccs	1	4065	4141	Ser	GCT	0	0	-31.64
m64111_201213_171552_115213201_ccs0	1	1025	953	Lys	CTT	0	0	-22.87
m64111_201213_171552_115213201_ccs01	1	339	267	Lys	CTT	0	0	-22.87
m64111_201213_171552_115213613_ccs0	1	1604	1676	Lys	CTT	0	0	-31.58
m64111_201213_171552_115343989_ccs	1	2475	2547	Asn	GTT	0	0	-28.26
m64111_201213_171552_115343989_ccs	2	7309	7237	Ser	GCT	0	0	-28.26
m64111_201213_171552_115540188_ccs	1	526	454	Ser	GCT	0	0	-28.26
m64111_201213_171552_115608410_ccs	1	3825	3897	Ser	GCT	0	0	-28.26
m64111_201213_171552_115673630_ccs	1	786	856	Gln	TTG	0	0	-29.06
m64111_201213_171552_115737001_ccs	1	2641	2718	Asn	GTT	0	0	-29.16
m64111_201213_171552_115803159_ccs	1	167	238	Ser	ACT	0	0	-28.8
m64111_201213_171552_115803159_ccs	2	1801	1873	Ser	GCT	0	0	-25.34
m64111_201213_171552_115869139_ccs	1	4107	4179	Ser	GCT	0	0	-28.26
m64111_201213_171552_115869139_ccs	2	7290	7219	Gly	TCC	0	0	-26.15
m64111_201213_171552_115869139_ccs	3	3455	3383	Asn	GTT	0	0	-27.57
m64111_201213_171552_115869139_ccs	4	480	405	Val	CAC	0	0	-30.18
m64111_201213_171552_115869167_ccs0	1	83	13	Cys	GCA	0	0	-28.82
m64111_201213_171552_115934896_ccs	1	5016	5092	Asn	ATT	0	0	-28.61
m64111_201213_171552_115999554_ccs	1	691	765	Lys	CTT	0	0	-29.28
m64111_201213_171552_115999554_ccs	2	1653	1725	Ser	GCT	0	0	-25.04
m64111_201213_171552_115999554_ccs	3	6104	6176	Val	CAC	0	0	-29.19
m64111_201213_171552_116065797_ccs0	1	2657	2729	Asn	GTT	0	0	-26.64
m64111_201213_171552_116065797_ccs01	1	1958	2030	Asn	GTT	0	0	-26.64
m64111_201213_171552_116787991_ccs	1	1463	1536	Asn	GTT	0	0	-28.25
m64111_201213_171552_116851046_ccs	1	323	395	Ser	GCT	0	0	-26.78
m64111_201213_171552_117115240_ccs	1	7687	7615	Lys	CTT	0	0	-27.1
m64111_201213_171552_117375419_ccs0	1	1316	1388	Ser	GCT	0	0	-28.26
m64111_201213_171552_46531577_ccs	1	904	976	Asn	GTT	0	0	-26.64
m64111_201213_171552_46858251_ccs	1	2290	2108	Ala	AGC	0	0	-31.45
m64111_201213_171552_117704863_ccs	1	1475	1546	Ala	AGC	0	0	-30.7
m64111_201213_171552_117900390_ccs	1	1429	1500	Ala	AGC	0	0	-31.63
m64111_201213_171552_117902025_ccs	1	1129	1057	Ser	GCT	0	0	-26.62
m64111_201213_171552_118096358_ccs	1	2935	3008	Ser	GCT	0	0	-30.39
m64111_201213_171552_118096358_ccs	2	4953	5025	Asn	GTT	0	0	-24.47
m64111_201213_171552_118096358_ccs	3	1136	1064	Ala	AGC	0	0	-24.31
m64111_201213_171552_118163297_ccs	1	546	618	Lys	CTT	0	0	-29.32
m64111_201213_171552_118228109_ccs0	1	2138	2211	Asn	ATT	0	0	-30.86
m64111_201213_171552_118228109_ccs01	1	770	842	Gly	GCC	0	0	-26.91
m64111_201213_171552_118424802_ccs	1	3637	3566	Ser	TGA	0	0	-29.73
m64111_201213_171552_118424802_ccs	2	538	468	Gln	TTG	0	0	-29.06
m64111_201213_171552_118555974_ccs	1	14439	14511	Ser	GCT	0	0	-28.56
m64111_201213_171552_118555974_ccs	2	7512	7440	Arg	TCT	0	0	-27.54
m64111_201213_171552_118620435_ccs	1	1426	1354	Ser	ACT	0	0	-30.08
m64111_201213_171552_118817848_ccs0	1	373	301	Ser	GCT	0	0	-29.96
m64111_201213_171552_118817848_ccs01	1	758	686	Ser	GCT	0	0	-29.96
m64111_201213_171552_118819262_ccs	1	3543	3615	Lys	CTT	0	0	-27.9
m64111_201213_171552_119014633_ccs	1	742	813	Ala	AGC	0	0	-24.39
m64111_201213_171552_119015954_ccs	1	1392	1321	Ala	AGC	0	0	-24.54
m64111_201213_171552_119276379_ccs	1	2463	2392	Asn	GTT	0	0	-27.34
m64111_201213_171552_119409247_ccs	1	1928	1856	Lys	CTT	0	0	-28.43
m64111_201213_171552_119735197_ccs	1	1670	1742	Ser	GCT	0	0	-30.08
m64111_201213_171552_119801169_ccs	1	6600	6672	Asn	GTT	0	0	-28.56
m64111_201213_171552_120063700_ccs	1	6999	6927	Ser	GCT	0	0	-28.82
m64111_201213_171552_120064783_ccs	1	1126	1198	Ile	GAT	0	0	-26.35
m64111_201213_171552_120326917_ccs01	1	3582	3652	Gln	TTG	0	0	-29.06
m64111_201213_171552_120456769_ccs	1	919	991	Ser	GCT	0	0	-25.04
m64111_201213_171552_120457590_ccs	1	473	545	Asn	GTT	0	0	-26.65
m64111_201213_171552_120588692_ccs	1	238	166	Pro	AGG	0	0	-24.53
m64111_201213_171552_120850557_ccs	1	4062	4132	Asn	GTT	0	0	-28.26
m64111_201213_171552_121243165_ccs	1	6675	6603	Ile	GAT	0	0	-22.12
m64111_201213_171552_121243165_ccs	2	5314	5228	Thr	AGT	0	0	-30.52
m64111_201213_171552_121374546_ccs	1	2762	2834	Asn	GTT	0	0	-31.48
m64111_201213_171552_121375301_ccs	1	5009	5080	Ala	GGC	0	0	-27.89
m64111_201213_171552_121438884_ccs0	1	1094	1021	Val	CAC	0	0	-30.75
m64111_201213_171552_121438884_ccs01	1	622	549	Val	CAC	0	0	-30.75
m64111_201213_171552_47123006_ccs01	1	873	944	Met	CAT	0	0	-31.26
m64111_201213_171552_47186871_ccs	1	2134	2063	Ser	ACT	0	0	-30.7
m64111_201213_171552_121504807_ccs0	1	326	239	Gly	GCC	0	0	-31.67
m64111_201213_171552_121504807_ccs01	1	460	373	Gly	GCC	0	0	-31.67
m64111_201213_171552_121570401_ccs	1	77	5	Ser	GCT	0	0	-23.37
m64111_201213_171552_121635648_ccs	1	255	183	Ser	GCT	0	0	-28.26
m64111_201213_171552_121636072_ccs	1	3118	3046	Ser	GCT	0	0	-30.62
m64111_201213_171552_121964039_ccs	1	2579	2507	Gln	CTG	0	0	-25.85
m64111_201213_171552_122356264_ccs	1	8400	8328	Ser	GCT	0	0	-30
m64111_201213_171552_122357248_ccs	1	796	867	Gly	TCC	0	0	-19.22
m64111_201213_171552_122554351_ccs	1	179	107	Asn	GTT	0	0	-23.37
m64111_201213_171552_122555040_ccs	1	3906	3834	Ser	GCT	0	0	-29.91
m64111_201213_171552_123012907_ccs	1	58	130	Asn	GTT	0	0	-26.43
m64111_201213_171552_123142448_ccs	1	30	101	Val	AAC	0	0	-26.93
m64111_201213_171552_123144837_ccs0	1	825	903	Arg	TCG	0	0	-28.28
m64111_201213_171552_123207968_ccs	1	2476	2548	Asn	GTT	0	0	-29.01
m64111_201213_171552_123732945_ccs	1	4114	4042	Ser	GCT	0	0	-29.93
m64111_201213_171552_123732945_ccs	2	1902	1830	Ser	GCT	0	0	-30.22
m64111_201213_171552_124060024_ccs	1	3144	3216	Asn	GTT	0	0	-30.26
m64111_201213_171552_124060024_ccs	2	5586	5658	Gln	CTG	0	0	-29.68
m64111_201213_171552_124061426_ccs	1	1562	1632	Glu	CTC	0	0	-31.6
m64111_201213_171552_124323862_ccs	1	4070	4142	Ser	GCT	0	0	-24.69
m64111_201213_171552_124847356_ccs	1	910	982	Gly	ACC	0	0	-29.71
m64111_201213_171552_124847356_ccs	2	2457	2385	Ser	GCT	0	0	-28.26
m64111_201213_171552_124911777_ccs	1	747	820	Ser	GCT	0	0	-26.23
m64111_201213_171552_124911777_ccs	2	10872	10804	Asn	GTT	0	0	-25.86
m64111_201213_171552_124911777_ccs	3	5197	5125	Asn	ATT	0	0	-31.43
m64111_201213_171552_47252719_ccs	1	3071	2997	Ala	AGC	0	0	-30.69
m64111_201213_171552_47252854_ccs	1	1358	1430	Ser	GCT	0	0	-28.25
m64111_201213_171552_47318008_ccs	1	6755	6827	Ser	GCT	0	0	-29.75
m64111_201213_171552_47318008_ccs	2	6946	7018	Ser	GCT	0	0	-22.86
m64111_201213_171552_47318008_ccs	3	4015	3943	Ser	GCT	0	0	-26.09
m64111_201213_171552_47319206_ccs	1	413	485	Gly	GCC	0	0	-30.29
m64111_201213_171552_125438777_ccs	1	211	57	Val	AAC	0	0	-25.33
m64111_201213_171552_125503844_ccs	1	164	93	Ala	TGC	0	0	-13.14
m64111_201213_171552_125634883_ccs	1	883	958	Ser	GCT	0	0	-25.04
m64111_201213_171552_125764125_ccs	1	1742	1669	Gly	ACC	0	0	-30.99
m64111_201213_171552_125765242_ccs	1	416	344	Thr	GGT	0	0	-28.95
m64111_201213_171552_126159212_ccs	1	5139	5211	Val	GAC	0	0	-30.78
m64111_201213_171552_126224927_ccs	1	710	781	Ser	GCT	0	0	-28.26
m64111_201213_171552_126682144_ccs	1	4456	4384	Asn	GTT	0	0	-27.57
m64111_201213_171552_127010625_ccs	1	733	661	Ser	GCT	0	0	-29.36
m64111_201213_171552_127140731_ccs	1	182	110	Ser	GCT	0	0	-31.53
m64111_201213_171552_127207267_ccs	1	6197	6123	Ala	GGC	0	0	-28.26
m64111_201213_171552_127207267_ccs	2	5682	5611	Ser	GCT	0	0	-22.71
m64111_201213_171552_127336911_ccs	1	1772	1700	Ser	GCT	0	0	-28.86
m64111_201213_171552_127928209_ccs	1	2354	2426	Ser	GCT	0	0	-28.26
m64111_201213_171552_127928209_ccs	2	2559	2640	His	GTG	0	0	-27.71
m64111_201213_171552_128188864_ccs	1	7539	7467	Asn	GTT	0	0	-29.71
m64111_201213_171552_128385183_ccs00	1	1073	1145	Lys	CTT	0	0	-27.34
m64111_201213_171552_128385183_ccs001	1	884	956	Lys	CTT	0	0	-27.34
m64111_201213_171552_128385183_ccs01	1	215	287	Lys	CTT	0	0	-27.34
m64111_201213_171552_128517171_ccs	1	1084	1011	Lys	CTT	0	0	-25.91
m64111_201213_171552_128517328_ccs	1	760	832	Lys	CTT	0	0	-31.51
m64111_201213_171552_128780132_ccs	1	1009	1081	Lys	TTT	0	0	-27.57
m64111_201213_171552_128780993_ccs01	1	988	916	Ser	GCT	0	0	-23.08
m64111_201213_171552_128977370_ccs	1	2626	2698	Asn	GTT	0	0	-30.22
m64111_201213_171552_47579502_ccs	1	1186	1258	Lys	TTT	0	0	-28.55
m64111_201213_171552_47710551_ccs	1	1089	1017	Asn	ATT	0	0	-22.87
m64111_201213_171552_47777885_ccs0	1	1440	1512	Ser	GCT	0	0	-28.82
m64111_201213_171552_47777885_ccs01	1	844	916	Ser	GCT	0	0	-28.82
m64111_201213_171552_47843934_ccs	1	667	739	Asn	GTT	0	0	-28.59
m64111_201213_171552_129304414_ccs	1	4487	4559	Arg	TCT	0	0	-25.92
m64111_201213_171552_129630939_ccs	1	2740	2668	Ser	GCT	0	0	-24.72
m64111_201213_171552_129631919_ccs	1	1260	1332	Lys	CTT	0	0	-30.69
m64111_201213_171552_129632268_ccs	1	65	138	Lys	CTT	0	0	-27.82
m64111_201213_171552_129632268_ccs	2	1060	1131	Ala	AGC	0	0	-22.18
m64111_201213_171552_129826846_ccs	1	2211	2283	Gly	GCC	0	0	-28.26
m64111_201213_171552_129827110_ccs	1	928	856	Asn	GTT	0	0	-28.26
m64111_201213_171552_129960374_ccs	1	405	477	Ser	GCT	0	0	-26.14
m64111_201213_171552_130023426_ccs	1	5798	5727	Gly	GCC	0	0	-30.46
m64111_201213_171552_130024182_ccs	1	2942	3014	Asn	GTT	0	0	-28.26
m64111_201213_171552_130026220_ccs	1	2118	2047	Lys	CTT	0	0	-23.53
m64111_201213_171552_130091673_ccs0	1	1376	1304	Gly	TCC	0	0	-29.19
m64111_201213_171552_130091673_ccs01	1	1614	1542	Gly	TCC	0	0	-29.19
m64111_201213_171552_130155517_ccs	1	2490	2562	Ser	GCT	0	0	-28.26
m64111_201213_171552_130221215_ccs	1	2738	2666	Ser	GCT	0	0	-28.26
m64111_201213_171552_130417681_ccs	1	347	419	Ser	GCT	0	0	-31.03
m64111_201213_171552_130941546_ccs	1	2223	2151	Ser	GCT	0	0	-28.26
m64111_201213_171552_130941932_ccs	1	1006	935	Ala	AGC	0	0	-23.96
m64111_201213_171552_131072847_ccs	1	193	265	Ser	GCT	0	0	-23.08
m64111_201213_171552_131531935_ccs	1	1909	1981	Ser	GCT	0	0	-28.21
m64111_201213_171552_131729739_ccs	1	579	651	Ser	ACT	0	0	-30.08
m64111_201213_171552_131860963_ccs	1	1913	1841	Ser	GCT	0	0	-28.26
m64111_201213_171552_132121877_ccs0	1	2101	2029	Ser	GCT	0	0	-28.26
m64111_201213_171552_132121877_ccs01	1	1696	1624	Ser	GCT	0	0	-28.26
m64111_201213_171552_132187863_ccs0	1	1667	1739	Ser	GCT	0	0	-28.26
m64111_201213_171552_132384693_ccs	1	7563	7635	Ser	GCT	0	0	-30.29
m64111_201213_171552_132449459_ccs	1	1226	1297	Ala	GGC	0	0	-28.99
m64111_201213_171552_132449459_ccs	2	2421	2492	Ser	ACT	0	0	-29.8
m64111_201213_171552_132449459_ccs	3	232	160	Ser	GCT	0	0	-28.26
m64111_201213_171552_132514340_ccs0	1	707	779	Asn	ATT	0	0	-25.51
m64111_201213_171552_132776039_ccs	1	4072	4144	Ser	GCT	0	0	-25.59
m64111_201213_171552_132908081_ccs0	1	1	71	Ser	GCT	0	0	-26.09
m64111_201213_171552_132908081_ccs01	1	323	395	Ser	GCT	0	0	-26.09
m64111_201213_171552_47972777_ccs	1	1084	1156	Ser	GCT	0	0	-30.48
m64111_201213_171552_48169146_ccs	1	2731	2803	Ser	GCT	0	0	-28.26
m64111_201213_171552_48171459_ccs	1	5840	5912	Ser	ACT	0	0	-30.33
m64111_201213_171552_133038981_ccs	1	7463	7535	Asn	GTT	0	0	-25.34
m64111_201213_171552_133039734_ccs	1	1306	1378	Ser	GCT	0	0	-24.47
m64111_201213_171552_133106461_ccs	1	1508	1579	Ala	AGC	0	0	-23.7
m64111_201213_171552_133106461_ccs	2	5640	5712	Lys	CTT	0	0	-30.75
m64111_201213_171552_133170810_ccs	1	2399	2327	Asn	GTT	0	0	-26.65
m64111_201213_171552_133171489_ccs	1	319	249	Ser	GCT	0	0	-30.89
m64111_201213_171552_133433746_ccs	1	5019	5091	Ala	AGC	0	0	-23.34
m64111_201213_171552_133563292_ccs	1	214	129	Lys	CTT	0	0	-26.83
m64111_201213_171552_133630324_ccs	1	2111	2040	Thr	TGT	0	0	-29.53
m64111_201213_171552_133825128_ccs	1	3748	3676	Ser	GCT	0	0	-22.87
m64111_201213_171552_133826645_ccs	1	12652	12578	Asn	ATT	0	0	-29.71
m64111_201213_171552_133957343_ccs	1	2189	2118	Gly	TCC	0	0	-30.49
m64111_201213_171552_133957991_ccs	1	1007	1078	Thr	TGT	0	0	-27
m64111_201213_171552_134021590_ccs	1	2949	2877	Thr	GGT	0	0	-25.74
m64111_201213_171552_134022706_ccs	1	623	695	Thr	TGT	0	0	-25.58
m64111_201213_171552_134154891_ccs0	1	1389	1317	Ser	GCT	0	0	-28.26
m64111_201213_171552_134154891_ccs01	1	2224	2152	Ser	GCT	0	0	-28.26
m64111_201213_171552_134219930_ccs	1	3849	3920	Arg	TCT	0	0	-31.76
m64111_201213_171552_8455270_ccs	1	1541	1613	Arg	TCT	0	0	-28.66
m64111_201213_171552_8521341_ccs	1	122	194	Ala	AGC	0	0	-31.23
m64111_201213_171552_8521341_ccs	2	861	933	Lys	CTT	0	0	-25
m64111_201213_171552_8849528_ccs	1	361	289	Gln	CTG	0	0	-25.11
m64111_201213_171552_8913410_ccs	1	4596	4524	Gly	TCC	0	0	-31.6
m64111_201213_171552_8980546_ccs	1	286	214	Ser	GCT	0	0	-29.77
m64111_201213_171552_9175266_ccs0	1	1843	1771	Ser	GCT	0	0	-31.03
m64111_201213_171552_9175266_ccs01	1	863	791	Ser	GCT	0	0	-31.03
m64111_201213_171552_9175528_ccs	1	3692	3619	Arg	CCT	0	0	-30.48
m64111_201213_171552_9242935_ccs	1	726	798	Lys	CTT	0	0	-31.34
m64111_201213_171552_9635267_ccs	1	450	521	Gln	CTG	0	0	-22.01
m64111_201213_171552_9699821_ccs0	1	944	1016	Ser	GCT	0	0	-28.26
m64111_201213_171552_10028636_ccs	1	2835	2763	Asn	GTT	0	0	-28.95
m64111_201213_171552_10488189_ccs	1	276	348	Ser	GCT	0	0	-28.26
m64111_201213_171552_10488189_ccs	2	1204	1276	Ser	GCT	0	0	-28.26
m64111_201213_171552_10553409_ccs	1	807	735	Ser	GCT	0	0	-30.57
m64111_201213_171552_48432451_ccs	1	3448	3376	Ser	GCT	0	0	-26.65
m64111_201213_171552_48432755_ccs	1	5261	5331	Ala	AGC	0	0	-27.74
m64111_201213_171552_48432755_ccs	2	3958	3887	Lys	CTT	0	0	-22.86
m64111_201213_171552_10616904_ccs	1	952	1024	Ser	GCT	0	0	-28.26
m64111_201213_171552_11339401_ccs	1	3932	4004	Ser	GCT	0	0	-26.03
m64111_201213_171552_11535359_ccs01	1	5024	5096	Asp	GTC	0	0	-30.3
m64111_201213_171552_11994773_ccs	1	4244	4172	Lys	CTT	0	0	-31.65
m64111_201213_171552_12191675_ccs	1	5457	5529	Ser	GCT	0	0	-28.8
m64111_201213_171552_12321919_ccs	1	1337	1264	Lys	TTT	0	0	-28.07
m64111_201213_171552_12388621_ccs	1	8463	8391	Ser	GCT	0	0	-28.12
m64111_201213_171552_12583444_ccs0	1	630	702	Ser	GCT	0	0	-28.38
m64111_201213_171552_134482116_ccs0	1	3550	3478	Asn	GTT	0	0	-28.26
m64111_201213_171552_134482116_ccs0	2	2710	2639	Thr	TGT	0	0	-29.99
m64111_201213_171552_134611533_ccs	1	1447	1519	Asn	GTT	0	0	-30.46
m64111_201213_171552_135398976_ccs	1	600	671	Cys	GCA	0	0	-31.61
m64111_201213_171552_48628892_ccs	1	14329	14259	Ser	TGA	0	0	-29.73
m64111_201213_171552_48628892_ccs	2	11225	11155	Gln	TTG	0	0	-29.06
m64111_201213_171552_48695297_ccs	1	694	766	Ser	GCT	0	0	-28.26
m64111_201213_171552_136120199_ccs	1	1445	1373	Lys	CTT	0	0	-22.87
m64111_201213_171552_136317037_ccs	1	272	344	Ala	TGC	0	0	-29.23
m64111_201213_171552_136513935_ccs	1	4059	4136	Ser	GCT	0	0	-29.57
m64111_201213_171552_136577933_ccs0	1	4876	4804	Ser	GCT	0	0	-28.26
m64111_201213_171552_136577933_ccs01	1	2315	2243	Ser	GCT	0	0	-28.26
m64111_201213_171552_136643769_ccs	1	547	619	Asn	GTT	0	0	-25.21
m64111_201213_171552_136643769_ccs	2	287	215	Ala	AGC	0	0	-26.99
m64111_201213_171552_136906524_ccs	1	1465	1393	Val	AAC	0	0	-28.85
m64111_201213_171552_138084770_ccs	1	1590	1517	Leu	CAG	0	0	-30.83
m64111_201213_171552_138084871_ccs	1	832	760	Arg	CCT	0	0	-24.98
m64111_201213_171552_138085093_ccs	1	3392	3464	Thr	AGT	0	0	-27.69
m64111_201213_171552_138152339_ccs	1	2300	2228	Gly	CCC	0	0	-30.3
m64111_201213_171552_138348434_ccs001	1	668	740	Ser	GCT	0	0	-23.37
m64111_201213_171552_138348434_ccs010	1	71	143	Ser	GCT	0	0	-28.26
m64111_201213_171552_138543915_ccs	1	369	441	Gly	TCC	0	0	-23.75
m64111_201213_171552_138545898_ccs	1	273	345	Ser	GCT	0	0	-23.01
m64111_201213_171552_138609290_ccs	1	966	894	Ser	GCT	0	0	-28.26
m64111_201213_171552_138807410_ccs	1	1924	1848	Ala	GGC	0	0	-30.62
m64111_201213_171552_138871019_ccs	1	67	1	Lys	CTT	0	0	-19.32
m64111_201213_171552_138936967_ccs	1	3213	3284	Ala	AGC	0	0	-26.02
m64111_201213_171552_49086695_ccs	1	3628	3557	Cys	ACA	0	0	-30.81
m64111_201213_171552_49217852_ccs	1	9289	9216	Ser	GCT	0	0	-28.26
m64111_201213_171552_49217852_ccs	2	4119	4047	Ser	GCT	0	0	-31.04
m64111_201213_171552_49217931_ccs	1	155	227	Ser	GCT	0	0	-28.31
m64111_201213_171552_49218539_ccs0	1	830	758	Ser	GCT	0	0	-28.22
m64111_201213_171552_49218539_ccs01	1	2504	2432	Ser	GCT	0	0	-28.22
m64111_201213_171552_49219780_ccs	1	2069	1997	Ser	GCT	0	0	-29.86
m64111_201213_171552_525523_ccs	1	4271	4199	Ser	GCT	0	0	-25.91
m64111_201213_171552_525523_ccs	2	2163	2090	Ser	GCT	0	0	-25.11
m64111_201213_171552_525523_ccs	3	95	23	Ser	GCT	0	0	-22.68
m64111_201213_171552_139461043_ccs	1	3797	3725	Ser	GCT	0	0	-24.77
m64111_201213_171552_139527274_ccs	1	503	575	Asn	GTT	0	0	-28.28
m64111_201213_171552_139657740_ccs	1	3585	3657	Gly	ACC	0	0	-31.28
m64111_201213_171552_139921931_ccs	1	2496	2567	Ala	AGC	0	0	-29.71
m64111_201213_171552_140052473_ccs	1	859	929	***	TCA	0	0	-29.77
m64111_201213_171552_140117713_ccs0	1	239	311	Asn	GTT	0	0	-28.17
m64111_201213_171552_140183806_ccs	1	438	510	Ser	GCT	0	0	-28.26
m64111_201213_171552_140247065_ccs	1	4713	4643	Gln	TTG	0	0	-29.06
m64111_201213_171552_140247065_ccs	2	790	720	Ser	TGA	0	0	-29.73
m64111_201213_171552_140313791_ccs	1	2401	2471	Ser	TGA	0	0	-29.73
m64111_201213_171552_140313791_ccs	2	5501	5571	Gln	TTG	0	0	-29.06
m64111_201213_171552_140445100_ccs0	1	1689	1760	Gly	TCC	0	0	-30.49
m64111_201213_171552_140445100_ccs0101	1	2283	2354	Gly	TCC	0	0	-30.49
m64111_201213_171552_140969188_ccs	1	8457	8529	Lys	CTT	0	0	-25.25
m64111_201213_171552_140970486_ccs	1	1140	1068	Asn	GTT	0	0	-31.48
m64111_201213_171552_141363387_ccs	1	2435	2251	Ala	TGC	0	0	-31.75
m64111_201213_171552_142672411_ccs	1	1267	1195	Asn	GTT	0	0	-26.65
m64111_201213_171552_142870129_ccs00	1	563	491	Gly	GCC	0	0	-30.96
m64111_201213_171552_142870129_ccs01	1	408	336	Gly	GCC	0	0	-30.96
m64111_201213_171552_142999663_ccs	1	4032	3960	Ser	GCT	0	0	-28.49
m64111_201213_171552_143065839_ccs0	1	1033	1105	Lys	CTT	0	0	-27.2
m64111_201213_171552_143065839_ccs01	1	617	689	Lys	CTT	0	0	-27.2
m64111_201213_171552_143131142_ccs	1	347	275	Val	CAC	0	0	-30.41
m64111_201213_171552_143132238_ccs	1	997	1069	Ser	GCT	0	0	-29.7
m64111_201213_171552_49676365_ccs	1	11081	11153	Asn	GTT	0	0	-25.04
m64111_201213_171552_49678627_ccs	1	1684	1756	Thr	GGT	0	0	-28.26
m64111_201213_171552_143327492_ccs	1	177	253	Gly	GCC	0	0	-25.21
m64111_201213_171552_143591002_ccs	1	1254	1326	Ser	GCT	0	0	-28.56
m64111_201213_171552_143591002_ccs	2	8532	8604	Gly	CCC	0	0	-31.46
m64111_201213_171552_143591002_ccs	3	9093	9021	Asn	GTT	0	0	-25.04
m64111_201213_171552_143591997_ccs	1	243	314	Leu	TAA	0	0	-30.27
m64111_201213_171552_143656084_ccs	1	3827	3757	Ser	TGA	0	0	-29.73
m64111_201213_171552_143656084_ccs	2	729	659	Gln	TTG	0	0	-29.06
m64111_201213_171552_144506924_ccs	1	383	311	Arg	CCT	0	0	-26.81
m64111_201213_171552_144573903_ccs	1	1784	1856	Asn	GTT	0	0	-22.87
m64111_201213_171552_144573903_ccs	2	3230	3158	Ser	GCT	0	0	-28.31
m64111_201213_171552_144836039_ccs	1	1268	1340	Ala	AGC	0	0	-30.98
m64111_201213_171552_145097455_ccs0	1	2105	2174	Ala	AGC	0	0	-28.07
m64111_201213_171552_145097455_ccs01	1	1706	1775	Ala	AGC	0	0	-28.07
m64111_201213_171552_145360520_ccs	1	1933	1860	Ser	GCT	0	0	-30.23
m64111_201213_171552_145361587_ccs	1	4817	4889	Thr	TGT	0	0	-31.19
m64111_201213_171552_145425651_ccs0	1	287	357	Ser	TGA	0	0	-30.13
m64111_201213_171552_145425651_ccs0	2	1835	1764	Ala	GGC	0	0	-25.55
m64111_201213_171552_145425651_ccs01	1	3968	4038	Ser	TGA	0	0	-30.13
m64111_201213_171552_145425651_ccs01	2	1111	1040	Ala	GGC	0	0	-25.55
m64111_201213_171552_146213356_ccs	1	1163	1235	Ser	GCT	0	0	-21.76
m64111_201213_171552_146473774_ccs0	1	282	209	Lys	CTT	0	0	-26.05
m64111_201213_171552_146604908_ccs	1	2472	2544	Ser	GCT	0	0	-28.8
m64111_201213_171552_147195190_ccs	1	678	606	Asn	GTT	0	0	-27.83
m64111_201213_171552_147196053_ccs	1	3611	3536	Trp	CCA	0	0	-29.89
m64111_201213_171552_49743306_ccs	1	3768	3839	Ser	GCT	0	0	-25.26
m64111_201213_171552_49807777_ccs	1	509	581	Ser	GCT	0	0	-30.48
m64111_201213_171552_50005168_ccs	1	255	183	Lys	CTT	0	0	-31.71
m64111_201213_171552_50005213_ccs	1	1291	1363	Ser	GCT	0	0	-30.29
m64111_201213_171552_147327303_ccs	1	200	128	Ser	GCT	0	0	-23.37
m64111_201213_171552_147718410_ccs	1	3361	3289	Thr	GGT	0	0	-27.7
m64111_201213_171552_147786540_ccs	1	4241	4313	Ser	GCT	0	0	-28.26
m64111_201213_171552_148177060_ccs	1	7466	7396	His	ATG	0	0	-31.24
m64111_201213_171552_148310059_ccs	1	173	101	Ser	GCT	0	0	-23.37
m64111_201213_171552_148571686_ccs	1	3028	3099	Ala	AGC	0	0	-27.56
m64111_201213_171552_148964220_ccs	1	940	1012	Ser	GCT	0	0	-28.26
m64111_201213_171552_149095410_ccs	1	1502	1572	Ser	GCT	0	0	-28.26
m64111_201213_171552_149686187_ccs	1	914	986	Phe	GAA	0	0	-27.76
m64111_201213_171552_149815767_ccs0	1	91	19	Ala	AGC	0	0	-27.21
m64111_201213_171552_150143800_ccs	1	1889	1961	Ser	GCT	0	0	-28.26
m64111_201213_171552_150208558_ccs	1	4668	4596	Ser	GCT	0	0	-28.56
m64111_201213_171552_150274645_ccs	1	5464	5536	Ser	GCT	0	0	-28.95
m64111_201213_171552_150864715_ccs0	1	13	85	Ser	GCT	0	0	-30.48
m64111_201213_171552_150864715_ccs01	1	75	147	Ser	GCT	0	0	-30.48
m64111_201213_171552_150866326_ccs	1	8517	8445	Ser	GCT	0	0	-23.39
m64111_201213_171552_150866326_ccs	2	314	242	Ser	ACT	0	0	-28.26
m64111_201213_171552_151455478_ccs	1	2859	2931	Ser	GCT	0	0	-28.26
m64111_201213_171552_151650811_ccs	1	6302	6372	Ser	TGA	0	0	-29.73
m64111_201213_171552_151718281_ccs	1	1376	1307	Met	CAT	0	0	-27.53
m64111_201213_171552_152045671_ccs	1	2374	2303	Ala	AGC	0	0	-26.68
m64111_201213_171552_152504316_ccs	1	2696	2768	Asn	GTT	0	0	-25.04
m64111_201213_171552_152568796_ccs	1	5275	5347	Ser	GCT	0	0	-29.37
m64111_201213_171552_153223590_ccs	1	4480	4549	Trp	CCA	0	0	-31.57
m64111_201213_171552_153224294_ccs	1	1292	1220	Arg	CCT	0	0	-26.44
m64111_201213_171552_153225780_ccs	1	9087	9017	Ser	TGA	0	0	-29.73
m64111_201213_171552_153225780_ccs	2	5988	5918	Gln	TTG	0	0	-29.06
m64111_201213_171552_153421551_ccs	1	690	762	Lys	TTT	0	0	-30.63
m64111_201213_171552_153421551_ccs	2	1379	1307	Lys	CTT	0	0	-29.69
m64111_201213_171552_153616676_ccs	1	4470	4540	Gln	TTG	0	0	-29.06
m64111_201213_171552_153616737_ccs	1	4573	4645	Ser	GCT	0	0	-26.02
m64111_201213_171552_153684531_ccs	1	1297	1226	Gly	CCC	0	0	-31.79
m64111_201213_171552_153946876_ccs	1	3013	2941	Ser	GCT	0	0	-25.04
m64111_201213_171552_153946966_ccs	1	1055	1127	Ser	GCT	0	0	-26.62
m64111_201213_171552_154142162_ccs	1	10275	10200	Gly	GCC	0	0	-29.74
m64111_201213_171552_154142162_ccs	2	4616	4544	Ser	GCT	0	0	-25.04
m64111_201213_171552_154208677_ccs0	1	3285	3357	Ser	GCT	0	0	-25.76
m64111_201213_171552_154535761_ccs	1	3801	3873	Ser	GCT	0	0	-28.26
m64111_201213_171552_154535761_ccs	2	1744	1672	Gln	CTG	0	0	-31.07
m64111_201213_171552_154798029_ccs0	1	2154	2226	Lys	CTT	0	0	-30.8
m64111_201213_171552_154798029_ccs01	1	1307	1379	Lys	CTT	0	0	-30.8
m64111_201213_171552_50727565_ccs	1	3804	3876	Ser	GCT	0	0	-28.26
m64111_201213_171552_155322846_ccs	1	1150	1077	***	CTA	0	0	-30.07
m64111_201213_171552_156238409_ccs0	1	1046	1118	Tyr	GTA	0	0	-25.47
m64111_201213_171552_156238409_ccs01	1	2586	2658	Tyr	GTA	0	0	-25.47
m64111_201213_171552_156303679_ccs0	1	1549	1477	Lys	CTT	0	0	-31.34
m64111_201213_171552_156303679_ccs01	1	938	866	Lys	CTT	0	0	-31.34
m64111_201213_171552_156500093_ccs01	1	1436	1364	Asn	GTT	0	0	-28.26
m64111_201213_171552_156502225_ccs	1	4867	4796	Ala	AGC	0	0	-18.92
m64111_201213_171552_156828946_ccs	1	1628	1553	Ser	GCT	0	0	-30.18
m64111_201213_171552_157025689_ccs	1	4604	4676	Ser	GCT	0	0	-28.26
m64111_201213_171552_157090168_ccs	1	2257	2329	Ser	GCT	0	0	-30.59
m64111_201213_171552_157352736_ccs	1	1872	1800	Asn	ATT	0	0	-26.65
m64111_201213_171552_157483918_ccs	1	3186	3257	Ala	AGC	0	0	-23.22
m64111_201213_171552_157812319_ccs0	1	3267	3339	Ile	AAT	0	0	-29.39
m64111_201213_171552_157812319_ccs01	1	1799	1871	Ile	AAT	0	0	-29.39
m64111_201213_171552_157812919_ccs	1	1079	1007	Ser	GCT	0	0	-22.87
m64111_201213_171552_158335724_ccs	1	8219	8291	Ser	GCT	0	0	-28.26
m64111_201213_171552_158403370_ccs0	1	510	435	Ser	GCT	0	0	-29.63
m64111_201213_171552_158403370_ccs01	1	3906	3831	Ser	GCT	0	0	-29.63
m64111_201213_171552_158663158_ccs	1	3215	3299	Asn	GTT	0	0	-30.15
m64111_201213_171552_158663158_ccs	2	4995	4920	Ala	AGC	0	0	-30.28
m64111_201213_171552_158729513_ccs	1	680	609	Gly	GCC	0	0	-31.01
m64111_201213_171552_158730867_ccs	1	5123	5051	Lys	CTT	0	0	-29.01
m64111_201213_171552_51053513_ccs	1	1530	1602	Gly	TCC	0	0	-28.24
m64111_201213_171552_51053513_ccs	2	3402	3330	Ser	GCT	0	0	-26.14
m64111_201213_171552_51118357_ccs	1	1981	2053	Asn	GTT	0	0	-30.78
m64111_201213_171552_51184387_ccs	1	4523	4451	Lys	CTT	0	0	-27.29
m64111_201213_171552_51184632_ccs	1	5059	5129	Ser	TGA	0	0	-29.73
m64111_201213_171552_159121596_ccs	1	3017	3089	Ser	GCT	0	0	-28.26
m64111_201213_171552_159121596_ccs	2	2688	2616	Asn	GTT	0	0	-23.84
m64111_201213_171552_159252576_ccs	1	2274	2346	Asp	ATC	0	0	-31.52
m64111_201213_171552_159254087_ccs	1	2577	2647	Val	TAC	0	0	-29.64
m64111_201213_171552_159320167_ccs01	1	211	283	Ser	GCT	0	0	-28.26
m64111_201213_171552_159320167_ccs01	2	619	547	Lys	CTT	0	0	-30.88
m64111_201213_171552_159646659_ccs	1	483	411	Ser	GCT	0	0	-28.26
m64111_201213_171552_159711232_ccs0	1	431	502	Val	AAC	0	0	-22.63
m64111_201213_171552_159711232_ccs01	1	7	78	Val	AAC	0	0	-22.63
m64111_201213_171552_159712110_ccs	1	6058	6130	Ser	GCT	0	0	-26.14
m64111_201213_171552_160039442_ccs	1	5101	5173	Ser	GCT	0	0	-28.26
m64111_201213_171552_160432221_ccs	1	1869	1941	Ser	GCT	0	0	-28.3
m64111_201213_171552_160565524_ccs	1	3380	3308	Gly	TCC	0	0	-30.22
m64111_201213_171552_160696803_ccs0	1	2090	2018	Ser	GCT	0	0	-27.92
m64111_201213_171552_160696803_ccs01	1	407	335	Ser	GCT	0	0	-27.92
m64111_201213_171552_160827063_ccs	1	4873	4801	Arg	TCT	0	0	-31.52
m64111_201213_171552_160827341_ccs	1	163	91	Ser	GCT	0	0	-21.76
m64111_201213_171552_161940125_ccs	1	1080	1152	Ile	GAT	0	0	-28.26
m64111_201213_171552_161940830_ccs	1	5346	5275	Ala	AGC	0	0	-24.31
m64111_201213_171552_161940830_ccs	2	3526	3455	Met	CAT	0	0	-27.4
m64111_201213_171552_161941842_ccs01	1	2996	3069	Ser	GCT	0	0	-30.71
m64111_201213_171552_162857088_ccs	1	6684	6612	Gly	TCC	0	0	-28.05
m64111_201213_171552_162857088_ccs	2	4682	4610	Ile	GAT	0	0	-30.05
m64111_201213_171552_162857088_ccs	3	4207	4135	Asn	GTT	0	0	-28.82
m64111_201213_171552_51317074_ccs	1	674	602	Asn	GTT	0	0	-28.95
m64111_201213_171552_51577474_ccs	1	1457	1386	Thr	AGT	0	0	-30.83
m64111_201213_171552_162922742_ccs	1	2755	2827	Ser	ACT	0	0	-29.56
m64111_201213_171552_162922742_ccs	2	4875	4947	Ser	ACT	0	0	-28.26
m64111_201213_171552_162988756_ccs	1	37	118	Ser	ACT	0	0	-28.6
m64111_201213_171552_162988756_ccs	2	3307	3379	Ser	GCT	0	0	-28.45
m64111_201213_171552_163054533_ccs0	1	431	503	Ala	AGC	0	0	-29.67
m64111_201213_171552_163054533_ccs01	1	89	161	Ala	AGC	0	0	-29.67
m64111_201213_171552_163119295_ccs	1	14549	14479	Ser	TGA	0	0	-29.73
m64111_201213_171552_163119295_ccs	2	11449	11379	Gln	TTG	0	0	-29.06
m64111_201213_171552_163120816_ccs	1	6212	6143	Arg	TCT	0	0	-26.14
m64111_201213_171552_163185660_ccs	1	6840	6911	Lys	CTT	0	0	-28.1
m64111_201213_171552_163185660_ccs	2	5755	5684	Gly	TCC	0	0	-25.25
m64111_201213_171552_163317916_ccs	1	266	338	Asn	GTT	0	0	-25.04
m64111_201213_171552_163446795_ccs	1	7088	7016	Ser	ACT	0	0	-28.26
m64111_201213_171552_163514175_ccs	1	7048	7120	Lys	CTT	0	0	-26.25
m64111_201213_171552_163776001_ccs	1	762	690	Ser	GCT	0	0	-28.26
m64111_201213_171552_164234414_ccs	1	2156	2228	Ser	GCT	0	0	-23.37
m64111_201213_171552_164234853_ccs	1	5280	5208	Asn	GTT	0	0	-26.56
m64111_201213_171552_164365019_ccs	1	3054	2983	Ser	GCT	0	0	-28.47
m64111_201213_171552_164627734_ccs	1	1385	1456	Ser	GGA	0	0	-21.06
m64111_201213_171552_164954118_ccs01	1	474	402	Ser	GCT	0	0	-27.57
m64111_201213_171552_164956838_ccs	1	2002	2074	Ser	GCT	0	0	-28.32
m64111_201213_171552_165086854_ccs	1	4770	4696	Ala	TGC	0	0	-30.98
m64111_201213_171552_165150998_ccs	1	657	585	Ser	ACT	0	0	-25.73
m64111_201213_171552_165611694_ccs	1	4515	4587	Lys	CTT	0	0	-28.26
m64111_201213_171552_166070620_ccs	1	4488	4558	Gly	TCC	0	0	-25
m64111_201213_171552_166201163_ccs	1	4415	4344	Gly	TCC	0	0	-29.19
m64111_201213_171552_166464324_ccs	1	3814	3886	Lys	CTT	0	0	-31.51
m64111_201213_171552_51905718_ccs	1	3620	3691	Ser	GCT	0	0	-28.26
m64111_201213_171552_167117490_ccs	1	4340	4413	Ser	ACT	0	0	-28.4
m64111_201213_171552_167117490_ccs	2	6738	6666	Gly	TCC	0	0	-25.75
m64111_201213_171552_167117490_ccs	3	2205	2130	Ala	GGC	0	0	-22.18
m64111_201213_171552_167248331_ccs	1	4241	4168	Ser	GCT	0	0	-29.28
m64111_201213_171552_167249517_ccs	1	3415	3343	Asn	GTT	0	0	-30.53
m64111_201213_171552_167641663_ccs	1	4020	3948	Gly	GCC	0	0	-27.68
m64111_201213_171552_167642286_ccs	1	4208	4136	Lys	CTT	0	0	-28.14
m64111_201213_171552_167642286_ccs	2	2403	2333	Trp	CCA	0	0	-30.76
m64111_201213_171552_167642286_ccs	3	430	358	Ser	GCT	0	0	-28.26
m64111_201213_171552_168035930_ccs	1	5668	5740	Asn	GTT	0	0	-25.45
m64111_201213_171552_168100876_ccs0	1	1628	1700	Arg	CCT	0	0	-21.92
m64111_201213_171552_168101420_ccs	1	5913	5841	Ile	GAT	0	0	-22.87
m64111_201213_171552_168297461_ccs	1	2733	2805	Lys	CTT	0	0	-28.66
m64111_201213_171552_168297461_ccs	2	3304	3376	Asn	GTT	0	0	-26.65
m64111_201213_171552_168690218_ccs	1	4123	4194	Trp	CCA	0	0	-31.73
m64111_201213_171552_169084237_ccs	1	402	474	Ser	GCT	0	0	-28.26
m64111_201213_171552_169084237_ccs	2	810	738	Lys	CTT	0	0	-30.88
m64111_201213_171552_169280049_ccs	1	1308	1236	Lys	CTT	0	0	-26.25
m64111_201213_171552_169673960_ccs0101	1	863	791	Ile	GAT	0	0	-28.6
m64111_201213_171552_169806289_ccs	1	6217	6288	Asp	GTC	0	0	-27.43
m64111_201213_171552_169871724_ccs0	1	854	926	Lys	CTT	0	0	-26.78
m64111_201213_171552_169937713_ccs	1	1252	1177	Thr	GGT	0	0	-26.65
m64111_201213_171552_170001610_ccs	1	1168	1096	Lys	CTT	0	0	-29.64
m64111_201213_171552_170133355_ccs	1	1495	1567	Ser	GCT	0	0	-28.26
m64111_201213_171552_170198075_ccs	1	799	729	Arg	TCT	0	0	-31.51
m64111_201213_171552_170329565_ccs	1	2707	2777	Gln	TTG	0	0	-29.06
m64111_201213_171552_170329565_ccs	2	9442	9372	Ser	TGA	0	0	-29.73
m64111_201213_171552_170525618_ccs	1	6762	6834	Ser	GCT	0	0	-29.78
m64111_201213_171552_170591376_ccs	1	291	219	Ser	GCT	0	0	-26.82
m64111_201213_171552_170787434_ccs	1	764	834	Cys	GCA	0	0	-29.72
m64111_201213_171552_51970600_ccs	1	1752	1824	Arg	TCT	0	0	-28.91
m64111_201213_171552_51970600_ccs	2	428	357	Ser	GCT	0	0	-22.87
m64111_201213_171552_52035889_ccs	1	3540	3612	Glu	CTC	0	0	-30.91
m64111_201213_171552_52035889_ccs	2	4081	4153	Asn	GTT	0	0	-25.04
m64111_201213_171552_52102059_ccs	1	1602	1530	Arg	TCT	0	0	-29.66
m64111_201213_171552_52102873_ccs	1	2735	2807	Asn	GTT	0	0	-22.86
m64111_201213_171552_52102873_ccs	2	6201	6273	Ser	GCT	0	0	-28.26
m64111_201213_171552_52102873_ccs	3	1219	1148	Gly	CCC	0	0	-31.73
m64111_201213_171552_52103477_ccs	1	906	834	Ser	GCT	0	0	-28.67
m64111_201213_171552_52235045_ccs	1	9949	10021	Ser	GCT	0	0	-28.26
m64111_201213_171552_171182001_ccs0	1	638	566	Lys	CTT	0	0	-22.87
m64111_201213_171552_171705295_ccs	1	1065	1135	Ser	TGA	0	0	-29.73
m64111_201213_171552_171705295_ccs	2	4164	4234	Gln	TTG	0	0	-29.06
m64111_201213_171552_171705392_ccs	1	78	6	Gly	ACC	0	0	-30.39
m64111_201213_171552_171902544_ccs	1	830	905	Ser	GCT	0	0	-26.49
m64111_201213_171552_171903250_ccs	1	2561	2632	Ser	GCT	0	0	-22.12
m64111_201213_171552_172165261_ccs0	1	908	836	Asn	GTT	0	0	-28.26
m64111_201213_171552_172294757_ccs	1	5500	5428	Thr	TGT	0	0	-28.97
m64111_201213_171552_172296481_ccs	1	6600	6528	Ser	GCT	0	0	-28.26
m64111_201213_171552_172818829_ccs	1	2387	2457	Gln	TTG	0	0	-29.06
m64111_201213_171552_172818982_ccs	1	7609	7537	Ser	GCT	0	0	-28.21
m64111_201213_171552_173016975_ccs	1	1943	2014	His	ATG	0	0	-27.25
m64111_201213_171552_173016975_ccs	2	5758	5686	Ser	GCT	0	0	-30.76
m64111_201213_171552_173081674_ccs	1	8141	8071	Ala	AGC	0	0	-28.25
m64111_201213_171552_173344671_ccs	1	770	842	Ser	GCT	0	0	-28.26
m64111_201213_171552_173410420_ccs	1	5282	5212	Gln	TTG	0	0	-29.06
m64111_201213_171552_173868159_ccs0	1	432	504	Ala	AGC	0	0	-28.16
m64111_201213_171552_173868159_ccs01	1	2852	2924	Ala	AGC	0	0	-28.16
m64111_201213_171552_173869150_ccs	1	2499	2429	***	TCA	0	0	-29.77
m64111_201213_171552_173869150_ccs	2	73	1	Tyr	ATA	0	0	-30.11
m64111_201213_171552_174064108_ccs	1	2099	2027	Gly	ACC	0	0	-31.02
m64111_201213_171552_174131474_ccs	1	4503	4575	Val	CAC	0	0	-29.22
m64111_201213_171552_174194868_ccs	1	1175	1247	Ser	GCT	0	0	-31.04
m64111_201213_171552_174197058_ccs0	1	3357	3285	Ser	GCT	0	0	-28.52
m64111_201213_171552_174197058_ccs01	1	2329	2257	Ser	GCT	0	0	-28.52
m64111_201213_171552_174262484_ccs	1	4592	4664	Ser	GCT	0	0	-28.95
m64111_201213_171552_52365574_ccs	1	1410	1338	Ser	GCT	0	0	-25.04
m64111_201213_171552_52560194_ccs	1	5259	5331	Ser	GCT	0	0	-31.3
m64111_201213_171552_174394049_ccs	1	708	780	Ser	GCT	0	0	-24.72
m64111_201213_171552_174982489_ccs	1	1502	1574	Lys	CTT	0	0	-26.65
m64111_201213_171552_174982489_ccs	2	4603	4675	Ser	GCT	0	0	-28.26
m64111_201213_171552_174982489_ccs	3	4792	4863	Leu	GAG	0	0	-31.26
m64111_201213_171552_175178135_ccs	1	6413	6562	Val	TAC	0	0	-29.33
m64111_201213_171552_175374689_ccs	1	7433	7505	Ser	GCT	0	0	-28.26
m64111_201213_171552_175636869_ccs	1	1852	1780	Ser	GCT	0	0	-28.99
m64111_201213_171552_175702936_ccs	1	1332	1404	Asn	GTT	0	0	-28.43
m64111_201213_171552_175835849_ccs	1	638	817	Ala	GGC	0	0	-26.03
m64111_201213_171552_175835849_ccs	2	1809	1881	Asn	GTT	0	0	-27.82
m64111_201213_171552_175899270_ccs	1	2273	2201	Ser	GCT	0	0	-28.26
m64111_201213_171552_176227208_ccs	1	252	324	Ser	GCT	0	0	-22.12
m64111_201213_171552_176293105_ccs	1	5707	5779	Ser	GCT	0	0	-28.26
m64111_201213_171552_177144157_ccs	1	5196	5125	Ala	AGC	0	0	-24.92
m64111_201213_171552_177341156_ccs	1	317	245	Asn	GTT	0	0	-31.49
m64111_201213_171552_177342856_ccs	1	2643	2571	Thr	GGT	0	0	-25.74
m64111_201213_171552_177471494_ccs	1	134	206	Ser	GCT	0	0	-27.78
m64111_201213_171552_177471924_ccs	1	2979	2908	Ala	AGC	0	0	-24.06
m64111_201213_171552_52691016_ccs	1	4417	4345	Ser	GCT	0	0	-28.26
m64111_201213_171552_52822447_ccs	1	1499	1427	Asn	GTT	0	0	-28.26
m64111_201213_171552_52888359_ccs	1	1450	1522	Gln	CTG	0	0	-26.63
m64111_201213_171552_52888359_ccs	2	2497	2425	***	TTA	0	0	-30.32
m64111_201213_171552_722510_ccs	1	1723	1651	Asn	ATT	0	0	-28.26
m64111_201213_171552_722749_ccs	1	5421	5493	Gly	GCC	0	0	-28.11
m64111_201213_171552_853368_ccs00	1	741	669	Ser	GCT	0	0	-28.3
m64111_201213_171552_178062990_ccs	1	889	961	Asn	GTT	0	0	-29.92
m64111_201213_171552_178127255_ccs	1	3846	3774	Asn	GTT	0	0	-30.78
m64111_201213_171552_178325823_ccs	1	637	709	Ser	GCT	0	0	-29.37
m64111_201213_171552_178522343_ccs	1	20	96	Gln	TTG	0	0	-27.43
m64111_201213_171552_178719042_ccs	1	410	482	Ala	AGC	0	0	-27.39
m64111_201213_171552_179112117_ccs	1	822	894	Ser	GCT	0	0	-19.61
m64111_201213_171552_179112117_ccs	2	365	293	Ser	GCT	0	0	-29.52
m64111_201213_171552_179438976_ccs	1	2779	2707	Ala	AGC	0	0	-31.02
m64111_201213_171552_179438976_ccs	2	918	846	Ser	GCT	0	0	-28.66
m64111_201213_171552_179439070_ccs	1	511	583	Ser	ACT	0	0	-27.06
m64111_201213_171552_179439986_ccs	1	2687	2615	Val	TAC	0	0	-28.19
m64111_201213_171552_179766354_ccs	1	1486	1414	Asn	GTT	0	0	-25.26
m64111_201213_171552_180028047_ccs	1	1017	1087	Ser	TGA	0	0	-29.73
m64111_201213_171552_180291207_ccs	1	10172	10244	Ser	GCT	0	0	-23.37
m64111_201213_171552_180291207_ccs	2	588	516	Ser	GCT	0	0	-27.52
m64111_201213_171552_180356887_ccs	1	1550	1621	Lys	CTT	0	0	-24.67
m64111_201213_171552_180421574_ccs01	1	352	280	Ser	GCT	0	0	-28.26
m64111_201213_171552_180422252_ccs	1	2342	2414	Ser	GCT	0	0	-26.34
m64111_201213_171552_180486832_ccs0	1	333	261	Ser	GCT	0	0	-25.04
m64111_201213_171552_180486832_ccs010	1	209	137	Ser	GCT	0	0	-25.04
m64111_201213_171552_180486832_ccs0101	1	886	814	Lys	CTT	0	0	-25.04
m64111_201213_171552_13108112_ccs	1	1539	1615	Ser	ACT	0	0	-28.71
m64111_201213_171552_13108112_ccs	2	3633	3705	Gln	CTG	0	0	-25.9
m64111_201213_171552_13108803_ccs0	1	448	377	Ser	GCT	0	0	-29.02
m64111_201213_171552_13108803_ccs010	1	243	172	Ser	GCT	0	0	-29.02
m64111_201213_171552_13108803_ccs0101	1	1297	1226	Ser	GCT	0	0	-29.02
m64111_201213_171552_13109161_ccs	1	67	1	Ala	AGC	0	0	-31.23
m64111_201213_171552_13241180_ccs	1	4609	4681	Ser	GCT	0	0	-29.1
m64111_201213_171552_53282315_ccs	1	2262	2190	Ser	GCT	0	0	-28.26
m64111_201213_171552_13698088_ccs	1	4440	4512	Gly	GCC	0	0	-20.78
m64111_201213_171552_13698088_ccs	2	4214	4142	Ser	GCT	0	0	-22.86
m64111_201213_171552_13698088_ccs	3	560	485	Cys	GCA	0	0	-28.53
m64111_201213_171552_13762952_ccs	1	1508	1580	Ser	GCT	0	0	-24.57
m64111_201213_171552_13829487_ccs	1	1602	1674	Ser	GCT	0	0	-28.26
m64111_201213_171552_14156977_ccs0	1	249	179	***	TCA	0	0	-29.77
m64111_201213_171552_14156977_ccs01	1	1971	1901	***	TCA	0	0	-29.77
m64111_201213_171552_14157910_ccs	1	926	998	Ser	GCT	0	0	-28.86
m64111_201213_171552_14287539_ccs	1	214	286	Ser	GCT	0	0	-23.65
m64111_201213_171552_14353468_ccs	1	2517	2447	Gly	TCC	0	0	-26.11
m64111_201213_171552_14615009_ccs	1	1349	1421	Ser	GCT	0	0	-28.26
m64111_201213_171552_14877055_ccs	1	273	202	Ser	GCT	0	0	-29.02
m64111_201213_171552_15009181_ccs	1	3134	3064	Gln	TTG	0	0	-29.06
m64111_201213_171552_15074602_ccs	1	2847	2775	Gly	ACC	0	0	-31.62
m64111_201213_171552_15532828_ccs	1	1176	1248	Ile	AAT	0	0	-27.73
m64111_201213_171552_15925767_ccs	1	2322	2251	Trp	CCA	0	0	-27.81
m64111_201213_171552_15927481_ccs	1	983	913	Leu	TAG	0	0	-28.78
m64111_201213_171552_16057017_ccs	1	582	654	Lys	CTT	0	0	-26.08
m64111_201213_171552_16188109_ccs	1	2133	2205	Ser	GCT	0	0	-28.26
m64111_201213_171552_16385021_ccs	1	1681	1609	Lys	CTT	0	0	-27.1
m64111_201213_171552_16517448_ccs	1	281	353	Asn	GTT	0	0	-25.04
m64111_201213_171552_16583084_ccs	1	481	553	Val	TAC	0	0	-28.19
m64111_201213_171552_16777777_ccs	1	412	485	Ile	AAT	0	0	-15.73
m64111_201213_171552_16777777_ccs	2	2374	2445	Ala	CGC	0	0	-27.58
m64111_201213_171552_16780119_ccs	1	251	179	Asn	GTT	0	0	-29.01
m64111_201213_171552_16975055_ccs	1	857	785	Ser	GCT	0	0	-22.86
m64111_201213_171552_16975875_ccs	1	4525	4597	Ser	GCT	0	0	-25
m64111_201213_171552_16976193_ccs	1	1441	1369	Ser	GCT	0	0	-31.14
m64111_201213_171552_53543087_ccs	1	1087	1159	Ser	GCT	0	0	-30.31
m64111_201213_171552_53544932_ccs01	1	503	575	Ser	GCT	0	0	-31.47
m64111_201213_171552_17171340_ccs	1	1828	1757	Ser	GCT	0	0	-29.63
m64111_201213_171552_17171376_ccs0	1	1080	1152	Ser	GCT	0	0	-28.26
m64111_201213_171552_17171376_ccs01	1	133	205	Ser	GCT	0	0	-28.26
m64111_201213_171552_17171715_ccs	1	6992	7063	Ala	AGC	0	0	-26.32
m64111_201213_171552_17499863_ccs	1	3421	3502	Gln	CTG	0	0	-29.63
m64111_201213_171552_17565069_ccs	1	2805	2878	Gly	GCC	0	0	-29.75
m64111_201213_171552_17629674_ccs	1	1070	1142	Ala	AGC	0	0	-21.73
m64111_201213_171552_17761543_ccs	1	1867	1795	Ser	GCT	0	0	-24.72
m64111_201213_171552_18089688_ccs	1	1899	1971	Ser	GCT	0	0	-29.1
m64111_201213_171552_18090781_ccs	1	4777	4705	Ser	GCT	0	0	-31.54
m64111_201213_171552_18220004_ccs	1	1127	1197	Ala	TGC	0	0	-29.43
m64111_201213_171552_18285733_ccs	1	4154	4069	Ser	GCT	0	0	-30.01
m64111_201213_171552_18286082_ccs	1	1429	1357	Lys	CTT	0	0	-29.69
m64111_201213_171552_18484048_ccs	1	463	360	***	TCA	0	0	-29.37
m64111_201213_171552_18613809_ccs	1	11116	11188	Ser	GCT	0	0	-22.86
m64111_201213_171552_18678464_ccs	1	2284	2356	Ser	GCT	0	0	-28.26
m64111_201213_171552_18678464_ccs	2	4858	4786	Arg	TCT	0	0	-28.66
m64111_201213_171552_19138521_ccs	1	3356	3428	Ser	GCT	0	0	-29.32
m64111_201213_171552_19464818_ccs	1	551	623	Ser	GCT	0	0	-30.33
m64111_201213_171552_19466201_ccs	1	5967	5897	Gln	TTG	0	0	-29.06
m64111_201213_171552_19530236_ccs	1	205	133	Ser	GCT	0	0	-20.15
m64111_201213_171552_19728031_ccs	1	675	747	Ser	GCT	0	0	-28.67
m64111_201213_171552_19793585_ccs	1	920	991	Gly	ACC	0	0	-30.69
m64111_201213_171552_19793733_ccs	1	54	126	Ser	GCT	0	0	-24.99
m64111_201213_171552_19989700_ccs0	1	1155	1227	Ser	GCT	0	0	-30.22
m64111_201213_171552_19989700_ccs01	1	237	309	Ser	GCT	0	0	-30.22
m64111_201213_171552_20186688_ccs	1	2850	2775	Ser	GCT	0	0	-29.63
m64111_201213_171552_20187637_ccs	1	4251	4180	Asn	ATT	0	0	-30.32
m64111_201213_171552_20318131_ccs01	1	902	974	Leu	CAG	0	0	-29.25
m64111_201213_171552_20447266_ccs	1	1376	1447	Val	AAC	0	0	-31.19
m64111_201213_171552_20514756_ccs	1	6299	6371	Asn	GTT	0	0	-23.13
m64111_201213_171552_20515153_ccs	1	3698	3626	Lys	CTT	0	0	-27.11
m64111_201213_171552_20579951_ccs	1	35	106	Gln	CTG	0	0	-28.99
m64111_201213_171552_20645130_ccs	1	1530	1458	Ser	GCT	0	0	-26.14
m64111_201213_171552_20645130_ccs	2	652	581	Ala	AGC	0	0	-29.62
m64111_201213_171552_20710247_ccs	1	3655	3583	Lys	CTT	0	0	-26.84
m64111_201213_171552_21039511_ccs	1	4903	4973	Ser	TGA	0	0	-29.73
m64111_201213_171552_21168164_ccs	1	3411	3483	Ser	GCT	0	0	-28.48
m64111_201213_171552_21364844_ccs	1	2469	2541	Lys	CTT	0	0	-28.26
m64111_201213_171552_21366733_ccs	1	2273	2201	Ser	GCT	0	0	-22.12
m64111_201213_171552_21496760_ccs	1	561	633	Ser	GCT	0	0	-24.58
m64111_201213_171552_21496760_ccs	2	4892	4821	Asn	GTT	0	0	-24.7
m64111_201213_171552_21693848_ccs	1	6373	6444	Lys	TTT	0	0	-30.48
m64111_201213_171552_22217707_ccs	1	5678	5606	Lys	CTT	0	0	-31.58
m64111_201213_171552_22415838_ccs	1	339	267	Ser	GCT	0	0	-28.3
m64111_201213_171552_22546040_ccs	1	5471	5543	Arg	CCT	0	0	-29.45
m64111_201213_171552_22873561_ccs	1	258	186	Ser	GCT	0	0	-28.26
m64111_201213_171552_23070702_ccs	1	110	182	Ser	GCT	0	0	-28.26
m64111_201213_171552_23462466_ccs	1	927	999	Asn	GTT	0	0	-24.25
m64111_201213_171552_23462990_ccs	1	1004	1076	Val	TAC	0	0	-30.05
m64111_201213_171552_23660100_ccs	1	5268	5193	Leu	TAG	0	0	-24.52
m64111_201213_171552_23790325_ccs	1	1372	1444	Ser	GCT	0	0	-28.61
m64111_201213_171552_54199114_ccs	1	4247	4318	Val	CAC	0	0	-26.73
m64111_201213_171552_24250580_ccs	1	788	860	Asn	GTT	0	0	-28.26
m64111_201213_171552_25166454_ccs	1	3266	3194	Asn	GTT	0	0	-22.92
m64111_201213_171552_25166726_ccs	1	9994	9922	Ser	GCT	0	0	-28.82
m64111_201213_171552_25428372_ccs	1	427	498	Thr	AGT	0	0	-27.55
m64111_201213_171552_25627156_ccs	1	5120	5050	Ser	TGA	0	0	-29.73
m64111_201213_171552_25757002_ccs	1	3523	3451	Ser	GCT	0	0	-28.26
m64111_201213_171552_26086071_ccs	1	4905	4834	Ala	AGC	0	0	-21.73
m64111_201213_171552_26413829_ccs	1	3404	3332	Ser	GCT	0	0	-28.48
m64111_201213_171552_26675939_ccs	1	1812	1884	Ser	GCT	0	0	-22.86
m64111_201213_171552_26675939_ccs	2	2258	2330	Val	AAC	0	0	-23.92
m64111_201213_171552_27066938_ccs	1	6325	6467	Gly	ACC	0	0	-29.57
m64111_201213_171552_27263321_ccs	1	571	498	Ser	GCT	0	0	-31.39
m64111_201213_171552_54396978_ccs	1	4546	4618	Ser	GCT	0	0	-25.34
m64111_201213_171552_54527852_ccs	1	3531	3459	Ser	GCT	0	0	-25.04
m64111_201213_171552_54527852_ccs	2	2755	2683	Ser	GCT	0	0	-26.65
m64111_201213_171552_27329938_ccs	1	801	873	Gly	TCC	0	0	-28.73
m64111_201213_171552_27658963_ccs	1	641	713	Gly	TCC	0	0	-25.75
m64111_201213_171552_27658963_ccs	2	2469	2541	Asn	GTT	0	0	-26.65
m64111_201213_171552_27658963_ccs	3	3559	3487	Ser	GCT	0	0	-28.26
m64111_201213_171552_27723785_ccs	1	7431	7513	Leu	AAG	0	0	-20.52
m64111_201213_171552_27723785_ccs	2	4265	4183	Leu	CAG	0	0	-20.52
m64111_201213_171552_27723785_ccs	3	3374	3304	Gly	GCC	0	0	-19.93
m64111_201213_171552_27724141_ccs	1	3002	3072	Ser	TGA	0	0	-29.73
m64111_201213_171552_27724141_ccs	2	6102	6172	Gln	TTG	0	0	-29.06
m64111_201213_171552_27854596_ccs	1	5272	5344	Ser	GCT	0	0	-30.33
m64111_201213_171552_27854596_ccs	2	3602	3530	Ser	GCT	0	0	-28.26
m64111_201213_171552_27986701_ccs	1	1441	1372	Ile	AAT	0	0	-24.6
m64111_201213_171552_28052270_ccs	1	8651	8581	Ser	TGA	0	0	-31.52
m64111_201213_171552_28052270_ccs	2	5550	5480	Gln	TTG	0	0	-29.06
m64111_201213_171552_28247867_ccs	1	6880	6808	Ser	GCT	0	0	-28.26
m64111_201213_171552_28311790_ccs0	1	257	329	Ser	GCT	0	0	-21.02
m64111_201213_171552_28311790_ccs01	1	1893	1965	Ser	GCT	0	0	-18.82
m64111_201213_171552_28312922_ccs	1	2177	2105	Ser	GCT	0	0	-27.85
m64111_201213_171552_28314294_ccs	1	19	92	Arg	CCT	0	0	-27.57
m64111_201213_171552_28378270_ccs	1	331	260	Gly	TCC	0	0	-30
m64111_201213_171552_28443761_ccs0	1	1429	1516	Met	CAT	0	0	-27.05
m64111_201213_171552_28575836_ccs	1	1170	1242	Gly	ACC	0	0	-31.02
m64111_201213_171552_28640218_ccs	1	5207	5135	Ser	GCT	0	0	-28.09
m64111_201213_171552_28706642_ccs	1	9813	9741	Lys	CTT	0	0	-30.08
m64111_201213_171552_28706642_ccs	2	8246	8175	Val	AAC	0	0	-30.98
m64111_201213_171552_28707656_ccs	1	9610	9680	Ser	TGA	0	0	-29.73
m64111_201213_171552_28707656_ccs	2	12709	12779	Gln	TTG	0	0	-29.06
m64111_201213_171552_28836249_ccs	1	2921	2993	Tyr	GTA	0	0	-28.63
m64111_201213_171552_28836249_ccs	2	2184	2110	Ala	AGC	0	0	-22.23
m64111_201213_171552_28836598_ccs0	1	66	1	Asn	GTT	0	0	-26.11
m64111_201213_171552_29032484_ccs	1	2760	2834	Asp	GTC	0	0	-29.37
m64111_201213_171552_29033683_ccs	1	3145	3073	Ser	GCT	0	0	-26.06
m64111_201213_171552_29165458_ccs	1	2720	2790	Ser	GGA	0	0	-18.7
m64111_201213_171552_29165458_ccs	2	3098	3026	Ser	GCT	0	0	-29.36
m64111_201213_171552_29690160_ccs	1	126	54	Lys	CTT	0	0	-30.77
m64111_201213_171552_29819347_ccs	1	2334	2405	Val	AAC	0	0	-29.46
m64111_201213_171552_29819347_ccs	2	5656	5728	Ser	GCT	0	0	-28.26
m64111_201213_171552_29951644_ccs	1	5432	5504	Ser	GCT	0	0	-31.74
m64111_201213_171552_30081813_ccs	1	3572	3500	Ser	GCT	0	0	-25.04
m64111_201213_171552_30148305_ccs	1	2351	2421	Gln	TTG	0	0	-29.06
m64111_201213_171552_30148305_ccs	2	3459	3389	Ser	TGA	0	0	-29.73
m64111_201213_171552_30277774_ccs	1	2680	2752	Ser	GCT	0	0	-31.03
m64111_201213_171552_30475673_ccs	1	3165	3093	Ser	GCT	0	0	-27.92
m64111_201213_171552_54854020_ccs	1	3146	3074	Ser	ACT	0	0	-30.47
m64111_201213_171552_54855608_ccs	1	768	696	Lys	CTT	0	0	-27.2
m64111_201213_171552_54985196_ccs	1	10619	10547	Ser	GCT	0	0	-28.26
m64111_201213_171552_54985196_ccs	2	8890	8818	Ser	GCT	0	0	-26.09
m64111_201213_171552_55050956_ccs	1	3555	3626	***	TTA	0	0	-30.82
m64111_201213_171552_55182654_ccs	1	546	474	Asn	GTT	0	0	-28.26
m64111_201213_171552_30803667_ccs	1	7597	7525	Asn	GTT	0	0	-26.65
m64111_201213_171552_30869995_ccs0	1	57	129	Lys	CTT	0	0	-28.95
m64111_201213_171552_30869995_ccs01	1	575	647	Lys	CTT	0	0	-28.95
m64111_201213_171552_30999906_ccs	1	5335	5263	Ala	GGC	0	0	-30.1
m64111_201213_171552_30999906_ccs	2	1097	1026	Val	CAC	0	0	-30.84
m64111_201213_171552_31261754_ccs	1	1404	1476	Ala	AGC	0	0	-29.39
m64111_201213_171552_31328770_ccs	1	2173	2243	Ser	TGA	0	0	-29.73
m64111_201213_171552_31328770_ccs	2	5115	5045	Gln	TTG	0	0	-29.06
m64111_201213_171552_31393157_ccs	1	1071	1143	Lys	CTT	0	0	-30.88
m64111_201213_171552_31393157_ccs	2	1479	1407	Ser	GCT	0	0	-28.26
m64111_201213_171552_31523897_ccs	1	6052	5982	Gln	TTG	0	0	-29.06
m64111_201213_171552_31656056_ccs	1	1122	1195	Ala	AGC	0	0	-23.62
m64111_201213_171552_31786449_ccs	1	5531	5603	Ser	GCT	0	0	-23.54
m64111_201213_171552_31916371_ccs	1	197	124	Ser	GCT	0	0	-28.08
m64111_201213_171552_31981828_ccs0	1	69	1	Cys	ACA	0	0	-23.07
m64111_201213_171552_31982111_ccs	1	151	82	Val	TAC	0	0	-31.13
m64111_201213_171552_32311271_ccs	1	2413	2483	Cys	GCA	0	0	-29.72
m64111_201213_171552_32375571_ccs	1	4847	4919	Ser	GCT	0	0	-27.77
m64111_201213_171552_32376164_ccs	1	1819	1891	Asn	GTT	0	0	-28.01
m64111_201213_171552_32376775_ccs01	1	261	333	Lys	CTT	0	0	-24.21
m64111_201213_171552_32507144_ccs	1	1270	1342	Asn	GTT	0	0	-25.04
m64111_201213_171552_32966136_ccs	1	220	148	Ser	GCT	0	0	-28.26
m64111_201213_171552_33161294_ccs	1	4228	4300	Ser	GCT	0	0	-28.26
m64111_201213_171552_33161294_ccs	2	1252	1180	Ser	GCT	0	0	-23.08
m64111_201213_171552_33556559_ccs	1	1435	1363	Asn	GTT	0	0	-28.26
m64111_201213_171552_33556559_ccs	2	1149	1077	Asn	GTT	0	0	-23.84
m64111_201213_171552_33556559_ccs	3	736	664	Ser	GCT	0	0	-30.77
m64111_201213_171552_33556734_ccs	1	3893	3965	Arg	TCT	0	0	-25.86
m64111_201213_171552_33687178_ccs	1	4517	4589	Ser	GCT	0	0	-24.51
m64111_201213_171552_33882490_ccs	1	584	512	Ser	GCT	0	0	-28.26
m64111_201213_171552_34081468_ccs0	1	131	202	Asn	GTT	0	0	-29.12
m64111_201213_171552_34081468_ccs01	1	2092	2163	Asn	GTT	0	0	-29.12
m64111_201213_171552_34146446_ccs	1	175	103	Ser	GCT	0	0	-23.37
m64111_201213_171552_34276140_ccs	1	5845	5917	Ser	GCT	0	0	-29.78
m64111_201213_171552_34276692_ccs	1	381	309	Arg	TCT	0	0	-28.26
m64111_201213_171552_34472036_ccs	1	1589	1661	Asn	GTT	0	0	-28.01
m64111_201213_171552_34604711_ccs0	1	443	515	Ser	GCT	0	0	-20.67
m64111_201213_171552_34604711_ccs01	1	165	237	Ser	GCT	0	0	-25.56
m64111_201213_171552_34669120_ccs	1	3143	3215	Ser	ACT	0	0	-31.79
m64111_201213_171552_34670554_ccs	1	1964	2034	Ser	TGA	0	0	-29.73
m64111_201213_171552_34670554_ccs	2	5062	5132	Gln	TTG	0	0	-29.06
m64111_201213_171552_34802383_ccs	1	275	347	Ser	GCT	0	0	-28.26
m64111_201213_171552_34931036_ccs	1	813	883	Gln	TTG	0	0	-29.06
m64111_201213_171552_35128645_ccs	1	7864	7936	Lys	TTT	0	0	-23.81
m64111_201213_171552_35129836_ccs	1	3834	3906	Ser	GCT	0	0	-28.26
m64111_201213_171552_35129836_ccs	2	6507	6579	Ser	GCT	0	0	-28.95
m64111_201213_171552_35129836_ccs	3	17742	17670	Gly	ACC	0	0	-28.66
m64111_201213_171552_35457133_ccs01	1	757	829	Leu	TAG	0	0	-22.06
m64111_201213_171552_35586062_ccs	1	4238	4166	Ser	GCT	0	0	-31.43
m64111_201213_171552_35586062_ccs	2	2087	2017	Gly	ACC	0	0	-26.5
m64111_201213_171552_35783052_ccs	1	141	70	Phe	GAA	0	0	-25.68
m64111_201213_171552_35785056_ccs	1	1854	1924	Cys	ACA	0	0	-31.77
m64111_201213_171552_35785056_ccs	2	3395	3466	Leu	CAA	0	0	-26.06
m64111_201213_171552_35849075_ccs	1	2487	2562	Gly	GCC	0	0	-29.74
m64111_201213_171552_35850606_ccs	1	625	697	Ser	GCT	0	0	-29.6
m64111_201213_171552_35916625_ccs	1	4233	4305	Leu	TAG	0	0	-28.26
m64111_201213_171552_35916625_ccs	2	6240	6313	Gly	GCC	0	0	-28.26
m64111_201213_171552_36241681_ccs01	1	2535	2607	Arg	GCG	0	0	-27.1
m64111_201213_171552_36374274_ccs	1	6238	6166	Gly	TCC	0	0	-25.75
m64111_201213_171552_36374274_ccs	2	3678	3606	Ser	GCT	0	0	-28.26
m64111_201213_171552_36700318_ccs	1	1865	1795	Ser	TGA	0	0	-29.73
m64111_201213_171552_36963494_ccs	1	1050	1122	Gly	GCC	0	0	-30.96
m64111_201213_171552_37094791_ccs	1	308	380	Ser	GCT	0	0	-25
m64111_201213_171552_37095419_ccs	1	1332	1260	Ser	GCT	0	0	-28.26
m64111_201213_171552_37095632_ccs	1	1651	1723	Ser	GCT	0	0	-26.8
m64111_201213_171552_37225746_ccs0	1	2145	2217	Val	CAC	0	0	-26.57
m64111_201213_171552_37225746_ccs01	1	1716	1788	Val	CAC	0	0	-26.57
m64111_201213_171552_37290006_ccs	1	2418	2489	Ala	TGC	0	0	-21.39
m64111_201213_171552_37290006_ccs	2	1995	1923	Ser	GCT	0	0	-28.26
m64111_201213_171552_37423235_ccs	1	6067	5995	Lys	CTT	0	0	-28.82
m64111_201213_171552_37552779_ccs	1	6959	7031	Ala	AGC	0	0	-23.34
m64111_201213_171552_55577193_ccs	1	4248	4320	Ser	GCT	0	0	-30.77
m64111_201213_171552_55838302_ccs0	1	873	801	Lys	CTT	0	0	-23.03
m64111_201213_171552_55838302_ccs01	1	682	610	Lys	CTT	0	0	-23.03
m64111_201213_171552_38012160_ccs	1	198	269	Ser	GCT	0	0	-18.28
m64111_201213_171552_38012605_ccs	1	1633	1705	Ser	GCT	0	0	-24.72
m64111_201213_171552_38210270_ccs	1	5398	5468	Ser	TGA	0	0	-29.73
m64111_201213_171552_38210270_ccs	2	10743	10673	Gln	TTG	0	0	-29.06
m64111_201213_171552_38338732_ccs	1	1202	1274	Gly	GCC	0	0	-30.08
m64111_201213_171552_38930318_ccs	1	8111	8041	Ser	TGA	0	0	-29.73
m64111_201213_171552_38930318_ccs	2	5012	4942	Gln	TTG	0	0	-29.06
m64111_201213_171552_39125671_ccs	1	329	401	***	CTA	0	0	-27.73
m64111_201213_171552_39127111_ccs	1	1656	1728	Lys	CTT	0	0	-31.16
m64111_201213_171552_39848473_ccs	1	3996	4067	Ala	AGC	0	0	-29.67
m64111_201213_171552_39848579_ccs	1	2154	2226	Ser	GCT	0	0	-28.26
m64111_201213_171552_40042966_ccs	1	1390	1318	Asn	GTT	0	0	-27.06
m64111_201213_171552_40044287_ccs0	1	376	447	Glu	TTC	0	0	-31.41
m64111_201213_171552_40044287_ccs0101	1	1148	1219	Glu	TTC	0	0	-26.51
m64111_201213_171552_40305309_ccs	1	3459	3387	Ser	GCT	0	0	-27.57
m64111_201213_171552_40568899_ccs	1	1044	1114	Ser	TGA	0	0	-29.73
m64111_201213_171552_40633721_ccs00	1	341	269	Asn	GTT	0	0	-28.26
m64111_201213_171552_40831431_ccs	1	1124	953	Ser	AGA	0	0	-31.72
m64111_201213_171552_41287965_ccs	1	12185	12255	Ser	TGA	0	0	-29.73
m64111_201213_171552_41353527_ccs0	1	3944	4016	Asn	GTT	0	0	-23.37
m64111_201213_171552_41353527_ccs01	1	2391	2463	Asn	GTT	0	0	-28.26
m64111_201213_171552_41354856_ccs	1	2474	2402	Ser	GCT	0	0	-27.1
m64111_201213_171552_55968789_ccs	1	1250	1321	Lys	CTT	0	0	-28.87
m64111_201213_171552_56296187_ccs	1	482	554	Ser	GCT	0	0	-26.65
m64111_201213_171552_41945911_ccs	1	2684	2612	Ser	GCT	0	0	-26.86
m64111_201213_171552_42074862_ccs	1	2171	2243	Ser	GCT	0	0	-27.57
m64111_201213_171552_42206401_ccs	1	8610	8538	Asn	GTT	0	0	-31.04
m64111_201213_171552_42598467_ccs	1	3370	3442	Ser	GCT	0	0	-25.34
m64111_201213_171552_42863118_ccs	1	720	792	Gly	GCC	0	0	-25.04
m64111_201213_171552_42927374_ccs	1	1640	1568	Gly	TCC	0	0	-31.66
m64111_201213_171552_43057430_ccs	1	7176	7097	Ala	AGC	0	0	-29.48
m64111_201213_171552_43190235_ccs	1	1138	1066	Gly	TCC	0	0	-25.1
m64111_201213_171552_43190242_ccs	1	4252	4179	Ser	GCT	0	0	-31.78
m64111_201213_171552_43517643_ccs	1	2815	2887	Ser	GCT	0	0	-25.11
m64111_201213_171552_43518332_ccs	1	1457	1385	Thr	GGT	0	0	-25.04
m64111_201213_171552_43909266_ccs	1	4102	4174	Ser	GCT	0	0	-28.26
m64111_201213_171552_44040306_ccs	1	266	194	Ser	GCT	0	0	-29.85
m64111_201213_171552_56493825_ccs	1	2440	2512	Lys	CTT	0	0	-28.26
m64111_201213_171552_984902_ccs	1	2508	2436	Ser	GCT	0	0	-25.04
m64111_201213_171552_56951412_ccs	1	438	510	Ser	GCT	0	0	-28.82
m64111_201213_171552_56951412_ccs	2	1177	1249	Lys	CTT	0	0	-26.83
m64111_201213_171552_57345047_ccs0	1	934	1005	Ala	TGC	0	0	-30.72
m64111_201213_171552_57410294_ccs	1	49	121	Asn	GTT	0	0	-30.48
m64111_201213_171552_57477280_ccs	1	10334	10406	Ser	GCT	0	0	-28.07
m64111_201213_171552_57477280_ccs	2	10823	10894	Ala	AGC	0	0	-25.93
m64111_201213_171552_57477280_ccs	3	861	788	Leu	TAA	0	0	-31.58
m64111_201213_171552_57541754_ccs	1	5559	5635	Ser	GCT	0	0	-31.11
m64111_201213_171552_57541754_ccs	2	5755	5827	Ser	GCT	0	0	-22.38
m64111_201213_171552_57673610_ccs	1	659	587	Ser	GCT	0	0	-30.77
m64111_201213_171552_57934161_ccs	1	1904	1832	Asn	GTT	0	0	-26.64
m64111_201213_171552_58196894_ccs	1	1060	988	Lys	TTT	0	0	-28.26
m64111_201213_171552_58197304_ccs	1	975	1047	Ser	GCT	0	0	-29.4
m64111_201213_171552_58197304_ccs	2	335	263	Ser	GCT	0	0	-28.26
m64111_201213_171552_58392902_ccs	1	138	66	Ser	GCT	0	0	-23.67
m64111_201213_171552_58460978_ccs	1	903	974	Gly	TCC	0	0	-30.58
m64111_201213_171552_58720836_ccs	1	2137	2065	Ser	GCT	0	0	-28.26
m64111_201213_171552_58786956_ccs0	1	1779	1708	Ser	GCT	0	0	-28.26
m64111_201213_171552_58786956_ccs01	1	306	235	Ser	GCT	0	0	-28.26
m64111_201213_171552_59312966_ccs	1	450	378	Lys	CTT	0	0	-25.04
m64111_201213_171552_59441293_ccs	1	189	117	***	TCA	0	0	-27.96
m64111_201213_171552_59900247_ccs	1	2644	2714	Ala	GGC	0	0	-30.58
m64111_201213_171552_59900247_ccs	2	487	415	Ser	GCT	0	0	-28.26
m64111_201213_171552_60163639_ccs	1	1761	1689	Ser	GCT	0	0	-28.26
m64111_201213_171552_1182371_ccs	1	988	916	Ser	GCT	0	0	-28.26
m64111_201213_171552_1377587_ccs	1	483	555	Ser	GCT	0	0	-28.26
m64111_201213_171552_60622259_ccs	1	2173	2271	Ser	GCT	0	0	-30.47
m64111_201213_171552_60687457_ccs	1	3916	3988	Ile	GAT	0	0	-26.33
m64111_201213_171552_60687987_ccs	1	3065	2993	Ser	AGA	0	0	-31.61
m64111_201213_171552_61145826_ccs	1	2396	2468	Asn	GTT	0	0	-26.65
m64111_201213_171552_61145826_ccs	2	4047	4119	Ser	GCT	0	0	-24.3
m64111_201213_171552_61145826_ccs	3	6497	6424	Asn	GTT	0	0	-22.75
m64111_201213_171552_61145935_ccs	1	4331	4259	Ser	GCT	0	0	-28.26
m64111_201213_171552_61540837_ccs	1	1865	1937	Ser	GCT	0	0	-25.04
m64111_201213_171552_61540837_ccs	2	6777	6849	Ser	GCT	0	0	-28.26
m64111_201213_171552_61801173_ccs0	1	2924	2997	***	CTA	0	0	-30.8
m64111_201213_171552_61801173_ccs01	1	2038	2111	***	CTA	0	0	-30.8
m64111_201213_171552_61997080_ccs	1	252	324	Arg	CCT	0	0	-26.81
m64111_201213_171552_62130109_ccs	1	191	347	Thr	TGT	0	0	-31.12
m64111_201213_171552_62325330_ccs	1	4204	4134	Ser	TGA	0	0	-29.73
m64111_201213_171552_62392019_ccs	1	4275	4347	Asn	GTT	0	0	-31.53
m64111_201213_171552_62392019_ccs	2	5025	4953	Asn	GTT	0	0	-25.25
m64111_201213_171552_62457060_ccs	1	4026	4098	Asn	GTT	0	0	-28.26
m64111_201213_171552_62457772_ccs	1	2592	2521	***	TTA	0	0	-23.97
m64111_201213_171552_62589143_ccs	1	106	178	Lys	CTT	0	0	-27.57
m64111_201213_171552_62785068_ccs	1	2867	2937	***	TTA	0	0	-30.04
m64111_201213_171552_62849346_ccs	1	2144	2216	Ser	GCT	0	0	-28.26
m64111_201213_171552_63374922_ccs	1	4315	4243	Lys	CTT	0	0	-30.59
m64111_201213_171552_63505461_ccs	1	727	655	Ser	GCT	0	0	-28.26
m64111_201213_171552_63767647_ccs	1	7347	7275	Ser	GCT	0	0	-28.56
m64111_201213_171552_63898369_ccs	1	2938	3010	Thr	AGT	0	0	-28.98
m64111_201213_171552_64359026_ccs	1	190	260	Leu	TAG	0	0	-28.78
m64111_201213_171552_1509702_ccs	1	2895	2823	Val	CAC	0	0	-30.16
m64111_201213_171552_1574766_ccs	1	5348	5419	Ser	GCT	0	0	-25.04
m64111_201213_171552_64686200_ccs	1	6735	6806	Ala	AGC	0	0	-28.87
m64111_201213_171552_64749682_ccs0	1	501	430	Ala	AGC	0	0	-28.53
m64111_201213_171552_64817289_ccs0	1	211	139	Gln	CTG	0	0	-28.26
m64111_201213_171552_64947249_ccs	1	389	460	Ala	AGC	0	0	-22.18
m64111_201213_171552_64947249_ccs	2	1232	1305	Lys	CTT	0	0	-27.82
m64111_201213_171552_65603665_ccs	1	4828	4899	Thr	TGT	0	0	-22.11
m64111_201213_171552_65997075_ccs	1	7736	7807	Lys	CTT	0	0	-22.86
m64111_201213_171552_65997075_ccs	2	6431	6361	Ala	AGC	0	0	-27.74
m64111_201213_171552_66060447_ccs	1	2927	2857	Ser	TGA	0	0	-29.73
m64111_201213_171552_66519817_ccs	1	3699	3771	Lys	CTT	0	0	-21.32
m64111_201213_171552_66912415_ccs	1	5387	5459	Ser	GCT	0	0	-29.55
m64111_201213_171552_66913408_ccs	1	1524	1452	Arg	CCT	0	0	-28.26
m64111_201213_171552_66913820_ccs	1	1927	1999	Ser	GCT	0	0	-28.85
m64111_201213_171552_67176907_ccs	1	2948	3021	Cys	GCA	0	0	-31.6
m64111_201213_171552_67176907_ccs	2	4586	4657	Ser	GCT	0	0	-31.32
m64111_201213_171552_67700629_ccs	1	885	813	Lys	CTT	0	0	-31.14
m64111_201213_171552_1770649_ccs0	1	1966	1894	Asn	GTT	0	0	-24.48
m64111_201213_171552_1770649_ccs01	1	1621	1549	Asn	GTT	0	0	-24.48
m64111_201213_171552_1967127_ccs	1	2774	2846	Ser	ACT	0	0	-30.35
m64111_201213_171552_68092771_ccs	1	8724	8654	Gln	TTG	0	0	-29.06
m64111_201213_171552_68159374_ccs	1	7863	7935	Ser	GCT	0	0	-28.95
m64111_201213_171552_68159813_ccs	1	1567	1639	Asn	GTT	0	0	-29.92
m64111_201213_171552_68814638_ccs	1	2948	3020	Asn	GTT	0	0	-26.65
m64111_201213_171552_68946158_ccs	1	4078	4006	Thr	GGT	0	0	-28.26
m64111_201213_171552_69012018_ccs	1	2537	2465	Ser	GCT	0	0	-28.32
m64111_201213_171552_69142189_ccs	1	7737	7665	Ser	GCT	0	0	-28.26
m64111_201213_171552_69142189_ccs	2	7504	7431	Ala	GGC	0	0	-28.26
m64111_201213_171552_69143369_ccs	1	3278	3206	Ser	GCT	0	0	-29.72
m64111_201213_171552_69273544_ccs	1	3082	3154	Ser	GCT	0	0	-28.25
m64111_201213_171552_69274363_ccs	1	3714	3786	Ser	GCT	0	0	-28.26
m64111_201213_171552_69338055_ccs	1	4666	4738	Lys	CTT	0	0	-27.13
m64111_201213_171552_69338555_ccs0	1	905	833	Ser	ACT	0	0	-28.26
m64111_201213_171552_69468346_ccs	1	3155	3227	Gly	TCC	0	0	-26.88
m64111_201213_171552_69600281_ccs	1	3118	3047	Thr	AGT	0	0	-24.57
m64111_201213_171552_69665002_ccs	1	6685	6757	Lys	TTT	0	0	-29.74
m64111_201213_171552_69665002_ccs	2	6519	6447	His	GTG	0	0	-30.05
m64111_201213_171552_69796405_ccs	1	8492	8564	Lys	TTT	0	0	-31.78
m64111_201213_171552_69796405_ccs	2	7170	7099	Gln	CTG	0	0	-30.09
m64111_201213_171552_69863327_ccs	1	170	242	Asn	GTT	0	0	-26.65
m64111_201213_171552_69863831_ccs	1	617	690	Ala	AGC	0	0	-31.1
m64111_201213_171552_69927927_ccs	1	228	300	Ser	GCT	0	0	-28.26
m64111_201213_171552_69994090_ccs	1	2112	2184	Thr	TGT	0	0	-31.72
m64111_201213_171552_70255737_ccs0	1	3491	3561	Ser	TGA	0	0	-29.73
m64111_201213_171552_70910325_ccs	1	2090	2018	Lys	CTT	0	0	-22.87
m64111_201213_171552_71173530_ccs	1	3097	3027	***	TCA	0	0	-24.94
m64111_201213_171552_71173561_ccs	1	2839	2767	Ser	GCT	0	0	-26.65
m64111_201213_171552_71239855_ccs	1	3537	3465	Ala	GGC	0	0	-26.78
m64111_201213_171552_71240497_ccs	1	4253	4181	His	GTG	0	0	-26.5
m64111_201213_171552_71434875_ccs	1	1659	1589	Gly	TCC	0	0	-28.53
m64111_201213_171552_71632193_ccs	1	3067	3139	Lys	CTT	0	0	-30.48
m64111_201213_171552_2163372_ccs	1	2396	2468	Lys	CTT	0	0	-30.26
m64111_201213_171552_2163372_ccs	2	1871	1799	Ser	GCT	0	0	-28.26
m64111_201213_171552_2163730_ccs	1	2312	2240	Asn	ATT	0	0	-31.26
m64111_201213_171552_71764319_ccs	1	2512	2440	Ser	GCT	0	0	-20.47
m64111_201213_171552_71894189_ccs	1	4926	4998	Gly	TCC	0	0	-29.38
m64111_201213_171552_71894189_ccs	2	6511	6439	Asn	GTT	0	0	-28.26
m64111_201213_171552_72091655_ccs	1	2051	1979	Lys	CTT	0	0	-25.04
m64111_201213_171552_72156099_ccs	1	1249	1177	Ser	GCT	0	0	-27.92
m64111_201213_171552_72221917_ccs	1	2205	2134	Ile	GAT	0	0	-27.05
m64111_201213_171552_72354234_ccs	1	7437	7509	Glu	CTC	0	0	-30.61
m64111_201213_171552_72614550_ccs0	1	1802	1731	Ala	TGC	0	0	-26.39
m64111_201213_171552_72614550_ccs01	1	3007	2936	Ala	TGC	0	0	-26.39
m64111_201213_171552_72745636_ccs	1	1171	1243	Lys	CTT	0	0	-26.09
m64111_201213_171552_73073004_ccs	1	327	399	Ser	GCT	0	0	-30.57
m64111_201213_171552_73204860_ccs0	1	3763	3835	Ser	GCT	0	0	-29.52
m64111_201213_171552_73204860_ccs0	2	3304	3232	Ser	GCT	0	0	-19.61
m64111_201213_171552_73664529_ccs	1	1124	942	Ala	AGC	0	0	-31.45
m64111_201213_171552_73664978_ccs	1	10507	10435	Ser	GCT	0	0	-28.26
m64111_201213_171552_73992538_ccs0	1	302	373	Ala	AGC	0	0	-29.07
m64111_201213_171552_73992538_ccs01	1	1072	1143	Ala	AGC	0	0	-29.07
m64111_201213_171552_74384577_ccs	1	4504	4432	Lys	CTT	0	0	-25.04
m64111_201213_171552_74385135_ccs	1	5200	5272	Ser	GCT	0	0	-29.36
m64111_201213_171552_74385135_ccs	2	6594	6522	Ser	GCT	0	0	-25.04
m64111_201213_171552_74580865_ccs0	1	2678	2605	Lys	CTT	0	0	-30.08
m64111_201213_171552_74844080_ccs	1	3092	3020	Ala	AGC	0	0	-31.73
m64111_201213_171552_75301060_ccs	1	7162	7087	Ser	GCT	0	0	-26.49
m64111_201213_171552_75434399_ccs	1	10018	9946	Ser	GCT	0	0	-28.26
m64111_201213_171552_75498780_ccs	1	2780	2852	Ala	TGC	0	0	-31.76
m64111_201213_171552_76022957_ccs	1	529	458	His	ATG	0	0	-26.99
m64111_201213_171552_76218479_ccs	1	5481	5409	Gly	GCC	0	0	-26.7
m64111_201213_171552_76415452_ccs	1	7006	6934	Ala	TGC	0	0	-25.21
m64111_201213_171552_76480882_ccs	1	5999	5929	Cys	ACA	0	0	-31.58
m64111_201213_171552_76679576_ccs	1	7144	7072	Lys	CTT	0	0	-22.99
m64111_201213_171552_76743296_ccs	1	5023	4948	Ser	GCT	0	0	-26.49
m64111_201213_171552_77267436_ccs	1	1735	1810	Ala	AGC	0	0	-30.73
m64111_201213_171552_77267436_ccs	2	289	121	Gln	CTG	0	0	-24.96
m64111_201213_171552_77267886_ccs	1	2158	2230	Ser	GCT	0	0	-29.49
m64111_201213_171552_77267886_ccs	2	1953	1877	Lys	CTT	0	0	-27.99
m64111_201213_171552_77334205_ccs	1	1738	1808	Ser	TGA	0	0	-29.73
m64111_201213_171552_77334205_ccs	2	12105	12035	Gln	TTG	0	0	-29.06
m64111_201213_171552_77399785_ccs	1	666	594	Ser	GCT	0	0	-28.57
m64111_201213_171552_77465982_ccs	1	1828	1757	Ala	AGC	0	0	-30.92
m64111_201213_171552_77530280_ccs	1	3647	3719	Ser	GCT	0	0	-27.06
m64111_201213_171552_77530280_ccs	2	3876	3948	Ser	GCT	0	0	-30.24
m64111_201213_171552_77727227_ccs	1	2760	2688	Lys	CTT	0	0	-27
m64111_201213_171552_77793840_ccs	1	7667	7737	Ala	AGC	0	0	-27.17
m64111_201213_171552_77857911_ccs00	1	1100	1172	Ser	GCT	0	0	-28.26
m64111_201213_171552_77857911_ccs0101	1	8	80	Ser	GCT	0	0	-28.26
m64111_201213_171552_77988749_ccs	1	2230	2302	Gly	TCC	0	0	-30.6
m64111_201213_171552_77989058_ccs	1	2122	2194	Ala	TGC	0	0	-25.76
m64111_201213_171552_78644631_ccs	1	6932	6860	Lys	CTT	0	0	-28.26
m64111_201213_171552_78644631_ccs	2	5691	5619	Asn	GTT	0	0	-27.87
m64111_201213_171552_78710098_ccs	1	2166	2094	Asn	GTT	0	0	-25.62
m64111_201213_171552_78840164_ccs	1	3871	3943	Asn	GTT	0	0	-30.06
m64111_201213_171552_2621937_ccs01	1	583	655	Ser	GCT	0	0	-28.26
m64111_201213_171552_78905579_ccs	1	8973	9044	Asp	ATC	0	0	-23.45
m64111_201213_171552_78906456_ccs	1	2084	2013	Ala	AGC	0	0	-31.62
m64111_201213_171552_78972104_ccs	1	9082	9153	Ala	AGC	0	0	-20.59
m64111_201213_171552_79036938_ccs	1	4472	4544	Ser	GCT	0	0	-28.26
m64111_201213_171552_79036938_ccs	2	6294	6222	Gly	ACC	0	0	-31.61
m64111_201213_171552_79168403_ccs	1	3155	3083	Asn	GTT	0	0	-27.79
m64111_201213_171552_79169460_ccs	1	2603	2531	Ser	GCT	0	0	-27.81
m64111_201213_171552_79169460_ccs	2	1487	1415	Ser	ACT	0	0	-31.02
m64111_201213_171552_79495263_ccs	1	639	711	Leu	TAA	0	0	-29.6
m64111_201213_171552_80020414_ccs	1	2487	2559	Ser	GCT	0	0	-31.32
m64111_201213_171552_80021624_ccs	1	1973	2045	Asn	GTT	0	0	-29.06
m64111_201213_171552_80216236_ccs	1	1397	1469	Ser	GCT	0	0	-28.26
m64111_201213_171552_80348714_ccs	1	2877	2952	Ser	GCT	0	0	-26.49
m64111_201213_171552_80415408_ccs	1	665	593	Asn	GTT	0	0	-28.26
m64111_201213_171552_80544192_ccs	1	3536	3608	Lys	CTT	0	0	-29.72
m64111_201213_171552_80675677_ccs	1	887	815	Ser	GCT	0	0	-28.26
m64111_201213_171552_80873847_ccs	1	8318	8247	Gly	CCC	0	0	-25.11
m64111_201213_171552_81200213_ccs	1	5248	5175	Ser	GCT	0	0	-30.49
m64111_201213_171552_81396394_ccs	1	53	124	Ala	AGC	0	0	-28.27
m64111_201213_171552_81396394_ccs	2	3965	4037	Asn	ATT	0	0	-28.26
m64111_201213_171552_81593172_ccs	1	86	15	Val	AAC	0	0	-23.57
m64111_201213_171552_82051188_ccs	1	6322	6394	Ser	GCT	0	0	-29.09
m64111_201213_171552_82183749_ccs	1	159	231	Gly	GCC	0	0	-30.08
m64111_201213_171552_82184407_ccs0	1	148	220	Ser	GCT	0	0	-26.94
m64111_201213_171552_2886480_ccs	1	934	1004	Gln	TTG	0	0	-29.06
m64111_201213_171552_3146090_ccs	1	1477	1405	Ser	ACT	0	0	-26.98
m64111_201213_171552_82445106_ccs	1	95	23	Lys	CTT	0	0	-29.25
m64111_201213_171552_82445311_ccs	1	940	869	Thr	AGT	0	0	-29.2
m64111_201213_171552_82839218_ccs	1	1826	1898	Ser	GCT	0	0	-28.26
m64111_201213_171552_83166086_ccs01	1	2472	2542	Asp	GTC	0	0	-26.96
m64111_201213_171552_83821598_ccs	1	3036	3106	Gln	TTG	0	0	-29.06
m64111_201213_171552_83952639_ccs	1	3572	3642	Ser	TGA	0	0	-29.73
m64111_201213_171552_84083129_ccs	1	345	273	Gln	CTG	0	0	-28.31
m64111_201213_171552_84214502_ccs	1	3947	3875	Asn	GTT	0	0	-28.26
m64111_201213_171552_84214502_ccs	2	645	573	Ser	GCT	0	0	-22.86
m64111_201213_171552_84345857_ccs	1	541	469	Asn	GTT	0	0	-28.26
m64111_201213_171552_84543612_ccs	1	773	844	Gly	GCC	0	0	-31.61
m64111_201213_171552_84738884_ccs0	1	1666	1736	Asp	ATC	0	0	-23.9
m64111_201213_171552_84805865_ccs	1	3243	3171	Ser	GCT	0	0	-27.61
m64111_201213_171552_84805993_ccs	1	2113	2041	Gly	GCC	0	0	-29.65
m64111_201213_171552_84871593_ccs0	1	1116	1044	Trp	CCA	0	0	-30.53
m64111_201213_171552_84872020_ccs0	1	643	571	Gly	TCC	0	0	-23.75
m64111_201213_171552_84872020_ccs01	1	224	152	Gly	TCC	0	0	-23.7
m64111_201213_171552_85001979_ccs	1	70	1	Ser	GCT	0	0	-30.66
m64111_201213_171552_85132707_ccs	1	1237	1165	Asn	GTT	0	0	-28.26
m64111_201213_171552_85198070_ccs	1	236	103	Ala	AGC	0	0	-28.65
m64111_201213_171552_85329597_ccs	1	1759	1831	Ser	GCT	0	0	-29.3
m64111_201213_171552_85591548_ccs	1	717	646	Gly	ACC	0	0	-31.68
m64111_201213_171552_85658017_ccs	1	911	981	Gln	TTG	0	0	-29.06
m64111_201213_171552_85658024_ccs	1	4268	4339	Gly	GCC	0	0	-31.61
m64111_201213_171552_3213551_ccs	1	2114	2043	Ala	GGC	0	0	-27.87
m64111_201213_171552_3213558_ccs	1	6317	6387	Ser	TGA	0	0	-29.73
m64111_201213_171552_3213558_ccs	2	9417	9487	Gln	TTG	0	0	-29.06
m64111_201213_171552_3213766_ccs	1	13164	13094	Ser	TGA	0	0	-29.73
m64111_201213_171552_3213766_ccs	2	10059	9989	Gln	TTG	0	0	-29.06
m64111_201213_171552_3277468_ccs	1	4525	4453	Gln	TTG	0	0	-29.37
m64111_201213_171552_3344141_ccs	1	2911	2839	His	GTG	0	0	-30.41
m64111_201213_171552_3344302_ccs	1	123	51	Ser	GCT	0	0	-25.69
m64111_201213_171552_3473948_ccs	1	3714	3642	Ser	ACT	0	0	-25.04
m64111_201213_171552_86114420_ccs	1	4064	4136	Ser	GCT	0	0	-26.65
m64111_201213_171552_86443731_ccs0	1	22	94	***	TCA	0	0	-31.69
m64111_201213_171552_86443731_ccs010	1	437	509	***	TCA	0	0	-28.18
m64111_201213_171552_86443731_ccs010101	1	189	261	***	TCA	0	0	-31.69
m64111_201213_171552_86638739_ccs	1	5248	5178	Ser	TGA	0	0	-29.73
m64111_201213_171552_86638835_ccs	1	4662	4590	Ser	GCT	0	0	-28.31
m64111_201213_171552_86638835_ccs	2	2778	2706	Gly	GCC	0	0	-30.4
m64111_201213_171552_86770514_ccs	1	326	398	Gly	GCC	0	0	-28.26
m64111_201213_171552_86770514_ccs	2	1192	1120	Ser	GCT	0	0	-28.26
m64111_201213_171552_86837637_ccs	1	10340	10413	Cys	ACA	0	0	-26.25
m64111_201213_171552_86967398_ccs0	1	2226	2298	Gly	GCC	0	0	-30.48
m64111_201213_171552_86967398_ccs01	1	751	823	Gly	GCC	0	0	-30.48
m64111_201213_171552_87033166_ccs	1	382	310	Ser	GCT	0	0	-28.26
m64111_201213_171552_87230929_ccs	1	1221	1293	Asn	GTT	0	0	-25.04
m64111_201213_171552_87230929_ccs	2	1936	1759	Ala	TGC	0	0	-30.91
m64111_201213_171552_87359864_ccs	1	4661	4589	Ser	GCT	0	0	-28.66
m64111_201213_171552_87493087_ccs	1	473	401	Thr	AGT	0	0	-31.45
m64111_201213_171552_87885438_ccs	1	3881	3953	Trp	CCA	0	0	-29.63
m64111_201213_171552_88081794_ccs	1	214	143	Ala	AGC	0	0	-28.82
m64111_201213_171552_88212176_ccs	1	885	815	Val	GAC	0	0	-28.65
m64111_201213_171552_88278616_ccs	1	1005	1076	Gly	TCC	0	0	-28.95
m64111_201213_171552_88278616_ccs	2	2160	2089	Gly	ACC	0	0	-31.11
m64111_201213_171552_88343918_ccs	1	8690	8763	Ser	GCT	0	0	-30.08
m64111_201213_171552_88410167_ccs	1	192	120	Asn	GTT	0	0	-28.26
m64111_201213_171552_88868153_ccs	1	675	772	Trp	CCA	0	0	-28.01
m64111_201213_171552_88868153_ccs	2	1803	1731	Met	CAT	0	0	-30.87
m64111_201213_171552_88933359_ccs	1	6277	6349	Asp	GTC	0	0	-31.44
m64111_201213_171552_88998058_ccs	1	5420	5492	Asn	GTT	0	0	-25.04
m64111_201213_171552_88998058_ccs	2	3487	3415	Ser	GCT	0	0	-28.26
m64111_201213_171552_88998058_ccs	3	2273	2201	Asp	GTC	0	0	-31.66
m64111_201213_171552_88998763_ccs	1	346	418	Asn	GTT	0	0	-31.03
m64111_201213_171552_88998763_ccs	2	203	131	Lys	CTT	0	0	-26.78
m64111_201213_171552_89129275_ccs0	1	1991	2063	Ser	GCT	0	0	-31.03
m64111_201213_171552_3670710_ccs	1	6019	6091	Ser	GCT	0	0	-27.57
m64111_201213_171552_3670710_ccs	2	5225	5153	Ala	AGC	0	0	-28.99
m64111_201213_171552_89195325_ccs	1	201	54	Leu	AAG	0	0	-31.44
m64111_201213_171552_4129861_ccs	1	2756	2828	Ala	GGC	0	0	-27.39
m64111_201213_171552_4326369_ccs	1	2135	2063	Ser	GCT	0	0	-28.26
m64111_201213_171552_4327980_ccs	1	4977	4906	Gly	TCC	0	0	-30.23
m64111_201213_171552_4458938_ccs	1	3400	3327	Ala	GGC	0	0	-31.56
m64111_201213_171552_4587901_ccs	1	389	461	Lys	CTT	0	0	-23.56
m64111_201213_171552_4653317_ccs	1	142	213	Asn	ATT	0	0	-30.55
m64111_201213_171552_4719078_ccs0	1	2409	2337	Ser	GCT	0	0	-28.26
m64111_201213_171552_4785073_ccs	1	6893	6823	Ser	GCT	0	0	-28.26
m64111_201213_171552_5048959_ccs	1	6193	6121	Ser	GCT	0	0	-28.26
m64111_201213_171552_5048963_ccs	1	5149	5221	Lys	CTT	0	0	-29.19
m64111_201213_171552_5177415_ccs	1	1129	1201	Asn	GTT	0	0	-28.26
m64111_201213_171552_5309988_ccs	1	1743	1814	Val	TAC	0	0	-25.31
m64111_201213_171552_5507770_ccs	1	507	579	Ser	GCT	0	0	-25.12
m64111_201213_171552_5507770_ccs	2	1410	1482	Pro	GGG	0	0	-28.15
m64111_201213_171552_5571816_ccs0	1	164	92	Ile	GAT	0	0	-25.98
m64111_201213_171552_5571816_ccs01	1	810	738	Ile	GAT	0	0	-30.87
m64111_201213_171552_5637608_ccs	1	750	678	Ala	TGC	0	0	-29.93
m64111_201213_171552_5898955_ccs	1	5530	5602	Asn	GTT	0	0	-19.58
m64111_201213_171552_6031791_ccs	1	973	1045	Gln	CTG	0	0	-28.26
m64111_201213_171552_6358883_ccs	1	4767	4695	Asn	GTT	0	0	-28.82
m64111_201213_171552_6686975_ccs	1	180	252	Asn	GTT	0	0	-26.62
m64111_201213_171552_6686975_ccs	2	3476	3548	Ser	GCT	0	0	-28.26
m64111_201213_171552_7079591_ccs	1	2609	2530	Gln	CTG	0	0	-24.24
m64111_201213_171552_7209395_ccs	1	1514	1442	Ser	GCT	0	0	-26.94
m64111_201213_171552_7340527_ccs0	1	1570	1642	Ser	GCT	0	0	-25.37
m64111_201213_171552_7340527_ccs01	1	6993	7065	Ser	GCT	0	0	-25.37
m64111_201213_171552_7603490_ccs	1	7397	7326	Ala	AGC	0	0	-29.43
m64111_201213_171552_7668713_ccs	1	7524	7454	Gln	TTG	0	0	-29.06
m64111_201213_171552_8259962_ccs	1	788	859	Tyr	ATA	0	0	-28.95
m64111_201213_171552_8388871_ccs	1	3467	3538	Lys	CTT	0	0	-27.35
m64111_201213_171552_89459069_ccs	1	2257	2329	Thr	AGT	0	0	-21.83
m64111_201213_171552_89587882_ccs	1	2058	2128	Ser	TGA	0	0	-29.73
m64111_201213_171552_89587882_ccs	2	5156	5226	Gln	TTG	0	0	-29.06
m64111_201213_171552_89655470_ccs	1	5279	5207	Asn	GTT	0	0	-25.04
m64111_201213_171552_89787134_ccs	1	3204	3132	Asn	GTT	0	0	-28.26
m64111_201213_171552_89983763_ccs	1	443	372	Thr	TGT	0	0	-30.16
m64111_201213_171552_90113176_ccs0	1	430	502	Ser	GCT	0	0	-25.04
m64111_201213_171552_90113176_ccs01	1	18	90	Ser	GCT	0	0	-25.04
m64111_201213_171552_90573167_ccs	1	2552	2480	Asn	GTT	0	0	-31.17
m64111_201213_171552_90966179_ccs	1	95	24	Lys	CTT	0	0	-26.47
m64111_201213_171552_91096188_ccs	1	5328	5400	Ser	GCT	0	0	-26.92
m64111_201213_171552_91161222_ccs0	1	1319	1247	Ser	GCT	0	0	-28.1
m64111_201213_171552_44173518_ccs	1	7287	7353	Ala	TGC	0	0	-24.2
m64111_201213_171552_44173518_ccs	2	5596	5524	Arg	CCT	0	0	-27.94
m64111_201213_171552_44370549_ccs	1	5138	5210	Ser	GCT	0	0	-26.14
m64111_201213_171552_91228032_ccs	1	1875	1748	Ser	AGA	0	0	-27.17
m64111_201213_171552_91294077_ccs	1	2352	2423	Gly	TCC	0	0	-20.63
m64111_201213_171552_91620298_ccs	1	6150	6222	Lys	CTT	0	0	-25.04
m64111_201213_171552_91620298_ccs	2	6517	6445	Ser	GCT	0	0	-28.26
m64111_201213_171552_91620298_ccs	3	4695	4623	Met	CAT	0	0	-29.93
m64111_201213_171552_91881845_ccs	1	5888	5960	Lys	CTT	0	0	-30.83
m64111_201213_171552_92209897_ccs01	1	334	404	Cys	GCA	0	0	-31.48
m64111_201213_171552_92276663_ccs	1	1207	1278	Lys	CTT	0	0	-27.57
m64111_201213_171552_92340446_ccs0	1	436	364	***	TCA	0	0	-31.69
m64111_201213_171552_92340446_ccs010	1	484	412	***	TCA	0	0	-31.69
m64111_201213_171552_92343002_ccs	1	2556	2484	Pro	TGG	0	0	-30.03
m64111_201213_171552_92407958_ccs	1	667	738	Lys	CTT	0	0	-29.62
m64111_201213_171552_92407958_ccs	2	3153	3081	Asp	GTC	0	0	-31.19
m64111_201213_171552_92930083_ccs	1	91	10	Ser	GCT	0	0	-29.41
m64111_201213_171552_92931364_ccs	1	2110	2183	Ser	GCT	0	0	-24.82
m64111_201213_171552_92997053_ccs	1	93	21	Ser	GCT	0	0	-25.1
m64111_201213_171552_92997579_ccs	1	7165	7237	Ser	GCT	0	0	-28.26
m64111_201213_171552_93388974_ccs	1	6	77	Ala	GGC	0	0	-17.76
m64111_201213_171552_93585773_ccs	1	2336	2264	Lys	CTT	0	0	-28.26
m64111_201213_171552_93586182_ccs	1	4017	4089	***	CTA	0	0	-24.79
m64111_201213_171552_94046458_ccs	1	3394	3322	Asn	GTT	0	0	-26.48
m64111_201213_171552_94175371_ccs	1	1808	1879	Pro	AGG	0	0	-20.71
m64111_201213_171552_94437497_ccs	1	1970	2041	Thr	GGT	0	0	-21.94
m64111_201213_171552_94437646_ccs	1	3059	3132	His	GTG	0	0	-24.11
m64111_201213_171552_94568764_ccs	1	4150	4304	Leu	CAA	0	0	-27.81
m64111_201213_171552_94568764_ccs	2	693	618	Cys	ACA	0	0	-31.77
m64111_201213_171552_94569701_ccs	1	4049	3978	Ala	TGC	0	0	-30.54
m64111_201213_171552_94699540_ccs	1	1175	1247	Ser	GCT	0	0	-29.56
m64111_201213_171552_94767237_ccs	1	841	913	Asp	GTC	0	0	-25.74
m64111_201213_171552_94832500_ccs	1	5084	5012	Ser	GCT	0	0	-28.43
m64111_201213_171552_44565227_ccs	1	785	858	Trp	CCA	0	0	-27.38
m64111_201213_171552_44566372_ccs	1	8432	8505	Ser	GCT	0	0	-28.26
m64111_201213_171552_44631252_ccs01	1	1131	1061	Gly	CCC	0	0	-13.9
m64111_201213_171552_44631977_ccs	1	5361	5432	Gly	TCC	0	0	-30.05
m64111_201213_171552_94962853_ccs	1	3975	3904	Tyr	ATA	0	0	-29.7
m64111_201213_171552_95291008_ccs	1	1603	1675	Ser	GCT	0	0	-28.26
m64111_201213_171552_95356226_ccs	1	5688	5759	Ala	TGC	0	0	-28.42
m64111_201213_171552_95356226_ccs	2	1291	1219	Arg	TCT	0	0	-31.65
m64111_201213_171552_95815113_ccs	1	1422	1494	Ser	GCT	0	0	-25.04
m64111_201213_171552_95815113_ccs	2	5918	5989	Ala	AGC	0	0	-25.13
m64111_201213_171552_95815113_ccs	3	7239	7314	Gly	ACC	0	0	-31.12
m64111_201213_171552_95815113_ccs	4	8887	8815	Ser	GCT	0	0	-28.3
m64111_201213_171552_95815113_ccs	5	8692	8620	Ser	GCT	0	0	-28.26
m64111_201213_171552_95879373_ccs	1	3491	3563	Thr	GGT	0	0	-25.04
m64111_201213_171552_96208473_ccs	1	2517	2589	Asn	GTT	0	0	-30.65
m64111_201213_171552_96273559_ccs	1	2567	2639	Gly	GCC	0	0	-23.17
m64111_201213_171552_96734038_ccs	1	1102	1174	Val	TAC	0	0	-29.47
m64111_201213_171552_96993818_ccs	1	4549	4620	Val	AAC	0	0	-26.91
m64111_201213_171552_97518950_ccs	1	1479	1407	Gly	TCC	0	0	-23.02
m64111_201213_171552_97518950_ccs	2	1278	1206	Gly	GCC	0	0	-30.22
m64111_201213_171552_97583247_ccs	1	1423	1350	Ser	GCT	0	0	-31.19
m64111_201213_171552_97714384_ccs	1	1176	1248	Ser	GCT	0	0	-28.26
m64111_201213_171552_97781848_ccs0	1	1404	1332	Gly	TCC	0	0	-25.49
m64111_201213_171552_97781848_ccs01	1	1072	1000	Gly	TCC	0	0	-25.49
m64111_201213_171552_98043590_ccs	1	212	283	Gly	TCC	0	0	-24.97
m64111_201213_171552_98370663_ccs	1	2492	2564	Gly	GCC	0	0	-30.27
m64111_201213_171552_98436873_ccs	1	9378	9449	Thr	GGT	0	0	-30.63
m64111_201213_171552_98437551_ccs	1	8090	8162	Ser	GCT	0	0	-30.13
m64111_201213_171552_98566785_ccs	1	8300	8373	Gly	GCC	0	0	-31.48
m64111_201213_171552_44828233_ccs	1	3843	3915	Lys	CTT	0	0	-28.01
m64111_201213_171552_44828397_ccs	1	714	642	Ser	GCT	0	0	-27.57
m64111_201213_171552_44894088_ccs	1	1860	1788	Ser	GCT	0	0	-28.26
m64111_201213_171552_45090957_ccs	1	1497	1569	Ile	GAT	0	0	-24.12
m64111_201213_171552_45090957_ccs	2	65	1	Arg	CCT	0	0	-27.7
m64111_201213_171552_45091005_ccs	1	649	721	Ser	GCT	0	0	-28.26
m64111_201213_171552_98765639_ccs	1	4989	4920	Gly	ACC	0	0	-28.47
m64111_201213_171552_98829251_ccs	1	9180	9252	Ser	GCT	0	0	-28.26
m64111_201213_171552_98829251_ccs	2	16952	17024	Ser	GCT	0	0	-29.78
m64111_201213_171552_98829974_ccs	1	188	116	Ser	GCT	0	0	-19.68
m64111_201213_171552_98830730_ccs	1	859	931	Val	GAC	0	0	-28.96
m64111_201213_171552_98961256_ccs	1	3533	3605	Ser	GCT	0	0	-25.04
m64111_201213_171552_98961256_ccs	2	3206	3133	Ser	GCT	0	0	-23.09
m64111_201213_171552_99484273_ccs	1	4914	4984	Ala	AGC	0	0	-29.77
m64111_201213_171552_99549770_ccs	1	1374	1446	Ser	GCT	0	0	-26.25
m64111_201213_171552_99747464_ccs0	1	2048	2119	Gly	GCC	0	0	-28.74
m64111_201213_171552_99748463_ccs	1	155	83	Ser	GCT	0	0	-24.67
m64111_201213_171552_99814233_ccs	1	4038	3967	Trp	CCA	0	0	-31.39
m64111_201213_171552_99879524_ccs	1	1228	1156	Lys	CTT	0	0	-28.6
m64111_201213_171552_100074973_ccs	1	2448	2356	Leu	TAA	0	0	-31.04
m64111_201213_171552_100140801_ccs	1	512	441	Leu	CAG	0	0	-27.65
m64111_201213_171552_100468834_ccs	1	2608	2536	Ser	GCT	0	0	-28.01
m64111_201213_171552_100664939_ccs	1	4795	4866	Ser	GCT	0	0	-28.26
m64111_201213_171552_100729498_ccs	1	5243	5315	Asn	GTT	0	0	-26.65
m64111_201213_171552_101058488_ccs	1	343	271	Asn	GTT	0	0	-27.95
m64111_201213_171552_101189910_ccs0	1	1770	1840	Glu	TTC	0	0	-26.14
m64111_201213_171552_101189910_ccs01	1	783	853	Glu	TTC	0	0	-26.7
m64111_201213_171552_101909118_ccs0	1	81	9	Ser	GCT	0	0	-28.81
m64111_201213_171552_101910860_ccs	1	553	625	Arg	CCT	0	0	-28.26
m64111_201213_171552_101910860_ccs	2	1633	1561	Ser	GCT	0	0	-25.23
m64111_201213_171552_45351649_ccs	1	4143	4072	Lys	CTT	0	0	-30.02
m64111_201213_171552_45351649_ccs	2	3570	3498	Ser	GCT	0	0	-29.91
m64111_201213_171552_45352224_ccs	1	339	409	Gln	TTG	0	0	-29.06
m64111_201213_171552_45352224_ccs	2	5672	5602	Ser	TGA	0	0	-29.73
m64111_201213_171552_102369237_ccs	1	2629	2701	Ser	GCT	0	0	-29.88
m64111_201213_171552_102434359_ccs	1	3636	3708	Ser	GCT	0	0	-25.86
m64111_201213_171552_102630242_ccs	1	4766	4695	Ala	TGC	0	0	-29.01
m64111_201213_171552_102631283_ccs	1	5259	5331	Ser	GCT	0	0	-28.86
m64111_201213_171552_102762035_ccs	1	558	630	Asn	GTT	0	0	-25.39
m64111_201213_171552_102828701_ccs	1	3123	3051	Leu	GAG	0	0	-28.65
m64111_201213_171552_102891953_ccs	1	436	363	Cys	ACA	0	0	-28.27
m64111_201213_171552_102891953_ccs	2	172	100	Ala	AGC	0	0	-28.75
m64111_201213_171552_103284746_ccs	1	2390	2461	Asn	GTT	0	0	-28.71
m64111_201213_171552_103548987_ccs	1	2186	2258	Ser	GCT	0	0	-31.03
m64111_201213_171552_103612842_ccs	1	3825	3754	Thr	GGT	0	0	-30.68
m64111_201213_171552_103612842_ccs	2	1962	1890	Ser	GCT	0	0	-28.26
m64111_201213_171552_103679689_ccs	1	3549	3477	Ser	GCT	0	0	-27.3
m64111_201213_171552_103679689_ccs	2	2382	2309	Lys	CTT	0	0	-30
m64111_201213_171552_103680147_ccs	1	1915	1987	Ser	GCT	0	0	-28.26
m64111_201213_171552_103743554_ccs	1	5317	5389	Asn	GTT	0	0	-29.71
m64111_201213_171552_103743554_ccs	2	6926	6854	Lys	CTT	0	0	-24.72
m64111_201213_171552_103875856_ccs0	1	307	379	Gln	CTG	0	0	-23.61
m64111_201213_171552_104138099_ccs	1	1783	1855	Pro	GGG	0	0	-31.23
m64111_201213_171552_104203577_ccs	1	1677	1605	His	GTG	0	0	-29.56
m64111_201213_171552_104204845_ccs	1	5986	5914	Glu	CTC	0	0	-30.61
m64111_201213_171552_104400714_ccs	1	8218	8146	Asn	ATT	0	0	-30.91
m64111_201213_171552_104596975_ccs	1	1997	1925	Asn	GTT	0	0	-28.26
m64111_201213_171552_104792204_ccs	1	6171	6243	Thr	GGT	0	0	-27.17
m64111_201213_171552_104990355_ccs	1	591	661	Thr	AGT	0	0	-28.3
m64111_201213_171552_105383240_ccs	1	1111	1183	Ser	GCT	0	0	-30.22
m64111_201213_171552_45482136_ccs	1	4001	4073	Ser	GCT	0	0	-22.87
m64111_201213_171552_45484041_ccs	1	1480	1552	Asn	GTT	0	0	-26.65
m64111_201213_171552_45615911_ccs	1	9193	9123	Ser	TGA	0	0	-29.73
m64111_201213_171552_45615911_ccs	2	6092	6022	Gln	TTG	0	0	-29.06
m64111_201213_171552_45615925_ccs	1	2420	2492	Ser	GCT	0	0	-29.12
m64111_201213_171552_45615925_ccs	2	1291	1218	Ser	GCT	0	0	-22.93
m64111_201213_171552_105710635_ccs	1	37	107	Phe	GAA	0	0	-29.24
m64111_201213_171552_105710635_ccs	2	1014	1084	Ala	AGC	0	0	-25.23
m64111_201213_171552_105711898_ccs0	1	150	78	Ser	GCT	0	0	-30.01
m64111_201213_171552_105842631_ccs	1	615	686	Val	TAC	0	0	-30.09
m64111_201213_171552_105908975_ccs	1	3504	3576	Thr	AGT	0	0	-30.33
m64111_201213_171552_105973382_ccs	1	967	1039	Ser	GCT	0	0	-28.26
m64111_201213_171552_106497521_ccs	1	3560	3632	Lys	CTT	0	0	-28.82
m64111_201213_171552_106693851_ccs	1	3775	3847	Ser	GCT	0	0	-27.28
m64111_201213_171552_106760720_ccs	1	4846	4774	Leu	CAA	0	0	-31.71
m64111_201213_171552_106760720_ccs	2	2847	2774	Gln	CTG	0	0	-31.23
m64111_201213_171552_107021907_ccs	1	6394	6322	Ser	GCT	0	0	-23.08
m64111_201213_171552_107152348_ccs	1	954	1024	Gln	TTG	0	0	-29.06
m64111_201213_171552_107414688_ccs	1	3869	3941	Ser	GCT	0	0	-29.25
m64111_201213_171552_107480613_ccs	1	6413	6485	Ile	GAT	0	0	-29.64
m64111_201213_171552_107480613_ccs	2	4083	4011	Ser	GCT	0	0	-28.26
m64111_201213_171552_107939634_ccs	1	2939	2867	Ser	GCT	0	0	-28.26
m64111_201213_171552_108201450_ccs	1	2534	2606	Tyr	ATA	0	0	-30.4
m64111_201213_171552_108201450_ccs	2	1076	1004	Asp	GTC	0	0	-28.26
m64111_201213_171552_108333076_ccs	1	4025	4097	Ser	GCT	0	0	-28.01
m64111_201213_171552_108921706_ccs	1	6887	6815	Ile	GAT	0	0	-27.1
m64111_201213_171552_108921706_ccs	2	880	808	Ser	GCT	0	0	-28.26
m64111_201213_171552_108922110_ccs	1	663	735	Ser	GCT	0	0	-28.26
m64111_201213_171552_108922110_ccs	2	1487	1559	Ser	GCT	0	0	-24.97
m64111_201213_171552_108922110_ccs	3	4337	4261	Asp	GTC	0	0	-28.3
m64111_201213_171552_108922300_ccs0	1	1921	1991	Gly	TCC	0	0	-26.02
m64111_201213_171552_108922300_ccs01	1	1289	1359	Gly	TCC	0	0	-26.02
m64111_201213_171552_109119305_ccs	1	7440	7367	Trp	CCA	0	0	-31.8
m64111_201213_171552_109183108_ccs	1	2363	2434	Ala	AGC	0	0	-22.22
m64111_201213_171552_109316549_ccs	1	2728	2656	Ser	GCT	0	0	-24.82
m64111_201213_171552_109380132_ccs	1	8115	8043	Ser	GCT	0	0	-28.43
m64111_201213_171552_109380132_ccs	2	3715	3645	Val	CAC	0	0	-28.5
m64111_201213_171552_45876810_ccs	1	7886	7956	Gly	ACC	0	0	-31.62
m64111_201213_171552_46009171_ccs	1	877	947	Ser	GCT	0	0	-27.93
m64111_201213_171552_46072972_ccs	1	3447	3375	Ala	AGC	0	0	-29.07
m64111_201213_171552_109578056_ccs	1	2241	2313	Asn	GTT	0	0	-30.57
m64111_201213_171552_109578056_ccs	2	581	511	Gly	TCC	0	0	-20.65
m64111_201213_171552_109642386_ccs	1	4573	4502	Ala	AGC	0	0	-29.05
m64111_201213_171552_109969445_ccs	1	2162	2234	Ser	GCT	0	0	-30.81
m64111_201213_171552_109969445_ccs	2	3377	3305	Val	AAC	0	0	-31.06
m64111_201213_171552_110035472_ccs	1	185	112	Trp	CCA	0	0	-31.35
m64111_201213_171552_110166353_ccs	1	265	337	Pro	TGG	0	0	-31.43
m64111_201213_171552_110167574_ccs	1	246	165	Gly	ACC	0	0	-26.85
m64111_201213_171552_110299435_ccs	1	726	796	Ser	TGA	0	0	-29.73
m64111_201213_171552_110299435_ccs	2	3824	3894	Gln	TTG	0	0	-29.06
m64111_201213_171552_110493868_ccs	1	2681	2753	Ser	GCT	0	0	-26.95
m64111_201213_171552_110821400_ccs	1	1588	1516	Lys	CTT	0	0	-27
m64111_201213_171552_110822537_ccs	1	197	125	Lys	CTT	0	0	-31.25
m64111_201213_171552_110889371_ccs	1	5134	5206	Ser	GCT	0	0	-31.28
m64111_201213_171552_110889371_ccs	2	7217	7145	Asn	GTT	0	0	-26.53
m64111_201213_171552_111216280_ccs	1	125	197	Ser	GCT	0	0	-31.2
m64111_201213_171552_111216280_ccs	2	346	418	Ser	GCT	0	0	-28.26
m64111_201213_171552_111216280_ccs	3	2038	2110	Ser	GCT	0	0	-31.32
m64111_201213_171552_111609274_ccs	1	6833	6905	Ser	GCT	0	0	-28.26
m64111_201213_171552_111937660_ccs	1	2818	2890	Ser	GCT	0	0	-23.42
m64111_201213_171552_112657009_ccs	1	1879	1807	Arg	CCT	0	0	-26.58
m64111_201213_171552_112853176_ccs	1	1898	1826	Ser	GCT	0	0	-28.26
m64111_201213_171552_112920622_ccs	1	2929	2857	Val	GAC	0	0	-25.04
m64111_201213_171552_46204126_ccs	1	3238	3310	Lys	CTT	0	0	-30.26
m64111_201213_171552_46402135_ccs	1	5164	5236	Ser	GCT	0	0	-31.03
m64111_201213_171552_46402135_ccs	2	6358	6430	Ser	GCT	0	0	-28.26
m64111_201213_171552_46402135_ccs	3	5701	5629	Ser	GCT	0	0	-28.26
m64111_201213_171552_46530887_ccs	1	4317	4389	Ser	GCT	0	0	-31.68
m64111_201213_171552_113248966_ccs	1	3596	3524	Ser	GCT	0	0	-30.96
m64111_201213_171552_113444871_ccs	1	1833	1709	Ser	AGA	0	0	-31.29
m64111_201213_171552_113445373_ccs	1	9880	9810	Ser	TGA	0	0	-29.73
m64111_201213_171552_113445373_ccs	2	6782	6712	Gln	TTG	0	0	-29.06
m64111_201213_171552_113902750_ccs	1	2690	2762	Ser	GCT	0	0	-29.1
m64111_201213_171552_113902750_ccs	2	3055	3127	Arg	TCT	0	0	-30.05
m64111_201213_171552_114032900_ccs	1	2894	2966	Ser	ACT	0	0	-30.47
m64111_201213_171552_114032900_ccs	2	1850	1777	Ser	GCT	0	0	-27.98
m64111_201213_171552_114165987_ccs	1	7882	7954	Ser	GCT	0	0	-26.65
m64111_201213_171552_114295892_ccs	1	799	869	Ser	TGA	0	0	-29.73
m64111_201213_171552_114295892_ccs	2	3900	3970	Gln	TTG	0	0	-29.06
m64111_201213_171552_114361520_ccs	1	2527	2599	Arg	TCT	0	0	-28.26
m64111_201213_171552_114688894_ccs	1	3190	3262	Asn	GTT	0	0	-26.65
m64111_201213_171552_114952472_ccs	1	4415	4343	Ser	GCT	0	0	-29.06
m64111_201213_171552_115278967_ccs0	1	1988	1916	Trp	CCA	0	0	-30.53
m64111_201213_171552_115409704_ccs	1	1717	1645	Lys	CTT	0	0	-28.98
m64111_201213_171552_115474482_ccs	1	1556	1628	Gly	TCC	0	0	-30.89
m64111_201213_171552_115605717_ccs	1	4971	4899	Ser	GCT	0	0	-28.26
m64111_201213_171552_115671895_ccs01	1	761	689	Lys	CTT	0	0	-22.76
m64111_201213_171552_116197402_ccs	1	1920	1992	Ser	GCT	0	0	-30.48
m64111_201213_171552_116329304_ccs	1	642	570	Met	CAT	0	0	-27.9
m64111_201213_171552_116459402_ccs	1	753	824	Asp	GTC	0	0	-30.73
m64111_201213_171552_46598356_ccs	1	2310	2222	Leu	CAG	0	0	-31.39
m64111_201213_171552_46727348_ccs0	1	1739	1669	Ser	TGA	0	0	-29.73
m64111_201213_171552_46727348_ccs01	1	1477	1549	Ser	GCT	0	0	-26.14
m64111_201213_171552_116720256_ccs	1	2202	2274	Ser	GCT	0	0	-26.95
m64111_201213_171552_117442345_ccs	1	882	954	Arg	CCT	0	0	-31.75
m64111_201213_171552_117507419_ccs	1	260	332	Ser	GCT	0	0	-27.82
m64111_201213_171552_117507419_ccs	2	516	588	Ser	GCT	0	0	-28.56
m64111_201213_171552_117507419_ccs	3	3241	3314	Ser	GCT	0	0	-28.26
m64111_201213_171552_117899802_ccs	1	823	751	Ser	GCT	0	0	-28.26
m64111_201213_171552_118032491_ccs	1	1424	1496	Thr	TGT	0	0	-31.19
m64111_201213_171552_118033005_ccs	1	1031	961	Ser	TGA	0	0	-29.73
m64111_201213_171552_118097804_ccs001	1	668	596	His	GTG	0	0	-29.56
m64111_201213_171552_118489958_ccs0	1	4792	4864	Ser	GCT	0	0	-25.04
m64111_201213_171552_118554700_ccs	1	6107	6178	Gly	TCC	0	0	-23.13
m64111_201213_171552_118555214_ccs	1	4180	4250	Ser	TGA	0	0	-29.73
m64111_201213_171552_118555214_ccs	2	6052	5982	Gln	TTG	0	0	-29.06
m64111_201213_171552_118620793_ccs	1	5427	5355	Ser	GCT	0	0	-26.09
m64111_201213_171552_118753561_ccs	1	7307	7379	Glu	TTC	0	0	-29.09
m64111_201213_171552_118816823_ccs	1	230	158	Ile	TAT	0	0	-30.61
m64111_201213_171552_118817691_ccs	1	817	745	Lys	CTT	0	0	-31.04
m64111_201213_171552_118817691_ccs	2	632	560	Ser	GCT	0	0	-26.32
m64111_201213_171552_119146456_ccs	1	510	438	Ser	GCT	0	0	-28.26
m64111_201213_171552_119473082_ccs0	1	3962	3892	Val	CAC	0	0	-23.24
m64111_201213_171552_119670590_ccs	1	2626	2554	Gly	GCC	0	0	-28.26
m64111_201213_171552_119999251_ccs	1	6026	6098	Asn	GTT	0	0	-22.81
m64111_201213_171552_119999251_ccs	2	836	764	Ser	GCT	0	0	-24.3
m64111_201213_171552_120129201_ccs	1	547	472	Gly	GCC	0	0	-29.43
m64111_201213_171552_120129997_ccs	1	3195	3123	Ser	GCT	0	0	-30.48
m64111_201213_171552_120129997_ccs	2	2065	1992	Lys	CTT	0	0	-28.26
m64111_201213_171552_120130175_ccs	1	4508	4580	Lys	CTT	0	0	-29.72
m64111_201213_171552_120130175_ccs	2	5921	5849	Ser	GCT	0	0	-28.26
m64111_201213_171552_120325016_ccs	1	876	948	Ser	GCT	0	0	-27.1
m64111_201213_171552_46989321_ccs	1	2268	2339	***	TCA	0	0	-31.63
m64111_201213_171552_47188575_ccs	1	1721	1650	Asn	GTT	0	0	-30.78
m64111_201213_171552_120456160_ccs	1	1051	982	Thr	AGT	0	0	-29.35
m64111_201213_171552_120456952_ccs	1	6986	6914	Lys	CTT	0	0	-28.36
m64111_201213_171552_120457906_ccs	1	190	118	Gly	GCC	0	0	-25.59
m64111_201213_171552_120588170_ccs	1	1580	1655	Gly	GCC	0	0	-29.43
m64111_201213_171552_120652768_ccs	1	1286	1215	Tyr	GTA	0	0	-28.04
m64111_201213_171552_120916107_ccs	1	1956	2028	Thr	GGT	0	0	-27.55
m64111_201213_171552_121045314_ccs	1	3960	4032	Asn	GTT	0	0	-22.89
m64111_201213_171552_121045314_ccs	2	12578	12506	Lys	CTT	0	0	-28.26
m64111_201213_171552_121045314_ccs	3	11711	11639	Ser	GCT	0	0	-30.38
m64111_201213_171552_121045314_ccs	4	6391	6318	Thr	GGT	0	0	-29.64
m64111_201213_171552_121045316_ccs	1	639	711	Asn	GTT	0	0	-27.78
m64111_201213_171552_121045316_ccs	2	103	32	Thr	AGT	0	0	-16.09
m64111_201213_171552_121244197_ccs	1	2965	2893	Ser	GCT	0	0	-28.26
m64111_201213_171552_121375052_ccs0	1	338	266	Asp	GTC	0	0	-28.86
m64111_201213_171552_121375052_ccs01	1	710	638	Asp	GTC	0	0	-28.86
m64111_201213_171552_121766256_ccs	1	3260	3185	Asn	GTT	0	0	-31.18
m64111_201213_171552_121766256_ccs	2	2634	2562	Ser	GCT	0	0	-28.05
m64111_201213_171552_121767184_ccs	1	449	377	Ser	GCT	0	0	-28.26
m64111_201213_171552_122094625_ccs	1	2379	2307	Ser	GCT	0	0	-28.26
m64111_201213_171552_122290753_ccs	1	753	683	Met	CAT	0	0	-27.71
m64111_201213_171552_122293000_ccs	1	2785	2855	Gln	TTG	0	0	-29.06
m64111_201213_171552_122421571_ccs	1	1225	1153	Ser	GCT	0	0	-28.26
m64111_201213_171552_122424046_ccs	1	1008	1078	Gln	TTG	0	0	-29.06
m64111_201213_171552_122424046_ccs	2	10342	10412	Ser	TGA	0	0	-29.73
m64111_201213_171552_122487003_ccs	1	3612	3683	Thr	TGT	0	0	-26.08
m64111_201213_171552_122816029_ccs	1	1943	1871	Lys	CTT	0	0	-29.99
m64111_201213_171552_123078813_ccs	1	3360	3432	Ser	GCT	0	0	-29.42
m64111_201213_171552_123210096_ccs	1	5530	5602	Asn	GTT	0	0	-28.26
m64111_201213_171552_123405215_ccs	1	1288	1216	Ser	GCT	0	0	-27.04
m64111_201213_171552_123535607_ccs	1	4708	4638	Gly	GCC	0	0	-25.05
m64111_201213_171552_123733176_ccs0	1	381	312	Val	AAC	0	0	-26.22
m64111_201213_171552_123733637_ccs	1	2316	2244	Thr	GGT	0	0	-30.4
m64111_201213_171552_123994252_ccs0	1	3407	3479	Ala	TGC	0	0	-31.24
m64111_201213_171552_123994252_ccs01	1	2174	2246	Ala	TGC	0	0	-31.24
m64111_201213_171552_47383087_ccs	1	2019	2091	Cys	ACA	0	0	-28.49
m64111_201213_171552_47383087_ccs	2	3092	3164	Ser	GCT	0	0	-28.26
m64111_201213_171552_47384028_ccs	1	7889	7811	Ala	AGC	0	0	-28.29
m64111_201213_171552_124258470_ccs	1	656	725	Ile	AAT	0	0	-28.18
m64111_201213_171552_124453849_ccs010	1	2075	2146	Ala	AGC	0	0	-28.73
m64111_201213_171552_124847989_ccs	1	2493	2563	Ala	TGC	0	0	-30.96
m64111_201213_171552_124911864_ccs	1	9908	9980	Ser	GCT	0	0	-29.66
m64111_201213_171552_125109242_ccs00	1	656	728	Ser	GCT	0	0	-22.69
m64111_201213_171552_125109242_ccs0101	1	494	566	Ser	GCT	0	0	-22.69
m64111_201213_171552_125111015_ccs00	1	146	218	***	TTA	0	0	-29.89
m64111_201213_171552_125111015_ccs01	1	759	831	***	TTA	0	0	-29.89
m64111_201213_171552_125372490_ccs	1	1523	1595	Ala	TGC	0	0	-28.95
m64111_201213_171552_125437827_ccs	1	2986	3057	Ala	AGC	0	0	-21.48
m64111_201213_171552_125437827_ccs	2	3687	3615	Ser	GCT	0	0	-27.57
m64111_201213_171552_125504126_ccs	1	1768	1696	Ser	GCT	0	0	-28.26
m64111_201213_171552_125569488_ccs	1	158	87	Ala	AGC	0	0	-23.65
m64111_201213_171552_125699593_ccs	1	461	533	Ser	ACT	0	0	-28.94
m64111_201213_171552_125765164_ccs	1	3069	3141	Lys	CTT	0	0	-25.74
m64111_201213_171552_125962940_ccs	1	3660	3588	Ser	GCT	0	0	-28.26
m64111_201213_171552_126026381_ccs0	1	1509	1437	Trp	CCA	0	0	-30.53
m64111_201213_171552_126026381_ccs01	1	521	449	Trp	CCA	0	0	-31.09
m64111_201213_171552_126420447_ccs	1	8322	8251	Ser	GCT	0	0	-27.06
m64111_201213_171552_126420447_ccs	2	7570	7498	Ser	GCT	0	0	-31.27
m64111_201213_171552_126420447_ccs	3	6839	6767	Thr	GGT	0	0	-28.26
m64111_201213_171552_126550717_ccs	1	1598	1668	***	TTA	0	0	-30.42
m64111_201213_171552_126552302_ccs	1	2939	2867	Ser	GCT	0	0	-28.26
m64111_201213_171552_126616886_ccs	1	2182	2110	Gly	GCC	0	0	-31.67
m64111_201213_171552_126681689_ccs	1	1586	1658	Asn	GTT	0	0	-28.1
m64111_201213_171552_126681689_ccs	2	10058	10129	Val	AAC	0	0	-30.92
m64111_201213_171552_126681689_ccs	3	10187	10259	Asn	GTT	0	0	-28.26
m64111_201213_171552_126682765_ccs	1	861	790	Ser	GCT	0	0	-26.34
m64111_201213_171552_126682765_ccs	2	636	564	Lys	CTT	0	0	-30.48
m64111_201213_171552_126747996_ccs0	1	1259	1329	Gln	TTG	0	0	-29.06
m64111_201213_171552_126944314_ccs	1	3177	3249	Ser	GCT	0	0	-26.65
m64111_201213_171552_127337730_ccs	1	193	265	Asn	GTT	0	0	-28.82
m64111_201213_171552_127403205_ccs	1	3720	3790	Ala	TGC	0	0	-28.38
m64111_201213_171552_127403205_ccs	2	3330	3258	Arg	CCT	0	0	-28.26
m64111_201213_171552_127403744_ccs	1	6301	6373	Ser	GCT	0	0	-28.26
m64111_201213_171552_127403744_ccs	2	5656	5586	Asp	ATC	0	0	-31.07
m64111_201213_171552_127533647_ccs	1	648	720	Ser	GCT	0	0	-29.39
m64111_201213_171552_127731750_ccs	1	3594	3523	Val	GAC	0	0	-30.71
m64111_201213_171552_127732310_ccs	1	3790	3718	Ser	GCT	0	0	-28.26
m64111_201213_171552_47712457_ccs	1	3331	3402	Asn	GTT	0	0	-28.71
m64111_201213_171552_128058426_ccs	1	2412	2340	Lys	CTT	0	0	-25.36
m64111_201213_171552_128190615_ccs	1	5578	5506	Val	TAC	0	0	-31.49
m64111_201213_171552_128451228_ccs	1	667	594	Ser	ACT	0	0	-29.59
m64111_201213_171552_128452015_ccs	1	3161	3233	Ala	TGC	0	0	-24.52
m64111_201213_171552_128452777_ccs	1	3998	4069	Glu	TTC	0	0	-26.09
m64111_201213_171552_128453003_ccs	1	1598	1670	Ser	GCT	0	0	-28.26
m64111_201213_171552_128518677_ccs	1	1179	1251	Lys	CTT	0	0	-28.82
m64111_201213_171552_128518677_ccs	2	2461	2533	Glu	TTC	0	0	-25.04
m64111_201213_171552_128909321_ccs	1	4884	4812	Gly	TCC	0	0	-31.27
m64111_201213_171552_128909321_ccs	2	2395	2323	Thr	GGT	0	0	-28.26
m64111_201213_171552_128910952_ccs	1	5839	5767	Lys	CTT	0	0	-30.78
m64111_201213_171552_129108096_ccs	1	5754	5825	Ser	TGA	0	0	-29.73
m64111_201213_171552_129108096_ccs	2	8855	8925	Gln	TTG	0	0	-29.06
m64111_201213_171552_129370569_ccs	1	2381	2311	Glu	TTC	0	0	-27.57
m64111_201213_171552_129433972_ccs	1	9051	8979	Ser	GCT	0	0	-28.26
m64111_201213_171552_129435741_ccs	1	5258	5186	Ser	GCT	0	0	-23.81
m64111_201213_171552_129501270_ccs	1	4006	3934	Ser	GCT	0	0	-28.26
m64111_201213_171552_129565034_ccs0	1	2039	2111	Ala	AGC	0	0	-21.13
m64111_201213_171552_129565034_ccs01	1	716	788	Ala	AGC	0	0	-26.02
m64111_201213_171552_129827539_ccs	1	227	155	Ser	GCT	0	0	-28.95
m64111_201213_171552_129828317_ccs	1	542	614	Ser	GCT	0	0	-26.14
m64111_201213_171552_129960249_ccs0	1	1840	1912	Asn	GTT	0	0	-28.31
m64111_201213_171552_129960249_ccs01	1	1276	1348	Asn	GTT	0	0	-28.31
m64111_201213_171552_129960658_ccs	1	1528	1455	Ala	TGC	0	0	-30.82
m64111_201213_171552_130024247_ccs	1	3066	3136	Ala	GGC	0	0	-30.58
m64111_201213_171552_130089014_ccs	1	2988	2916	Asn	GTT	0	0	-28.26
m64111_201213_171552_130286487_ccs	1	204	132	Ser	GCT	0	0	-19.17
m64111_201213_171552_130418439_ccs	1	741	814	Lys	CTT	0	0	-25.67
m64111_201213_171552_130418439_ccs	2	128	57	Ala	GGC	0	0	-29.46
m64111_201213_171552_130614926_ccs	1	191	120	Thr	AGT	0	0	-24.13
m64111_201213_171552_131072302_ccs	1	239	311	Ser	GCT	0	0	-19.03
m64111_201213_171552_131072302_ccs	2	9557	9629	Ser	GCT	0	0	-27.77
m64111_201213_171552_131204669_ccs	1	856	928	Ser	GCT	0	0	-31.03
m64111_201213_171552_131271099_ccs	1	221	293	Ser	GCT	0	0	-22.86
m64111_201213_171552_131596328_ccs	1	3522	3447	Gly	GCC	0	0	-29.74
m64111_201213_171552_48106300_ccs	1	1275	1350	Gly	GCC	0	0	-29.74
m64111_201213_171552_131861006_ccs	1	1950	2021	Leu	CAA	0	0	-25.74
m64111_201213_171552_132254149_ccs	1	2142	2214	Ser	GCT	0	0	-30.97
m64111_201213_171552_132384028_ccs	1	1336	1264	Lys	CTT	0	0	-28.15
m64111_201213_171552_133171475_ccs	1	1928	1856	Ser	GCT	0	0	-27.66
m64111_201213_171552_133368372_ccs	1	497	567	***	TTA	0	0	-23.99
m64111_201213_171552_133497942_ccs	1	3505	3577	Ser	ACT	0	0	-31.48
m64111_201213_171552_133695996_ccs	1	7900	7827	Ser	GCT	0	0	-28.01
m64111_201213_171552_134153704_ccs	1	505	433	Asn	GTT	0	0	-26.65
m64111_201213_171552_134285631_ccs	1	3087	3159	Ser	GCT	0	0	-27.77
m64111_201213_171552_134415180_ccs	1	2210	2282	Lys	CTT	0	0	-26.87
m64111_201213_171552_134415180_ccs	2	2279	2351	Lys	CTT	0	0	-30.43
m64111_201213_171552_134415180_ccs	3	2348	2420	Lys	CTT	0	0	-30.43
m64111_201213_171552_8782792_ccs	1	1324	1396	His	GTG	0	0	-23.39
m64111_201213_171552_8783661_ccs	1	5421	5349	Lys	CTT	0	0	-31.08
m64111_201213_171552_8784734_ccs	1	2124	2052	Ser	GCT	0	0	-27.57
m64111_201213_171552_9372508_ccs	1	3239	3311	Ser	GCT	0	0	-28.26
m64111_201213_171552_9372771_ccs	1	6415	6343	Ser	GCT	0	0	-24.72
m64111_201213_171552_48563492_ccs	1	737	665	Asn	GTT	0	0	-28.26
m64111_201213_171552_48563722_ccs	1	1782	1711	Asn	ATT	0	0	-29.26
m64111_201213_171552_48565085_ccs	1	478	401	Arg	CCG	0	0	-29.93
m64111_201213_171552_9505046_ccs	1	852	924	Ser	GCT	0	0	-27.91
m64111_201213_171552_9766017_ccs	1	2241	2313	Ile	GAT	0	0	-27.57
m64111_201213_171552_9961665_ccs	1	1634	1558	Gln	CTG	0	0	-28.44
m64111_201213_171552_9961665_ccs	2	186	114	Asn	GTT	0	0	-19.97
m64111_201213_171552_10028851_ccs	1	1633	1704	Gly	CCC	0	0	-29.96
m64111_201213_171552_10094725_ccs	1	6481	6409	Lys	CTT	0	0	-25.04
m64111_201213_171552_10290936_ccs	1	394	323	Ala	AGC	0	0	-29.64
m64111_201213_171552_10420398_ccs	1	3833	3905	Lys	CTT	0	0	-31.45
m64111_201213_171552_10552924_ccs	1	5933	5862	Ala	AGC	0	0	-18.4
m64111_201213_171552_10618938_ccs	1	4484	4556	Lys	CTT	0	0	-31.03
m64111_201213_171552_10946279_ccs	1	2514	2442	Ser	GCT	0	0	-28.26
m64111_201213_171552_10946279_ccs	2	822	750	Ser	GCT	0	0	-28.26
m64111_201213_171552_11273975_ccs	1	3733	3663	Gln	TTG	0	0	-29.06
m64111_201213_171552_11274144_ccs	1	3014	2942	Lys	CTT	0	0	-29.31
m64111_201213_171552_11274905_ccs	1	2209	2281	Asn	GTT	0	0	-28.26
m64111_201213_171552_11274905_ccs	2	6945	6873	Ser	GCT	0	0	-28.26
m64111_201213_171552_11666792_ccs	1	2845	2917	Ser	GCT	0	0	-28.26
m64111_201213_171552_11667137_ccs	1	2088	2160	Ser	GCT	0	0	-31.53
m64111_201213_171552_12255567_ccs	1	2156	2084	Trp	CCA	0	0	-26.75
m64111_201213_171552_134677785_ccs	1	547	619	Lys	CTT	0	0	-25.81
m64111_201213_171552_134677785_ccs	2	5270	5342	Ala	AGC	0	0	-24.26
m64111_201213_171552_49020969_ccs	1	5625	5552	Ala	GGC	0	0	-27.63
m64111_201213_171552_134679285_ccs	1	5319	5392	Thr	AGT	0	0	-15.17
m64111_201213_171552_134679285_ccs	2	841	759	Leu	CAG	0	0	-19.66
m64111_201213_171552_134742857_ccs	1	2276	2348	Asn	GTT	0	0	-31.79
m64111_201213_171552_134742857_ccs	2	10470	10542	Lys	CTT	0	0	-23.08
m64111_201213_171552_134939509_ccs	1	1260	1331	Ala	TGC	0	0	-26.34
m64111_201213_171552_135332191_ccs	1	7442	7370	Ala	AGC	0	0	-24.23
m64111_201213_171552_135398051_ccs	1	968	1044	Ser	GCT	0	0	-24.55
m64111_201213_171552_135529101_ccs	1	1422	1253	Ser	AGA	0	0	-28.43
m64111_201213_171552_135530439_ccs	1	2874	2802	Asn	GTT	0	0	-26.14
m64111_201213_171552_135594801_ccs	1	194	124	Arg	CCT	0	0	-30.72
m64111_201213_171552_135661651_ccs	1	6454	6526	Phe	GAA	0	0	-27.92
m64111_201213_171552_135726116_ccs0	1	1458	1530	Ser	GCT	0	0	-28.95
m64111_201213_171552_135726116_ccs01	1	472	544	Ser	GCT	0	0	-28.95
m64111_201213_171552_135726964_ccs	1	2269	2199	Ala	AGC	0	0	-31.2
m64111_201213_171552_135792311_ccs	1	3094	3166	Ser	GCT	0	0	-31.72
m64111_201213_171552_135792376_ccs	1	4788	4716	Lys	CTT	0	0	-27.24
m64111_201213_171552_136120444_ccs	1	460	388	Asn	GTT	0	0	-29.4
m64111_201213_171552_136185954_ccs00	1	635	563	Asn	GTT	0	0	-27.59
m64111_201213_171552_136315135_ccs	1	12187	12115	Ser	GCT	0	0	-23.08
m64111_201213_171552_136317361_ccs	1	360	288	Ser	GCT	0	0	-27.69
m64111_201213_171552_136447526_ccs	1	4587	4659	Lys	CTT	0	0	-25.04
m64111_201213_171552_136839391_ccs	1	5668	5741	Ala	TGC	0	0	-28.28
m64111_201213_171552_136970493_ccs	1	4785	4713	Asn	GTT	0	0	-22.87
m64111_201213_171552_137365296_ccs	1	3492	3420	Asn	GTT	0	0	-27.77
m64111_201213_171552_137693361_ccs	1	2484	2560	Leu	CAA	0	0	-29.58
m64111_201213_171552_138218018_ccs	1	109	37	Lys	CTT	0	0	-24.04
m64111_201213_171552_138282397_ccs	1	2563	2491	Ser	GCT	0	0	-30.15
m64111_201213_171552_49154555_ccs	1	1399	1471	Ser	GCT	0	0	-28.26
m64111_201213_171552_49284275_ccs	1	404	475	Trp	CCA	0	0	-31.31
m64111_201213_171552_49350107_ccs	1	4373	4440	Gly	TCC	0	0	-28.51
m64111_201213_171552_49414176_ccs	1	3948	4019	Gln	TTG	0	0	-31.48
m64111_201213_171552_49414176_ccs	2	4405	4477	Asn	GTT	0	0	-28.45
m64111_201213_171552_394912_ccs	1	5059	4988	Lys	CTT	0	0	-30.04
m64111_201213_171552_138479192_ccs	1	3902	3830	Ser	GCT	0	0	-29.14
m64111_201213_171552_139003107_ccs	1	3330	3258	Asn	GTT	0	0	-25.54
m64111_201213_171552_139003107_ccs	2	2621	2549	Lys	CTT	0	0	-28.26
m64111_201213_171552_139003466_ccs	1	2220	2149	Ile	AAT	0	0	-21.24
m64111_201213_171552_139266519_ccs	1	4564	4492	Gly	TCC	0	0	-20.35
m64111_201213_171552_139395750_ccs	1	3789	3861	Gln	CTG	0	0	-25.85
m64111_201213_171552_139396593_ccs	1	1902	1830	Arg	TCT	0	0	-28.26
m64111_201213_171552_139460671_ccs	1	5762	5831	Val	AAC	0	0	-25.83
m64111_201213_171552_139460741_ccs	1	6513	6441	Ser	GCT	0	0	-23.81
m64111_201213_171552_139657892_ccs	1	1016	1088	Thr	AGT	0	0	-24.39
m64111_201213_171552_139856069_ccs	1	1115	1187	Asn	GTT	0	0	-27.57
m64111_201213_171552_139919411_ccs	1	11321	11391	Ser	TGA	0	0	-29.73
m64111_201213_171552_139919411_ccs	2	14418	14488	Gln	TTG	0	0	-29.06
m64111_201213_171552_140116579_ccs	1	2949	2877	Tyr	ATA	0	0	-29.14
m64111_201213_171552_140117774_ccs	1	2749	2821	Trp	CCA	0	0	-31.4
m64111_201213_171552_140118646_ccs	1	3168	3095	Asn	GTT	0	0	-19.32
m64111_201213_171552_140118646_ccs	2	2278	2207	His	GTG	0	0	-24.3
m64111_201213_171552_140182483_ccs	1	6027	6099	Ser	GCT	0	0	-29.82
m64111_201213_171552_140184321_ccs	1	1304	1376	Ser	GCT	0	0	-31.68
m64111_201213_171552_140249049_ccs	1	5513	5585	Gly	TCC	0	0	-29.18
m64111_201213_171552_140315237_ccs	1	125	54	Ala	TGC	0	0	-23.72
m64111_201213_171552_140576384_ccs	1	320	390	Thr	TGT	0	0	-27.31
m64111_201213_171552_140642200_ccs	1	3589	3517	Asn	GTT	0	0	-28.24
m64111_201213_171552_140707650_ccs	1	322	392	Gln	TTG	0	0	-29.06
m64111_201213_171552_140707650_ccs	2	12020	11950	Ser	TGA	0	0	-29.73
m64111_201213_171552_140773318_ccs	1	4376	4304	Asn	GTT	0	0	-26.65
m64111_201213_171552_140968086_ccs	1	2504	2576	Ser	GCT	0	0	-28.26
m64111_201213_171552_140968086_ccs	2	2782	2854	Asn	GTT	0	0	-27.61
m64111_201213_171552_140968086_ccs	3	995	916	Gln	CTG	0	0	-25.58
m64111_201213_171552_140968102_ccs	1	392	320	Gly	ACC	0	0	-26.64
m64111_201213_171552_141035017_ccs	1	5744	5672	Ser	GCT	0	0	-22.87
m64111_201213_171552_141821102_ccs	1	509	437	Ser	GCT	0	0	-28.26
m64111_201213_171552_49545518_ccs	1	1890	1962	Lys	CTT	0	0	-26.87
m64111_201213_171552_49677684_ccs	1	642	714	Asn	GTT	0	0	-28.26
m64111_201213_171552_49742500_ccs	1	3133	3061	Asn	GTT	0	0	-27.51
m64111_201213_171552_49742500_ccs	2	1729	1653	Gln	CTG	0	0	-29.59
m64111_201213_171552_141951764_ccs	1	1580	1652	Asp	ATC	0	0	-31.1
m64111_201213_171552_142084204_ccs	1	4033	3961	Ser	GCT	0	0	-27.22
m64111_201213_171552_142411390_ccs	1	3974	3904	Ser	GCT	0	0	-27.83
m64111_201213_171552_142542051_ccs0	1	409	481	Ser	GCT	0	0	-28.26
m64111_201213_171552_142542051_ccs0	2	985	1050	Thr	AGT	0	0	-28.29
m64111_201213_171552_142543385_ccs	1	2625	2697	Ser	GCT	0	0	-23.91
m64111_201213_171552_142543385_ccs	2	100	31	Ala	GGC	0	0	-24.55
m64111_201213_171552_142869960_ccs	1	1638	1710	Lys	CTT	0	0	-29.88
m64111_201213_171552_143001755_ccs	1	2874	2802	Asn	GTT	0	0	-27.06
m64111_201213_171552_143198594_ccs	1	1189	1117	Gln	CTG	0	0	-31.39
m64111_201213_171552_143395382_ccs0	1	734	659	Phe	GAA	0	0	-31.67
m64111_201213_171552_143395382_ccs01	1	122	47	Phe	GAA	0	0	-31.67
m64111_201213_171552_143917335_ccs	1	2516	2444	Ser	GCT	0	0	-31.16
m64111_201213_171552_144114629_ccs	1	6898	6828	Ser	TGA	0	0	-29.73
m64111_201213_171552_144311480_ccs01	1	5627	5540	Lys	CTT	0	0	-29.98
m64111_201213_171552_144311996_ccs	1	1870	1942	Lys	TTT	0	0	-23.17
m64111_201213_171552_144311996_ccs	2	4040	4112	Ser	GCT	0	0	-28.21
m64111_201213_171552_144703488_ccs	1	3993	4065	***	TTA	0	0	-28.66
m64111_201213_171552_145294085_ccs	1	9247	9175	Lys	CTT	0	0	-25.04
m64111_201213_171552_145491189_ccs	1	4256	4186	Ala	AGC	0	0	-28.4
m64111_201213_171552_145491257_ccs0	1	887	815	Ala	TGC	0	0	-28.95
m64111_201213_171552_145491257_ccs01	1	509	437	Ala	TGC	0	0	-28.95
m64111_201213_171552_49939754_ccs	1	1073	1145	Thr	AGT	0	0	-25.68
m64111_201213_171552_50005833_ccs	1	2129	2200	Tyr	GTA	0	0	-28.04
m64111_201213_171552_50070452_ccs0	1	2218	2290	Arg	CCT	0	0	-23.37
[truncated: 3,391 more rows]

## Sheet: S5
Table S5: Control Day 12 tRNA. Full details of transfer RNA annotation.
Sequence	Number of tRNA	tRNA Start	tRNA End	tRNA Type	Anticodon	Intron Begin	Intron End	Score
m64111_201213_171552_76283921_ccs	0	3129	3201	Arg	CCT	0	0	-30.23
m64111_201213_171552_76351973_ccs	1	3263	3332	Met	CAT	0	0	-31.02
m64111_201213_171552_77268889_ccs	1	3141	3070	Ala	GGC	0	0	-24.93
m64111_201213_171552_77333690_ccs	1	5364	5293	Leu	TAA	0	0	-25.49
m64111_201213_171552_78316280_ccs	1	380	452	Arg	TCT	0	0	-28.8
m64111_201213_171552_78710727_ccs	1	234	162	Asn	GTT	0	0	-24.64
m64111_201213_171552_2688377_ccs	1	3500	3572	Gly	TCC	0	0	-27.43
m64111_201213_171552_79233288_ccs	1	620	548	Gly	TCC	0	0	-31.22
m64111_201213_171552_79430143_ccs	1	365	293	Ser	GCT	0	0	-31.7
m64111_201213_171552_79496549_ccs	1	1184	1109	Leu	TAG	0	0	-26.34
m64111_201213_171552_80349575_ccs	1	2031	2103	Ser	ACT	0	0	-25.45
m64111_201213_171552_80872150_ccs	1	838	767	Thr	GGT	0	0	-29.11
m64111_201213_171552_82184531_ccs	1	3001	2930	Ser	AGA	0	0	-29.56
m64111_201213_171552_84739033_ccs	1	2477	2548	Ser	GCT	0	0	-31.71
m64111_201213_171552_85525612_ccs	1	1780	1852	Trp	AAA	0	0	-28.28
m64111_201213_171552_3082025_ccs	1	644	716	Lys	CTT	0	0	-31.05
m64111_201213_171552_86901097_ccs	1	1937	2009	Gly	GCC	0	0	-31.53
m64111_201213_171552_87426197_ccs	1	3074	3002	Asn	GTT	0	0	-25.71
m64111_201213_171552_88278103_ccs	1	2168	2095	Gly	TCC	0	0	-29.41
m64111_201213_171552_88802884_ccs	1	5738	5668	Gln	TTG	0	0	-29.06
m64111_201213_171552_88999269_ccs	1	839	911	Ser	GCT	0	0	-30.57
m64111_201213_171552_89130568_ccs	1	5424	5352	Ser	GCT	0	0	-31.14
m64111_201213_171552_89325791_ccs	1	7839	7767	Ser	GCT	0	0	-28.01
m64111_201213_171552_4523197_ccs	1	3590	3662	***	CTA	0	0	-31.14
m64111_201213_171552_6228282_ccs	1	3540	3468	Gly	TCC	0	0	-23.7
m64111_201213_171552_7210466_ccs	1	2464	2537	Arg	CCT	0	0	-26.78
m64111_201213_171552_7799703_ccs	1	5584	5512	Ser	GCT	0	0	-26.95
m64111_201213_171552_89524248_ccs	1	4313	4384	Ala	AGC	0	0	-22.12
m64111_201213_171552_89524248_ccs	2	5833	5905	Ser	GCT	0	0	-29.71
m64111_201213_171552_89983744_ccs	1	1363	1435	Gly	TCC	0	0	-25.08
m64111_201213_171552_91163224_ccs0	1	592	664	Asn	GTT	0	0	-30.81
m64111_201213_171552_4064386_ccs01	1	198	126	Gly	ACC	0	0	-31
m64111_201213_171552_94438729_ccs	1	3085	3013	Ser	GCT	0	0	-23.08
m64111_201213_171552_94765802_ccs	1	1846	1918	Asn	GTT	0	0	-22.87
m64111_201213_171552_94765802_ccs	2	3293	3221	Ser	GCT	0	0	-28.31
m64111_201213_171552_95552184_ccs	1	926	996	Gln	TTG	0	0	-29.06
m64111_201213_171552_44435181_ccs	1	9160	9088	Gly	TCC	0	0	-29.15
m64111_201213_171552_44436198_ccs	1	2420	2348	Asn	GTT	0	0	-24.3
m64111_201213_171552_96469171_ccs0	1	269	342	Trp	CCA	0	0	-28.68
m64111_201213_171552_96469171_ccs01	1	324	390	Trp	CCA	0	0	-23.96
m64111_201213_171552_98764855_ccs	1	1886	1958	Ser	GCT	0	0	-24.64
m64111_201213_171552_99091366_ccs	1	221	293	Ser	GCT	0	0	-29.75
m64111_201213_171552_44761491_ccs	1	1563	1633	Ala	GGC	0	0	-28
m64111_201213_171552_100993271_ccs	1	578	504	Val	GAC	0	0	-28.31
m64111_201213_171552_101319618_ccs	1	1618	1546	Lys	CTT	0	0	-29
m64111_201213_171552_102827200_ccs	1	136	63	Ser	GCT	0	0	-23.37
m64111_201213_171552_103743537_ccs0	1	429	357	Ala	TGC	0	0	-31.71
m64111_201213_171552_103743537_ccs0101	1	245	173	Ala	TGC	0	0	-31.71
m64111_201213_171552_103810012_ccs	1	5544	5616	Ser	GCT	0	0	-29.99
m64111_201213_171552_106169888_ccs	1	1236	1308	***	TCA	0	0	-24.31
m64111_201213_171552_107021708_ccs	1	72	144	Ser	GCT	0	0	-30.48
m64111_201213_171552_107743997_ccs00000	1	2837	2908	Gly	TCC	0	0	-28.55
m64111_201213_171552_111477640_ccs	1	2229	2301	Asn	GTT	0	0	-28.26
m64111_201213_171552_113444808_ccs	1	2002	2074	Lys	TTT	0	0	-24.3
m64111_201213_171552_113511087_ccs	1	23	94	Arg	TCT	0	0	-29.28
m64111_201213_171552_114035186_ccs	1	5384	5456	Gly	GCC	0	0	-29.98
m64111_201213_171552_114035186_ccs	2	1299	1227	Asn	GTT	0	0	-27.57
m64111_201213_171552_114035186_ccs	3	85	11	Asn	GTT	0	0	-22.45
m64111_201213_171552_114689967_ccs	1	3127	3055	Lys	CTT	0	0	-30.83
m64111_201213_171552_114689967_ccs	2	2765	2693	Asn	GTT	0	0	-28.26
m64111_201213_171552_46139397_ccs	1	357	286	Ala	AGC	0	0	-29.67
m64111_201213_171552_116132573_ccs0	1	387	315	Ser	GCT	0	0	-28.26
m64111_201213_171552_116720135_ccs	1	5084	5013	Ala	AGC	0	0	-27.06
m64111_201213_171552_118949582_ccs	1	5545	5473	Ala	TGC	0	0	-31.57
m64111_201213_171552_120848778_ccs	1	4210	4282	Asn	GTT	0	0	-28.26
m64111_201213_171552_121176363_ccs	1	4276	4353	Ala	GGC	0	0	-26.54
m64111_201213_171552_121176505_ccs	1	2354	2282	Asn	GTT	0	0	-26.65
m64111_201213_171552_121241757_ccs	1	2455	2525	Pro	GGG	0	0	-23.47
m64111_201213_171552_121765958_ccs	1	1263	1335	Asn	GTT	0	0	-26.81
m64111_201213_171552_123404375_ccs0	1	198	270	Ser	GCT	0	0	-23.37
m64111_201213_171552_123404375_ccs01	1	14	87	Ser	GCT	0	0	-28.26
m64111_201213_171552_123404375_ccs01	2	373	445	Ser	GCT	0	0	-23.55
m64111_201213_171552_123404496_ccs	1	2202	2274	Ser	GCT	0	0	-28.26
m64111_201213_171552_123404496_ccs	2	409	337	Ser	GCT	0	0	-30.48
m64111_201213_171552_125437700_ccs	1	7536	7464	Lys	CTT	0	0	-25.56
m64111_201213_171552_125504056_ccs01	1	1007	1079	Ser	GCT	0	0	-26.65
m64111_201213_171552_127011549_ccs	1	2905	2978	Tyr	ATA	0	0	-31.26
m64111_201213_171552_47450584_ccs	1	2219	2291	Ser	GCT	0	0	-30.73
m64111_201213_171552_128649384_ccs	1	69	1	Val	TAC	0	0	-26.45
m64111_201213_171552_129042416_ccs	1	4599	4527	Thr	GGT	0	0	-27.57
m64111_201213_171552_129042416_ccs	2	3121	3049	Ser	GCT	0	0	-28.26
m64111_201213_171552_129171946_ccs	1	589	517	Val	TAC	0	0	-28.3
m64111_201213_171552_129304144_ccs	1	1549	1620	Ala	GGC	0	0	-24.54
m64111_201213_171552_129304144_ccs	2	1269	1196	Gln	CTG	0	0	-31.38
m64111_201213_171552_129828571_ccs	1	222	294	Ala	AGC	0	0	-25.22
m64111_201213_171552_130023492_ccs	1	574	499	Ala	GGC	0	0	-29.07
m64111_201213_171552_132581820_ccs	1	8506	8435	Val	CAC	0	0	-31.66
m64111_201213_171552_132646238_ccs	1	786	858	Ser	ACT	0	0	-28.26
m64111_201213_171552_9701920_ccs01	1	2463	2391	Ser	GCT	0	0	-28.48
m64111_201213_171552_9830872_ccs0	1	1523	1451	Thr	TGT	0	0	-30.92
m64111_201213_171552_10158146_ccs	1	751	680	Ala	AGC	0	0	-25.2
m64111_201213_171552_10291069_ccs	1	228	298	Gln	TTG	0	0	-29.06
m64111_201213_171552_10291069_ccs	2	4039	3969	Ser	TGA	0	0	-29.73
m64111_201213_171552_10554123_ccs	1	4746	4834	Ile	AAT	0	0	-28.88
m64111_201213_171552_10881746_ccs	1	710	638	Ser	GCT	0	0	-28.26
m64111_201213_171552_11862602_ccs	1	964	892	Ser	GCT	0	0	-25.12
m64111_201213_171552_135922987_ccs	1	1098	1026	Gly	GCC	0	0	-28.23
m64111_201213_171552_136252131_ccs	1	166	94	Ser	GCT	0	0	-28.95
m64111_201213_171552_136577994_ccs	1	2072	2143	Glu	CTC	0	0	-27.07
m64111_201213_171552_136579905_ccs	1	1311	1383	Lys	CTT	0	0	-24.69
m64111_201213_171552_137298761_ccs	1	9109	9038	Ala	AGC	0	0	-31.1
m64111_201213_171552_139070122_ccs	1	248	320	Ser	GCT	0	0	-23.37
m64111_201213_171552_139658955_ccs	1	4663	4589	Thr	TGT	0	0	-24.71
m64111_201213_171552_49676835_ccs	1	5537	5608	Trp	CCA	0	0	-31.66
m64111_201213_171552_143198423_ccs	1	3156	3086	Ala	AGC	0	0	-29.94
m64111_201213_171552_143524347_ccs	1	2850	2778	Ser	GCT	0	0	-26.86
m64111_201213_171552_146670323_ccs	1	805	733	Ala	AGC	0	0	-25.3
m64111_201213_171552_50333552_ccs	1	2886	2814	Ser	GCT	0	0	-28.26
m64111_201213_171552_149161426_ccs0	1	1197	1269	Gly	TCC	0	0	-29.97
m64111_201213_171552_149161426_ccs01	1	233	305	Gly	TCC	0	0	-29.97
m64111_201213_171552_149292412_ccs	1	1675	1751	Gln	CTG	0	0	-19.88
m64111_201213_171552_149292412_ccs	2	7278	7350	Lys	CTT	0	0	-27.56
m64111_201213_171552_149554704_ccs01	1	2934	3006	Gly	ACC	0	0	-30.12
m64111_201213_171552_150930072_ccs	1	2771	2841	Lys	CTT	0	0	-24.82
m64111_201213_171552_150997237_ccs	1	2678	2750	Ser	ACT	0	0	-30.46
m64111_201213_171552_150997237_ccs	2	3490	3418	Ser	GCT	0	0	-28.26
m64111_201213_171552_154141698_ccs	1	10906	10836	Ser	TGA	0	0	-29.73
m64111_201213_171552_154141698_ccs	2	7801	7731	Gln	TTG	0	0	-29.06
m64111_201213_171552_155452498_ccs	1	4147	4075	Ser	GCT	0	0	-30.34
m64111_201213_171552_50727751_ccs	1	1358	1430	Gly	TCC	0	0	-27.78
m64111_201213_171552_158468799_ccs0101	1	108	36	His	GTG	0	0	-31.2
m64111_201213_171552_158793985_ccs	1	3822	3893	Ala	AGC	0	0	-31.53
m64111_201213_171552_159910541_ccs0	1	356	285	Val	AAC	0	0	-27.77
m64111_201213_171552_160368521_ccs01	1	2302	2374	Gly	ACC	0	0	-31
m64111_201213_171552_163447913_ccs	1	3800	3872	Asn	ATT	0	0	-27.54
m64111_201213_171552_164956156_ccs	1	310	240	Ser	TGA	0	0	-29.73
m64111_201213_171552_165153324_ccs	1	364	292	Gly	TCC	0	0	-29.47
m64111_201213_171552_165611012_ccs	1	3781	3854	Cys	ACA	0	0	-28.34
m64111_201213_171552_165611012_ccs	2	483	411	Ala	AGC	0	0	-28.7
m64111_201213_171552_165675313_ccs	1	1880	1808	Ser	GCT	0	0	-28.26
m64111_201213_171552_165807519_ccs	1	824	752	Ser	GCT	0	0	-27.57
m64111_201213_171552_51644682_ccs	1	1907	1979	Asn	GTT	0	0	-26.65
m64111_201213_171552_168821695_ccs	1	913	841	Lys	CTT	0	0	-28.26
m64111_201213_171552_170590487_ccs	1	3121	3192	Thr	GGT	0	0	-25.74
m64111_201213_171552_171311579_ccs	1	2972	2902	Ser	GCT	0	0	-31.04
m64111_201213_171552_171311579_ccs	2	2592	2520	Ser	ACT	0	0	-31.51
m64111_201213_171552_172621862_ccs	1	1532	1603	Gly	TCC	0	0	-23.85
m64111_201213_171552_172621862_ccs	2	3662	3738	Ser	GCT	0	0	-24.55
m64111_201213_171552_173606682_ccs0	1	617	543	Thr	TGT	0	0	-31.33
m64111_201213_171552_173606682_ccs01	1	76	2	Thr	TGT	0	0	-26.44
m64111_201213_171552_174457427_ccs	1	549	621	Lys	CTT	0	0	-27.57
m64111_201213_171552_52497090_ccs	1	4193	4121	Asn	GTT	0	0	-28.26
m64111_201213_171552_176227359_ccs	1	6544	6687	Ala	AGC	0	0	-29.63
m64111_201213_171552_177343326_ccs	1	461	532	Ala	AGC	0	0	-20.86
m64111_201213_171552_177343326_ccs	2	2156	2084	Ser	GCT	0	0	-30.8
m64111_201213_171552_180421717_ccs	1	1969	1896	Ala	GGC	0	0	-28.22
m64111_201213_171552_16581994_ccs0	1	672	744	Ile	GAT	0	0	-28.98
m64111_201213_171552_19794534_ccs	1	2026	2098	Ser	GCT	0	0	-27.57
m64111_201213_171552_19794534_ccs	2	1538	1467	Ala	AGC	0	0	-30.54
m64111_201213_171552_20318473_ccs0	1	635	563	Ser	GCT	0	0	-30.22
m64111_201213_171552_20318473_ccs01	1	357	285	Ser	GCT	0	0	-30.22
m64111_201213_171552_21430492_ccs	1	980	908	Ser	GCT	0	0	-21.88
m64111_201213_171552_21823670_ccs	1	946	1018	Lys	CTT	0	0	-30.5
m64111_201213_171552_22020845_ccs00	1	7270	7341	Thr	TGT	0	0	-27.84
m64111_201213_171552_23529720_ccs	1	1847	1776	Lys	TTT	0	0	-26.78
m64111_201213_171552_23659132_ccs	1	2477	2549	Ser	ACT	0	0	-30.03
m64111_201213_171552_24315635_ccs	1	4177	4102	Gly	GCC	0	0	-29.74
m64111_201213_171552_26804746_ccs	1	4347	4275	Ser	GCT	0	0	-28.26
m64111_201213_171552_26804746_ccs	2	3977	3905	Ser	GCT	0	0	-28.26
m64111_201213_171552_28904235_ccs	1	1657	1587	Ser	TGA	0	0	-29.73
m64111_201213_171552_29427075_ccs0	1	238	166	Arg	CCT	0	0	-31.34
m64111_201213_171552_29493451_ccs	1	2040	2113	Val	TAC	0	0	-31.77
m64111_201213_171552_29951309_ccs	1	1142	1070	Asn	ATT	0	0	-22.87
m64111_201213_171552_30017631_ccs	1	10522	10452	Gln	TTG	0	0	-29.06
m64111_201213_171552_30214014_ccs	1	3304	3376	Ser	GCT	0	0	-28.26
m64111_201213_171552_30344637_ccs	1	3802	3730	Lys	CTT	0	0	-31.53
m64111_201213_171552_30607515_ccs	1	2843	2771	Tyr	GTA	0	0	-28.95
m64111_201213_171552_31196380_ccs0	1	6389	6461	Ser	ACT	0	0	-28.82
m64111_201213_171552_31328593_ccs	1	2853	2925	Lys	CTT	0	0	-30.48
m64111_201213_171552_33620001_ccs	1	129	57	Ser	GCT	0	0	-26.48
m64111_201213_171552_37619523_ccs	1	3113	3185	Ser	GCT	0	0	-28.26
m64111_201213_171552_37619523_ccs	2	1376	1304	Ser	GCT	0	0	-28.26
m64111_201213_171552_39783235_ccs	1	458	386	Ser	GCT	0	0	-28.17
m64111_201213_171552_56034688_ccs	1	255	327	Ser	GCT	0	0	-28.26
m64111_201213_171552_56034688_ccs	2	1323	1395	Asn	GTT	0	0	-28.26
m64111_201213_171552_56166720_ccs0	1	1245	1173	Ser	GCT	0	0	-28.26
m64111_201213_171552_56166720_ccs01	1	582	510	Ser	GCT	0	0	-28.26
m64111_201213_171552_43190895_ccs	1	4979	4909	Ser	ACT	0	0	-30.05
m64111_201213_171552_43517536_ccs	1	3787	3715	Lys	CTT	0	0	-30.04
m64111_201213_171552_56887629_ccs	1	291	363	Glu	CTC	0	0	-30.61
m64111_201213_171552_56952880_ccs	1	3014	3083	Ala	AGC	0	0	-26.49
m64111_201213_171552_63702763_ccs	1	2097	2169	Lys	TTT	0	0	-28.54
m64111_201213_171552_63832139_ccs	1	23	95	Ser	GCT	0	0	-26.09
m64111_201213_171552_64031078_ccs	1	388	316	Thr	GGT	0	0	-26.09
m64111_201213_171552_65275170_ccs	1	1465	1537	Asn	GTT	0	0	-28.26
m64111_201213_171552_66587388_ccs0	1	321	392	Ala	AGC	0	0	-22.28
m64111_201213_171552_66587388_ccs01	1	486	553	Ala	AGC	0	0	-17.39
m64111_201213_171552_66847879_ccs	1	3063	3135	Lys	TTT	0	0	-28.26
m64111_201213_171552_67438199_ccs	1	1573	1643	Ser	TGA	0	0	-29.73
m64111_201213_171552_67438199_ccs	2	4674	4744	Gln	TTG	0	0	-29.06
m64111_201213_171552_68551271_ccs	1	930	1002	Gly	TCC	0	0	-26.5
m64111_201213_171552_68551271_ccs	2	3249	3321	Ser	GCT	0	0	-30.22
m64111_201213_171552_68880987_ccs	1	2683	2755	Gly	GCC	0	0	-28.26
m64111_201213_171552_68880987_ccs	2	3225	3297	Ser	GCT	0	0	-27.57
m64111_201213_171552_68880987_ccs	3	3458	3530	Asn	ATT	0	0	-25.25
m64111_201213_171552_68880987_ccs	4	5853	5925	Ser	GCT	0	0	-28.26
m64111_201213_171552_69010510_ccs	1	3119	3191	Arg	TCT	0	0	-28.26
m64111_201213_171552_69011522_ccs	1	3225	3298	Leu	AAG	0	0	-27.59
m64111_201213_171552_69666524_ccs	1	2261	2333	Ser	GCT	0	0	-28.26
m64111_201213_171552_2294642_ccs	1	6474	6404	Gln	TTG	0	0	-29.06
m64111_201213_171552_72877056_ccs	1	1708	1778	Ser	TGA	0	0	-29.73
m64111_201213_171552_72877056_ccs	2	4810	4880	Gln	TTG	0	0	-29.06
m64111_201213_171552_72877857_ccs	1	10876	10804	Cys	ACA	0	0	-25.57
m64111_201213_171552_73139781_ccs0	1	620	744	Thr	TGT	0	0	-30.84
m64111_201213_171552_73271218_ccs	1	3243	3171	Ser	GCT	0	0	-27.29
m64111_201213_171552_73336993_ccs	1	5151	5222	Lys	CTT	0	0	-28.84
m64111_201213_171552_73337673_ccs	1	2065	1993	Lys	CTT	0	0	-28.26
m64111_201213_171552_74320220_ccs0	1	340	268	Ala	TGC	0	0	-31.18
m64111_201213_171552_74320220_ccs01	1	474	402	Ala	TGC	0	0	-31.18
m64111_201213_171552_75303338_ccs	1	2810	2738	Asn	ATT	0	0	-25.55
m64111_201213_171552_75303383_ccs	1	329	400	Leu	CAA	0	0	-19.8
m64111_201213_171552_2360734_ccs	1	1439	1367	Lys	CTT	0	0	-31.47
m64111_201213_171552_45809685_ccs	1	5214	5142	Ala	AGC	0	0	-21.88
m64111_201213_171552_272_ccs	1	1103	1176	Tyr	GTA	0	0	-31.32
m64111_201213_171552_106759394_ccs	1	6028	6098	Gly	TCC	0	0	-25.86
m64111_201213_171552_106759394_ccs	2	6994	6922	Val	AAC	0	0	-22.87
m64111_201213_171552_107152084_ccs	1	1828	1903	Leu	TAG	0	0	-29.97
m64111_201213_171552_107481453_ccs	1	6517	6446	Asp	ATC	0	0	-24.74
m64111_201213_171552_107544984_ccs0	1	943	870	Lys	TTT	0	0	-28.07
m64111_201213_171552_107544984_ccs01	1	125	52	Lys	TTT	0	0	-23.18
m64111_201213_171552_107546651_ccs	1	409	479	Ser	TGA	0	0	-29.73
m64111_201213_171552_107546651_ccs	2	8373	8303	Gln	TTG	0	0	-29.06
m64111_201213_171552_107611988_ccs	1	582	652	Ser	TGA	0	0	-29.73
m64111_201213_171552_107611988_ccs	2	3681	3751	Gln	TTG	0	0	-29.06
m64111_201213_171552_107677696_ccs	1	4632	4704	Ser	GCT	0	0	-28.31
m64111_201213_171552_107677696_ccs	2	5685	5613	Lys	CTT	0	0	-28.68
m64111_201213_171552_107807649_ccs	1	3962	4034	Ser	GCT	0	0	-28.26
m64111_201213_171552_107873101_ccs	1	2703	2773	Val	CAC	0	0	-29.57
m64111_201213_171552_108137174_ccs	1	3390	3318	Lys	CTT	0	0	-27.92
m64111_201213_171552_108464546_ccs	1	307	381	Ala	GGC	0	0	-30.48
m64111_201213_171552_108530428_ccs	1	8852	8782	Ser	TGA	0	0	-29.73
m64111_201213_171552_108530428_ccs	2	5751	5681	Gln	TTG	0	0	-29.06
m64111_201213_171552_109118245_ccs0	1	1322	1407	Thr	CGT	0	0	-30.59
m64111_201213_171552_109118245_ccs01	1	1085	1170	Thr	CGT	0	0	-30.58
m64111_201213_171552_109249791_ccs0	1	355	283	Pro	TGG	0	0	-24.68
m64111_201213_171552_109249791_ccs01	1	1418	1346	Pro	TGG	0	0	-24.68
m64111_201213_171552_109314308_ccs	1	2057	2129	Ser	GCT	0	0	-28.26
m64111_201213_171552_109380240_ccs	1	2144	2072	Asn	GTT	0	0	-29.52
m64111_201213_171552_109380936_ccs	1	767	695	Asn	GTT	0	0	-25.9
m64111_201213_171552_109446712_ccs	1	3433	3361	Ser	GCT	0	0	-23.08
m64111_201213_171552_109774132_ccs	1	2333	2406	Asn	GTT	0	0	-28.26
m64111_201213_171552_109970036_ccs	1	6376	6448	Ser	GCT	0	0	-25.04
m64111_201213_171552_2623182_ccs	1	982	1054	Asn	GTT	0	0	-28.09
m64111_201213_171552_110231725_ccs	1	3785	3858	Tyr	ATA	0	0	-27.24
m64111_201213_171552_46270503_ccs	1	5947	5875	Gly	ACC	0	0	-31.22
m64111_201213_171552_110494726_ccs	1	5124	5053	Tyr	GTA	0	0	-20.96
m64111_201213_171552_110494726_ccs	2	2540	2469	Lys	CTT	0	0	-27.8
m64111_201213_171552_110494726_ccs	3	1230	1158	Ser	ACT	0	0	-28.26
m64111_201213_171552_110758168_ccs	1	1106	1034	Leu	GAG	0	0	-29.74
m64111_201213_171552_110822422_ccs	1	2881	2951	Gln	TTG	0	0	-29.06
m64111_201213_171552_110822422_ccs	2	16083	16153	Ser	TGA	0	0	-29.73
m64111_201213_171552_110887644_ccs	1	3021	3093	Asn	GTT	0	0	-20.15
m64111_201213_171552_110953616_ccs	1	2551	2625	Ile	TAT	0	0	-29.08
m64111_201213_171552_111018134_ccs0	1	169	97	Ser	GCT	0	0	-24.88
m64111_201213_171552_111018134_ccs01	1	711	639	Ser	GCT	0	0	-29.77
m64111_201213_171552_111217372_ccs	1	1031	1103	Ala	TGC	0	0	-28.38
m64111_201213_171552_111346208_ccs	1	3603	3531	Ser	GCT	0	0	-24.21
m64111_201213_171552_112461785_ccs	1	5057	5128	Ser	GGA	0	0	-27.22
m64111_201213_171552_112723804_ccs	1	1701	1770	Gly	ACC	0	0	-27.61
m64111_201213_171552_112789840_ccs	1	2587	2515	Asn	ATT	0	0	-23.77
m64111_201213_171552_113509447_ccs	1	8515	8443	Ser	GCT	0	0	-25.04
m64111_201213_171552_113510641_ccs	1	3714	3784	Ser	TGA	0	0	-29.73
m64111_201213_171552_113707514_ccs	1	1272	1344	Asn	GTT	0	0	-28.26
m64111_201213_171552_79102154_ccs	1	5726	5654	Ser	GCT	0	0	-28.26
m64111_201213_171552_79102154_ccs	2	1602	1530	Ser	GCT	0	0	-28.26
m64111_201213_171552_113903116_ccs	1	4141	4069	Lys	CTT	0	0	-31.49
m64111_201213_171552_46466523_ccs	1	5702	5774	Ser	GCT	0	0	-26.14
m64111_201213_171552_46597140_ccs	1	1040	969	Gly	TCC	0	0	-30.48
m64111_201213_171552_114099533_ccs	1	6213	6141	Ser	ACT	0	0	-30.49
m64111_201213_171552_114230751_ccs	1	1873	1945	Lys	TTT	0	0	-31.47
m64111_201213_171552_114557267_ccs	1	1532	1604	Ala	AGC	0	0	-28.92
m64111_201213_171552_114558329_ccs	1	2175	2246	Ala	AGC	0	0	-24.48
m64111_201213_171552_114624125_ccs	1	1587	1659	Ala	GGC	0	0	-29.14
m64111_201213_171552_114688643_ccs	1	3355	3283	Asn	GTT	0	0	-27.87
m64111_201213_171552_114755492_ccs	1	3604	3676	Gly	TCC	0	0	-26.91
m64111_201213_171552_114821719_ccs	1	4565	4493	Thr	GGT	0	0	-26.09
m64111_201213_171552_115148300_ccs	1	7849	7778	Ala	TGC	0	0	-28.52
m64111_201213_171552_115148300_ccs	2	6765	6694	His	GTG	0	0	-27.25
m64111_201213_171552_115214404_ccs	1	353	423	Gln	TTG	0	0	-29.06
m64111_201213_171552_115214404_ccs	2	4842	4772	Ser	TGA	0	0	-29.73
m64111_201213_171552_115409232_ccs	1	1600	1672	Ile	AAT	0	0	-20.71
m64111_201213_171552_115671199_ccs	1	1305	1375	Gln	TTG	0	0	-29.06
m64111_201213_171552_115802911_ccs	1	7660	7732	Glu	CTC	0	0	-29.06
m64111_201213_171552_115868020_ccs	1	12799	12728	Ser	TGA	0	0	-29.73
m64111_201213_171552_115868020_ccs	2	9698	9628	Gln	TTG	0	0	-29.06
m64111_201213_171552_115933461_ccs	1	826	898	Ser	GCT	0	0	-30
m64111_201213_171552_116261758_ccs	1	320	392	Ser	GCT	0	0	-30.97
m64111_201213_171552_116329005_ccs	1	176	104	Ser	GCT	0	0	-25.33
m64111_201213_171552_116393215_ccs	1	4557	4627	Ser	TGA	0	0	-29.73
m64111_201213_171552_116393215_ccs	2	9164	9094	Gln	TTG	0	0	-29.06
m64111_201213_171552_116460141_ccs	1	4673	4745	Ser	GCT	0	0	-23.56
m64111_201213_171552_116460141_ccs	2	5305	5377	Gly	TCC	0	0	-23.75
m64111_201213_171552_116524289_ccs	1	3735	3807	Thr	AGT	0	0	-27.45
m64111_201213_171552_116524289_ccs	2	311	239	Ser	GCT	0	0	-29.34
m64111_201213_171552_116590654_ccs	1	2020	1941	Asn	GTT	0	0	-28.32
m64111_201213_171552_116982615_ccs	1	1433	1503	Ser	TGA	0	0	-29.73
m64111_201213_171552_116982615_ccs	2	6976	6906	Gln	TTG	0	0	-29.06
m64111_201213_171552_117115614_ccs	1	793	717	Leu	TAA	0	0	-30.65
m64111_201213_171552_117181115_ccs	1	6510	6582	Asn	ATT	0	0	-29.94
m64111_201213_171552_79235416_ccs01	1	208	136	Lys	CTT	0	0	-21.89
m64111_201213_171552_79298701_ccs	1	5713	5785	Ser	GCT	0	0	-28.26
m64111_201213_171552_79299375_ccs	1	6317	6245	Lys	CTT	0	0	-26.09
m64111_201213_171552_117833967_ccs	1	6204	6132	Ser	GCT	0	0	-28.26
m64111_201213_171552_46989379_ccs	1	1406	1476	Ser	TGA	0	0	-29.73
m64111_201213_171552_46989379_ccs	2	4507	4578	Gln	TTG	0	0	-27.4
m64111_201213_171552_117901976_ccs	1	379	452	Thr	TGT	0	0	-28.88
m64111_201213_171552_118292843_ccs	1	1628	1700	Gly	GCC	0	0	-23.17
m64111_201213_171552_118358127_ccs	1	7038	6966	Ser	GCT	0	0	-27.77
m64111_201213_171552_118753380_ccs	1	2708	2637	Thr	AGT	0	0	-29.43
m64111_201213_171552_118817493_ccs	1	62	1	Gln	TTG	0	0	-25.55
m64111_201213_171552_118949140_ccs	1	2018	2090	Ser	GCT	0	0	-26.2
m64111_201213_171552_119145399_ccs	1	5657	5585	Tyr	GTA	0	0	-19.03
m64111_201213_171552_119802598_ccs	1	2383	2309	Arg	TCT	0	0	-31.57
m64111_201213_171552_119932715_ccs	1	1087	1159	Ser	GCT	0	0	-28.26
m64111_201213_171552_119932715_ccs	2	3443	3515	Ser	GCT	0	0	-28.26
m64111_201213_171552_119932715_ccs	3	4466	4538	Ser	GCT	0	0	-24.06
m64111_201213_171552_119932715_ccs	4	1534	1462	Ser	GCT	0	0	-28.26
m64111_201213_171552_120260426_ccs	1	3121	3047	Ala	AGC	0	0	-29
m64111_201213_171552_120390262_ccs	1	468	540	Ser	GCT	0	0	-28.26
m64111_201213_171552_120390262_ccs	2	4643	4715	Arg	TCT	0	0	-28.26
m64111_201213_171552_120390262_ccs	3	2506	2434	Gln	CTG	0	0	-30.4
m64111_201213_171552_120653045_ccs	1	4437	4365	Cys	GCA	0	0	-28.73
m64111_201213_171552_120851080_ccs	1	1210	1138	Ser	GCT	0	0	-25.04
m64111_201213_171552_121438926_ccs	1	57	127	Ser	TGA	0	0	-29.73
m64111_201213_171552_121438926_ccs	2	3155	3225	Gln	TTG	0	0	-29.06
m64111_201213_171552_121570513_ccs	1	275	345	Ala	AGC	0	0	-22
m64111_201213_171552_79694245_ccs	1	1277	1205	Asn	GTT	0	0	-25.04
m64111_201213_171552_79759271_ccs	1	5184	5109	Ala	GGC	0	0	-21.92
m64111_201213_171552_46990375_ccs	1	8719	8791	Ser	GCT	0	0	-28.26
m64111_201213_171552_47054908_ccs	1	54	126	Asn	GTT	0	0	-26.65
m64111_201213_171552_47055048_ccs	1	3105	3177	Ser	GCT	0	0	-25.04
m64111_201213_171552_47253476_ccs0	1	1538	1610	Trp	CCA	0	0	-29.72
m64111_201213_171552_47253476_ccs01	1	339	411	Trp	CCA	0	0	-29.72
m64111_201213_171552_47319683_ccs	1	2114	2042	Ser	GCT	0	0	-24.44
m64111_201213_171552_121636924_ccs	1	4999	4929	Ser	TGA	0	0	-29.73
m64111_201213_171552_121636924_ccs	2	1896	1826	Gln	TTG	0	0	-29.06
m64111_201213_171552_121832925_ccs	1	2277	2348	Val	AAC	0	0	-27.44
m64111_201213_171552_122028723_ccs	1	3072	3144	Ser	GCT	0	0	-28.26
m64111_201213_171552_122028723_ccs	2	4733	4661	Lys	CTT	0	0	-22.86
m64111_201213_171552_122095966_ccs	1	689	762	Arg	CCT	0	0	-29.17
m64111_201213_171552_123078472_ccs	1	1135	1207	Pro	AGG	0	0	-27.02
m64111_201213_171552_123208870_ccs	1	4242	4313	***	CTA	0	0	-21.36
m64111_201213_171552_123274107_ccs	1	562	490	Ser	GCT	0	0	-25.04
m64111_201213_171552_123470438_ccs	1	2462	2534	Lys	CTT	0	0	-30.89
m64111_201213_171552_123535868_ccs	1	12646	12576	Ser	TGA	0	0	-29.73
m64111_201213_171552_123535868_ccs	2	9544	9474	Gln	TTG	0	0	-29.06
m64111_201213_171552_123865454_ccs	1	5556	5629	Gly	GCC	0	0	-31.62
m64111_201213_171552_123930000_ccs	1	2184	2256	Ser	GCT	0	0	-31.5
m64111_201213_171552_123931049_ccs	1	10146	10076	Ser	TGA	0	0	-29.73
m64111_201213_171552_123931049_ccs	2	7046	6976	Gln	TTG	0	0	-29.06
m64111_201213_171552_124193200_ccs	1	2605	2532	Gly	TCC	0	0	-22.87
m64111_201213_171552_124520808_ccs	1	2524	2596	Ser	GCT	0	0	-28.26
m64111_201213_171552_124652100_ccs	1	1598	1526	Gln	CTG	0	0	-30.73
m64111_201213_171552_124781887_ccs	1	1391	1316	Gly	GCC	0	0	-29.74
m64111_201213_171552_124913197_ccs0	1	2601	2529	Ser	GCT	0	0	-28.26
m64111_201213_171552_124913197_ccs01	1	5850	5778	Ser	GCT	0	0	-28.26
m64111_201213_171552_124913197_ccs01	2	857	785	Ser	GCT	0	0	-28.26
m64111_201213_171552_125109994_ccs	1	3296	3224	Ser	GCT	0	0	-30.64
m64111_201213_171552_125109994_ccs	2	86	13	Thr	TGT	0	0	-24.92
m64111_201213_171552_125373028_ccs	1	3252	3328	Ser	GGA	0	0	-26.57
m64111_201213_171552_80019542_ccs	1	3221	3149	Asn	ATT	0	0	-30.36
m64111_201213_171552_80216525_ccs	1	6425	6353	Asn	GTT	0	0	-25.87
m64111_201213_171552_47448772_ccs	1	4605	4677	Gly	TCC	0	0	-26.79
m64111_201213_171552_125633308_ccs	1	765	693	Asn	GTT	0	0	-24.47
m64111_201213_171552_125634712_ccs	1	305	377	Ser	GCT	0	0	-28.26
m64111_201213_171552_125700786_ccs01	1	1139	1064	Gly	GCC	0	0	-29.74
m64111_201213_171552_125961211_ccs	1	5482	5554	Asn	GTT	0	0	-28.26
m64111_201213_171552_127600648_ccs	1	2206	2135	Ser	TGA	0	0	-29.87
m64111_201213_171552_127665387_ccs0	1	25	96	Gly	TCC	0	0	-31.13
m64111_201213_171552_127665387_ccs010	1	69	140	Gly	TCC	0	0	-31.13
m64111_201213_171552_127993811_ccs	1	4511	4583	Lys	CTT	0	0	-28.3
m64111_201213_171552_128059579_ccs0	1	394	323	Lys	TTT	0	0	-27.14
m64111_201213_171552_128059579_ccs01	1	97	26	Lys	TTT	0	0	-22.24
m64111_201213_171552_128253970_ccs	1	3507	3579	Gly	GCC	0	0	-29.39
m64111_201213_171552_128256176_ccs	1	2094	2022	Ser	GCT	0	0	-28.26
m64111_201213_171552_128319874_ccs	1	5024	5096	His	GTG	0	0	-28.13
m64111_201213_171552_128452642_ccs	1	4044	3974	Ser	TGA	0	0	-29.73
m64111_201213_171552_128452642_ccs	2	942	872	Gln	TTG	0	0	-29.06
m64111_201213_171552_128647313_ccs	1	3522	3450	His	GTG	0	0	-28.52
m64111_201213_171552_128713879_ccs	1	7666	7738	Ser	GCT	0	0	-22.87
m64111_201213_171552_128844923_ccs	1	2844	2771	Gln	CTG	0	0	-27.34
m64111_201213_171552_128844923_ccs	2	2160	2088	Ala	AGC	0	0	-29.54
m64111_201213_171552_80611058_ccs	1	545	615	Ser	TGA	0	0	-29.73
m64111_201213_171552_80611058_ccs	2	5333	5263	Gln	TTG	0	0	-29.06
m64111_201213_171552_80675893_ccs	1	3530	3602	Ser	GCT	0	0	-28.66
m64111_201213_171552_80675893_ccs	2	4845	4773	Ser	GCT	0	0	-27.22
m64111_201213_171552_47906870_ccs	1	716	644	Lys	CTT	0	0	-29.65
m64111_201213_171552_129173457_ccs	1	5914	5986	Ser	GCT	0	0	-21.3
m64111_201213_171552_129370434_ccs	1	239	315	Gly	GCC	0	0	-30.27
m64111_201213_171552_129827279_ccs	1	4759	4687	Glu	TTC	0	0	-30.23
m64111_201213_171552_130222812_ccs0	1	324	396	Asn	GTT	0	0	-28.61
m64111_201213_171552_130222812_ccs01	1	2147	2219	Asn	GTT	0	0	-23.72
m64111_201213_171552_130550592_ccs	1	868	940	Lys	CTT	0	0	-28.26
m64111_201213_171552_130878064_ccs	1	3092	3164	Ser	GCT	0	0	-28.26
m64111_201213_171552_131008058_ccs	1	5756	5684	Ser	GCT	0	0	-28.54
m64111_201213_171552_131466489_ccs	1	2512	2583	Lys	CTT	0	0	-26.36
m64111_201213_171552_131467732_ccs	1	1793	1865	Asp	GTC	0	0	-28.31
m64111_201213_171552_131531852_ccs01	1	1308	1380	Arg	CCT	0	0	-28.84
m64111_201213_171552_131663109_ccs	1	2667	2595	Ser	GCT	0	0	-31.23
m64111_201213_171552_131860431_ccs	1	5639	5565	Thr	AGT	0	0	-30.32
m64111_201213_171552_131860431_ccs	2	1944	1872	Ser	GCT	0	0	-28.26
m64111_201213_171552_131860431_ccs	3	1407	1335	Asn	GTT	0	0	-28.26
m64111_201213_171552_132055698_ccs	1	348	255	***	TTA	0	0	-31.47
m64111_201213_171552_132120996_ccs	1	2528	2456	His	ATG	0	0	-28.97
m64111_201213_171552_132121127_ccs	1	577	649	Arg	CCT	0	0	-24.87
m64111_201213_171552_132317541_ccs	1	256	183	Asp	GTC	0	0	-27.31
m64111_201213_171552_132448437_ccs	1	2098	2174	Gly	CCC	0	0	-30.35
m64111_201213_171552_132448437_ccs	2	429	357	Ser	GCT	0	0	-30.08
m64111_201213_171552_132579884_ccs	1	887	959	Lys	CTT	0	0	-28.3
m64111_201213_171552_132844108_ccs	1	11082	11154	Ser	GCT	0	0	-26.16
m64111_201213_171552_132908406_ccs	1	1243	1171	Asn	GTT	0	0	-25.04
m64111_201213_171552_132908513_ccs	1	2349	2421	Lys	CTT	0	0	-27.1
m64111_201213_171552_132972908_ccs	1	7076	7003	Val	TAC	0	0	-23.9
m64111_201213_171552_132972908_ccs	2	4287	4215	Gly	TCC	0	0	-25.93
m64111_201213_171552_81133767_ccs	1	7621	7550	Val	AAC	0	0	-28.68
m64111_201213_171552_132974337_ccs	1	3859	3787	Ser	GCT	0	0	-28.26
m64111_201213_171552_48300125_ccs	1	1414	1342	Ala	AGC	0	0	-22.87
m64111_201213_171552_48302286_ccs	1	1651	1723	Ser	GCT	0	0	-23.08
m64111_201213_171552_133170033_ccs0	1	1232	1304	Ser	GCT	0	0	-29.71
m64111_201213_171552_133170033_ccs010	1	715	787	Ser	GCT	0	0	-29.71
m64111_201213_171552_133170033_ccs0101	1	347	419	Ser	GCT	0	0	-29.71
m64111_201213_171552_133628220_ccs	1	1270	1343	Ile	GAT	0	0	-28.52
m64111_201213_171552_133759211_ccs	1	7121	7193	Ile	AAT	0	0	-28.51
m64111_201213_171552_133761843_ccs0	1	695	765	Lys	TTT	0	0	-30.75
m64111_201213_171552_133761843_ccs01	1	416	486	Lys	TTT	0	0	-30.75
m64111_201213_171552_134087434_ccs	1	9628	9700	Ser	GCT	0	0	-25.86
m64111_201213_171552_134087434_ccs	2	6129	6057	Ser	GCT	0	0	-28.26
m64111_201213_171552_134089502_ccs	1	806	735	Cys	ACA	0	0	-20.43
m64111_201213_171552_134218913_ccs	1	2888	2960	Ser	GCT	0	0	-28.26
m64111_201213_171552_134283732_ccs	1	192	264	Lys	CTT	0	0	-21.57
m64111_201213_171552_134283732_ccs	2	5024	4953	Ala	AGC	0	0	-26.5
m64111_201213_171552_8585277_ccs	1	6007	6079	Ser	GCT	0	0	-27.1
m64111_201213_171552_8585277_ccs	2	6808	6881	Lys	CTT	0	0	-28.28
m64111_201213_171552_8849352_ccs	1	2038	1966	Ser	GCT	0	0	-29.3
m64111_201213_171552_8979082_ccs	1	892	964	Ser	GCT	0	0	-30.22
m64111_201213_171552_8979585_ccs	1	2826	2756	Ser	TGA	0	0	-29.73
m64111_201213_171552_9636551_ccs	1	2882	2954	Ser	GCT	0	0	-31.32
m64111_201213_171552_9701716_ccs	1	659	729	Gln	TTG	0	0	-29.06
m64111_201213_171552_9701716_ccs	2	8982	9052	Ser	TGA	0	0	-29.73
m64111_201213_171552_9830969_ccs	1	3291	3363	Ser	GCT	0	0	-28.26
m64111_201213_171552_10224943_ccs	1	1641	1713	Arg	TCT	0	0	-28.26
m64111_201213_171552_81331984_ccs	1	5446	5374	Ser	GCT	0	0	-23.39
m64111_201213_171552_81528216_ccs	1	2270	2342	Ser	GCT	0	0	-25.74
m64111_201213_171552_10422440_ccs	1	1500	1576	Thr	TGT	0	0	-29.92
m64111_201213_171552_48497492_ccs0	1	125	49	Gln	CTG	0	0	-23.37
m64111_201213_171552_48497492_ccs01	1	421	345	Gln	CTG	0	0	-26.88
m64111_201213_171552_48694486_ccs	1	5191	5263	Ser	GCT	0	0	-27.57
m64111_201213_171552_10617839_ccs	1	3480	3552	Asn	GTT	0	0	-22.87
m64111_201213_171552_10683092_ccs	1	14464	14394	Gln	TTG	0	0	-29.06
m64111_201213_171552_10683092_ccs	2	1267	1197	Ser	TGA	0	0	-29.73
m64111_201213_171552_10944651_ccs	1	1043	1114	Trp	CCA	0	0	-31.38
m64111_201213_171552_11405115_ccs0	1	613	685	Ser	GCT	0	0	-29.77
m64111_201213_171552_11534348_ccs	1	3741	3669	Ser	GCT	0	0	-27.57
m64111_201213_171552_11796546_ccs	1	5001	5073	Lys	CTT	0	0	-30.69
m64111_201213_171552_11798235_ccs	1	84	12	Asn	GTT	0	0	-30.02
m64111_201213_171552_12257694_ccs	1	11017	11087	Ser	TGA	0	0	-29.73
m64111_201213_171552_12257694_ccs	2	14117	14187	Gln	TTG	0	0	-29.06
m64111_201213_171552_12386854_ccs	1	4675	4603	Arg	CCT	0	0	-28.99
m64111_201213_171552_12452643_ccs	1	423	351	Asn	GTT	0	0	-27.61
m64111_201213_171552_12454289_ccs	1	6626	6554	Lys	CTT	0	0	-31.19
m64111_201213_171552_12454289_ccs	2	196	123	Cys	ACA	0	0	-26.59
m64111_201213_171552_12585446_ccs	1	10024	9952	Arg	GCG	0	0	-27
m64111_201213_171552_134480614_ccs	1	3770	3842	Thr	TGT	0	0	-30.55
m64111_201213_171552_134480614_ccs	2	5877	5949	Asn	GTT	0	0	-28.26
m64111_201213_171552_134546572_ccs	1	563	635	Ser	GCT	0	0	-25.04
m64111_201213_171552_134809205_ccs	1	5579	5761	Ala	AGC	0	0	-31.45
m64111_201213_171552_134941497_ccs	1	4538	4465	Asn	GTT	0	0	-28.02
m64111_201213_171552_81921973_ccs	1	1063	1133	Ser	GCT	0	0	-29.09
m64111_201213_171552_81987524_ccs	1	8699	8629	Gln	TTG	0	0	-29.06
m64111_201213_171552_48890174_ccs	1	8254	8182	Ser	GCT	0	0	-27.79
m64111_201213_171552_135725450_ccs	1	694	622	Ser	GCT	0	0	-28.26
m64111_201213_171552_135726790_ccs	1	592	665	Lys	CTT	0	0	-31.29
m64111_201213_171552_135922995_ccs	1	139	68	Asn	GTT	0	0	-23.37
m64111_201213_171552_135924271_ccs	1	1869	1941	Asn	GTT	0	0	-27.18
m64111_201213_171552_136118301_ccs	1	2777	2848	Val	CAC	0	0	-31.13
m64111_201213_171552_136252020_ccs	1	2291	2363	Asn	GTT	0	0	-29.42
m64111_201213_171552_136315071_ccs	1	3343	3415	Asn	GTT	0	0	-28.26
m64111_201213_171552_136448423_ccs0	1	45	115	Ser	GCT	0	0	-29.3
m64111_201213_171552_136448423_ccs010	1	349	419	Ser	GCT	0	0	-29.3
m64111_201213_171552_136841082_ccs	1	2383	2311	Gly	GCC	0	0	-25.51
m64111_201213_171552_137102296_ccs	1	1062	990	Ser	GCT	0	0	-29.35
m64111_201213_171552_137103840_ccs	1	3617	3545	Lys	CTT	0	0	-30.27
m64111_201213_171552_137890512_ccs	1	3550	3478	Ser	GCT	0	0	-28.37
m64111_201213_171552_137955527_ccs	1	3032	2960	Ser	GCT	0	0	-28.26
m64111_201213_171552_137956095_ccs	1	516	445	Val	AAC	0	0	-29.46
m64111_201213_171552_138150024_ccs	1	4277	4205	Ser	GCT	0	0	-28.1
m64111_201213_171552_138939177_ccs	1	271	199	Tyr	GTA	0	0	-30.75
m64111_201213_171552_139265408_ccs	1	8170	8098	Ser	GCT	0	0	-28.26
m64111_201213_171552_139395821_ccs0	1	1832	1760	Ser	GCT	0	0	-28.26
m64111_201213_171552_139395821_ccs01	1	1132	1060	Ser	GCT	0	0	-28.26
m64111_201213_171552_82051662_ccs	1	4494	4424	Ser	TGA	0	0	-29.73
m64111_201213_171552_82053890_ccs	1	4305	4377	Ser	GCT	0	0	-28.26
m64111_201213_171552_82314011_ccs	1	1692	1620	Ser	GCT	0	0	-28.92
m64111_201213_171552_75106919_ccs	1	3049	2977	Lys	CTT	0	0	-27.59
m64111_201213_171552_75432209_ccs	1	5924	5996	Ser	GCT	0	0	-22.86
m64111_201213_171552_75432209_ccs	2	6244	6316	Asn	GTT	0	0	-30.57
m64111_201213_171552_75432209_ccs	3	8626	8698	Asn	GTT	0	0	-28.26
m64111_201213_171552_75432209_ccs	4	411	339	Ser	GCT	0	0	-26.65
m64111_201213_171552_75432276_ccs	1	1686	1756	Lys	TTT	0	0	-31.35
m64111_201213_171552_49217795_ccs	1	533	603	Gln	TTG	0	0	-29.06
m64111_201213_171552_49217795_ccs	2	6351	6281	Ser	TGA	0	0	-29.73
m64111_201213_171552_49218725_ccs	1	4218	4146	Ser	GCT	0	0	-29.66
m64111_201213_171552_49220350_ccs	1	2505	2577	Ser	GCT	0	0	-25.34
m64111_201213_171552_49220350_ccs	2	510	439	Ser	ACT	0	0	-28.8
m64111_201213_171552_264726_ccs	1	641	713	***	CTA	0	0	-25.07
m64111_201213_171552_395558_ccs	1	5479	5407	Ser	GCT	0	0	-30.16
m64111_201213_171552_395592_ccs	1	3411	3482	Gly	TCC	0	0	-28.31
m64111_201213_171552_139659420_ccs	1	2191	2263	Ser	GCT	0	0	-28.26
m64111_201213_171552_139659420_ccs	2	4797	4869	Ser	GCT	0	0	-30.08
m64111_201213_171552_139659420_ccs	3	8084	8156	Val	TAC	0	0	-30.18
m64111_201213_171552_139724572_ccs	1	65	140	Ala	AGC	0	0	-29.32
m64111_201213_171552_139855538_ccs	1	2163	2235	***	CTA	0	0	-28.26
m64111_201213_171552_139855538_ccs	2	2734	2662	Ser	GCT	0	0	-28.56
m64111_201213_171552_139985180_ccs	1	2550	2478	Ser	GCT	0	0	-28.26
m64111_201213_171552_139985180_ccs	2	2342	2270	Asn	GTT	0	0	-26.65
m64111_201213_171552_139985736_ccs	1	9553	9481	Thr	GGT	0	0	-25.04
m64111_201213_171552_140118698_ccs	1	6063	5991	Ser	GCT	0	0	-28.26
m64111_201213_171552_140118698_ccs	2	2575	2503	Asn	GTT	0	0	-31.53
m64111_201213_171552_140968363_ccs	1	4365	4265	His	GTG	0	0	-30.88
m64111_201213_171552_141036055_ccs	1	4524	4450	Lys	CTT	0	0	-30.91
m64111_201213_171552_141361838_ccs	1	982	1054	Ser	GCT	0	0	-24.64
m64111_201213_171552_141952420_ccs	1	1226	1298	Ile	GAT	0	0	-22.12
m64111_201213_171552_142017922_ccs	1	1583	1652	Thr	TGT	0	0	-27.86
m64111_201213_171552_142344350_ccs0	1	3513	3585	Lys	CTT	0	0	-30.04
m64111_201213_171552_143065134_ccs	1	2523	2595	Ser	GCT	0	0	-23.91
m64111_201213_171552_3080504_ccs	1	5363	5291	Lys	CTT	0	0	-23.86
m64111_201213_171552_143327568_ccs	1	6348	6278	Ser	TGA	0	0	-29.73
m64111_201213_171552_143327568_ccs	2	3250	3180	Gln	TTG	0	0	-29.06
m64111_201213_171552_49414401_ccs	1	3770	3698	Lys	CTT	0	0	-29.65
m64111_201213_171552_49414717_ccs	1	134	62	Ser	GCT	0	0	-25.04
m64111_201213_171552_143590182_ccs	1	2483	2555	Thr	GGT	0	0	-25.58
m64111_201213_171552_143657593_ccs	1	2119	2190	Asn	ATT	0	0	-27.54
m64111_201213_171552_143787666_ccs	1	201	130	Ala	AGC	0	0	-25.67
m64111_201213_171552_143852940_ccs	1	4702	4630	Ser	GCT	0	0	-31.15
m64111_201213_171552_143918112_ccs	1	6914	6986	Ser	GCT	0	0	-28.26
m64111_201213_171552_144049332_ccs	1	1386	1458	Ser	ACT	0	0	-22.86
m64111_201213_171552_144116408_ccs	1	767	840	Phe	GAA	0	0	-30.72
m64111_201213_171552_144180714_ccs00	1	618	690	Asn	GTT	0	0	-27.59
m64111_201213_171552_144180714_ccs01	1	1144	1216	Asn	GTT	0	0	-22.7
m64111_201213_171552_144247454_ccs	1	14253	14325	Ser	GCT	0	0	-22.83
m64111_201213_171552_144377915_ccs	1	9521	9451	Ser	TGA	0	0	-30.03
m64111_201213_171552_144377915_ccs	2	6422	6352	Gln	TTG	0	0	-29.06
m64111_201213_171552_144572514_ccs	1	3821	3897	Gln	CTG	0	0	-28.72
m64111_201213_171552_144837111_ccs	1	4070	4142	Ser	GCT	0	0	-31.14
m64111_201213_171552_144902786_ccs	1	10383	10312	Leu	CAG	0	0	-19.79
m64111_201213_171552_145229225_ccs	1	362	433	Gly	TCC	0	0	-24.15
m64111_201213_171552_145360288_ccs	1	3470	3398	Ser	GCT	0	0	-26.65
m64111_201213_171552_145425884_ccs	1	1349	1453	Asp	ATC	0	0	-27.35
m64111_201213_171552_145558057_ccs	1	3322	3394	Ser	GCT	0	0	-26.34
m64111_201213_171552_145754618_ccs	1	112	182	Gln	TTG	0	0	-29.06
m64111_201213_171552_145754618_ccs	2	13309	13379	Ser	TGA	0	0	-29.73
m64111_201213_171552_145754802_ccs	1	9713	9784	Arg	TCT	0	0	-21.37
m64111_201213_171552_145950159_ccs	1	3268	3340	Ile	GAT	0	0	-30.48
m64111_201213_171552_146211963_ccs	1	142	72	Gly	TCC	0	0	-27.42
m64111_201213_171552_146213014_ccs	1	106	177	Val	AAC	0	0	-29.25
m64111_201213_171552_146539435_ccs	1	4636	4708	Ala	GGC	0	0	-31.17
m64111_201213_171552_146736251_ccs	1	1417	1487	Leu	GAG	0	0	-24.45
m64111_201213_171552_146736251_ccs	2	5618	5690	Ser	GCT	0	0	-28.26
m64111_201213_171552_146736251_ccs	3	3108	3036	Ser	GCT	0	0	-28.26
m64111_201213_171552_146800640_ccs	1	1682	1752	Ser	TGA	0	0	-29.73
m64111_201213_171552_82447104_ccs	1	2390	2319	Ala	AGC	0	0	-30.05
m64111_201213_171552_82576296_ccs0	1	214	142	Trp	CCA	0	0	-31.61
m64111_201213_171552_82773484_ccs	1	961	1035	Lys	CTT	0	0	-31.03
m64111_201213_171552_146803288_ccs	1	11970	11898	Ser	GCT	0	0	-23.08
m64111_201213_171552_49744540_ccs	1	1600	1672	Ser	GCT	0	0	-28.26
m64111_201213_171552_50005125_ccs	1	2617	2689	Asn	GTT	0	0	-28.26
m64111_201213_171552_50070839_ccs	1	537	608	Asp	GTC	0	0	-30.44
m64111_201213_171552_50070839_ccs	2	6706	6634	Ser	GCT	0	0	-23.78
m64111_201213_171552_147129805_ccs	1	3027	3098	Ser	GCT	0	0	-23.04
m64111_201213_171552_147195978_ccs	1	9916	9988	Ala	GGC	0	0	-28.49
m64111_201213_171552_147916748_ccs	1	3559	3630	Thr	TGT	0	0	-24.46
m64111_201213_171552_147916748_ccs	2	9632	9703	Ala	TGC	0	0	-12.96
m64111_201213_171552_147981559_ccs	1	3079	3006	Asn	GTT	0	0	-30.31
m64111_201213_171552_148177832_ccs	1	3313	3241	Ser	GCT	0	0	-26.14
m64111_201213_171552_148506566_ccs	1	10199	10128	Lys	CTT	0	0	-27.64
m64111_201213_171552_148570653_ccs	1	548	618	Gln	TTG	0	0	-29.06
m64111_201213_171552_148570957_ccs	1	3458	3530	Ser	GCT	0	0	-28.26
m64111_201213_171552_148767359_ccs	1	94	22	Gly	GCC	0	0	-29.76
m64111_201213_171552_148767869_ccs0	1	622	694	Ser	ACT	0	0	-28.3
m64111_201213_171552_148767869_ccs01	1	285	357	Ser	ACT	0	0	-28.3
m64111_201213_171552_148768924_ccs	1	5194	5266	Ser	GCT	0	0	-30.4
m64111_201213_171552_149228297_ccs	1	2952	2880	Ser	GCT	0	0	-25.04
m64111_201213_171552_149423786_ccs	1	7115	7043	Ser	GCT	0	0	-28.26
m64111_201213_171552_149423786_ccs	2	955	883	Asn	GTT	0	0	-24.3
m64111_201213_171552_149750245_ccs	1	1185	1257	Ile	GAT	0	0	-26.09
m64111_201213_171552_149750348_ccs	1	239	168	Ala	AGC	0	0	-21.81
m64111_201213_171552_149750778_ccs	1	3948	3876	Ser	GCT	0	0	-31.16
m64111_201213_171552_150210568_ccs	1	8593	8521	***	CTA	0	0	-31.47
m64111_201213_171552_150470959_ccs	1	1966	2038	Lys	CTT	0	0	-27.69
m64111_201213_171552_150470959_ccs	2	10140	10067	Gly	GCC	0	0	-31.48
m64111_201213_171552_150537326_ccs	1	969	1041	Asn	GTT	0	0	-28.26
m64111_201213_171552_150537326_ccs	2	2197	2269	Asn	GTT	0	0	-25.04
m64111_201213_171552_150604315_ccs	1	10822	10894	Ser	GCT	0	0	-30.11
m64111_201213_171552_50136183_ccs	1	663	592	Ser	AGA	0	0	-29.02
m64111_201213_171552_50136636_ccs	1	1807	1879	Thr	AGT	0	0	-30.15
m64111_201213_171552_50266629_ccs	1	6354	6426	***	TCA	0	0	-31.59
m64111_201213_171552_50332363_ccs	1	70	142	Ser	GCT	0	0	-29.3
m64111_201213_171552_50398700_ccs	1	4439	4511	Ser	GCT	0	0	-29
m64111_201213_171552_50398700_ccs	2	4832	4904	Asn	GTT	0	0	-26.65
m64111_201213_171552_50398700_ccs	3	7794	7722	Ala	AGC	0	0	-24.42
m64111_201213_171552_150997248_ccs	1	3061	3133	Asp	GTC	0	0	-29.67
m64111_201213_171552_151126348_ccs	1	1928	2000	Ser	ACT	0	0	-23.03
m64111_201213_171552_151454577_ccs	1	880	809	Ala	AGC	0	0	-31.6
m64111_201213_171552_151520448_ccs	1	182	257	Ser	GCT	0	0	-23.37
m64111_201213_171552_151652041_ccs	1	10124	10052	Ser	GCT	0	0	-28.26
m64111_201213_171552_152111701_ccs	1	5090	5172	Ala	TGC	0	0	-30.05
m64111_201213_171552_152437337_ccs	1	2519	2591	Ser	GCT	0	0	-31.58
m64111_201213_171552_152503974_ccs	1	2422	2495	Lys	CTT	0	0	-29.01
m64111_201213_171552_152570534_ccs	1	4697	4616	His	GTG	0	0	-31.23
m64111_201213_171552_152830357_ccs	1	715	787	Ser	ACT	0	0	-17.55
m64111_201213_171552_153094389_ccs	1	9402	9328	Ser	GCT	0	0	-28.25
m64111_201213_171552_153158677_ccs	1	2323	2395	Ser	GCT	0	0	-25.29
m64111_201213_171552_153354440_ccs0	1	415	486	Ala	TGC	0	0	-22.77
m64111_201213_171552_153356137_ccs0	1	1487	1558	Ala	TGC	0	0	-26.34
m64111_201213_171552_153356708_ccs	1	1681	1609	Ser	GCT	0	0	-30.04
m64111_201213_171552_153420130_ccs	1	3517	3589	Ser	GCT	0	0	-21.56
m64111_201213_171552_153420937_ccs	1	4731	4803	Asn	GTT	0	0	-26.65
m64111_201213_171552_153748646_ccs	1	2983	3055	Ser	GCT	0	0	-25.04
m64111_201213_171552_153748646_ccs	2	7658	7586	Ser	GCT	0	0	-29.78
m64111_201213_171552_153748646_ccs	3	1930	1858	Gly	TCC	0	0	-31.68
m64111_201213_171552_154011323_ccs	1	1733	1653	Lys	CTT	0	0	-31.17
m64111_201213_171552_154011431_ccs	1	2042	1970	Ser	GCT	0	0	-30.11
m64111_201213_171552_154141092_ccs	1	4734	4662	Ser	GCT	0	0	-26.08
m64111_201213_171552_154338980_ccs	1	5551	5623	Ser	GCT	0	0	-26.65
m64111_201213_171552_154600510_ccs	1	113	39	Ala	TGC	0	0	-21.9
m64111_201213_171552_83298628_ccs00	1	258	186	Asn	GTT	0	0	-28.67
m64111_201213_171552_83427574_ccs	1	3286	3358	Lys	CTT	0	0	-26.05
m64111_201213_171552_83427574_ccs	2	7088	7016	Ala	AGC	0	0	-30.6
m64111_201213_171552_83427574_ccs	3	1563	1491	Ser	GCT	0	0	-31.73
m64111_201213_171552_83492972_ccs0	1	222	150	Ser	GCT	0	0	-28.26
m64111_201213_171552_83492972_ccs01	1	327	255	Ser	GCT	0	0	-28.26
m64111_201213_171552_83493771_ccs	1	7325	7397	Ser	GCT	0	0	-31.04
m64111_201213_171552_154798422_ccs	1	548	620	Ser	GCT	0	0	-26.82
m64111_201213_171552_154798422_ccs	2	1499	1571	Ile	GAT	0	0	-29.66
m64111_201213_171552_154798422_ccs	3	2690	2761	Val	TAC	0	0	-24.3
m64111_201213_171552_154993223_ccs	1	7817	7745	Ser	GCT	0	0	-22.84
m64111_201213_171552_155058774_ccs	1	3600	3528	Ser	GCT	0	0	-28.26
m64111_201213_171552_155255833_ccs0	1	416	488	Lys	CTT	0	0	-27.15
m64111_201213_171552_155255833_ccs010	1	497	569	Lys	CTT	0	0	-27.15
m64111_201213_171552_155255833_ccs0101	1	187	259	Lys	CTT	0	0	-27.15
m64111_201213_171552_155648494_ccs	1	174	244	Gln	TTG	0	0	-29.06
m64111_201213_171552_155650601_ccs	1	1682	1610	Ser	GCT	0	0	-23
m64111_201213_171552_155650601_ccs	2	119	47	Ser	GCT	0	0	-23.37
m64111_201213_171552_155978322_ccs	1	2104	2034	Ser	TGA	0	0	-29.73
m64111_201213_171552_156239306_ccs	1	594	664	Gln	TTG	0	0	-29.06
m64111_201213_171552_156567170_ccs01	1	406	335	Ala	AGC	0	0	-28.07
m64111_201213_171552_156567685_ccs	1	1511	1439	Lys	CTT	0	0	-31.77
m64111_201213_171552_156631085_ccs0	1	302	230	Ala	AGC	0	0	-27.37
m64111_201213_171552_156631085_ccs010	1	588	516	Ala	AGC	0	0	-27.37
m64111_201213_171552_157352612_ccs	1	1001	1072	***	CTA	0	0	-31.34
m64111_201213_171552_157615820_ccs	1	7003	6931	Ser	GCT	0	0	-31.78
m64111_201213_171552_157878660_ccs	1	1923	1851	Ser	GCT	0	0	-25.62
m64111_201213_171552_158074199_ccs	1	1645	1717	Ser	GCT	0	0	-28.26
m64111_201213_171552_158074199_ccs	2	5629	5701	Ser	GCT	0	0	-26.88
m64111_201213_171552_158074199_ccs	3	6418	6490	Ser	CGA	0	0	-27.58
m64111_201213_171552_158597580_ccs	1	3856	3925	Ala	GGC	0	0	-26.86
m64111_201213_171552_158598750_ccs	1	2362	2433	Cys	GCA	0	0	-28.86
m64111_201213_171552_158927637_ccs	1	3265	3337	Ser	GCT	0	0	-27.57
m64111_201213_171552_158991997_ccs0	1	13	89	Ser	GGA	0	0	-27.69
m64111_201213_171552_159516685_ccs	1	2389	2317	Asn	GTT	0	0	-28.61
m64111_201213_171552_159648222_ccs	1	2456	2529	His	GTG	0	0	-31.72
m64111_201213_171552_159648222_ccs	2	3074	3146	Ser	GCT	0	0	-30.48
m64111_201213_171552_159910102_ccs	1	6603	6675	Ser	GCT	0	0	-30.22
m64111_201213_171552_159910102_ccs	2	110	38	Ser	TGA	0	0	-28.1
m64111_201213_171552_160172084_ccs	1	1141	1070	Val	AAC	0	0	-25.34
m64111_201213_171552_160827283_ccs0	1	310	237	Gly	GCC	0	0	-24.76
m64111_201213_171552_161350028_ccs	1	14878	14808	Ser	TGA	0	0	-29.73
m64111_201213_171552_161350028_ccs	2	11779	11709	Gln	TTG	0	0	-29.06
m64111_201213_171552_161351919_ccs	1	10572	10502	Gln	TTG	0	0	-29.06
m64111_201213_171552_161480886_ccs	1	10641	10569	Ser	GCT	0	0	-24.52
m64111_201213_171552_161874610_ccs	1	9327	9255	Ser	GCT	0	0	-25.04
m64111_201213_171552_161939946_ccs	1	1733	1661	Lys	CTT	0	0	-26.78
m64111_201213_171552_51446990_ccs0	1	2446	2374	Ser	GCT	0	0	-30.85
m64111_201213_171552_51446990_ccs01	1	1155	1083	Ser	GCT	0	0	-30.85
m64111_201213_171552_51576949_ccs	1	266	338	Ser	GCT	0	0	-30.43
m64111_201213_171552_51578588_ccs	1	4506	4578	Ser	GCT	0	0	-23.42
m64111_201213_171552_162660922_ccs	1	3953	3876	Ser	TGA	0	0	-27.45
m64111_201213_171552_163119958_ccs	1	4002	4074	Arg	TCT	0	0	-25.04
m64111_201213_171552_163186277_ccs	1	144	216	Ser	GCT	0	0	-28.48
m64111_201213_171552_163251547_ccs	1	201	129	Lys	CTT	0	0	-31.47
m64111_201213_171552_163381752_ccs	1	8439	8513	Ala	AGC	0	0	-28.51
m64111_201213_171552_163381752_ccs	2	12698	12626	Gly	TCC	0	0	-26.97
m64111_201213_171552_163383465_ccs	1	2962	3034	Ser	GCT	0	0	-28.24
m64111_201213_171552_163447703_ccs	1	1183	1111	Lys	CTT	0	0	-30.03
m64111_201213_171552_163644296_ccs	1	4966	5038	Ser	AGA	0	0	-31.47
m64111_201213_171552_163907812_ccs	1	5585	5513	Ser	GCT	0	0	-28.26
m64111_201213_171552_163972503_ccs	1	4918	4988	Ser	GGA	0	0	-28.82
m64111_201213_171552_164365518_ccs	1	339	411	Ser	GCT	0	0	-30.41
m64111_201213_171552_164365786_ccs	1	6709	6637	Ser	GCT	0	0	-25.04
m64111_201213_171552_164432246_ccs	1	1162	1234	Ser	GCT	0	0	-28.26
m64111_201213_171552_164496907_ccs	1	179	107	Ser	GCT	0	0	-25.94
m64111_201213_171552_164627685_ccs	1	1907	1835	Ser	GCT	0	0	-22.87
m64111_201213_171552_165087402_ccs	1	2986	2914	Ser	GCT	0	0	-28.26
m64111_201213_171552_165151421_ccs	1	2504	2576	Ala	AGC	0	0	-23.02
m64111_201213_171552_165218923_ccs	1	10725	10655	Gln	TTG	0	0	-29.06
m64111_201213_171552_165480947_ccs	1	1749	1821	Ser	GCT	0	0	-28.26
m64111_201213_171552_165546756_ccs	1	624	552	Gly	GCC	0	0	-29.22
m64111_201213_171552_165873009_ccs	1	1044	1115	Ala	GGC	0	0	-26.81
m64111_201213_171552_84410884_ccs	1	464	392	Thr	TGT	0	0	-28.26
m64111_201213_171552_84478156_ccs	1	3956	4028	Ser	GCT	0	0	-25.04
m64111_201213_171552_84542861_ccs	1	7684	7754	Ser	TGA	0	0	-29.73
m64111_201213_171552_84542861_ccs	2	10675	10605	Gln	TTG	0	0	-29.06
m64111_201213_171552_84608185_ccs	1	5279	5209	Ser	TGA	0	0	-29.73
m64111_201213_171552_166070275_ccs	1	2520	2449	Lys	CTT	0	0	-26.08
m64111_201213_171552_51839734_ccs	1	3906	3978	Ser	GCT	0	0	-31.71
m64111_201213_171552_51840556_ccs	1	1750	1674	Ala	AGC	0	0	-25.61
m64111_201213_171552_51906809_ccs	1	2406	2477	Arg	CCT	0	0	-29.74
m64111_201213_171552_51971544_ccs	1	784	711	Ser	GCT	0	0	-31.52
m64111_201213_171552_166396514_ccs	1	3465	3393	Ser	GCT	0	0	-25.04
m64111_201213_171552_166462984_ccs	1	972	901	Asp	GTC	0	0	-29.56
m64111_201213_171552_166659492_ccs	1	594	522	Lys	CTT	0	0	-23.05
m64111_201213_171552_166855100_ccs	1	943	870	Gly	CCC	0	0	-25.37
m64111_201213_171552_167248536_ccs	1	876	946	Gly	GCC	0	0	-31.7
m64111_201213_171552_167250133_ccs	1	4130	4060	Val	AAC	0	0	-31.27
m64111_201213_171552_167642742_ccs	1	3022	3094	Ser	GCT	0	0	-28.48
m64111_201213_171552_167774289_ccs	1	1397	1469	Ser	GCT	0	0	-28.26
m64111_201213_171552_168428182_ccs	1	8162	8234	Asn	GTT	0	0	-28.26
m64111_201213_171552_168428182_ccs	2	9363	9435	Asn	GTT	0	0	-28.26
m64111_201213_171552_168428752_ccs	1	1401	1472	Ile	AAT	0	0	-29.54
m64111_201213_171552_168495024_ccs000	1	431	503	Ser	GCT	0	0	-23.37
m64111_201213_171552_168495024_ccs010	1	81	153	Ser	GCT	0	0	-28.26
m64111_201213_171552_168495024_ccs010101	1	306	378	Ser	GCT	0	0	-28.26
m64111_201213_171552_168624195_ccs	1	9948	9876	Ser	GCT	0	0	-28.26
m64111_201213_171552_168625362_ccs00	1	1201	1288	Leu	CAA	0	0	-31.7
m64111_201213_171552_168757609_ccs	1	2363	2434	Gly	TCC	0	0	-29.49
m64111_201213_171552_168822417_ccs	1	1989	2061	Asn	GTT	0	0	-30.48
m64111_201213_171552_168953026_ccs	1	2931	3003	Ser	GCT	0	0	-28.67
m64111_201213_171552_169280349_ccs	1	582	510	Ser	ACT	0	0	-28.26
m64111_201213_171552_169413174_ccs	1	2911	2983	Asn	ATT	0	0	-29.71
m64111_201213_171552_169609065_ccs	1	2894	2966	Ser	GCT	0	0	-28.26
m64111_201213_171552_169609712_ccs	1	1576	1504	Ser	GCT	0	0	-26.65
m64111_201213_171552_169672739_ccs	1	1195	1095	Glu	TTC	0	0	-30.76
m64111_201213_171552_169739106_ccs	1	3374	3299	Gly	GCC	0	0	-29.74
m64111_201213_171552_170001281_ccs	1	6745	6673	Glu	TTC	0	0	-28.73
m64111_201213_171552_170066095_ccs	1	3748	3678	Ser	TGA	0	0	-29.73
m64111_201213_171552_170132851_ccs	1	557	486	Ala	AGC	0	0	-26.37
m64111_201213_171552_84739793_ccs	1	5055	5127	***	TTA	0	0	-29.23
m64111_201213_171552_84739793_ccs	2	6306	6234	***	TTA	0	0	-30.48
m64111_201213_171552_84803637_ccs	1	1140	1210	Ser	TGA	0	0	-29.73
m64111_201213_171552_84803637_ccs	2	4239	4309	Gln	TTG	0	0	-29.06
m64111_201213_171552_84804890_ccs0	1	244	172	Ser	GCT	0	0	-27.11
m64111_201213_171552_84804890_ccs01	1	730	658	Ser	GCT	0	0	-27.11
m64111_201213_171552_84806157_ccs	1	2927	2999	Asn	ATT	0	0	-26.63
m64111_201213_171552_85066242_ccs	1	3891	3820	Lys	CTT	0	0	-27.08
m64111_201213_171552_85066398_ccs	1	5323	5396	Pro	AGG	0	0	-30.91
m64111_201213_171552_85068321_ccs	1	8271	8199	Ser	GCT	0	0	-28.49
m64111_201213_171552_85068321_ccs	2	2334	2263	Trp	CCA	0	0	-29.06
m64111_201213_171552_170393987_ccs	1	5007	5078	Ala	TGC	0	0	-31.65
m64111_201213_171552_170393987_ccs	2	6601	6529	Gly	GCC	0	0	-27.83
m64111_201213_171552_52037005_ccs	1	123	194	Cys	GCA	0	0	-17.03
m64111_201213_171552_52037005_ccs	2	4246	4317	Cys	GCA	0	0	-22.45
m64111_201213_171552_52037005_ccs	3	5313	5384	Ala	GGC	0	0	-23.87
m64111_201213_171552_52364324_ccs	1	14627	14557	Ser	TGA	0	0	-29.73
m64111_201213_171552_52364324_ccs	2	11528	11458	Gln	TTG	0	0	-29.06
m64111_201213_171552_52364794_ccs	1	2618	2546	Ala	TGC	0	0	-31.28
m64111_201213_171552_52429920_ccs	1	2518	2446	Arg	TCT	0	0	-30.78
m64111_201213_171552_170461014_ccs	1	3916	3844	Ile	AAT	0	0	-20.71
m64111_201213_171552_170658294_ccs	1	2925	2995	Ser	TGA	0	0	-29.73
m64111_201213_171552_170658294_ccs	2	6023	6093	Gln	TTG	0	0	-29.06
m64111_201213_171552_170722330_ccs0	1	1311	1380	Asp	GTC	0	0	-22.21
m64111_201213_171552_170722330_ccs0101	1	952	1024	Asp	GTC	0	0	-27.1
m64111_201213_171552_170984576_ccs	1	1526	1596	Thr	AGT	0	0	-24.75
m64111_201213_171552_171050246_ccs	1	529	599	Ala	AGC	0	0	-28.72
m64111_201213_171552_171114885_ccs	1	1488	1558	Ala	GGC	0	0	-30.43
m64111_201213_171552_171115160_ccs	1	329	401	Asn	GTT	0	0	-29.96
m64111_201213_171552_171378911_ccs0	1	471	542	Ser	GGA	0	0	-29.72
m64111_201213_171552_171573763_ccs	1	3119	3190	Val	AAC	0	0	-25.52
m64111_201213_171552_171639883_ccs0	1	473	401	Ser	GCT	0	0	-31.04
m64111_201213_171552_171639883_ccs01	1	229	157	Ser	GCT	0	0	-31.04
m64111_201213_171552_171640137_ccs	1	4992	5064	Ser	GCT	0	0	-28.26
m64111_201213_171552_171705332_ccs	1	2715	2786	Thr	AGT	0	0	-27.64
m64111_201213_171552_171706314_ccs	1	4403	4331	Ser	GCT	0	0	-28.26
m64111_201213_171552_171902043_ccs	1	3668	3594	Trp	AAA	0	0	-25.4
m64111_201213_171552_172033392_ccs	1	2835	2907	Ile	AAT	0	0	-30.9
m64111_201213_171552_172033392_ccs	2	5876	5953	Leu	CAA	0	0	-28.45
m64111_201213_171552_172556765_ccs	1	296	368	Cys	ACA	0	0	-25.38
m64111_201213_171552_172557222_ccs	1	8629	8559	Gln	TTG	0	0	-29.06
m64111_201213_171552_172687927_ccs	1	3736	3664	Ser	GCT	0	0	-28.26
m64111_201213_171552_173148184_ccs	1	6159	6087	Ser	GCT	0	0	-27.77
m64111_201213_171552_173408296_ccs	1	3352	3282	Ser	TGA	0	0	-29.73
m64111_201213_171552_173541642_ccs	1	1310	1380	Gln	TTG	0	0	-29.06
m64111_201213_171552_173934226_ccs	1	2579	2491	Ser	AGA	0	0	-30.64
m64111_201213_171552_173934226_ccs	2	2475	2358	Ser	AGA	0	0	-28.43
m64111_201213_171552_85524797_ccs	1	4368	4295	Ser	GCT	0	0	-28.26
m64111_201213_171552_85590957_ccs	1	6307	6377	Ala	TGC	0	0	-26.08
m64111_201213_171552_174000972_ccs	1	2461	2389	Ser	GCT	0	0	-28.56
m64111_201213_171552_174261691_ccs	1	15	85	Thr	TGT	0	0	-29.86
m64111_201213_171552_174262627_ccs	1	1012	940	Asn	GTT	0	0	-26.65
m64111_201213_171552_174393526_ccs	1	1441	1514	Arg	CCT	0	0	-25.04
m64111_201213_171552_175112538_ccs	1	1612	1684	Asn	GTT	0	0	-28.26
m64111_201213_171552_175179502_ccs	1	6319	6247	Ser	GCT	0	0	-31.31
m64111_201213_171552_175243758_ccs	1	2331	2403	Lys	CTT	0	0	-25.04
m64111_201213_171552_175572837_ccs0	1	1873	1944	Ala	GGC	0	0	-26.17
m64111_201213_171552_176292294_ccs	1	2400	2471	Ala	TGC	0	0	-28.27
m64111_201213_171552_176293648_ccs	1	5467	5395	Ser	GCT	0	0	-28.56
m64111_201213_171552_176294073_ccs	1	3302	3230	Ser	GCT	0	0	-24.48
m64111_201213_171552_176357698_ccs0	1	718	790	Ser	GCT	0	0	-27.06
m64111_201213_171552_176357698_ccs01	1	1228	1300	Ser	GCT	0	0	-27.06
m64111_201213_171552_176358597_ccs	1	6563	6635	Ser	GCT	0	0	-30.05
m64111_201213_171552_176489407_ccs	1	3101	3173	Lys	CTT	0	0	-30.27
m64111_201213_171552_176555483_ccs	1	895	965	Gln	TTG	0	0	-29.06
m64111_201213_171552_176555483_ccs	2	4966	4896	Ser	TGA	0	0	-29.73
m64111_201213_171552_176883493_ccs	1	5800	5872	Ser	GCT	0	0	-28.26
m64111_201213_171552_177537084_ccs	1	4192	4120	Trp	AAA	0	0	-31.63
m64111_201213_171552_85787613_ccs	1	11343	11272	Ser	TGA	0	0	-29.73
m64111_201213_171552_85787613_ccs	2	8239	8169	Gln	TTG	0	0	-29.06
m64111_201213_171552_85787824_ccs	1	483	555	Asn	GTT	0	0	-27.59
m64111_201213_171552_592684_ccs	1	2658	2730	Asn	GTT	0	0	-28.26
m64111_201213_171552_657427_ccs	1	1744	1673	Ile	AAT	0	0	-28.69
m64111_201213_171552_177539741_ccs	1	2753	2682	Ala	AGC	0	0	-30.44
m64111_201213_171552_177800430_ccs00	1	129	57	Gly	GCC	0	0	-23.53
m64111_201213_171552_178194199_ccs	1	5327	5255	Ser	GCT	0	0	-28.29
m64111_201213_171552_178194444_ccs	1	2278	2350	Ser	GCT	0	0	-29.18
m64111_201213_171552_178194444_ccs	2	4022	4093	Asp	GTC	0	0	-28.78
m64111_201213_171552_178980645_ccs0	1	842	770	Ser	GCT	0	0	-21.67
m64111_201213_171552_179045886_ccs0	1	1525	1596	Ala	AGC	0	0	-19.76
m64111_201213_171552_179045886_ccs01	1	916	987	Ala	AGC	0	0	-19.76
m64111_201213_171552_179439515_ccs	1	6251	6322	Pro	AGG	0	0	-26.08
m64111_201213_171552_180158914_ccs	1	563	635	Lys	CTT	0	0	-27.57
m64111_201213_171552_180357430_ccs	1	4403	4473	Gln	TTG	0	0	-29.06
m64111_201213_171552_180423362_ccs	1	4387	4315	Ser	GCT	0	0	-28.26
m64111_201213_171552_180423362_ccs	2	2473	2403	Ala	TGC	0	0	-25.39
m64111_201213_171552_180423362_ccs	3	2114	2042	Ser	GCT	0	0	-28.95
m64111_201213_171552_180423362_ccs	4	1913	1841	Asn	GTT	0	0	-26.79
m64111_201213_171552_53477389_ccs	1	906	834	Ser	GCT	0	0	-28.26
m64111_201213_171552_13239808_ccs	1	783	710	Thr	AGT	0	0	-23.89
m64111_201213_171552_13305230_ccs	1	4250	4323	Arg	CCT	0	0	-28.43
m64111_201213_171552_13369533_ccs	1	4687	4757	Ser	TGA	0	0	-29.73
m64111_201213_171552_13437475_ccs	1	2802	2874	Ser	ACT	0	0	-26.53
m64111_201213_171552_13762800_ccs	1	3585	3658	Lys	CTT	0	0	-27.23
m64111_201213_171552_14091621_ccs01	1	2448	2376	Thr	AGT	0	0	-31.5
m64111_201213_171552_14221495_ccs	1	18789	18717	Ser	GCT	0	0	-28.26
m64111_201213_171552_14221495_ccs	2	18344	18273	Lys	CTT	0	0	-28.3
m64111_201213_171552_14221495_ccs	3	16568	16497	Val	AAC	0	0	-21.92
m64111_201213_171552_14222639_ccs	1	2430	2501	Ser	GCT	0	0	-24.83
m64111_201213_171552_14353058_ccs	1	2087	2015	Ser	GCT	0	0	-26.65
m64111_201213_171552_14942816_ccs	1	1934	2004	Ala	AGC	0	0	-28.57
m64111_201213_171552_15206921_ccs	1	4010	3938	Arg	CCT	0	0	-28.26
m64111_201213_171552_15271110_ccs	1	143	215	Trp	CCA	0	0	-31.54
m64111_201213_171552_15598670_ccs	1	143	215	Ser	GCT	0	0	-28.22
m64111_201213_171552_15664342_ccs0	1	127	55	Ser	GCT	0	0	-20.68
m64111_201213_171552_16253552_ccs	1	5588	5660	Asn	GTT	0	0	-27.57
m64111_201213_171552_16253552_ccs	2	7345	7418	Ser	GCT	0	0	-28.26
m64111_201213_171552_16253625_ccs	1	4615	4543	Ser	GCT	0	0	-28.26
m64111_201213_171552_16254177_ccs	1	4643	4715	Thr	GGT	0	0	-25.52
m64111_201213_171552_86378920_ccs	1	3814	3886	Glu	TTC	0	0	-25.71
m64111_201213_171552_16515789_ccs	1	1732	1803	***	TTA	0	0	-24.93
m64111_201213_171552_53545355_ccs00	1	647	720	Ser	GCT	0	0	-28.8
m64111_201213_171552_16713852_ccs	1	5150	5078	Gly	TCC	0	0	-28.36
m64111_201213_171552_16974959_ccs	1	7633	7561	Ser	GCT	0	0	-22.87
m64111_201213_171552_16976328_ccs	1	1498	1426	Gly	GCC	0	0	-25.04
m64111_201213_171552_17041005_ccs	1	8064	7994	Ser	TGA	0	0	-29.73
m64111_201213_171552_17041005_ccs	2	4961	4891	Gln	TTG	0	0	-29.06
m64111_201213_171552_17563904_ccs0	1	709	637	Ser	GCT	0	0	-27.34
m64111_201213_171552_17563904_ccs0	2	440	368	Gly	GCC	0	0	-29.37
m64111_201213_171552_17563904_ccs01	1	542	470	Gly	GCC	0	0	-29.37
m64111_201213_171552_17563904_ccs01	2	130	58	Ser	GCT	0	0	-22.45
m64111_201213_171552_17566333_ccs	1	6024	5954	Ser	TGA	0	0	-29.73
m64111_201213_171552_17566333_ccs	2	2920	2850	Gln	TTG	0	0	-29.06
m64111_201213_171552_17631859_ccs	1	2449	2521	Ser	GCT	0	0	-25.04
m64111_201213_171552_17760261_ccs0	1	353	281	Ser	GCT	0	0	-28.26
m64111_201213_171552_17760261_ccs01	1	713	641	Ser	GCT	0	0	-28.26
m64111_201213_171552_17761023_ccs	1	6040	5969	Val	AAC	0	0	-26.76
m64111_201213_171552_17957718_ccs	1	2789	2717	Asn	GTT	0	0	-31.14
m64111_201213_171552_18612332_ccs	1	3842	3914	Gly	TCC	0	0	-28.66
m64111_201213_171552_18613127_ccs	1	4543	4471	***	TTA	0	0	-31.14
m64111_201213_171552_18613226_ccs	1	3776	3848	Ser	GCT	0	0	-29.39
m64111_201213_171552_18613226_ccs	2	6325	6253	Ser	GCT	0	0	-28.21
m64111_201213_171552_18808875_ccs	1	1262	1334	Ser	GCT	0	0	-28.26
m64111_201213_171552_18940608_ccs	1	636	564	Ser	GCT	0	0	-28.26
m64111_201213_171552_19006485_ccs	1	938	1007	Lys	CTT	0	0	-30.62
m64111_201213_171552_19334973_ccs	1	12755	12683	Lys	CTT	0	0	-28.87
m64111_201213_171552_19335724_ccs	1	31	101	Ser	AGA	0	0	-28.03
m64111_201213_171552_19335724_ccs	2	2075	2147	Ser	GCT	0	0	-28.26
m64111_201213_171552_19663441_ccs	1	250	178	Ser	GCT	0	0	-28.26
m64111_201213_171552_86575481_ccs	1	9419	9491	Lys	CTT	0	0	-29.33
m64111_201213_171552_19793492_ccs0	1	1550	1478	Ser	GCT	0	0	-31.45
m64111_201213_171552_19793492_ccs0101	1	1351	1279	Ser	GCT	0	0	-31.45
m64111_201213_171552_19794258_ccs	1	3396	3465	Ala	AGC	0	0	-30.49
m64111_201213_171552_19925088_ccs	1	1053	1129	Gln	CTG	0	0	-28.95
m64111_201213_171552_19925088_ccs	2	6630	6558	Ser	GCT	0	0	-28.26
m64111_201213_171552_19988947_ccs	1	444	516	Ser	GCT	0	0	-28.26
m64111_201213_171552_54002256_ccs	1	4602	4529	Gln	CTG	0	0	-26.36
m64111_201213_171552_54002256_ccs	2	1210	1139	Met	CAT	0	0	-30.28
m64111_201213_171552_54003021_ccs	1	1885	1813	Asn	GTT	0	0	-24.69
m64111_201213_171552_54068598_ccs	1	6136	6065	Ala	AGC	0	0	-31.25
m64111_201213_171552_54198449_ccs00	1	357	285	Ser	GCT	0	0	-28.26
m64111_201213_171552_54198449_ccs01	1	223	151	Ser	GCT	0	0	-28.26
m64111_201213_171552_19990977_ccs	1	8036	7964	***	TTA	0	0	-31.19
m64111_201213_171552_20119869_ccs	1	5971	6043	Trp	CCA	0	0	-27.45
m64111_201213_171552_20120024_ccs0	1	146	74	Gln	CTG	0	0	-21.59
m64111_201213_171552_20252014_ccs	1	7935	8007	Asn	GTT	0	0	-28.26
m64111_201213_171552_20382371_ccs	1	5206	5278	Gly	GCC	0	0	-30.84
m64111_201213_171552_21561617_ccs	1	4221	4149	Ser	GCT	0	0	-26.08
m64111_201213_171552_21954922_ccs00	1	375	303	Ala	AGC	0	0	-30.37
m64111_201213_171552_21954922_ccs01	1	735	663	Ala	AGC	0	0	-30.37
m64111_201213_171552_21957256_ccs	1	10204	10131	Arg	TCT	0	0	-27.41
m64111_201213_171552_22022842_ccs	1	2701	2773	Ala	AGC	0	0	-23.87
m64111_201213_171552_22285114_ccs	1	3388	3460	Ser	GCT	0	0	-28.26
m64111_201213_171552_22547150_ccs	1	2174	2244	Arg	TCT	0	0	-28.78
m64111_201213_171552_22547150_ccs	2	2907	2837	Val	AAC	0	0	-28.77
m64111_201213_171552_22547150_ccs	3	975	904	Ser	AGA	0	0	-31.36
m64111_201213_171552_22547150_ccs	4	69	1	Ser	GCT	0	0	-23.37
m64111_201213_171552_22610226_ccs	1	10104	10032	Ser	GCT	0	0	-28.26
m64111_201213_171552_22807245_ccs	1	14365	14297	Asn	GTT	0	0	-30.75
m64111_201213_171552_23004187_ccs	1	5812	5884	Cys	GCA	0	0	-26.65
m64111_201213_171552_87099257_ccs	1	238	166	***	CTA	0	0	-23.42
m64111_201213_171552_87163481_ccs	1	1965	2037	Ser	ACT	0	0	-29.81
m64111_201213_171552_87228420_ccs	1	203	131	Arg	CCT	0	0	-25.37
m64111_201213_171552_23265787_ccs	1	6039	5966	Ser	ACT	0	0	-28.26
m64111_201213_171552_54722964_ccs	1	412	484	Cys	ACA	0	0	-27.57
m64111_201213_171552_23528574_ccs	1	2220	2148	Ser	GCT	0	0	-28.26
m64111_201213_171552_23593638_ccs	1	632	562	Glu	TTC	0	0	-30.54
m64111_201213_171552_23595139_ccs	1	3379	3307	Ser	GCT	0	0	-28.82
m64111_201213_171552_23659563_ccs	1	461	389	Ser	GCT	0	0	-28.26
m64111_201213_171552_23660927_ccs	1	3975	4047	Gly	TCC	0	0	-24.71
m64111_201213_171552_24707346_ccs	1	2957	2886	Pro	AGG	0	0	-23.3
m64111_201213_171552_24905380_ccs	1	3387	3459	Ala	AGC	0	0	-27.57
m64111_201213_171552_24905380_ccs	2	4146	4070	Gln	CTG	0	0	-30.08
m64111_201213_171552_25035038_ccs	1	1428	1356	Ala	AGC	0	0	-25.24
m64111_201213_171552_25036188_ccs	1	466	538	Asn	GTT	0	0	-30.69
m64111_201213_171552_25100506_ccs	1	794	721	Glu	CTC	0	0	-27.75
m64111_201213_171552_25232160_ccs	1	3735	3664	Ser	GCT	0	0	-24.83
m64111_201213_171552_25232160_ccs	2	160	88	***	TTA	0	0	-30.88
m64111_201213_171552_25363594_ccs0	1	800	872	Glu	CTC	0	0	-30.93
m64111_201213_171552_25363594_ccs01	1	456	528	Glu	CTC	0	0	-30.93
m64111_201213_171552_25494366_ccs	1	1992	1920	Lys	CTT	0	0	-29.71
m64111_201213_171552_25494366_ccs	2	706	634	Ser	GCT	0	0	-28.24
m64111_201213_171552_25495001_ccs01	1	78	8	Gly	GCC	0	0	-27.33
m64111_201213_171552_25886736_ccs	1	679	751	Phe	GAA	0	0	-29.27
m64111_201213_171552_25889196_ccs	1	1909	1838	Thr	TGT	0	0	-28.04
m64111_201213_171552_26413045_ccs	1	4831	4903	Ser	GCT	0	0	-26.09
m64111_201213_171552_26476823_ccs	1	5713	5641	Ser	ACT	0	0	-26.23
m64111_201213_171552_26609012_ccs	1	10162	10092	Ser	TGA	0	0	-29.73
m64111_201213_171552_26609012_ccs	2	7063	6993	Gln	TTG	0	0	-29.06
m64111_201213_171552_26610417_ccs	1	5156	5084	Ser	GCT	0	0	-28.26
m64111_201213_171552_26675770_ccs	1	11897	11969	Asn	GTT	0	0	-22.98
m64111_201213_171552_87296302_ccs	1	1119	1189	Thr	AGT	0	0	-28.54
m64111_201213_171552_87296302_ccs	2	2366	2438	Asn	GTT	0	0	-28.26
m64111_201213_171552_87296302_ccs	3	2890	2818	Ser	GCT	0	0	-28.79
m64111_201213_171552_87556205_ccs	1	1346	1276	Thr	GGT	0	0	-29.44
m64111_201213_171552_87622005_ccs	1	6711	6636	Gly	ACC	0	0	-28.89
m64111_201213_171552_87752715_ccs	1	7119	7049	Gln	TTG	0	0	-29.06
m64111_201213_171552_26805066_ccs	1	3566	3494	Ser	GCT	0	0	-30.62
m64111_201213_171552_26935352_ccs	1	840	910	Gln	TTG	0	0	-29.06
m64111_201213_171552_54725337_ccs	1	4020	4092	Ser	GCT	0	0	-24.55
m64111_201213_171552_54921811_ccs	1	6046	5941	Arg	TCG	0	0	-31.23
m64111_201213_171552_54986546_ccs	1	6705	6633	Asn	GTT	0	0	-28.26
m64111_201213_171552_55050538_ccs	1	2831	2759	Ser	GCT	0	0	-22.87
m64111_201213_171552_55052534_ccs	1	1629	1701	Asn	GTT	0	0	-24.64
m64111_201213_171552_27000915_ccs	1	3551	3623	Lys	CTT	0	0	-29.65
m64111_201213_171552_27001880_ccs	1	4147	4218	Ser	TGA	0	0	-29.73
m64111_201213_171552_27001880_ccs	2	7249	7319	Gln	TTG	0	0	-29.06
m64111_201213_171552_27131955_ccs	1	3186	3256	Ser	TGA	0	0	-29.73
m64111_201213_171552_27132103_ccs	1	7742	7812	Ser	TGA	0	0	-29.73
m64111_201213_171552_27132103_ccs	2	10842	10912	Gln	TTG	0	0	-29.06
m64111_201213_171552_27132894_ccs	1	388	316	Lys	CTT	0	0	-22.86
m64111_201213_171552_27133542_ccs	1	5113	5183	Ser	TGA	0	0	-29.73
m64111_201213_171552_27133542_ccs	2	10757	10687	Gln	TTG	0	0	-29.06
m64111_201213_171552_27134066_ccs	1	1512	1584	Ser	GCT	0	0	-26.65
m64111_201213_171552_27134066_ccs	2	3946	4018	Gly	TCC	0	0	-25.75
m64111_201213_171552_27199743_ccs	1	556	628	Ile	AAT	0	0	-27.96
m64111_201213_171552_27394686_ccs	1	131	59	Gln	TTG	0	0	-26.45
m64111_201213_171552_27460377_ccs	1	126	54	Gly	TCC	0	0	-31.27
m64111_201213_171552_27460938_ccs0	1	1166	1238	Ser	GCT	0	0	-29.56
m64111_201213_171552_27658981_ccs0	1	1154	1083	Gly	TCC	0	0	-27.77
m64111_201213_171552_27854482_ccs	1	5027	4955	Asn	GTT	0	0	-26.65
m64111_201213_171552_27854482_ccs	2	4835	4763	Asn	GTT	0	0	-25.04
m64111_201213_171552_28050891_ccs0	1	72	1	Ser	GCT	0	0	-23.37
m64111_201213_171552_28181629_ccs	1	21745	21817	Val	GAC	0	0	-31.75
m64111_201213_171552_28311891_ccs	1	3072	3144	Ser	GCT	0	0	-28.26
m64111_201213_171552_28311891_ccs	2	5330	5258	Ser	GCT	0	0	-31.62
m64111_201213_171552_28311891_ccs	3	4409	4337	Trp	CCA	0	0	-26.08
m64111_201213_171552_28311891_ccs	4	1391	1319	Asn	GTT	0	0	-27.13
m64111_201213_171552_28444623_ccs	1	818	890	Ser	GCT	0	0	-28.26
m64111_201213_171552_28444623_ccs	2	6477	6549	Ser	GCT	0	0	-25.74
m64111_201213_171552_28445464_ccs	1	3214	3286	Gly	TCC	0	0	-27.78
m64111_201213_171552_28771635_ccs	1	2913	2983	Arg	TCT	0	0	-27.75
m64111_201213_171552_28771635_ccs	2	2459	2387	Ser	GCT	0	0	-28.48
m64111_201213_171552_29099083_ccs0	1	82	12	Thr	TGT	0	0	-22.42
m64111_201213_171552_29428066_ccs	1	817	747	Pro	GGG	0	0	-29.8
m64111_201213_171552_29689306_ccs	1	14503	14576	Ile	AAT	0	0	-22.9
m64111_201213_171552_29886904_ccs	1	4192	4264	Ser	ACT	0	0	-20.62
m64111_201213_171552_87753414_ccs	1	6085	6157	Gly	GCC	0	0	-28.26
m64111_201213_171552_87949457_ccs	1	2267	2196	Gly	TCC	0	0	-25.51
m64111_201213_171552_55117514_ccs	1	6135	6064	Ala	AGC	0	0	-29.12
m64111_201213_171552_55182474_ccs	1	4639	4569	Ser	TGA	0	0	-29.73
m64111_201213_171552_55313334_ccs	1	10263	10335	Lys	CTT	0	0	-28.26
m64111_201213_171552_30868390_ccs	1	5872	5800	Ser	GCT	0	0	-22.86
m64111_201213_171552_30868390_ccs	2	904	833	Gly	TCC	0	0	-31.04
m64111_201213_171552_30999458_ccs	1	5975	6047	***	TTA	0	0	-28.25
m64111_201213_171552_31001232_ccs	1	2409	2484	Ile	TAT	0	0	-28.45
m64111_201213_171552_31064858_ccs	1	3772	3844	Ser	GCT	0	0	-27.56
m64111_201213_171552_31066098_ccs	1	4376	4304	Ser	GCT	0	0	-28.95
m64111_201213_171552_31261490_ccs	1	4056	3986	Gln	TTG	0	0	-29.06
m64111_201213_171552_31393480_ccs	1	1647	1575	Ile	GAT	0	0	-25.95
m64111_201213_171552_31394206_ccs	1	9344	9274	Gln	TTG	0	0	-29.06
m64111_201213_171552_31459533_ccs0	1	481	409	Ser	GCT	0	0	-30.08
m64111_201213_171552_31588750_ccs	1	29	101	Ser	GCT	0	0	-29.71
m64111_201213_171552_31590765_ccs	1	257	329	Ser	GCT	0	0	-31.09
m64111_201213_171552_31590765_ccs	2	2508	2580	Ser	GCT	0	0	-28.26
m64111_201213_171552_31590765_ccs	3	3105	3177	Lys	CTT	0	0	-31.72
m64111_201213_171552_32246000_ccs	1	1062	946	Ala	AGC	0	0	-31.43
m64111_201213_171552_32377235_ccs	1	2272	2344	Val	AAC	0	0	-29.22
m64111_201213_171552_32571746_ccs0	1	657	730	Ser	GCT	0	0	-30.82
m64111_201213_171552_32704368_ccs00	1	598	526	Cys	GCA	0	0	-30.04
m64111_201213_171552_32704368_ccs0101	1	355	283	Cys	GCA	0	0	-30.04
m64111_201213_171552_32899846_ccs	1	5453	5525	Ser	GCT	0	0	-28.26
m64111_201213_171552_32899846_ccs	2	5147	5075	Ser	GCT	0	0	-28.26
m64111_201213_171552_32967422_ccs0	1	100	28	Thr	GGT	0	0	-24.87
m64111_201213_171552_32967422_ccs010101	1	241	169	Thr	GGT	0	0	-29.76
m64111_201213_171552_33424338_ccs	1	1511	1583	Asn	ATT	0	0	-28.95
m64111_201213_171552_33489240_ccs	1	587	658	Thr	AGT	0	0	-30.7
m64111_201213_171552_33688361_ccs0	1	1004	932	Ser	GCT	0	0	-25.04
m64111_201213_171552_55574858_ccs	1	12280	12210	Ser	TGA	0	0	-29.73
m64111_201213_171552_55574858_ccs	2	9181	9111	Gln	TTG	0	0	-29.06
m64111_201213_171552_55708276_ccs	1	674	744	Ser	TGA	0	0	-29.73
m64111_201213_171552_55708276_ccs	2	3772	3842	Gln	TTG	0	0	-29.06
m64111_201213_171552_55771846_ccs0	1	117	189	Asn	ATT	0	0	-27.57
m64111_201213_171552_55771846_ccs0	2	540	612	Ser	GCT	0	0	-26.38
m64111_201213_171552_55771846_ccs01	1	177	249	Ser	GCT	0	0	-31.27
m64111_201213_171552_55771846_ccs01	2	471	543	Asn	ATT	0	0	-27.57
m64111_201213_171552_33883100_ccs	1	6561	6489	Ser	GCT	0	0	-25.74
m64111_201213_171552_33948568_ccs	1	211	139	Asp	GTC	0	0	-25.04
m64111_201213_171552_34013375_ccs	1	1668	1739	Gly	GCC	0	0	-30.93
m64111_201213_171552_34014128_ccs	1	1731	1659	Ser	ACT	0	0	-30.03
m64111_201213_171552_34342058_ccs	1	3232	3161	Ala	AGC	0	0	-31.54
m64111_201213_171552_34604413_ccs	1	4719	4642	Leu	AAG	0	0	-31.21
m64111_201213_171552_34734453_ccs	1	4374	4302	Ser	GCT	0	0	-28.26
m64111_201213_171552_34866510_ccs	1	10067	9991	Val	GAC	0	0	-26.65
m64111_201213_171552_35128741_ccs	1	1769	1698	Ser	TGA	0	0	-29.73
m64111_201213_171552_35522347_ccs	1	659	731	Ser	GCT	0	0	-24.21
m64111_201213_171552_35718207_ccs	1	6275	6203	Thr	TGT	0	0	-22.87
m64111_201213_171552_36766086_ccs	1	2806	2877	Gly	TCC	0	0	-30.48
m64111_201213_171552_36832336_ccs	1	1225	1153	Asn	GTT	0	0	-31.41
m64111_201213_171552_36963341_ccs	1	2090	2018	Ser	GCT	0	0	-28.3
m64111_201213_171552_36964265_ccs	1	2092	2020	Ser	GCT	0	0	-28.26
m64111_201213_171552_37225776_ccs	1	176	106	***	CTA	0	0	-23.77
m64111_201213_171552_37291731_ccs	1	3571	3499	Ser	ACT	0	0	-25.6
m64111_201213_171552_37422320_ccs	1	1430	1500	Ser	TGA	0	0	-29.73
m64111_201213_171552_55968110_ccs	1	2810	2881	Ala	AGC	0	0	-30.85
m64111_201213_171552_56035615_ccs	1	289	361	Asn	GTT	0	0	-23.59
m64111_201213_171552_56101289_ccs	1	4296	4368	Lys	CTT	0	0	-28.43
m64111_201213_171552_56164676_ccs	1	5840	5770	Ser	TGA	0	0	-29.73
m64111_201213_171552_37487680_ccs0	1	186	258	Ser	GCT	0	0	-27.1
m64111_201213_171552_37487680_ccs01	1	27	99	Ser	GCT	0	0	-27.1
m64111_201213_171552_38143155_ccs	1	6284	6354	Ser	TGA	0	0	-29.73
m64111_201213_171552_38143155_ccs	2	9394	9464	Gln	TTG	0	0	-29.06
m64111_201213_171552_38470521_ccs	1	1475	1547	Ser	GCT	0	0	-28.82
m64111_201213_171552_38601724_ccs	1	3383	3454	Glu	CTC	0	0	-25.39
m64111_201213_171552_38601724_ccs	2	4440	4368	Ser	GCT	0	0	-28.26
m64111_201213_171552_38864841_ccs	1	3402	3330	Asn	GTT	0	0	-30.69
m64111_201213_171552_39060405_ccs	1	1400	1472	Gly	TCC	0	0	-29.02
m64111_201213_171552_39125296_ccs	1	1542	1470	Ser	GCT	0	0	-28.26
m64111_201213_171552_39127685_ccs0	1	1163	1234	Thr	AGT	0	0	-19.62
m64111_201213_171552_39127685_ccs01	1	796	867	Thr	AGT	0	0	-24.51
m64111_201213_171552_39387419_ccs	1	2435	2508	Ile	TAT	0	0	-29.86
m64111_201213_171552_39387419_ccs	2	4356	4284	Ser	GCT	0	0	-27.34
m64111_201213_171552_39651234_ccs0	1	536	466	Gly	GCC	0	0	-13.9
m64111_201213_171552_39652135_ccs	1	5451	5521	Ala	AGC	0	0	-27.81
m64111_201213_171552_39911700_ccs	1	5436	5508	Ser	GCT	0	0	-27.99
m64111_201213_171552_39913138_ccs0	1	29	101	Leu	AAG	0	0	-29.58
m64111_201213_171552_40108033_ccs	1	3071	2999	Ser	GCT	0	0	-28.26
m64111_201213_171552_40372881_ccs010101	1	271	343	Lys	TTT	0	0	-29.3
m64111_201213_171552_40633553_ccs0	1	546	618	Ser	GCT	0	0	-25.47
m64111_201213_171552_40633553_ccs01	1	267	339	Ser	GCT	0	0	-30.37
m64111_201213_171552_89064968_ccs0	1	970	900	Thr	TGT	0	0	-27.31
m64111_201213_171552_89064968_ccs01	1	342	272	Thr	TGT	0	0	-27.31
m64111_201213_171552_89065088_ccs	1	5372	5300	Ser	GCT	0	0	-28.26
m64111_201213_171552_89130179_ccs	1	3468	3397	Leu	CAA	0	0	-31.13
m64111_201213_171552_89195211_ccs	1	1703	1628	Thr	GGT	0	0	-31.13
m64111_201213_171552_56362017_ccs	1	6530	6602	Ser	GCT	0	0	-28.21
m64111_201213_171552_56363105_ccs	1	5491	5617	Ala	GGC	0	0	-27.85
m64111_201213_171552_40896287_ccs	1	3764	3836	Lys	CTT	0	0	-30.58
m64111_201213_171552_41025793_ccs	1	8090	8162	Asn	GTT	0	0	-23.61
m64111_201213_171552_41026464_ccs	1	402	474	Ser	GCT	0	0	-28.26
m64111_201213_171552_41747278_ccs	1	4953	5025	Ser	ACT	0	0	-22.38
m64111_201213_171552_41748577_ccs	1	1139	1211	Gly	GCC	0	0	-21.97
m64111_201213_171552_41748577_ccs	2	4617	4545	Ser	GCT	0	0	-28.44
m64111_201213_171552_41877817_ccs	1	1710	1782	Ser	GCT	0	0	-26.16
m64111_201213_171552_42141491_ccs	1	2189	2117	Ser	ACT	0	0	-28.03
m64111_201213_171552_42205980_ccs	1	8176	8248	Ser	GCT	0	0	-28.82
m64111_201213_171552_42272770_ccs	1	3794	3723	Ala	AGC	0	0	-19.91
m64111_201213_171552_42272770_ccs	2	1889	1818	Gly	GCC	0	0	-27.1
m64111_201213_171552_42534830_ccs	1	2481	2409	Gly	CCC	0	0	-30.33
m64111_201213_171552_42731212_ccs	1	2615	2543	Ser	GCT	0	0	-28.26
m64111_201213_171552_42731684_ccs	1	1168	1096	Ala	TGC	0	0	-29.09
m64111_201213_171552_42795283_ccs	1	5588	5658	Ser	TGA	0	0	-29.73
m64111_201213_171552_42795283_ccs	2	8686	8756	Gln	TTG	0	0	-29.06
m64111_201213_171552_42927078_ccs	1	3937	4008	Cys	GCA	0	0	-22.87
m64111_201213_171552_42927078_ccs	2	976	904	Lys	CTT	0	0	-31.49
m64111_201213_171552_43058135_ccs	1	1881	1951	Ser	TGA	0	0	-29.73
m64111_201213_171552_43190732_ccs	1	1382	1454	Ser	GCT	0	0	-28.26
m64111_201213_171552_43190732_ccs	2	3499	3571	Ser	GCT	0	0	-28.26
m64111_201213_171552_43319667_ccs0	1	196	268	Ser	GCT	0	0	-27.16
m64111_201213_171552_43319667_ccs01	1	96	168	Ser	GCT	0	0	-27.16
m64111_201213_171552_43451472_ccs	1	431	503	Asn	GTT	0	0	-28.44
m64111_201213_171552_43714436_ccs	1	3788	3860	Asn	ATT	0	0	-26.65
m64111_201213_171552_43714873_ccs	1	5293	5221	Ser	GCT	0	0	-30.22
m64111_201213_171552_43845621_ccs	1	2630	2558	Ser	GCT	0	0	-30.22
m64111_201213_171552_56560016_ccs	1	337	265	Ser	GCT	0	0	-30.02
m64111_201213_171552_56560346_ccs	1	2597	2669	Ser	GCT	0	0	-25.04
m64111_201213_171552_56690463_ccs	1	5516	5588	Asn	GTT	0	0	-28.26
m64111_201213_171552_56755239_ccs01	1	203	275	Asn	GTT	0	0	-27.59
m64111_201213_171552_4262458_ccs	1	2521	2593	Ser	GCT	0	0	-30.08
m64111_201213_171552_4326158_ccs	1	9751	9680	Ser	TGA	0	0	-29.73
m64111_201213_171552_4326158_ccs	2	6651	6581	Gln	TTG	0	0	-29.06
m64111_201213_171552_4326878_ccs	1	9162	9092	Gln	TTG	0	0	-29.06
m64111_201213_171552_4326878_ccs	2	1189	1119	Ser	TGA	0	0	-29.73
m64111_201213_171552_4391227_ccs0	1	649	721	Leu	AAG	0	0	-24.69
m64111_201213_171552_4391227_ccs01	1	285	357	Leu	AAG	0	0	-29.58
m64111_201213_171552_76087985_ccs	1	1469	1541	Gly	TCC	0	0	-28.69
m64111_201213_171552_76087985_ccs	2	9755	9683	Ser	GCT	0	0	-28.26
m64111_201213_171552_76088306_ccs	1	8271	8199	Ile	GAT	0	0	-29.28
m64111_201213_171552_76153053_ccs	1	4462	4533	Phe	GAA	0	0	-31.21
m64111_201213_171552_76153726_ccs	1	4434	4505	Ser	AGA	0	0	-28.81
m64111_201213_171552_1049193_ccs00	1	1492	1420	Ser	GCT	0	0	-20.65
m64111_201213_171552_1049193_ccs00	2	1258	1187	Ala	AGC	0	0	-24.44
m64111_201213_171552_57214852_ccs	1	2413	2485	Ser	GCT	0	0	-22.81
m64111_201213_171552_57214852_ccs	2	2947	3019	Ser	GCT	0	0	-27.56
m64111_201213_171552_57344779_ccs	1	4200	4270	Ser	TGA	0	0	-29.73
m64111_201213_171552_57344779_ccs	2	11386	11316	Gln	TTG	0	0	-29.06
m64111_201213_171552_57606649_ccs	1	1219	1291	Ser	GCT	0	0	-27.91
m64111_201213_171552_57673619_ccs	1	4945	4873	Ser	GCT	0	0	-28.26
m64111_201213_171552_57738670_ccs	1	7893	7821	Asn	GTT	0	0	-26.62
m64111_201213_171552_57868657_ccs	1	2474	2546	Ser	GCT	0	0	-23.08
m64111_201213_171552_58197906_ccs0	1	1900	1827	Arg	CCT	0	0	-29.9
m64111_201213_171552_58197906_ccs01	1	1525	1452	Arg	CCT	0	0	-29.9
m64111_201213_171552_58524480_ccs	1	217	145	Ser	GCT	0	0	-27.57
m64111_201213_171552_58526035_ccs	1	5180	5253	Ser	GCT	0	0	-28.43
m64111_201213_171552_58852428_ccs	1	11123	11051	Cys	GCA	0	0	-27.57
m64111_201213_171552_58853711_ccs	1	997	1067	Gln	TTG	0	0	-29.06
m64111_201213_171552_58853711_ccs	2	8165	8095	Ser	TGA	0	0	-29.73
m64111_201213_171552_58983898_ccs	1	2800	2870	Gln	TTG	0	0	-29.06
m64111_201213_171552_59114690_ccs	1	5559	5629	Arg	CCT	0	0	-30.48
m64111_201213_171552_59114690_ccs	2	5428	5356	Asn	GTT	0	0	-29.51
m64111_201213_171552_59181868_ccs	1	4261	4190	Lys	CTT	0	0	-28.86
m64111_201213_171552_60033564_ccs	1	4200	4272	Gly	GCC	0	0	-29.02
m64111_201213_171552_60229951_ccs	1	2253	2323	Ser	TGA	0	0	-31.52
m64111_201213_171552_60229951_ccs	2	5352	5422	Gln	TTG	0	0	-29.06
m64111_201213_171552_60361218_ccs	1	9836	9764	Ser	GCT	0	0	-28.57
m64111_201213_171552_3801311_ccs	1	3748	3675	Gly	TCC	0	0	-25.41
m64111_201213_171552_1114787_ccs	1	7501	7429	Ser	ACT	0	0	-25.04
m64111_201213_171552_1180223_ccs	1	4126	4198	Thr	GGT	0	0	-25.73
m64111_201213_171552_1245532_ccs	1	1312	1384	Ser	GCT	0	0	-26.65
m64111_201213_171552_1245532_ccs	2	6257	6185	Ser	GCT	0	0	-22.86
m64111_201213_171552_1245532_ccs	3	5938	5866	Asn	GTT	0	0	-30.57
m64111_201213_171552_1245532_ccs	4	3561	3489	Asn	GTT	0	0	-28.26
m64111_201213_171552_60491613_ccs	1	8041	7969	Ser	GCT	0	0	-31.72
m64111_201213_171552_61211879_ccs	1	659	729	Ala	AGC	0	0	-25.47
m64111_201213_171552_61408164_ccs	1	2970	2898	Ser	GCT	0	0	-29.36
m64111_201213_171552_61474229_ccs0101	1	1105	1033	Ser	GCT	0	0	-28.26
m64111_201213_171552_61540479_ccs	1	5308	5236	Ser	GCT	0	0	-27.43
m64111_201213_171552_61604250_ccs	1	7108	7036	Gly	TCC	0	0	-28.45
m64111_201213_171552_61735140_ccs	1	10654	10726	Gly	TCC	0	0	-30.4
m64111_201213_171552_61735140_ccs	2	7393	7321	Ser	GCT	0	0	-25.04
m64111_201213_171552_61800955_ccs	1	12473	12545	Lys	CTT	0	0	-30.7
m64111_201213_171552_61803178_ccs0	1	125	197	Ser	GCT	0	0	-22.87
m64111_201213_171552_62392366_ccs0	1	734	662	His	GTG	0	0	-29.13
m64111_201213_171552_62392366_ccs01	1	1286	1214	His	GTG	0	0	-29.13
m64111_201213_171552_62652674_ccs	1	1720	1648	Ser	GCT	0	0	-26.61
m64111_201213_171552_62653481_ccs	1	5526	5598	Ala	AGC	0	0	-31.2
m64111_201213_171552_62980486_ccs	1	4608	4680	Ser	GCT	0	0	-28.48
m64111_201213_171552_62982076_ccs	1	1315	1243	Asn	GTT	0	0	-28.26
m64111_201213_171552_63243759_ccs	1	3555	3483	Ser	GCT	0	0	-25
m64111_201213_171552_63243759_ccs	2	1128	1056	Asn	GTT	0	0	-25.04
m64111_201213_171552_63441102_ccs	1	2125	2197	Ser	GCT	0	0	-28.4
m64111_201213_171552_63441102_ccs	2	7630	7703	Ala	TGC	0	0	-27.82
m64111_201213_171552_63441102_ccs	3	1317	1245	Ser	GCT	0	0	-27.54
m64111_201213_171552_63572094_ccs	1	8941	9013	Ser	GCT	0	0	-28.26
m64111_201213_171552_63635693_ccs	1	566	494	Ser	GCT	0	0	-28.26
m64111_201213_171552_63636522_ccs	1	4474	4546	Asn	ATT	0	0	-28.31
m64111_201213_171552_63636522_ccs	2	9073	9145	Ser	GCT	0	0	-22.8
m64111_201213_171552_63703898_ccs	1	2030	1955	Ser	GCT	0	0	-28.95
m64111_201213_171552_63703898_ccs	2	1856	1786	Lys	CTT	0	0	-28.62
m64111_201213_171552_63833619_ccs	1	4487	4558	Trp	CCA	0	0	-23.86
m64111_201213_171552_64160228_ccs	1	1213	1141	Ser	GCT	0	0	-28.26
m64111_201213_171552_4653748_ccs	1	2653	2724	Ser	GCT	0	0	-26.48
m64111_201213_171552_4653748_ccs	2	13253	13180	Asn	GTT	0	0	-24.48
m64111_201213_171552_4654093_ccs	1	1228	1298	Gln	TTG	0	0	-29.06
m64111_201213_171552_4654135_ccs	1	16201	16131	Gln	TTG	0	0	-29.06
m64111_201213_171552_4654135_ccs	2	2992	2922	Ser	TGA	0	0	-29.73
m64111_201213_171552_4721473_ccs	1	3276	3348	Val	CAC	0	0	-29.86
m64111_201213_171552_4721473_ccs	2	4956	5032	Thr	AGT	0	0	-30.48
m64111_201213_171552_1378833_ccs	1	544	614	Arg	TCT	0	0	-31.51
m64111_201213_171552_1443044_ccs	1	1350	1424	Ser	ACT	0	0	-30.91
m64111_201213_171552_1573637_ccs	1	3454	3526	Lys	CTT	0	0	-30.78
m64111_201213_171552_64749828_ccs	1	9918	9992	Ile	GAT	0	0	-28.3
m64111_201213_171552_65077842_ccs	1	8824	8901	Gly	GCC	0	0	-28.75
m64111_201213_171552_65339620_ccs	1	579	507	Thr	TGT	0	0	-29.4
m64111_201213_171552_65405042_ccs	1	2503	2574	Thr	GGT	0	0	-21.94
m64111_201213_171552_65536976_ccs	1	8080	8152	Ala	TGC	0	0	-31.49
m64111_201213_171552_65669754_ccs	1	4435	4362	Asn	GTT	0	0	-30.16
m64111_201213_171552_65734455_ccs	1	4180	4250	Ser	TGA	0	0	-29.73
m64111_201213_171552_65734455_ccs	2	6966	6896	Gln	TTG	0	0	-29.06
m64111_201213_171552_65799289_ccs	1	9709	9638	Ala	AGC	0	0	-30.67
m64111_201213_171552_66061449_ccs	1	8160	8088	Gly	TCC	0	0	-24.85
m64111_201213_171552_66062872_ccs	1	157	228	Ala	AGC	0	0	-29.92
m64111_201213_171552_66062872_ccs	2	1648	1721	Ser	GCT	0	0	-28.26
m64111_201213_171552_66062872_ccs	3	2054	2130	Ser	GCT	0	0	-31.45
m64111_201213_171552_66062872_ccs	4	2967	3039	Ser	GCT	0	0	-29.32
m64111_201213_171552_66191811_ccs	1	651	723	Lys	CTT	0	0	-30.48
m64111_201213_171552_66259805_ccs	1	3535	3607	Val	CAC	0	0	-30.8
m64111_201213_171552_66453639_ccs	1	1933	2005	Ser	GCT	0	0	-22.87
m64111_201213_171552_66454150_ccs	1	6975	7046	Thr	AGT	0	0	-28.78
m64111_201213_171552_66454429_ccs	1	2080	2152	Asp	ATC	0	0	-28.86
m64111_201213_171552_66454429_ccs	2	1238	1166	Tyr	ATA	0	0	-26.65
m64111_201213_171552_66978191_ccs	1	1599	1527	Thr	TGT	0	0	-28.26
m64111_201213_171552_67108954_ccs	1	224	154	Glu	CTC	0	0	-19.7
m64111_201213_171552_1705482_ccs	1	6822	6894	Asn	GTT	0	0	-27.57
m64111_201213_171552_1968500_ccs	1	4387	4468	Leu	CAG	0	0	-26.41
m64111_201213_171552_67829988_ccs0	1	2218	2290	Ser	GCT	0	0	-30.48
m64111_201213_171552_68028201_ccs	1	1660	1731	Val	AAC	0	0	-28.67
m64111_201213_171552_68159791_ccs	1	913	985	Ser	GCT	0	0	-30.37
m64111_201213_171552_68225794_ccs	1	2066	2138	Ser	GCT	0	0	-28.82
m64111_201213_171552_68354900_ccs	1	273	201	Lys	TTT	0	0	-29.75
m64111_201213_171552_68356250_ccs	1	4579	4651	Asn	GTT	0	0	-28.26
m64111_201213_171552_68356250_ccs	2	2529	2456	Thr	AGT	0	0	-27.8
m64111_201213_171552_69731453_ccs	1	3800	3728	Ser	GCT	0	0	-30.91
m64111_201213_171552_70059148_ccs	1	2679	2603	Gln	CTG	0	0	-28.44
m64111_201213_171552_70059148_ccs	2	1424	1352	Ser	GCT	0	0	-28.97
m64111_201213_171552_70059148_ccs	3	277	205	Asn	GTT	0	0	-24.86
m64111_201213_171552_70583923_ccs	1	1693	1621	Arg	TCT	0	0	-23.57
m64111_201213_171552_70650031_ccs	1	4403	4472	Lys	CTT	0	0	-29.83
m64111_201213_171552_70779477_ccs	1	2472	2401	Thr	GGT	0	0	-28.68
m64111_201213_171552_70911560_ccs	1	1149	1221	Ser	GCT	0	0	-30.48
m64111_201213_171552_70911560_ccs	2	2559	2487	Arg	CCT	0	0	-26.09
m64111_201213_171552_71043195_ccs	1	621	732	Pro	GGG	0	0	-29.85
m64111_201213_171552_71500105_ccs	1	3932	4004	Ser	GCT	0	0	-29.36
m64111_201213_171552_5375377_ccs	1	458	530	Asn	GTT	0	0	-23.9
m64111_201213_171552_5375377_ccs	2	7824	7752	Ser	GCT	0	0	-28.26
m64111_201213_171552_5375377_ccs	3	6040	5968	Asn	GTT	0	0	-28.26
m64111_201213_171552_5375377_ccs	4	4306	4234	Trp	CCA	0	0	-29.8
m64111_201213_171552_5441429_ccs	1	6023	5951	Asn	GTT	0	0	-24.47
m64111_201213_171552_71633331_ccs	1	1527	1455	Ser	GCT	0	0	-22.87
m64111_201213_171552_72287680_ccs	1	338	266	Cys	GCA	0	0	-25.04
m64111_201213_171552_72287940_ccs	1	210	138	Lys	CTT	0	0	-31.6
m64111_201213_171552_72352151_ccs	1	4189	4261	Asp	GTC	0	0	-26.46
m64111_201213_171552_72354323_ccs	1	3001	3073	Val	AAC	0	0	-26.43
m64111_201213_171552_72354323_ccs	2	3215	3287	Ser	GCT	0	0	-27.49
m64111_201213_171552_73270152_ccs	1	1271	1343	Ser	GCT	0	0	-23
m64111_201213_171552_73334793_ccs	1	7246	7317	Ala	AGC	0	0	-27.42
m64111_201213_171552_73466093_ccs0	1	133	210	Asp	GTC	0	0	-31.15
m64111_201213_171552_73466093_ccs01	1	1458	1535	Asp	GTC	0	0	-31.15
m64111_201213_171552_74188932_ccs0	1	1689	1761	Ser	GCT	0	0	-27.41
m64111_201213_171552_74188932_ccs01	1	1357	1429	Ser	GCT	0	0	-27.41
m64111_201213_171552_74253709_ccs	1	3962	4037	Gly	GCC	0	0	-29.74
m64111_201213_171552_74318492_ccs	1	1831	1903	Ser	GCT	0	0	-28.82
m64111_201213_171552_5637188_ccs	1	9334	9252	Phe	GAA	0	0	-31.74
m64111_201213_171552_5899488_ccs	1	15327	15257	Ser	TGA	0	0	-29.73
m64111_201213_171552_5899488_ccs	2	12227	12157	Gln	TTG	0	0	-29.06
m64111_201213_171552_5899866_ccs	1	1673	1745	Ser	GCT	0	0	-30.02
m64111_201213_171552_5965879_ccs	1	2930	3002	Gln	TTG	0	0	-31.34
m64111_201213_171552_2426811_ccs	1	7837	7909	Ser	GCT	0	0	-28.26
m64111_201213_171552_2427374_ccs	1	1241	1313	Ser	GCT	0	0	-28.26
m64111_201213_171552_6030153_ccs	1	1890	1962	Ser	GCT	0	0	-28.26
m64111_201213_171552_6357302_ccs	1	2093	2021	Trp	CCA	0	0	-28.96
m64111_201213_171552_6359232_ccs	1	3395	3467	Leu	TAA	0	0	-28.81
m64111_201213_171552_6489930_ccs	1	3935	4011	His	ATG	0	0	-26.65
m64111_201213_171552_6752504_ccs	1	2662	2734	Ser	GCT	0	0	-22.83
m64111_201213_171552_6883042_ccs	1	956	884	Cys	ACA	0	0	-31.31
m64111_201213_171552_7341370_ccs	1	2114	2043	Trp	CCA	0	0	-28.47
m64111_201213_171552_7341991_ccs	1	4251	4180	Ser	AGA	0	0	-29.56
m64111_201213_171552_7471690_ccs	1	4161	4334	Leu	CAA	0	0	-30.5
m64111_201213_171552_7537861_ccs	1	9650	9721	Thr	TGT	0	0	-29.53
m64111_201213_171552_7538336_ccs	1	1757	1829	Asn	GTT	0	0	-31.14
m64111_201213_171552_76480735_ccs	1	1886	1958	Lys	CTT	0	0	-22.87
m64111_201213_171552_4063666_ccs	1	135	207	Ser	GCT	0	0	-28.26
m64111_201213_171552_7997523_ccs	1	1712	1784	Gly	ACC	0	0	-31.44
m64111_201213_171552_8257575_ccs	1	6232	6160	Asn	GTT	0	0	-28.26
m64111_201213_171552_89391307_ccs	1	349	277	Ala	AGC	0	0	-29.01
m64111_201213_171552_89523565_ccs0	1	291	363	Ser	GCT	0	0	-25.35
m64111_201213_171552_89983572_ccs	1	11938	11868	Ser	TGA	0	0	-29.73
m64111_201213_171552_89983572_ccs	2	8837	8767	Gln	TTG	0	0	-29.06
m64111_201213_171552_90114738_ccs	1	250	179	***	CTA	0	0	-23.85
m64111_201213_171552_90311268_ccs0	1	619	690	Ser	GCT	0	0	-24.67
m64111_201213_171552_90637884_ccs	1	441	516	Gly	GCC	0	0	-29.74
m64111_201213_171552_90638059_ccs	1	3460	3388	Lys	CTT	0	0	-28.26
m64111_201213_171552_90638922_ccs	1	3203	3131	Ser	GCT	0	0	-28.95
m64111_201213_171552_90704301_ccs0	1	800	728	Ser	GCT	0	0	-28.42
m64111_201213_171552_90704301_ccs01	1	2614	2542	Ser	GCT	0	0	-28.42
m64111_201213_171552_90769066_ccs	1	5666	5736	Lys	TTT	0	0	-27.53
m64111_201213_171552_90833724_ccs	1	94	166	Ser	GCT	0	0	-25.04
m64111_201213_171552_91162294_ccs	1	219	292	Asn	GTT	0	0	-22.92
m64111_201213_171552_91360089_ccs	1	1660	1731	Thr	GGT	0	0	-25.04
m64111_201213_171552_91360089_ccs	2	3725	3653	Ser	GCT	0	0	-23.42
m64111_201213_171552_91425507_ccs	1	4225	4153	Ser	GCT	0	0	-28.26
m64111_201213_171552_91488265_ccs	1	296	224	Ser	ACT	0	0	-27.1
m64111_201213_171552_91621765_ccs	1	3031	2959	Asn	GTT	0	0	-28.26
m64111_201213_171552_91881539_ccs	1	866	939	Ser	GCT	0	0	-29.56
m64111_201213_171552_91881539_ccs	2	16992	16920	Ser	GCT	0	0	-28.26
m64111_201213_171552_91883315_ccs	1	2413	2485	Ser	GCT	0	0	-30.39
m64111_201213_171552_91948042_ccs	1	6583	6511	Asn	GTT	0	0	-25.04
m64111_201213_171552_92079483_ccs	1	7506	7578	Ser	GCT	0	0	-31.44
m64111_201213_171552_92079483_ccs	2	12215	12143	Lys	CTT	0	0	-23.56
m64111_201213_171552_76809655_ccs	1	4589	4659	Ser	TGA	0	0	-29.73
m64111_201213_171552_76809655_ccs	2	7688	7758	Gln	TTG	0	0	-29.06
m64111_201213_171552_77005589_ccs	1	1056	1129	Pro	TGG	0	0	-28.81
m64111_201213_171552_44304682_ccs	1	2777	2849	Ser	GCT	0	0	-26.65
m64111_201213_171552_44305212_ccs	1	3367	3439	Ala	AGC	0	0	-27.53
m64111_201213_171552_44370777_ccs	1	1841	1769	Arg	TCT	0	0	-30.99
m64111_201213_171552_92211983_ccs	1	93	23	Ser	TGA	0	0	-29.73
m64111_201213_171552_92340788_ccs	1	181	252	Asn	GTT	0	0	-30.95
m64111_201213_171552_92537310_ccs	1	62	134	Lys	CTT	0	0	-31.7
m64111_201213_171552_92537310_ccs	2	2017	2093	Asn	GTT	0	0	-28.26
m64111_201213_171552_92539152_ccs	1	2	74	Ser	GCT	0	0	-28.26
m64111_201213_171552_92605007_ccs	1	189	118	Tyr	GTA	0	0	-29.18
m64111_201213_171552_92998206_ccs	1	1588	1660	Lys	CTT	0	0	-27.57
m64111_201213_171552_93717398_ccs	1	2078	2007	Ser	GCT	0	0	-26.3
m64111_201213_171552_93718159_ccs	1	6499	6570	Gly	TCC	0	0	-19.01
m64111_201213_171552_93782994_ccs	1	5744	5816	Gly	ACC	0	0	-27.88
m64111_201213_171552_94046478_ccs	1	4630	4733	Gln	CTG	0	0	-31.3
m64111_201213_171552_94372650_ccs	1	1678	1750	Lys	CTT	0	0	-27.14
m64111_201213_171552_94700280_ccs	1	1455	1527	Ser	GCT	0	0	-31.75
m64111_201213_171552_95029933_ccs	1	12831	12904	Cys	GCA	0	0	-31.55
m64111_201213_171552_95093352_ccs	1	1093	1173	Ile	GAT	0	0	-30.14
m64111_201213_171552_95814440_ccs	1	2154	2082	Asn	GTT	0	0	-30.48
m64111_201213_171552_77203037_ccs	1	1721	1793	Ser	GCT	0	0	-28.26
m64111_201213_171552_77203037_ccs	2	4726	4797	His	GTG	0	0	-29.9
m64111_201213_171552_77204224_ccs	1	1917	1987	Val	CAC	0	0	-31.21
m64111_201213_171552_95881387_ccs	1	242	171	Gly	GCC	0	0	-29.39
m64111_201213_171552_96272488_ccs	1	1404	1332	Asn	GTT	0	0	-27.57
m64111_201213_171552_96339437_ccs0	1	117	45	Ser	GCT	0	0	-23.37
m64111_201213_171552_96404392_ccs	1	6960	7035	Ser	GCT	0	0	-25.59
m64111_201213_171552_96404392_ccs	2	3541	3469	Ser	GCT	0	0	-30.08
m64111_201213_171552_96731973_ccs	1	3137	3209	Asn	GTT	0	0	-25.04
m64111_201213_171552_96731973_ccs	2	2404	2332	Ser	GCT	0	0	-30.22
m64111_201213_171552_97125483_ccs	1	3390	3318	Ser	GCT	0	0	-26.08
m64111_201213_171552_97125971_ccs	1	69	1	Ser	GCT	0	0	-23.67
m64111_201213_171552_97191664_ccs	1	5683	5753	Gln	TTG	0	0	-29.06
m64111_201213_171552_97256099_ccs	1	171	241	Ser	TGA	0	0	-29.73
m64111_201213_171552_97256099_ccs	2	3272	3342	Gln	TTG	0	0	-29.06
m64111_201213_171552_97387582_ccs	1	1496	1568	Ser	GCT	0	0	-22.86
m64111_201213_171552_97387582_ccs	2	1689	1761	Ser	GCT	0	0	-22.87
m64111_201213_171552_97715044_ccs0	1	1768	1841	Ser	ACT	0	0	-27.38
m64111_201213_171552_97715044_ccs0	2	2105	2033	Asn	ATT	0	0	-27.21
m64111_201213_171552_97846285_ccs	1	913	985	Gly	GCC	0	0	-28.23
m64111_201213_171552_98370778_ccs	1	1476	1548	Ser	GCT	0	0	-28.26
m64111_201213_171552_98502501_ccs0	1	2499	2571	Ser	GCT	0	0	-28.26
m64111_201213_171552_98502501_ccs0	2	3865	3794	Ala	GGC	0	0	-27.81
m64111_201213_171552_98502501_ccs01	1	1999	2071	Ser	GCT	0	0	-28.26
m64111_201213_171552_98502501_ccs01	2	3367	3296	Ala	GGC	0	0	-27.81
m64111_201213_171552_98566346_ccs	1	1925	2000	Gly	GCC	0	0	-29.74
m64111_201213_171552_98698606_ccs	1	3658	3587	Val	AAC	0	0	-29.1
m64111_201213_171552_98763085_ccs	1	863	935	Ser	ACT	0	0	-30.03
m64111_201213_171552_98960054_ccs	1	3505	3577	Ser	GCT	0	0	-28.43
m64111_201213_171552_77660936_ccs0	1	52	125	Thr	TGT	0	0	-28.88
m64111_201213_171552_77793971_ccs	1	642	570	Lys	CTT	0	0	-31.38
m64111_201213_171552_44763665_ccs	1	6585	6657	Ser	GCT	0	0	-28.26
m64111_201213_171552_44828818_ccs	1	2229	2157	Ser	GCT	0	0	-28.26
m64111_201213_171552_44960441_ccs	1	6365	6294	Ala	AGC	0	0	-29.52
m64111_201213_171552_44960441_ccs	2	1443	1372	Ser	GCT	0	0	-22.86
m64111_201213_171552_99418595_ccs	1	7000	6928	Ser	GCT	0	0	-22.87
m64111_201213_171552_99615607_ccs	1	4709	4781	Arg	CCG	0	0	-29.67
m64111_201213_171552_99615607_ccs	2	4649	4577	Asn	GTT	0	0	-27.51
m64111_201213_171552_99878909_ccs	1	3376	3305	Lys	CTT	0	0	-30.67
m64111_201213_171552_99943895_ccs	1	6033	5961	Ala	TGC	0	0	-28.46
m64111_201213_171552_100270371_ccs0	1	633	560	Ser	ACT	0	0	-23.08
m64111_201213_171552_100270371_ccs01	1	194	121	Ser	ACT	0	0	-18.19
m64111_201213_171552_100270534_ccs	1	10118	10046	Asp	GTC	0	0	-30.02
m64111_201213_171552_100402453_ccs	1	3873	3800	Ser	GCT	0	0	-27.94
m64111_201213_171552_100467120_ccs	1	5330	5402	Lys	CTT	0	0	-22.87
m64111_201213_171552_100795989_ccs	1	4139	4211	His	GTG	0	0	-31.73
m64111_201213_171552_100795989_ccs	2	8229	8157	Ser	GCT	0	0	-28.26
m64111_201213_171552_100796788_ccs	1	4210	4130	Ala	AGC	0	0	-28.71
m64111_201213_171552_101188052_ccs	1	691	761	Gln	TTG	0	0	-29.06
m64111_201213_171552_101188052_ccs	2	8483	8413	Ser	TGA	0	0	-29.73
m64111_201213_171552_101320663_ccs	1	3881	3952	Val	AAC	0	0	-28.05
m64111_201213_171552_101386213_ccs	1	977	1049	Lys	CTT	0	0	-28.26
m64111_201213_171552_101647995_ccs	1	3951	4022	Glu	CTC	0	0	-22.87
m64111_201213_171552_101648717_ccs	1	779	851	Ser	GCT	0	0	-28.26
m64111_201213_171552_101910386_ccs	1	310	382	Arg	TCT	0	0	-28.43
m64111_201213_171552_101974945_ccs	1	2985	3055	Gln	TTG	0	0	-29.06
m64111_201213_171552_102107306_ccs	1	7866	7796	Ser	TGA	0	0	-29.73
m64111_201213_171552_102107306_ccs	2	4768	4698	Gln	TTG	0	0	-29.06
m64111_201213_171552_102303883_ccs	1	9979	10051	Cys	GCA	0	0	-29.47
m64111_201213_171552_102566459_ccs01	1	1514	1442	Ala	AGC	0	0	-31
m64111_201213_171552_102696244_ccs	1	5287	5358	Ala	TGC	0	0	-16.13
m64111_201213_171552_102893788_ccs	1	371	443	Ser	GCT	0	0	-25.34
m64111_201213_171552_102958994_ccs	1	2148	2076	Lys	CTT	0	0	-26.65
m64111_201213_171552_78185031_ccs	1	8190	8119	Tyr	GTA	0	0	-29.8
m64111_201213_171552_78186879_ccs0	1	1201	1270	Lys	CTT	0	0	-26.38
m64111_201213_171552_78186879_ccs0	2	3155	3086	Lys	CTT	0	0	-26.38
m64111_201213_171552_78186879_ccs0	3	466	394	Asn	GTT	0	0	-27.57
m64111_201213_171552_78186879_ccs01	1	1094	1025	Lys	CTT	0	0	-26.38
m64111_201213_171552_45417460_ccs	1	629	701	Ser	GCT	0	0	-28.26
m64111_201213_171552_45417460_ccs	2	1473	1545	Ser	CGA	0	0	-27.06
m64111_201213_171552_103153679_ccs	1	452	380	Ser	GCT	0	0	-29.66
m64111_201213_171552_103155749_ccs	1	600	528	Thr	AGT	0	0	-25.52
m64111_201213_171552_103287090_ccs	1	6396	6324	Gly	GCC	0	0	-28.61
m64111_201213_171552_103287435_ccs	1	5381	5453	Ser	GCT	0	0	-28.26
m64111_201213_171552_103352158_ccs	1	7453	7524	Thr	AGT	0	0	-22.11
m64111_201213_171552_103613900_ccs0	1	1188	1261	Cys	GCA	0	0	-27.98
m64111_201213_171552_103679568_ccs	1	2312	2382	Ser	TGA	0	0	-29.73
m64111_201213_171552_103679568_ccs	2	5412	5482	Gln	TTG	0	0	-29.06
m64111_201213_171552_103876072_ccs	1	1460	1388	Gly	GCC	0	0	-28.61
m64111_201213_171552_104138023_ccs	1	11116	11046	Gln	TTG	0	0	-29.06
m64111_201213_171552_104139093_ccs	1	4223	4151	Ser	GCT	0	0	-28.26
m64111_201213_171552_104270639_ccs	1	187	259	Asn	GTT	0	0	-27.2
m64111_201213_171552_104793519_ccs	1	6144	6072	Gly	ACC	0	0	-29.7
m64111_201213_171552_104793519_ccs	2	1627	1556	Ala	AGC	0	0	-22.76
m64111_201213_171552_104925185_ccs	1	2290	2218	Ser	GCT	0	0	-26.09
m64111_201213_171552_105448458_ccs	1	5066	5138	Pro	TGG	0	0	-25.04
m64111_201213_171552_105448458_ccs	2	7050	6978	Gly	ACC	0	0	-28.93
m64111_201213_171552_105775381_ccs	1	1657	1585	Lys	CTT	0	0	-29.28
m64111_201213_171552_105775552_ccs	1	487	558	Val	CAC	0	0	-29.99
m64111_201213_171552_105842175_ccs	1	6531	6603	Val	TAC	0	0	-30.98
m64111_201213_171552_105842175_ccs	2	1831	1760	Asn	GTT	0	0	-24.99
m64111_201213_171552_106497172_ccs	1	1240	1312	Ser	GCT	0	0	-28.26
m64111_201213_171552_106627302_ccs	1	1290	1219	Asn	GTT	0	0	-27.03
m64111_201213_171552_45549262_ccs	1	227	76	Asp	ATC	0	0	-23.44
m64111_201213_171552_78643416_ccs	1	7738	7810	Arg	TCT	0	0	-28.23
m64111_201213_171552_78643416_ccs	2	10114	10042	Ser	GCT	0	0	-30.16
m64111_201213_171552_2556925_ccs	1	5914	5986	Cys	ACA	0	0	-27.25

## Sheet: S6
Table S6: Lactate-stressed Day 12 tRNA. Full details of transfer RNA annotation.
Sequence	Number of tRNA	tRNA Start	tRNA End	tRNA Type	Anticodon	Intron Begin	Intron End	Score
m64111_201213_171552_106889553_ccs01	1	4	76	Lys	CTT	0	0	-28.12
m64111_201213_171552_107021701_ccs01	1	336	411	Val	AAC	0	0	-31.08
m64111_201213_171552_107414299_ccs	1	14230	14160	Ser	TGA	0	0	-29.73
m64111_201213_171552_107414299_ccs	2	11130	11060	Gln	TTG	0	0	-29.06
m64111_201213_171552_107742960_ccs	1	5488	5560	Asn	GTT	0	0	-31.56
m64111_201213_171552_108070796_ccs	1	874	802	Gln	CTG	0	0	-25.85
m64111_201213_171552_108200190_ccs	1	8334	8262	Ser	ACT	0	0	-23.08
m64111_201213_171552_108332256_ccs00	1	1482	1553	Val	GAC	0	0	-23.12
m64111_201213_171552_108332256_ccs010101	1	1292	1363	Val	GAC	0	0	-28.01
m64111_201213_171552_108332497_ccs	1	1067	1139	Asn	GTT	0	0	-28.26
m64111_201213_171552_109381632_ccs	1	4384	4456	Ala	AGC	0	0	-25.93
m64111_201213_171552_109774513_ccs	1	116	186	Gly	TCC	0	0	-28.95
m64111_201213_171552_2688743_ccs	1	1815	1887	Ser	GCT	0	0	-31.1
m64111_201213_171552_2949182_ccs0	1	252	180	Ser	GCT	0	0	-28.26
m64111_201213_171552_46138751_ccs0	1	362	291	Ala	TGC	0	0	-26.38
m64111_201213_171552_110037076_ccs	1	564	635	Ser	AGA	0	0	-21.36
m64111_201213_171552_110494517_ccs	1	4454	4381	Ser	GCT	0	0	-23.08
m64111_201213_171552_110627485_ccs	1	622	550	Leu	CAG	0	0	-25.38
m64111_201213_171552_110823069_ccs	1	2469	2541	Ser	GCT	0	0	-31.41
m64111_201213_171552_111411251_ccs	1	4444	4516	Lys	CTT	0	0	-26.79
m64111_201213_171552_111479554_ccs0	1	3128	3055	Met	CAT	0	0	-29.67
m64111_201213_171552_112920883_ccs	1	1983	2053	Ser	TGA	0	0	-29.73
m64111_201213_171552_113052173_ccs0	1	1776	1848	Gly	GCC	0	0	-26.14
m64111_201213_171552_113116461_ccs	1	3445	3373	Ser	GCT	0	0	-25.04
m64111_201213_171552_46467276_ccs0	1	140	65	Ala	TGC	0	0	-24.16
m64111_201213_171552_46467276_ccs010	1	429	354	Ala	TGC	0	0	-29.05
m64111_201213_171552_113705983_ccs	1	3677	3604	Ser	GCT	0	0	-28.26
m64111_201213_171552_113707750_ccs	1	1505	1577	Ser	GCT	0	0	-22.78
m64111_201213_171552_113901641_ccs	1	1074	1149	Ala	AGC	0	0	-30.4
m64111_201213_171552_113901641_ccs	2	6848	6776	Ser	GCT	0	0	-25.04
m64111_201213_171552_114493293_ccs	1	6370	6298	Ser	GCT	0	0	-28.26
m64111_201213_171552_115541815_ccs	1	4997	4925	Ser	GCT	0	0	-29.72
m64111_201213_171552_116719738_ccs	1	193	120	Tyr	GTA	0	0	-31.17
m64111_201213_171552_46859685_ccs010	1	468	396	Ser	GCT	0	0	-28.26
m64111_201213_171552_46859685_ccs0101	1	180	108	Ser	GCT	0	0	-23.37
m64111_201213_171552_46860959_ccs	1	5309	5237	Asn	GTT	0	0	-29.21
m64111_201213_171552_79429709_ccs	1	171	98	Val	CAC	0	0	-29.42
m64111_201213_171552_79432035_ccs	1	670	743	Cys	GCA	0	0	-31.19
m64111_201213_171552_79432035_ccs	2	2360	2432	Ser	GCT	0	0	-31.33
m64111_201213_171552_117443102_ccs	1	4228	4300	Asn	ATT	0	0	-30.49
m64111_201213_171552_117443102_ccs	2	188	118	Ala	AGC	0	0	-25.27
m64111_201213_171552_118294998_ccs	1	126	198	Ser	GCT	0	0	-30.48
m64111_201213_171552_118294998_ccs	2	1601	1673	Ser	GCT	0	0	-28.26
m64111_201213_171552_118426300_ccs	1	1094	1188	Pro	AGG	0	0	-31.61
m64111_201213_171552_118620550_ccs	1	1123	1047	Cys	GCA	0	0	-28.29
m64111_201213_171552_118688045_ccs	1	1175	1245	Gln	TTG	0	0	-29.06
m64111_201213_171552_119212820_ccs	1	2195	2266	Ser	GCT	0	0	-28.26
m64111_201213_171552_119605725_ccs0	1	660	587	Asn	GTT	0	0	-30.01
m64111_201213_171552_119605725_ccs01	1	233	160	Asn	GTT	0	0	-30.01
m64111_201213_171552_119735785_ccs	1	1	71	Ser	GCT	0	0	-28.26
m64111_201213_171552_120063940_ccs	1	1522	1450	Ser	GCT	0	0	-30.86
m64111_201213_171552_120127610_ccs	1	265	193	Ser	GCT	0	0	-28.26
m64111_201213_171552_120456356_ccs	1	300	227	Ala	AGC	0	0	-25.04
m64111_201213_171552_120785352_ccs	1	2504	2426	Ser	AGA	0	0	-29.97
m64111_201213_171552_120916301_ccs0	1	1803	1730	Ser	GCT	0	0	-28.26
m64111_201213_171552_120916301_ccs01	1	2526	2453	Ser	GCT	0	0	-28.26
m64111_201213_171552_121047764_ccs	1	760	688	Asn	ATT	0	0	-25.56
m64111_201213_171552_47121135_ccs	1	783	855	Ser	GCT	0	0	-19.02
m64111_201213_171552_47123160_ccs	1	6846	6918	Ser	GCT	0	0	-28.26
m64111_201213_171552_79758099_ccs	1	4439	4367	Gly	ACC	0	0	-26.95
m64111_201213_171552_79889787_ccs	1	3226	3296	Ser	TGA	0	0	-29.73
m64111_201213_171552_79889787_ccs	2	6327	6397	Gln	TTG	0	0	-29.06
m64111_201213_171552_80020282_ccs	1	5320	5247	Ser	GCT	0	0	-30.25
m64111_201213_171552_80020282_ccs	2	4227	4155	Ser	GCT	0	0	-30.65
m64111_201213_171552_80020282_ccs	3	817	744	Ser	ACT	0	0	-27.51
m64111_201213_171552_121241821_ccs0	1	155	237	Cys	GCA	0	0	-24.82
m64111_201213_171552_121241821_ccs01	1	1824	1906	Cys	GCA	0	0	-24.82
m64111_201213_171552_121242381_ccs	1	3406	3478	Lys	CTT	0	0	-31.74
m64111_201213_171552_121242381_ccs	2	5932	6004	Asn	GTT	0	0	-28.26
m64111_201213_171552_121372725_ccs0	1	102	31	Ala	AGC	0	0	-26.6
m64111_201213_171552_121372865_ccs	1	9100	9030	Ser	TGA	0	0	-29.73
m64111_201213_171552_121372865_ccs	2	6000	5930	Gln	TTG	0	0	-29.06
m64111_201213_171552_121440213_ccs	1	2761	2832	Gln	CTG	0	0	-24.48
m64111_201213_171552_121440213_ccs	2	2933	3005	Ser	GCT	0	0	-28.95
m64111_201213_171552_121440213_ccs	3	4511	4582	Gln	CTG	0	0	-29.56
m64111_201213_171552_121440213_ccs	4	5600	5672	Ser	GCT	0	0	-23.54
m64111_201213_171552_121634847_ccs0	1	478	550	Ser	GCT	0	0	-31.7
m64111_201213_171552_121637006_ccs	1	300	372	Lys	CTT	0	0	-26.65
m64111_201213_171552_121637006_ccs	2	3693	3765	Ser	GCT	0	0	-28.26
m64111_201213_171552_121637006_ccs	3	3243	3171	Ser	GCT	0	0	-30.37
m64111_201213_171552_121637006_ccs	4	646	574	Ser	ACT	0	0	-28.26
m64111_201213_171552_121899466_ccs0	1	314	242	Arg	TCT	0	0	-28.26
m64111_201213_171552_121899466_ccs01	1	707	635	Arg	TCT	0	0	-28.26
m64111_201213_171552_123142844_ccs	1	7021	7094	Asn	GTT	0	0	-28.26
m64111_201213_171552_123142844_ccs	2	6438	6366	Ser	GCT	0	0	-20.22
m64111_201213_171552_123208608_ccs	1	159	234	Ala	GGC	0	0	-30.95
m64111_201213_171552_123208608_ccs	2	420	492	Ser	GCT	0	0	-28.26
m64111_201213_171552_123798000_ccs	1	1649	1722	Ser	GCT	0	0	-24.93
m64111_201213_171552_124453138_ccs	1	6791	6863	Ser	GCT	0	0	-28.26
m64111_201213_171552_124453138_ccs	2	7631	7703	Ser	CGA	0	0	-27.06
m64111_201213_171552_125043537_ccs0	1	912	981	Ala	GGC	0	0	-27.81
m64111_201213_171552_47581811_ccs0	1	889	961	Asn	GTT	0	0	-31.04
m64111_201213_171552_47581811_ccs01	1	468	540	Asn	GTT	0	0	-31.04
m64111_201213_171552_80087228_ccs	1	439	368	Gln	CTG	0	0	-30.71
m64111_201213_171552_80413332_ccs	1	2642	2712	Ala	TGC	0	0	-25.81
m64111_201213_171552_80478647_ccs	1	11558	11488	Ser	TGA	0	0	-29.73
m64111_201213_171552_80478647_ccs	2	8452	8381	Lys	TTT	0	0	-29.06
m64111_201213_171552_125174670_ccs	1	6172	6101	Ser	ACT	0	0	-26.29
m64111_201213_171552_125239317_ccs	1	6974	7046	Lys	CTT	0	0	-28.61
m64111_201213_171552_125438765_ccs	1	2060	2132	Ser	GCT	0	0	-23.37
m64111_201213_171552_125700883_ccs	1	3818	3890	Asn	GTT	0	0	-23.27
m64111_201213_171552_126091465_ccs	1	5045	4973	Lys	CTT	0	0	-27.65
m64111_201213_171552_126091465_ccs	2	3879	3808	Thr	TGT	0	0	-27.31
m64111_201213_171552_126157485_ccs00	1	294	366	Gly	TCC	0	0	-25.78
m64111_201213_171552_126157485_ccs0101	1	944	1016	Gly	TCC	0	0	-25.78
m64111_201213_171552_126223260_ccs	1	1593	1665	Asn	GTT	0	0	-28.26
m64111_201213_171552_126223260_ccs	2	4412	4342	Ala	AGC	0	0	-27.07
m64111_201213_171552_126224902_ccs	1	7302	7374	Asn	GTT	0	0	-28.26
m64111_201213_171552_126288920_ccs	1	10177	10104	Cys	GCA	0	0	-30.84
m64111_201213_171552_126877928_ccs	1	407	479	Ser	GCT	0	0	-28.12
m64111_201213_171552_126877928_ccs	2	2429	2357	Ser	GCT	0	0	-25.04
m64111_201213_171552_127076237_ccs	1	575	646	Asp	ATC	0	0	-30.52
m64111_201213_171552_127795361_ccs	1	3809	3737	Arg	CCT	0	0	-22.58
m64111_201213_171552_127795496_ccs0	1	4030	3960	Leu	AAG	0	0	-26.93
m64111_201213_171552_127796950_ccs0	1	775	847	Gly	ACC	0	0	-28.05
m64111_201213_171552_127796950_ccs01	1	5	77	Gly	ACC	0	0	-28.05
m64111_201213_171552_127993856_ccs	1	3120	3192	Ser	GCT	0	0	-28.26
m64111_201213_171552_127993856_ccs	2	2791	2719	Asn	GTT	0	0	-23.84
m64111_201213_171552_128256533_ccs0	1	169	241	Ser	GCT	0	0	-17.97
m64111_201213_171552_128320981_ccs00	1	419	490	Asn	GTT	0	0	-31.34
m64111_201213_171552_128517887_ccs	1	916	845	Ala	AGC	0	0	-28.21
m64111_201213_171552_80675444_ccs	1	160	90	Gly	GCC	0	0	-30.16
m64111_201213_171552_48105239_ccs	1	798	870	Ser	GCT	0	0	-28.95
m64111_201213_171552_129107607_ccs	1	5351	5421	Ser	TGA	0	0	-29.73
m64111_201213_171552_129107607_ccs	2	8457	8527	Gln	TTG	0	0	-29.06
m64111_201213_171552_129238669_ccs	1	604	676	Met	CAT	0	0	-24.77
m64111_201213_171552_130222819_ccs	1	1416	1344	Ser	GCT	0	0	-25.04
m64111_201213_171552_130222819_ccs	2	293	220	Val	CAC	0	0	-29.75
m64111_201213_171552_130482331_ccs	1	6653	6724	Ala	AGC	0	0	-29.6
m64111_201213_171552_130484246_ccs	1	692	764	Leu	CAG	0	0	-30.35
m64111_201213_171552_130616133_ccs	1	584	512	Ser	GCT	0	0	-30.39
m64111_201213_171552_130680210_ccs	1	209	137	Ala	GGC	0	0	-30.95
m64111_201213_171552_130680646_ccs	1	4342	4270	Ser	GCT	0	0	-28.26
m64111_201213_171552_131137813_ccs	1	4195	4267	Asn	GTT	0	0	-28.26
m64111_201213_171552_131530979_ccs	1	901	820	Leu	CAA	0	0	-29.36
m64111_201213_171552_131664687_ccs	1	2940	3012	Lys	CTT	0	0	-29.33
m64111_201213_171552_132056942_ccs	1	1460	1530	Ser	TGA	0	0	-29.73
m64111_201213_171552_132056942_ccs	2	4560	4630	Gln	TTG	0	0	-28.24
m64111_201213_171552_132121545_ccs	1	8325	8397	Ser	GCT	0	0	-27
m64111_201213_171552_132122832_ccs	1	3664	3736	Thr	GGT	0	0	-28.29
m64111_201213_171552_48497784_ccs	1	4295	4224	Gly	TCC	0	0	-30.48
m64111_201213_171552_48497784_ccs	2	3472	3400	Lys	CTT	0	0	-31.15
m64111_201213_171552_81002867_ccs	1	6251	6323	Ser	GCT	0	0	-31.03
m64111_201213_171552_133236594_ccs0	1	391	463	Ser	ACT	0	0	-26.58
m64111_201213_171552_133236594_ccs01	1	597	669	Ser	ACT	0	0	-21.69
m64111_201213_171552_133300803_ccs	1	1286	1358	Ser	GCT	0	0	-28.95
m64111_201213_171552_9438963_ccs	1	2743	2673	Ser	TGA	0	0	-29.73
m64111_201213_171552_48759464_ccs0	1	139	67	Lys	CTT	0	0	-23.72
m64111_201213_171552_48890695_ccs	1	3055	2983	Ser	GCT	0	0	-28.95
m64111_201213_171552_81397335_ccs	1	4901	4829	Asn	GTT	0	0	-27.57
m64111_201213_171552_81529350_ccs	1	9451	9523	Ser	GCT	0	0	-19.93
m64111_201213_171552_10945354_ccs	1	7173	7101	Ser	GCT	0	0	-25.04
m64111_201213_171552_11076750_ccs0	1	913	985	Ser	GCT	0	0	-28.26
m64111_201213_171552_11076750_ccs01	1	559	631	Ser	GCT	0	0	-28.26
m64111_201213_171552_11142807_ccs0	1	884	957	Tyr	GTA	0	0	-27.32
m64111_201213_171552_11142807_ccs01	1	622	695	Tyr	GTA	0	0	-27.32
m64111_201213_171552_11405048_ccs0	1	1203	1273	Gly	TCC	0	0	-30.87
m64111_201213_171552_11405048_ccs010	1	721	791	Gly	TCC	0	0	-30.87
m64111_201213_171552_11405236_ccs	1	561	633	Ser	GCT	0	0	-28.45
m64111_201213_171552_11405236_ccs	2	1226	1154	Ser	GCT	0	0	-26.65
m64111_201213_171552_12058703_ccs	1	5004	5073	Ala	AGC	0	0	-28.87
m64111_201213_171552_12782246_ccs	1	658	730	Ser	GCT	0	0	-28.26
m64111_201213_171552_134547880_ccs	1	4213	4283	Gly	TCC	0	0	-29.84
m64111_201213_171552_135007063_ccs	1	6066	5994	Ser	GCT	0	0	-28.95
m64111_201213_171552_135007063_ccs	2	3571	3499	Ser	GCT	0	0	-28.26
m64111_201213_171552_81789534_ccs	1	69	141	Ala	AGC	0	0	-23.22
m64111_201213_171552_135990104_ccs	1	476	546	Gln	TTG	0	0	-29.06
m64111_201213_171552_135990104_ccs	2	9841	9771	Ser	TGA	0	0	-29.73
m64111_201213_171552_136578646_ccs	1	203	273	Gln	TTG	0	0	-29.06
m64111_201213_171552_137038364_ccs	1	251	323	Ser	GCT	0	0	-25.04
m64111_201213_171552_137038545_ccs	1	478	550	Ala	AGC	0	0	-28.45
m64111_201213_171552_137953522_ccs0	1	755	682	Asn	GTT	0	0	-31.53
m64111_201213_171552_137953522_ccs01	1	1635	1562	Asn	GTT	0	0	-31.53
m64111_201213_171552_138215698_ccs	1	5573	5503	Ser	TGA	0	0	-29.73
m64111_201213_171552_138937258_ccs	1	1095	1167	Tyr	ATA	0	0	-28.86
m64111_201213_171552_49545393_ccs	1	118	190	Ser	GCT	0	0	-28.26
m64111_201213_171552_82379520_ccs	1	524	596	Asn	GTT	0	0	-22.12
m64111_201213_171552_82380750_ccs01	1	122	50	Lys	CTT	0	0	-31.63
m64111_201213_171552_526805_ccs	1	4020	3932	Leu	CAG	0	0	-31.39
m64111_201213_171552_139657248_ccs	1	3954	3883	Ser	TGA	0	0	-29.73
m64111_201213_171552_139657248_ccs	2	857	786	Gln	TTG	0	0	-29.06
m64111_201213_171552_139788530_ccs	1	2789	2861	Asn	GTT	0	0	-26.65
m64111_201213_171552_140315034_ccs01	1	3227	3155	Ser	GCT	0	0	-28.26
m64111_201213_171552_140575175_ccs	1	220	291	Val	AAC	0	0	-30.12
m64111_201213_171552_140706775_ccs	1	1442	1514	Lys	CTT	0	0	-22.38
m64111_201213_171552_141231156_ccs	1	5950	6023	Thr	AGT	0	0	-28.35
m64111_201213_171552_141756158_ccs	1	2669	2741	Ser	GCT	0	0	-28.26
m64111_201213_171552_142149285_ccs	1	3212	3140	Ser	GCT	0	0	-28.26
m64111_201213_171552_142608925_ccs	1	4375	4448	Ser	GCT	0	0	-31.78
m64111_201213_171552_49809145_ccs0	1	1415	1487	Ser	GCT	0	0	-28.26
m64111_201213_171552_49809145_ccs01	1	1162	1234	Ser	GCT	0	0	-28.26
m64111_201213_171552_3080845_ccs	1	2458	2530	Gly	ACC	0	0	-31.44
m64111_201213_171552_50071359_ccs	1	3015	3087	Lys	CTT	0	0	-30.86
m64111_201213_171552_142934623_ccs00	1	151	79	Lys	CTT	0	0	-29.5
m64111_201213_171552_142934623_ccs0101	1	100	28	Lys	CTT	0	0	-24.61
m64111_201213_171552_144245610_ccs	1	3871	3799	Ser	GCT	0	0	-28.26
m64111_201213_171552_144507430_ccs	1	972	1043	Glu	CTC	0	0	-27.81
m64111_201213_171552_144900644_ccs	1	7288	7218	Ser	TGA	0	0	-29.73
m64111_201213_171552_144902042_ccs	1	3673	3601	Ser	GCT	0	0	-22.42
m64111_201213_171552_145099237_ccs	1	226	298	Lys	CTT	0	0	-28.26
m64111_201213_171552_145163291_ccs	1	751	823	Thr	TGT	0	0	-25.93
m64111_201213_171552_145230443_ccs	1	1291	1219	Asn	GTT	0	0	-28.26
m64111_201213_171552_145753883_ccs00	1	555	483	Cys	GCA	0	0	-22.87
m64111_201213_171552_145753883_ccs0101	1	288	216	Cys	GCA	0	0	-22.87
m64111_201213_171552_146409407_ccs0	1	160	70	Leu	TAA	0	0	-27.96
m64111_201213_171552_50200784_ccs	1	624	696	Ser	GCT	0	0	-22.38
m64111_201213_171552_82707535_ccs0	1	1173	1100	Ser	ACT	0	0	-25.92
m64111_201213_171552_82707535_ccs01	1	659	586	Ser	ACT	0	0	-25.92
m64111_201213_171552_147391042_ccs0	1	153	84	Ile	AAT	0	0	-29.85
m64111_201213_171552_147391042_ccs0101	1	115	46	Ile	AAT	0	0	-29.85
m64111_201213_171552_147982220_ccs	1	1541	1612	Met	CAT	0	0	-26.45
m64111_201213_171552_148047471_ccs	1	83	7	Thr	GGT	0	0	-31.62
m64111_201213_171552_149225979_ccs	1	114	185	Ala	GGC	0	0	-26.64
m64111_201213_171552_149815727_ccs	1	3184	3112	Glu	CTC	0	0	-29.92
m64111_201213_171552_50463549_ccs	1	2358	2430	Ser	GCT	0	0	-28.56
m64111_201213_171552_82904962_ccs00	1	477	549	Ser	GCT	0	0	-28.26
m64111_201213_171552_82904962_ccs0101	1	249	321	Ser	GCT	0	0	-28.26
m64111_201213_171552_83036278_ccs	1	380	308	Ala	AGC	0	0	-29.66
m64111_201213_171552_83165620_ccs	1	3950	3880	Gly	TCC	0	0	-28.73
m64111_201213_171552_151323925_ccs	1	2267	2337	Gln	TTG	0	0	-29.06
m64111_201213_171552_151323925_ccs	2	15458	15528	Ser	TGA	0	0	-29.73
m64111_201213_171552_151456551_ccs	1	2354	2426	Glu	TTC	0	0	-31.65
m64111_201213_171552_152240935_ccs0	1	1076	1003	Val	AAC	0	0	-30.39
m64111_201213_171552_152240935_ccs01	1	2238	2165	Val	AAC	0	0	-30.39
m64111_201213_171552_153158665_ccs	1	2922	3022	Lys	CTT	0	0	-30.48
m64111_201213_171552_153158666_ccs	1	204	129	Gly	GCC	0	0	-29.72
m64111_201213_171552_153159975_ccs	1	2091	2160	Ala	AGC	0	0	-28.87
m64111_201213_171552_153878829_ccs	1	130	201	Trp	CCA	0	0	-31.6
m64111_201213_171552_154208856_ccs	1	1400	1472	Asn	GTT	0	0	-29.32
m64111_201213_171552_154797747_ccs	1	83	164	Gln	CTG	0	0	-31.28
m64111_201213_171552_155254971_ccs	1	169	97	Ser	AGA	0	0	-29.24
m64111_201213_171552_155648290_ccs0	1	141	69	Gly	TCC	0	0	-20.58
m64111_201213_171552_155846630_ccs	1	712	641	Thr	AGT	0	0	-29.26
m64111_201213_171552_156437076_ccs	1	8205	8135	Ser	TGA	0	0	-29.73
m64111_201213_171552_156437076_ccs	2	5107	5035	Gln	TTG	0	0	-29.06
m64111_201213_171552_156764770_ccs	1	800	872	Asn	GTT	0	0	-28.26
m64111_201213_171552_157352569_ccs	1	501	430	Glu	CTC	0	0	-18.75
m64111_201213_171552_157745169_ccs	1	174	246	Ser	GCT	0	0	-26.85
m64111_201213_171552_157745169_ccs	2	4978	5050	Ser	GCT	0	0	-28.26
m64111_201213_171552_157745169_ccs	3	3113	3041	Thr	GGT	0	0	-25.74
m64111_201213_171552_157747815_ccs0	1	484	412	Asp	GTC	0	0	-29.04
m64111_201213_171552_157747815_ccs01	1	370	298	Asp	GTC	0	0	-29.04
m64111_201213_171552_83887179_ccs	1	5667	5739	Ser	GCT	0	0	-27.35
m64111_201213_171552_158336127_ccs0	1	543	471	Ser	GCT	0	0	-28.26
m64111_201213_171552_158336127_ccs01	1	2788	2719	Val	AAC	0	0	-29.58
m64111_201213_171552_158599870_ccs	1	2807	2737	Tyr	ATA	0	0	-26.27
m64111_201213_171552_158729097_ccs	1	1500	1572	Ser	GCT	0	0	-28.26
m64111_201213_171552_158794679_ccs01	1	553	480	Ala	GGC	0	0	-30.55
m64111_201213_171552_158993207_ccs0	1	172	100	Ser	GCT	0	0	-22.94
m64111_201213_171552_158993207_ccs01	1	2174	2102	Ser	GCT	0	0	-27.83
m64111_201213_171552_159058375_ccs	1	8106	8185	Ala	AGC	0	0	-28.53
m64111_201213_171552_159253519_ccs	1	1807	1735	Ser	GCT	0	0	-28.26
m64111_201213_171552_159580799_ccs0	1	61	133	Ser	GCT	0	0	-28.56
m64111_201213_171552_159975792_ccs0	1	1315	1386	Ala	GGC	0	0	-31.33
m64111_201213_171552_159975792_ccs01	1	391	462	Ala	GGC	0	0	-31.33
m64111_201213_171552_160302281_ccs	1	249	177	Arg	TCT	0	0	-26.09
m64111_201213_171552_160498167_ccs	1	889	961	Ser	GCT	0	0	-28.26
m64111_201213_171552_160827270_ccs0	1	848	776	Ser	GCT	0	0	-30.25
m64111_201213_171552_160827270_ccs01	1	695	623	Ser	GCT	0	0	-30.25
m64111_201213_171552_161220034_ccs	1	8133	8205	Ser	GCT	0	0	-28.31
m64111_201213_171552_161220049_ccs	1	9852	9934	Ala	TGC	0	0	-30.05
m64111_201213_171552_51972345_ccs0	1	51	122	***	CTA	0	0	-25.63
m64111_201213_171552_51972345_ccs01	1	547	618	***	CTA	0	0	-20.73
m64111_201213_171552_161415439_ccs	1	2738	2810	Lys	CTT	0	0	-28.26
m64111_201213_171552_161415439_ccs	2	6355	6427	Lys	CTT	0	0	-30.03
m64111_201213_171552_161614130_ccs0	1	414	484	Glu	CTC	0	0	-22.68
m64111_201213_171552_162138409_ccs	1	3126	3197	Thr	GGT	0	0	-25.04
m64111_201213_171552_162532091_ccs	1	7566	7494	Lys	CTT	0	0	-30.59
m64111_201213_171552_162793037_ccs	1	10723	10796	Leu	TAA	0	0	-28.36
m64111_201213_171552_162793037_ccs	2	9709	9637	Ser	GCT	0	0	-28.26
m64111_201213_171552_163971354_ccs	1	773	845	Cys	GCA	0	0	-22.87
m64111_201213_171552_164038140_ccs	1	877	949	Ser	GCT	0	0	-26.09
m64111_201213_171552_164104840_ccs0	1	2277	2206	Leu	CAA	0	0	-26.46
m64111_201213_171552_164104840_ccs01	1	1630	1559	Leu	CAA	0	0	-26.46
m64111_201213_171552_164169049_ccs	1	288	360	Ser	GCT	0	0	-28.24
m64111_201213_171552_164431929_ccs	1	5938	6009	Ala	AGC	0	0	-25.98
m64111_201213_171552_52037180_ccs	1	6059	6131	Gly	GCC	0	0	-28.26
m64111_201213_171552_52038071_ccs	1	2821	2891	Gln	TTG	0	0	-29.06
m64111_201213_171552_84476124_ccs	1	8465	8541	Thr	GGT	0	0	-29.15
m64111_201213_171552_84476124_ccs	2	8965	9037	Ser	GCT	0	0	-25.04
m64111_201213_171552_84476124_ccs	3	12657	12586	Ala	AGC	0	0	-29.02
m64111_201213_171552_84478632_ccs	1	7441	7512	Thr	TGT	0	0	-28.16
m64111_201213_171552_52429397_ccs	1	768	842	Trp	AAA	0	0	-27.77
m64111_201213_171552_165480822_ccs	1	3491	3563	Ser	GCT	0	0	-28.26
m64111_201213_171552_165939412_ccs	1	5021	4949	Ser	GCT	0	0	-28.26
m64111_201213_171552_166134324_ccs	1	3508	3580	Ser	GCT	0	0	-28.26
m64111_201213_171552_166202151_ccs01	1	108	188	Lys	CTT	0	0	-27.46
m64111_201213_171552_166789878_ccs	1	3301	3229	Ala	TGC	0	0	-29.51
m64111_201213_171552_167706706_ccs	1	7822	7894	Lys	CTT	0	0	-26.08
m64111_201213_171552_168495078_ccs	1	2008	2080	Ser	GCT	0	0	-28.26
m64111_201213_171552_168495508_ccs0	1	928	999	Asp	GTC	0	0	-22.62
m64111_201213_171552_168624186_ccs	1	10735	10807	Gly	TCC	0	0	-31.75
m64111_201213_171552_168624186_ccs	2	1408	1336	Gly	GCC	0	0	-28.26
m64111_201213_171552_168757580_ccs	1	2631	2703	Ser	GCT	0	0	-25.73
m64111_201213_171552_168757580_ccs	2	1447	1375	Ser	ACT	0	0	-25.39
m64111_201213_171552_168757580_ccs	3	203	131	Ser	GCT	0	0	-18.79
m64111_201213_171552_169411867_ccs	1	7210	7133	Lys	CTT	0	0	-30.45
m64111_201213_171552_169607802_ccs	1	1106	1176	Ser	TGA	0	0	-29.73
m64111_201213_171552_169609680_ccs	1	8407	8477	Ser	TGA	0	0	-29.73
m64111_201213_171552_169609680_ccs	2	11506	11576	Gln	TTG	0	0	-29.06
m64111_201213_171552_170395471_ccs	1	6444	6374	Gln	TTG	0	0	-29.06
m64111_201213_171552_170787963_ccs	1	1227	1299	Gly	TCC	0	0	-26.79
m64111_201213_171552_171050335_ccs	1	309	238	His	GTG	0	0	-31.73
m64111_201213_171552_171114916_ccs0	1	381	309	Lys	CTT	0	0	-28.95
m64111_201213_171552_171114916_ccs01	1	297	225	Lys	CTT	0	0	-28.95
m64111_201213_171552_171313119_ccs	1	376	448	Ser	GCT	0	0	-28.26
m64111_201213_171552_171771450_ccs	1	5016	4944	Ser	GCT	0	0	-28.26
m64111_201213_171552_172952275_ccs	1	4679	4752	Trp	CCA	0	0	-29.18
m64111_201213_171552_85067993_ccs	1	2607	2535	Ser	GCT	0	0	-29.75
m64111_201213_171552_85067993_ccs	2	1225	1153	Glu	CTC	0	0	-21.7
m64111_201213_171552_85328452_ccs	1	1251	1179	Asn	GTT	0	0	-23.91
m64111_201213_171552_85395247_ccs	1	553	627	Ser	GCT	0	0	-28.26
m64111_201213_171552_53085452_ccs	1	4422	4350	Ser	GCT	0	0	-28.26
m64111_201213_171552_173147144_ccs00	1	178	250	Ser	GCT	0	0	-28.3
m64111_201213_171552_173147144_ccs01	1	517	589	Ser	GCT	0	0	-28.3
m64111_201213_171552_173475643_ccs	1	10993	11063	Ser	TGA	0	0	-29.73
m64111_201213_171552_173475643_ccs	2	14091	14161	Gln	TTG	0	0	-29.06
m64111_201213_171552_173738624_ccs	1	319	396	Glu	CTC	0	0	-29.72
m64111_201213_171552_173804068_ccs	1	942	870	Ser	GCT	0	0	-28.26
m64111_201213_171552_173867733_ccs	1	479	549	Gln	TTG	0	0	-29.06
m64111_201213_171552_173867733_ccs	2	13668	13738	Ser	TGA	0	0	-29.73
m64111_201213_171552_174065639_ccs	1	2468	2540	Lys	CTT	0	0	-29.17
m64111_201213_171552_174262692_ccs0	1	1208	1280	Lys	CTT	0	0	-30.48
m64111_201213_171552_174262692_ccs01	1	255	327	Lys	CTT	0	0	-30.48
m64111_201213_171552_174327940_ccs01	1	802	875	Ser	GCT	0	0	-28.26
m64111_201213_171552_174654956_ccs	1	3229	3301	Thr	GGT	0	0	-26.29
m64111_201213_171552_175376320_ccs0	1	326	254	Ser	GCT	0	0	-30.08
m64111_201213_171552_175440723_ccs	1	14462	14392	Gln	TTG	0	0	-29.06
m64111_201213_171552_175440723_ccs	2	1268	1198	Ser	TGA	0	0	-29.73
m64111_201213_171552_175441249_ccs	1	2233	2161	Ser	GCT	0	0	-27.73
m64111_201213_171552_175704366_ccs	1	2302	2374	Asn	GTT	0	0	-26.65
m64111_201213_171552_175834961_ccs	1	10000	9930	Ser	TGA	0	0	-29.73
m64111_201213_171552_175834961_ccs	2	6900	6830	Gln	TTG	0	0	-29.06
m64111_201213_171552_85591110_ccs01	1	335	263	Ser	ACT	0	0	-27.27
m64111_201213_171552_85656223_ccs	1	4891	4818	Ser	GCT	0	0	-25.04
m64111_201213_171552_76155731_ccs01	1	97	25	Leu	GAG	0	0	-29.81
m64111_201213_171552_53413564_ccs	1	3477	3549	Ser	GCT	0	0	-28.86
m64111_201213_171552_787254_ccs	1	9261	9191	Ser	TGA	0	0	-29.73
m64111_201213_171552_176424968_ccs	1	1408	1336	Arg	CCT	0	0	-22.58
m64111_201213_171552_176883045_ccs	1	11525	11597	Ser	GCT	0	0	-27.52
m64111_201213_171552_176883045_ccs	2	11824	11896	Arg	TCG	0	0	-29.15
m64111_201213_171552_177012987_ccs01	1	400	328	Ser	GCT	0	0	-31.08
m64111_201213_171552_177210895_ccs00	1	60	132	Lys	CTT	0	0	-27.38
m64111_201213_171552_177932842_ccs00	1	105	177	Ser	GCT	0	0	-28.26
m64111_201213_171552_177932842_ccs00	2	3446	3518	Ala	AGC	0	0	-26.54
m64111_201213_171552_178849446_ccs	1	3798	3870	Ser	GCT	0	0	-29.14
m64111_201213_171552_179898540_ccs	1	1093	1022	Val	AAC	0	0	-28.94
m64111_201213_171552_3343699_ccs	1	1512	1584	Lys	CTT	0	0	-27.38
m64111_201213_171552_53413652_ccs	1	1124	1195	Glu	TTC	0	0	-27.08
m64111_201213_171552_53543279_ccs0	1	221	142	Arg	CCT	0	0	-29.33
m64111_201213_171552_180421191_ccs	1	1013	1085	Ser	GCT	0	0	-31.69
m64111_201213_171552_180488284_ccs	1	7442	7514	Ser	GCT	0	0	-26.18
m64111_201213_171552_180554515_ccs0	1	170	242	Ser	GCT	0	0	-25.04
m64111_201213_171552_180554515_ccs01	1	605	677	Ser	GCT	0	0	-25.04
m64111_201213_171552_13043937_ccs	1	3328	3400	Arg	CCT	0	0	-28.26
m64111_201213_171552_13043937_ccs	2	3621	3549	Ser	ACT	0	0	-24.85
m64111_201213_171552_14485671_ccs	1	7167	7237	Ser	TGA	0	0	-29.73
m64111_201213_171552_14485671_ccs	2	3087	3017	Gln	TTG	0	0	-29.06
m64111_201213_171552_14680073_ccs	1	855	927	Ser	GCT	0	0	-28.26
m64111_201213_171552_15467653_ccs	1	3817	3889	Ser	GCT	0	0	-30.4
m64111_201213_171552_15468971_ccs0	1	1373	1445	Ser	GCT	0	0	-27.2
m64111_201213_171552_15468971_ccs01	1	897	969	Ser	GCT	0	0	-27.2
m64111_201213_171552_15598275_ccs	1	785	713	Ser	GCT	0	0	-28.26
m64111_201213_171552_15599154_ccs	1	2232	2160	Ser	GCT	0	0	-28.15
m64111_201213_171552_15729431_ccs010	1	551	480	Lys	CTT	0	0	-31.14
m64111_201213_171552_15729431_ccs0101	1	1216	1145	Lys	CTT	0	0	-31.14
m64111_201213_171552_15795409_ccs	1	1874	1802	Ser	GCT	0	0	-22.38
m64111_201213_171552_15795409_ccs	2	1703	1634	Gly	TCC	0	0	-27.85
m64111_201213_171552_15796402_ccs	1	6618	6546	Ser	GCT	0	0	-27.2
m64111_201213_171552_15927941_ccs	1	1650	1578	Lys	CTT	0	0	-29.75
m64111_201213_171552_86116011_ccs	1	9518	9590	Asn	GTT	0	0	-25.17
m64111_201213_171552_86180249_ccs0	1	208	280	Gln	CTG	0	0	-30.71
m64111_201213_171552_17171121_ccs01	1	138	66	Lys	CTT	0	0	-27.42
m64111_201213_171552_17631925_ccs	1	217	146	Val	TAC	0	0	-30.78
m64111_201213_171552_17891370_ccs	1	1151	1222	Ser	AGA	0	0	-26.6
m64111_201213_171552_17891370_ccs	2	5084	5012	Lys	CTT	0	0	-27.54
m64111_201213_171552_18351175_ccs	1	177	104	Asn	GTT	0	0	-28.16
m64111_201213_171552_18417358_ccs	1	2147	2071	Ala	GGC	0	0	-27.35
m64111_201213_171552_86444333_ccs01	1	257	185	Ser	GCT	0	0	-31.18
m64111_201213_171552_54264561_ccs	1	3691	3619	Ser	GCT	0	0	-27.77
m64111_201213_171552_20122417_ccs	1	5004	4933	Val	AAC	0	0	-29.74
m64111_201213_171552_20122431_ccs	1	8098	8028	Ala	AGC	0	0	-26.12
m64111_201213_171552_20187761_ccs	1	323	251	Gly	TCC	0	0	-31.23
m64111_201213_171552_20317836_ccs	1	1928	2000	Ser	GCT	0	0	-28.26
m64111_201213_171552_20317836_ccs	2	9750	9678	Ser	GCT	0	0	-28.26
m64111_201213_171552_20841607_ccs0	1	2222	2150	Ala	AGC	0	0	-27.79
m64111_201213_171552_20841607_ccs01	1	1917	1845	Ala	AGC	0	0	-27.79
m64111_201213_171552_21365862_ccs	1	1139	1212	Ala	GGC	0	0	-31.66
m64111_201213_171552_21824241_ccs	1	5230	5303	Ala	GGC	0	0	-27.63
m64111_201213_171552_21825617_ccs	1	68	141	Asn	GTT	0	0	-31.53
m64111_201213_171552_22022421_ccs	1	1063	1135	Asn	GTT	0	0	-28.26
m64111_201213_171552_22087488_ccs	1	314	386	Ser	GCT	0	0	-31.03
m64111_201213_171552_22350167_ccs	1	6273	6345	Ile	GAT	0	0	-22.86
m64111_201213_171552_86968804_ccs	1	7656	7727	Asn	ATT	0	0	-24.58
m64111_201213_171552_23789751_ccs	1	4084	4012	Ser	GCT	0	0	-28.26
m64111_201213_171552_23921976_ccs	1	572	501	Ala	TGC	0	0	-26.38
m64111_201213_171552_24184213_ccs	1	18631	18706	Asp	GTC	0	0	-31
m64111_201213_171552_24184213_ccs	2	1856	1784	Arg	CCT	0	0	-26.44
m64111_201213_171552_24773394_ccs	1	6297	6225	Asp	GTC	0	0	-30.88
m64111_201213_171552_24840455_ccs000	1	186	258	Ser	GCT	0	0	-26.69
m64111_201213_171552_25823808_ccs	1	5246	5174	Ser	GCT	0	0	-28.32
m64111_201213_171552_25889489_ccs	1	2458	2530	Met	CAT	0	0	-31.75
m64111_201213_171552_25889489_ccs	2	5870	5799	Gly	GCC	0	0	-30.45
m64111_201213_171552_26673357_ccs	1	126	53	Val	CAC	0	0	-26.5
m64111_201213_171552_26937102_ccs	1	698	770	Ser	GCT	0	0	-28.26
m64111_201213_171552_26937102_ccs	2	3617	3545	Gly	TCC	0	0	-25.75
m64111_201213_171552_26937102_ccs	3	1789	1717	Asn	GTT	0	0	-26.65
m64111_201213_171552_28444144_ccs	1	6298	6228	Thr	AGT	0	0	-25.28
m64111_201213_171552_28510555_ccs	1	3407	3330	Lys	CTT	0	0	-27.03
m64111_201213_171552_28966991_ccs	1	2782	2709	Tyr	ATA	0	0	-31.76
m64111_201213_171552_29229338_ccs	1	250	179	Ala	AGC	0	0	-26.16
m64111_201213_171552_29559431_ccs	1	20	96	Lys	CTT	0	0	-30.28
m64111_201213_171552_87557330_ccs	1	1585	1657	Cys	GCA	0	0	-29.57
m64111_201213_171552_87688506_ccs	1	1110	1182	Ser	GCT	0	0	-28.26
m64111_201213_171552_87753200_ccs	1	797	868	Ser	TGA	0	0	-28.11
m64111_201213_171552_30017050_ccs0	1	1367	1439	His	GTG	0	0	-30.19
m64111_201213_171552_30409623_ccs0	1	794	722	Glu	CTC	0	0	-30.61
m64111_201213_171552_30409623_ccs01	1	1242	1170	Glu	CTC	0	0	-30.61
m64111_201213_171552_30411169_ccs	1	3021	2949	Ser	GCT	0	0	-28.76
m64111_201213_171552_30606924_ccs	1	7741	7671	Ser	TGA	0	0	-29.73
m64111_201213_171552_30999543_ccs	1	7436	7508	Lys	CTT	0	0	-25.04
m64111_201213_171552_30999543_ccs	2	12370	12442	Ser	GCT	0	0	-28.26
m64111_201213_171552_31129630_ccs	1	2813	2742	Gly	TCC	0	0	-28.52
m64111_201213_171552_31327758_ccs	1	3655	3727	Ala	TGC	0	0	-31.66
m64111_201213_171552_31588854_ccs	1	8631	8560	Met	CAT	0	0	-24.74
m64111_201213_171552_31588854_ccs	2	7425	7353	Ser	GCT	0	0	-26.14
m64111_201213_171552_31785315_ccs	1	1344	1273	Ser	GCT	0	0	-25.34
m64111_201213_171552_32638740_ccs	1	4306	4382	Asn	GTT	0	0	-30.73
m64111_201213_171552_55707749_ccs	1	1209	1281	Val	CAC	0	0	-30.25
m64111_201213_171552_55772002_ccs	1	8299	8371	Ser	GCT	0	0	-26.65
m64111_201213_171552_55836692_ccs0	1	365	293	Ser	GCT	0	0	-28.26
m64111_201213_171552_55836692_ccs010	1	749	677	Ser	GCT	0	0	-28.26
m64111_201213_171552_55836692_ccs0101	1	482	410	Ser	GCT	0	0	-28.26
m64111_201213_171552_87951781_ccs	1	7592	7663	Ala	AGC	0	0	-27.54
m64111_201213_171552_88081157_ccs	1	2087	2015	Lys	CTT	0	0	-28.37
m64111_201213_171552_33557110_ccs01	1	96	25	Leu	CAG	0	0	-27.06
m64111_201213_171552_34275588_ccs	1	1567	1495	Ser	GCT	0	0	-29.38
m64111_201213_171552_34604598_ccs	1	1259	1187	Ser	GCT	0	0	-26.14
m64111_201213_171552_34605727_ccs	1	4188	4114	Ala	AGC	0	0	-24.23
m64111_201213_171552_35193491_ccs	1	102	20	Ala	TGC	0	0	-30.05
m64111_201213_171552_35260373_ccs	1	3357	3429	Ile	AAT	0	0	-29.54
m64111_201213_171552_36570416_ccs	1	429	500	Ala	AGC	0	0	-31.37
m64111_201213_171552_36634653_ccs	1	1785	1855	Gln	TTG	0	0	-29.06
m64111_201213_171552_55903922_ccs	1	3007	2935	Asn	GTT	0	0	-27.57
m64111_201213_171552_55969300_ccs	1	546	474	Asn	GTT	0	0	-28.26
m64111_201213_171552_56165165_ccs0	1	822	750	Tyr	ATA	0	0	-28.86
m64111_201213_171552_56165165_ccs01	1	514	442	Tyr	ATA	0	0	-28.86
m64111_201213_171552_37292013_ccs	1	4410	4338	Asn	GTT	0	0	-28.26
m64111_201213_171552_37619028_ccs	1	3313	3241	Ser	GCT	0	0	-28.26
m64111_201213_171552_37749070_ccs	1	4447	4375	Ser	GCT	0	0	-31.14
m64111_201213_171552_37816225_ccs	1	1491	1563	Gly	TCC	0	0	-25.93
m64111_201213_171552_38144579_ccs	1	5104	5176	Ser	GCT	0	0	-28.26
m64111_201213_171552_38667730_ccs	1	2285	2360	Tyr	GTA	0	0	-30.46
m64111_201213_171552_38668984_ccs0	1	416	488	Ser	GCT	0	0	-29.25
m64111_201213_171552_38669111_ccs	1	2969	3040	Thr	AGT	0	0	-25.9
m64111_201213_171552_38798339_ccs	1	2571	2500	Trp	AAA	0	0	-25.82
m64111_201213_171552_38865325_ccs	1	1676	1748	Asn	GTT	0	0	-31.73
m64111_201213_171552_38995391_ccs01	1	4841	4914	Gly	TCC	0	0	-30.98
m64111_201213_171552_38995391_ccs01	2	3935	3862	Ser	GCT	0	0	-28.48
m64111_201213_171552_39060521_ccs	1	1331	1403	Lys	CTT	0	0	-28.95
m64111_201213_171552_39782247_ccs	1	4323	4395	Ser	GCT	0	0	-28.31
m64111_201213_171552_39912382_ccs	1	2239	2310	Val	AAC	0	0	-24.68
m64111_201213_171552_39912382_ccs	2	4481	4553	Lys	CTT	0	0	-27.79
m64111_201213_171552_88737325_ccs	1	7878	7806	Ser	GCT	0	0	-28.43
m64111_201213_171552_88868474_ccs0	1	531	603	Ser	GCT	0	0	-28.26
m64111_201213_171552_88868474_ccs01	1	1022	1094	Ser	GCT	0	0	-23.37
m64111_201213_171552_88868592_ccs0	1	632	704	Gln	CTG	0	0	-25.04
m64111_201213_171552_41093979_ccs01	1	185	257	Ser	GCT	0	0	-24.28
m64111_201213_171552_41156681_ccs	1	1646	1720	Ser	GCT	0	0	-29.61
m64111_201213_171552_41156681_ccs	2	3204	3276	Ser	GCT	0	0	-28.3
m64111_201213_171552_41156681_ccs	3	4385	4457	Ser	GCT	0	0	-30.83
m64111_201213_171552_41156681_ccs	4	7523	7594	Trp	CCA	0	0	-25.21
m64111_201213_171552_41156681_ccs	5	914	842	Ser	GCT	0	0	-28.26
m64111_201213_171552_41615373_ccs	1	812	884	Glu	CTC	0	0	-24.27
m64111_201213_171552_41748177_ccs	1	580	508	Gly	TCC	0	0	-28.36
m64111_201213_171552_41814838_ccs	1	2987	3060	Lys	CTT	0	0	-31.12
m64111_201213_171552_41814838_ccs	2	4170	4100	Ser	AGA	0	0	-24.13
m64111_201213_171552_42076379_ccs	1	946	1019	Ile	AAT	0	0	-30.39
m64111_201213_171552_42468841_ccs	1	1476	1548	Gly	TCC	0	0	-29.31
m64111_201213_171552_42665600_ccs	1	5651	5723	Arg	TCT	0	0	-28.26
m64111_201213_171552_42666219_ccs	1	3698	3770	Gly	TCC	0	0	-30.51
m64111_201213_171552_43385694_ccs	1	6129	6058	Ala	TGC	0	0	-30.96
m64111_201213_171552_43648651_ccs0101	1	744	815	Gly	GCC	0	0	-31.56
m64111_201213_171552_43778317_ccs	1	3960	4030	Gly	TCC	0	0	-31.79
m64111_201213_171552_918169_ccs	1	4382	4310	Ser	GCT	0	0	-28.82
m64111_201213_171552_56885741_ccs	1	3575	3649	Gln	TTG	0	0	-19.22
m64111_201213_171552_4128779_ccs	1	3159	3231	Ser	GCT	0	0	-25.04
m64111_201213_171552_4129877_ccs	1	304	232	Asn	GTT	0	0	-28.44
m64111_201213_171552_76350846_ccs	1	3253	3325	Val	AAC	0	0	-30.46
m64111_201213_171552_76480715_ccs	1	1296	1224	Asn	ATT	0	0	-29.65
m64111_201213_171552_58589436_ccs	1	4845	4773	Ser	GCT	0	0	-24.49
m64111_201213_171552_59113508_ccs	1	3551	3623	Ser	ACT	0	0	-28.77
m64111_201213_171552_3736743_ccs	1	4146	4218	Gly	TCC	0	0	-29.39
m64111_201213_171552_3868068_ccs	1	880	952	Asn	GTT	0	0	-28.8
m64111_201213_171552_60752818_ccs	1	2545	2616	Gln	CTG	0	0	-30.71
m64111_201213_171552_60753486_ccs	1	8641	8713	Lys	CTT	0	0	-28.1
m64111_201213_171552_60753486_ccs	2	6450	6378	Gly	CCC	0	0	-23.32
m64111_201213_171552_60885752_ccs0	1	207	137	***	TCA	0	0	-22.22
m64111_201213_171552_60885752_ccs01	1	776	706	***	TCA	0	0	-22.22
m64111_201213_171552_61014462_ccs	1	848	920	Gly	TCC	0	0	-29.02
m64111_201213_171552_61014600_ccs	1	1497	1579	Pro	AGG	0	0	-31.4
m64111_201213_171552_61014600_ccs	2	2023	2095	Ser	GCT	0	0	-28.26
m64111_201213_171552_61277261_ccs	1	416	344	Ser	GCT	0	0	-28.26
m64111_201213_171552_61473923_ccs00	1	364	435	Trp	CCA	0	0	-28.8
m64111_201213_171552_61735577_ccs	1	2137	2065	Ser	GCT	0	0	-27.08
m64111_201213_171552_62260323_ccs	1	8052	7981	Cys	GCA	0	0	-29.18
m64111_201213_171552_62260323_ccs	2	7576	7504	Ser	ACT	0	0	-31.54
m64111_201213_171552_62260323_ccs	3	3008	2936	Ala	AGC	0	0	-29.94
m64111_201213_171552_62260323_ccs	4	611	539	Asn	GTT	0	0	-26.65
m64111_201213_171552_62914943_ccs	1	1741	1669	Glu	CTC	0	0	-30.19
m64111_201213_171552_62916075_ccs	1	2049	2120	Val	CAC	0	0	-25.67
m64111_201213_171552_63374888_ccs	1	450	522	Ser	GCT	0	0	-28.26
m64111_201213_171552_63703166_ccs	1	21	93	Ser	GCT	0	0	-28.26
m64111_201213_171552_63898596_ccs	1	2654	2725	Val	TAC	0	0	-28.83
m64111_201213_171552_4458117_ccs	1	975	1045	Ala	AGC	0	0	-29.18
m64111_201213_171552_64947796_ccs	1	1024	952	Ser	GCT	0	0	-22.29
m64111_201213_171552_64947796_ccs	2	189	120	Asp	ATC	0	0	-26.48
m64111_201213_171552_65274824_ccs0	1	407	335	Thr	TGT	0	0	-30.84
m64111_201213_171552_65274824_ccs01	1	1241	1169	Thr	TGT	0	0	-30.84
m64111_201213_171552_66388303_ccs	1	15860	15790	Ser	TGA	0	0	-29.73
m64111_201213_171552_66388303_ccs	2	12763	12693	Gln	TTG	0	0	-29.06
m64111_201213_171552_67242791_ccs	1	6826	6898	Ser	GCT	0	0	-28.26
m64111_201213_171552_67504373_ccs	1	8056	8133	Lys	CTT	0	0	-27.03
m64111_201213_171552_67895857_ccs	1	2008	2079	Ser	GCT	0	0	-30.13
m64111_201213_171552_67895857_ccs	2	2646	2718	Asn	GTT	0	0	-25.04
m64111_201213_171552_1837232_ccs	1	5579	5507	Ser	ACT	0	0	-31.21
m64111_201213_171552_1837232_ccs	2	5345	5275	Arg	CCT	0	0	-28.95
m64111_201213_171552_69075414_ccs	1	2758	2830	Asn	GTT	0	0	-27.21
m64111_201213_171552_69403548_ccs	1	6676	6606	Ser	AGA	0	0	-31.78
m64111_201213_171552_70190598_ccs0	1	757	685	Ser	GCT	0	0	-30.86
m64111_201213_171552_70190598_ccs01	1	300	228	Ser	GCT	0	0	-30.86
m64111_201213_171552_70452003_ccs	1	1803	1731	Ser	GCT	0	0	-28.82
m64111_201213_171552_71369470_ccs	1	5677	5605	Gly	TCC	0	0	-30.06
m64111_201213_171552_71369470_ccs	2	5061	4990	Leu	TAG	0	0	-23.97
m64111_201213_171552_71565501_ccs0	1	149	221	Ser	GCT	0	0	-28.26
m64111_201213_171552_71631019_ccs	1	1266	1194	Ser	GCT	0	0	-25.04
m64111_201213_171552_2099006_ccs	1	2601	2529	Ser	GCT	0	0	-27.77
m64111_201213_171552_71764704_ccs	1	5030	5100	Ser	TGA	0	0	-29.73
m64111_201213_171552_71764704_ccs	2	9796	9726	Gln	TTG	0	0	-29.06
m64111_201213_171552_72878001_ccs	1	879	807	Gly	TCC	0	0	-27.02
m64111_201213_171552_73140081_ccs	1	3779	3851	Ser	GCT	0	0	-28.26
m64111_201213_171552_73598094_ccs	1	3559	3634	Thr	GGT	0	0	-23.31
m64111_201213_171552_74122550_ccs	1	7762	7690	Asn	GTT	0	0	-26.65
m64111_201213_171552_74122555_ccs	1	5151	5223	Ser	GCT	0	0	-28.21
m64111_201213_171552_75434532_ccs	1	4012	3939	Ala	TGC	0	0	-28.3
m64111_201213_171552_75497551_ccs	1	2399	2472	Cys	GCA	0	0	-26.33
m64111_201213_171552_5309338_ccs	1	669	597	Ser	GCT	0	0	-28.26
m64111_201213_171552_5636151_ccs00	1	265	193	Ser	GCT	0	0	-28.26
m64111_201213_171552_5636151_ccs010	1	311	239	Ser	GCT	0	0	-28.26
m64111_201213_171552_5899982_ccs	1	456	526	Arg	CCT	0	0	-29.64
m64111_201213_171552_5966479_ccs0	1	501	672	Tyr	GTA	0	0	-31.39
m64111_201213_171552_6226595_ccs	1	13709	13638	Ser	GCT	0	0	-28.37
m64111_201213_171552_6226595_ccs	2	10327	10255	Ser	GCT	0	0	-25.26
m64111_201213_171552_6291492_ccs	1	803	873	Ser	TGA	0	0	-29.73
m64111_201213_171552_6291492_ccs	2	10953	10883	Gln	TTG	0	0	-29.06
m64111_201213_171552_6489064_ccs	1	2579	2507	Arg	TCT	0	0	-29.15
m64111_201213_171552_76809869_ccs	1	5315	5243	Ser	GCT	0	0	-28.82
m64111_201213_171552_77005359_ccs01	1	1089	1019	Gly	ACC	0	0	-27.42
m64111_201213_171552_7472175_ccs	1	2232	2156	Glu	TTC	0	0	-26.09
m64111_201213_171552_4063420_ccs	1	78	1	Ala	GGC	0	0	-27.43
m64111_201213_171552_44105822_ccs	1	2985	2913	Ser	GCT	0	0	-28.26
m64111_201213_171552_7669344_ccs	1	1518	1446	Lys	TTT	0	0	-28.61
m64111_201213_171552_7669771_ccs	1	5206	5278	Lys	CTT	0	0	-25.16
m64111_201213_171552_7669771_ccs	2	5438	5510	Ser	GCT	0	0	-28.26
m64111_201213_171552_89587746_ccs	1	1130	1058	Ser	GCT	0	0	-27.54
m64111_201213_171552_89588476_ccs	1	1909	1981	Ile	GAT	0	0	-28.88
m64111_201213_171552_89721362_ccs	1	2337	2409	Ser	GCT	0	0	-29.66
m64111_201213_171552_89721362_ccs	2	6303	6375	Ser	GCT	0	0	-31.71
m64111_201213_171552_89786087_ccs0	1	7333	7405	Ser	GCT	0	0	-28.26
m64111_201213_171552_90179768_ccs	1	5891	5819	Ala	AGC	0	0	-31.11
m64111_201213_171552_90244647_ccs0	1	176	104	Ser	GCT	0	0	-19.58
m64111_201213_171552_90375198_ccs	1	3130	3202	Ser	ACT	0	0	-28.56
m64111_201213_171552_90834152_ccs	1	1073	1145	Lys	CTT	0	0	-29.33
m64111_201213_171552_91359221_ccs0	1	1095	1166	Ser	AGA	0	0	-28.82
m64111_201213_171552_91359221_ccs01	1	444	515	Ser	AGA	0	0	-28.82
m64111_201213_171552_91817642_ccs	1	7279	7207	Thr	TGT	0	0	-31.01
m64111_201213_171552_44238602_ccs	1	877	949	Ser	ACT	0	0	-28.26
m64111_201213_171552_44238602_ccs	2	3439	3511	Ser	GCT	0	0	-28.4
m64111_201213_171552_44369789_ccs	1	321	249	Ser	GCT	0	0	-29.63
m64111_201213_171552_92801118_ccs0	1	392	464	Ser	GCT	0	0	-28.43
m64111_201213_171552_92801118_ccs01	1	102	174	Ser	GCT	0	0	-28.43
m64111_201213_171552_93128954_ccs	1	661	733	Thr	GGT	0	0	-31.32
m64111_201213_171552_93718067_ccs0	1	311	239	Gly	TCC	0	0	-30.42
m64111_201213_171552_93718067_ccs01	1	194	122	Gly	TCC	0	0	-25.52
m64111_201213_171552_94109992_ccs	1	1700	1772	Gly	TCC	0	0	-26.91
m64111_201213_171552_94109992_ccs	2	3858	3786	Asn	GTT	0	0	-27.87
m64111_201213_171552_94437950_ccs	1	7588	7519	Ala	AGC	0	0	-26.49
m64111_201213_171552_94440115_ccs	1	5503	5575	Ser	GCT	0	0	-28.26
m64111_201213_171552_94832539_ccs	1	1671	1743	Thr	AGT	0	0	-28.5
m64111_201213_171552_95224612_ccs	1	4838	4766	Asp	ATC	0	0	-29.97
m64111_201213_171552_95749667_ccs	1	308	380	Ala	AGC	0	0	-26.7
m64111_201213_171552_44631145_ccs	1	840	917	Ser	GCT	0	0	-29.93
m64111_201213_171552_44631145_ccs	2	1086	1158	Ser	GCT	0	0	-27.57
m64111_201213_171552_44631145_ccs	3	3114	3186	Asn	GTT	0	0	-27.57
m64111_201213_171552_44631145_ccs	4	5744	5816	Ser	GCT	0	0	-17.97
m64111_201213_171552_44892368_ccs	1	2660	2732	Ser	GCT	0	0	-20.15
m64111_201213_171552_96272418_ccs00	1	271	343	Ser	ACT	0	0	-25.79
m64111_201213_171552_96404833_ccs	1	6885	6813	Ala	AGC	0	0	-23.91
m64111_201213_171552_96928541_ccs	1	317	389	Ser	GCT	0	0	-28.96
m64111_201213_171552_97126773_ccs0	1	229	304	Cys	GCA	0	0	-30.37
m64111_201213_171552_97126773_ccs010	1	47	122	Cys	GCA	0	0	-30.37
m64111_201213_171552_97126773_ccs010	2	376	446	Leu	TAG	0	0	-28.81
m64111_201213_171552_97323437_ccs	1	1969	1897	Ser	GCT	0	0	-26.06
m64111_201213_171552_97584068_ccs	1	193	121	Ile	GAT	0	0	-27.56
m64111_201213_171552_97584775_ccs	1	4125	4197	Ser	GCT	0	0	-28.26
m64111_201213_171552_97714377_ccs	1	5892	5964	Ser	GCT	0	0	-27.65
m64111_201213_171552_97714377_ccs	2	106	34	Ser	GCT	0	0	-23.37
m64111_201213_171552_98240153_ccs	1	4083	4012	Val	AAC	0	0	-30.18
m64111_201213_171552_98437884_ccs	1	5678	5747	Thr	AGT	0	0	-27.96
m64111_201213_171552_99026775_ccs	1	6736	6666	Ser	TGA	0	0	-29.73
m64111_201213_171552_99026775_ccs	2	3639	3569	Gln	TTG	0	0	-29.06
m64111_201213_171552_78054672_ccs	1	3277	3349	Ser	GCT	0	0	-28.95
m64111_201213_171552_78054672_ccs	2	6470	6543	Asn	GTT	0	0	-30.02
m64111_201213_171552_99617332_ccs	1	7166	7093	His	GTG	0	0	-29.44
m64111_201213_171552_99682831_ccs0	1	533	461	Gly	GCC	0	0	-28.26
m64111_201213_171552_99682831_ccs01	1	301	229	Gly	GCC	0	0	-28.26
m64111_201213_171552_99878124_ccs	1	1180	1250	Gln	TTG	0	0	-29.06
m64111_201213_171552_99878124_ccs	2	5379	5309	Ser	TGA	0	0	-29.73
m64111_201213_171552_101384405_ccs	1	8993	8921	Ser	GCT	0	0	-26.65
m64111_201213_171552_101384405_ccs	2	5725	5653	Ser	GCT	0	0	-30.65
m64111_201213_171552_101384405_ccs	3	5039	4967	Ser	GCT	0	0	-27.57
m64111_201213_171552_101450205_ccs	1	1638	1566	Asn	GTT	0	0	-28.26
m64111_201213_171552_101648476_ccs	1	2020	2091	His	GTG	0	0	-31.73
m64111_201213_171552_102304502_ccs	1	2834	2906	Ala	AGC	0	0	-22.93
m64111_201213_171552_102369343_ccs	1	9323	9399	Met	CAT	0	0	-30.53
m64111_201213_171552_102369343_ccs	2	9554	9626	Ser	GCT	0	0	-23.08
m64111_201213_171552_102565314_ccs	1	4920	4990	Ser	TGA	0	0	-29.73
m64111_201213_171552_102565314_ccs	2	10216	10146	Gln	TTG	0	0	-29.06
m64111_201213_171552_78185439_ccs	1	2402	2330	Ser	GCT	0	0	-31.54
m64111_201213_171552_78382745_ccs	1	1091	1163	Ser	GCT	0	0	-28.31
m64111_201213_171552_78382745_ccs	2	3235	3163	Lys	CTT	0	0	-28.26
m64111_201213_171552_45419338_ccs0	1	382	310	Lys	CTT	0	0	-21.07
m64111_201213_171552_45419338_ccs01	1	276	204	Lys	CTT	0	0	-20.51
m64111_201213_171552_45547908_ccs	1	6182	6254	Ser	GCT	0	0	-30.48
m64111_201213_171552_45549374_ccs01	1	1260	1332	Ala	GGC	0	0	-30.28
m64111_201213_171552_104137417_ccs	1	1582	1512	Cys	GCA	0	0	-31.34
m64111_201213_171552_104792276_ccs	1	730	802	Ile	TAT	0	0	-28.77
m64111_201213_171552_104792276_ccs	2	3923	3990	Ser	GCT	0	0	-23.37
m64111_201213_171552_104792276_ccs	3	3273	3201	Ser	GCT	0	0	-28.52
m64111_201213_171552_104924571_ccs	1	1924	1995	Ala	AGC	0	0	-31.48
m64111_201213_171552_104924571_ccs	2	3932	4004	Ser	GCT	0	0	-31.03
m64111_201213_171552_105644620_ccs	1	1934	2037	Val	TAC	0	0	-24.94
m64111_201213_171552_106170117_ccs	1	462	390	Asn	GTT	0	0	-28.26
m64111_201213_171552_106365627_ccs0	1	13	91	Ser	GCT	0	0	-30.72
m64111_201213_171552_106365627_ccs01	1	141	219	Ser	GCT	0	0	-31.27
m64111_201213_171552_106497148_ccs	1	6269	6341	Lys	TTT	0	0	-23.39
m64111_201213_171552_45482175_ccs	1	10010	10079	Gly	CCC	0	0	-29.1
m64111_201213_171552_132843_ccs	1	3495	3567	Ser	GCT	0	0	-28.26
m64111_201213_171552_197075_ccs	1	3234	3306	Thr	TGT	0	0	-27
m64111_201213_171552_107610185_ccs	1	1231	1303	Asn	GTT	0	0	-30.46
m64111_201213_171552_107610185_ccs	2	5416	5344	Lys	CTT	0	0	-28.43
m64111_201213_171552_107610693_ccs	1	1436	1506	Ser	TGA	0	0	-29.73
m64111_201213_171552_107610693_ccs	2	4536	4606	Gln	TTG	0	0	-29.06
m64111_201213_171552_107742090_ccs	1	916	987	***	CTA	0	0	-28.43
m64111_201213_171552_107809140_ccs	1	2998	2926	Ala	AGC	0	0	-25.39
m64111_201213_171552_107940016_ccs	1	1117	1045	Ser	GCT	0	0	-28.26
m64111_201213_171552_108135909_ccs	1	7031	6959	Gln	CTG	0	0	-23.61
m64111_201213_171552_108135909_ccs	2	248	177	Ser	GCT	0	0	-22.78
m64111_201213_171552_108332842_ccs	1	2240	2312	Cys	GCA	0	0	-22.87
m64111_201213_171552_108396911_ccs	1	799	727	Lys	CTT	0	0	-26.16
m64111_201213_171552_108658698_ccs	1	180	108	Lys	CTT	0	0	-31.65
m64111_201213_171552_108921920_ccs	1	3829	3758	Ile	AAT	0	0	-27.78
m64111_201213_171552_109904819_ccs010	1	104	33	Val	AAC	0	0	-31.32
m64111_201213_171552_110036460_ccs	1	459	387	Ser	GCT	0	0	-28.26
m64111_201213_171552_110102802_ccs	1	2871	2941	Ser	TGA	0	0	-29.73
m64111_201213_171552_2556455_ccs	1	828	900	Asn	GTT	0	0	-29.82
m64111_201213_171552_110430371_ccs	1	8819	8749	Ser	TGA	0	0	-29.73
m64111_201213_171552_110691144_ccs	1	8769	8699	Ser	TGA	0	0	-29.73
m64111_201213_171552_110691144_ccs	2	5671	5601	Gln	TTG	0	0	-29.06
m64111_201213_171552_111215495_ccs0	1	320	248	Gln	TTG	0	0	-17.09
m64111_201213_171552_111215753_ccs	1	4820	4892	Asn	GTT	0	0	-25.04
m64111_201213_171552_111477734_ccs	1	386	458	Ser	GCT	0	0	-25.04
m64111_201213_171552_112527769_ccs	1	4177	4249	Ser	GCT	0	0	-27.91
m64111_201213_171552_112593530_ccs	1	4463	4394	Thr	TGT	0	0	-27.86
m64111_201213_171552_113052461_ccs	1	1047	1119	Ala	AGC	0	0	-28.85
m64111_201213_171552_113117891_ccs	1	2304	2232	Leu	GAG	0	0	-31.73
m64111_201213_171552_113378751_ccs	1	4743	4673	Gln	TTG	0	0	-29.06
m64111_201213_171552_113574602_ccs	1	4822	4894	Gly	TCC	0	0	-25.75
m64111_201213_171552_113836967_ccs	1	4132	4061	Val	AAC	0	0	-28.41
m64111_201213_171552_113836967_ccs	2	3310	3238	Asn	ATT	0	0	-28.56
m64111_201213_171552_113969524_ccs	1	4056	4128	Lys	CTT	0	0	-29.88
m64111_201213_171552_79169727_ccs	1	4874	4799	Lys	CTT	0	0	-28.49
m64111_201213_171552_79169999_ccs	1	2151	2079	Asn	GTT	0	0	-27.57
m64111_201213_171552_79233121_ccs	1	1407	1483	***	CTA	0	0	-30.07
m64111_201213_171552_79366682_ccs	1	2515	2587	Ser	GCT	0	0	-27.25
m64111_201213_171552_114363200_ccs	1	3006	3078	Asn	GTT	0	0	-25.73
m64111_201213_171552_114427808_ccs	1	5268	5196	Ala	AGC	0	0	-25.92
m64111_201213_171552_114688171_ccs	1	579	651	Ser	GCT	0	0	-28.26
m64111_201213_171552_114688171_ccs	2	6666	6591	Ser	GCT	0	0	-27.57
m64111_201213_171552_115475707_ccs	1	2265	2193	Ser	GCT	0	0	-28.48
m64111_201213_171552_115672073_ccs	1	4883	4811	Ser	GCT	0	0	-28.26
m64111_201213_171552_116065989_ccs	1	2358	2430	Ser	GCT	0	0	-28.26
m64111_201213_171552_116065989_ccs	2	2564	2636	Ser	GCT	0	0	-30.08
m64111_201213_171552_116065989_ccs	3	3073	3145	Ser	GCT	0	0	-26.65
m64111_201213_171552_116326914_ccs	1	338	408	Gln	TTG	0	0	-29.06
m64111_201213_171552_117310402_ccs	1	736	806	Gln	TTG	0	0	-29.06
m64111_201213_171552_117310402_ccs	2	12024	12094	Ser	TGA	0	0	-29.73
m64111_201213_171552_117506903_ccs	1	310	239	Thr	TGT	0	0	-31.55
m64111_201213_171552_79757320_ccs	1	5973	6045	Ser	GCT	0	0	-22.87
m64111_201213_171552_118097752_ccs	1	476	548	Ser	GCT	0	0	-30.89
m64111_201213_171552_118097752_ccs	2	2050	2122	Ser	GCT	0	0	-22.86
m64111_201213_171552_119080874_ccs	1	3105	3033	Ala	AGC	0	0	-30.33
m64111_201213_171552_119277153_ccs	1	420	492	Asn	GTT	0	0	-28.47
m64111_201213_171552_119277212_ccs	1	5641	5569	Ser	GCT	0	0	-27.27
m64111_201213_171552_119606016_ccs	1	1105	1177	Gly	ACC	0	0	-28.53
m64111_201213_171552_119867829_ccs	1	1528	1600	Asn	GTT	0	0	-31.22
m64111_201213_171552_119867829_ccs	2	2165	2093	Thr	TGT	0	0	-27.1
m64111_201213_171552_119932401_ccs	1	458	529	Lys	CTT	0	0	-31.08
m64111_201213_171552_120521331_ccs	1	7657	7729	Ser	GCT	0	0	-28.99
m64111_201213_171552_120718511_ccs	1	597	525	Ser	GCT	0	0	-23.12
m64111_201213_171552_120783764_ccs	1	1908	1836	Ala	TGC	0	0	-28.29
m64111_201213_171552_120849683_ccs	1	1759	1831	Ser	GCT	0	0	-28.26
m64111_201213_171552_121309944_ccs	1	3022	3093	Arg	TCT	0	0	-30.16
m64111_201213_171552_80153251_ccs	1	574	499	Gly	GCC	0	0	-29.74
m64111_201213_171552_122095102_ccs	1	6935	7007	Ser	GCT	0	0	-22.38
m64111_201213_171552_122224760_ccs	1	7227	7299	Gly	TCC	0	0	-31.19
m64111_201213_171552_46663347_ccs	1	1141	1070	Ala	GGC	0	0	-16.9
m64111_201213_171552_46729536_ccs	1	586	656	Gln	TTG	0	0	-29.06
m64111_201213_171552_46729536_ccs	2	10945	10875	Ser	TGA	0	0	-29.73
m64111_201213_171552_122619025_ccs	1	2326	2398	Ser	GCT	0	0	-28.26
m64111_201213_171552_122619025_ccs	2	6398	6327	Lys	CTT	0	0	-28.26
m64111_201213_171552_122948169_ccs	1	2443	2515	Ala	GGC	0	0	-31.62
m64111_201213_171552_123469882_ccs	1	3511	3439	Asn	GTT	0	0	-31.43
m64111_201213_171552_123734135_ccs	1	2303	2375	Ser	GCT	0	0	-30.48
m64111_201213_171552_123865059_ccs	1	177	106	Ala	GGC	0	0	-25.4
m64111_201213_171552_123930701_ccs	1	5036	5108	Arg	TCT	0	0	-29.19
m64111_201213_171552_123995953_ccs	1	10839	10767	Ser	GCT	0	0	-28.43
m64111_201213_171552_124127440_ccs	1	2387	2315	Lys	CTT	0	0	-30.61
m64111_201213_171552_124256308_ccs	1	411	483	Ser	GCT	0	0	-27.57
m64111_201213_171552_124455029_ccs	1	943	1015	Lys	CTT	0	0	-27.79
m64111_201213_171552_125305775_ccs	1	1923	1998	Gly	GCC	0	0	-29.74
m64111_201213_171552_125700848_ccs	1	2585	2513	Lys	CTT	0	0	-31.51
m64111_201213_171552_80544757_ccs	1	2648	2720	Ser	GCT	0	0	-28.26
m64111_201213_171552_80675940_ccs	1	736	808	Ser	GCT	0	0	-28.26
m64111_201213_171552_125896735_ccs	1	2711	2639	Ser	ACT	0	0	-25.3
m64111_201213_171552_126026353_ccs	1	7135	7063	Ser	GCT	0	0	-28.82
m64111_201213_171552_126026353_ccs	2	3894	3822	Ser	GCT	0	0	-30.95
m64111_201213_171552_47055740_ccs	1	337	265	***	TCA	0	0	-29.17
m64111_201213_171552_47057474_ccs	1	7987	7915	Gly	GCC	0	0	-30.48
m64111_201213_171552_47057596_ccs	1	5541	5612	Asp	ATC	0	0	-28.69
m64111_201213_171552_47253969_ccs	1	2745	2817	Asn	GTT	0	0	-30.22
m64111_201213_171552_126355326_ccs00	1	2157	2085	Ser	GCT	0	0	-28.43
m64111_201213_171552_127076897_ccs0	1	598	526	Asn	GTT	0	0	-22.86
m64111_201213_171552_127076897_ccs01	1	501	429	Asn	GTT	0	0	-22.86
m64111_201213_171552_127142429_ccs	1	2530	2600	Ala	AGC	0	0	-25.36
m64111_201213_171552_127142623_ccs	1	2629	2557	Ser	GCT	0	0	-28.26
m64111_201213_171552_127339156_ccs	1	2934	3006	Ser	GCT	0	0	-25.34
m64111_201213_171552_127403009_ccs	1	1646	1576	Val	AAC	0	0	-28.79
m64111_201213_171552_127467704_ccs	1	3034	3105	Ala	GGC	0	0	-27.39
m64111_201213_171552_127796064_ccs	1	5418	5348	Ser	TGA	0	0	-29.73
m64111_201213_171552_127928405_ccs	1	642	714	Ser	AGA	0	0	-30.27
m64111_201213_171552_128518316_ccs	1	8566	8638	Lys	CTT	0	0	-28.26
m64111_201213_171552_128518316_ccs	2	18231	18302	Gly	GCC	0	0	-31.01
m64111_201213_171552_128909929_ccs	1	5983	6055	Ser	GCT	0	0	-26.49
m64111_201213_171552_129436270_ccs	1	3497	3425	Thr	AGT	0	0	-23.57
m64111_201213_171552_129436270_ccs	2	3334	3262	Lys	CTT	0	0	-30.43
m64111_201213_171552_129565959_ccs	1	1922	1997	Ser	GCT	0	0	-27.57
m64111_201213_171552_129828957_ccs	1	5151	5081	Gln	TTG	0	0	-29.06
m64111_201213_171552_47710214_ccs	1	1314	1384	Ala	AGC	0	0	-29.24
m64111_201213_171552_130351992_ccs	1	1141	1213	Asn	GTT	0	0	-25.04
m64111_201213_171552_130416773_ccs	1	2557	2483	Lys	CTT	0	0	-30.11
m64111_201213_171552_130547731_ccs	1	228	156	Ser	GCT	0	0	-28.45
m64111_201213_171552_130744371_ccs	1	3037	3109	Lys	CTT	0	0	-30.41
m64111_201213_171552_131204260_ccs	1	5814	5886	Glu	CTC	0	0	-23.05
m64111_201213_171552_131664263_ccs	1	9423	9352	Ala	AGC	0	0	-29.01
m64111_201213_171552_131664263_ccs	2	5448	5376	Thr	GGT	0	0	-27.57
m64111_201213_171552_131794475_ccs	1	9081	9009	Ser	GCT	0	0	-27.99
m64111_201213_171552_132253364_ccs	1	3861	3789	Ser	GCT	0	0	-28.66
m64111_201213_171552_132253957_ccs	1	94	25	Lys	CTT	0	0	-31.49
m64111_201213_171552_132254435_ccs	1	1858	1930	Ser	GCT	0	0	-27.64
m64111_201213_171552_132450704_ccs	1	986	1058	Ser	GCT	0	0	-28.26
m64111_201213_171552_132582221_ccs	1	4628	4700	His	ATG	0	0	-26.29
m64111_201213_171552_132582221_ccs	2	4763	4836	Ser	GCT	0	0	-28.26
m64111_201213_171552_132975281_ccs	1	4032	3960	Asn	ATT	0	0	-28.26
m64111_201213_171552_133302400_ccs	1	14595	14523	Ser	GCT	0	0	-23.81
m64111_201213_171552_133366373_ccs	1	5771	5699	Asn	ATT	0	0	-28.26
m64111_201213_171552_81331697_ccs	1	597	525	Ile	GAT	0	0	-22.12
m64111_201213_171552_133890486_ccs	1	3941	3869	Ser	GCT	0	0	-25.29
m64111_201213_171552_134087533_ccs	1	1396	1467	Ser	GCT	0	0	-31.8
m64111_201213_171552_134087533_ccs	2	9116	9046	Tyr	ATA	0	0	-31.66
m64111_201213_171552_134153485_ccs	1	1775	1848	Cys	GCA	0	0	-30.89
m64111_201213_171552_134219478_ccs	1	1269	1197	Thr	GGT	0	0	-26.49
m64111_201213_171552_134351700_ccs	1	2998	3070	Ser	GCT	0	0	-30.48
m64111_201213_171552_8455679_ccs	1	319	391	Cys	ACA	0	0	-27.94
m64111_201213_171552_9111779_ccs	1	1168	1239	Asp	ATC	0	0	-30.7
m64111_201213_171552_9568801_ccs	1	5263	5335	Ser	GCT	0	0	-28.26
m64111_201213_171552_9766045_ccs	1	2826	2754	Ser	GCT	0	0	-26.03
m64111_201213_171552_9766804_ccs	1	2459	2387	Ser	GCT	0	0	-28.26
m64111_201213_171552_9766842_ccs	1	9840	9768	Ser	ACT	0	0	-26.95
m64111_201213_171552_9896600_ccs	1	2000	2072	Asn	GTT	0	0	-30.04
m64111_201213_171552_9896600_ccs	2	3920	3848	Ser	GCT	0	0	-31.57
m64111_201213_171552_10223954_ccs	1	607	679	Ser	GCT	0	0	-26.51
m64111_201213_171552_10290423_ccs	1	5227	5155	Ser	GCT	0	0	-26.18
m64111_201213_171552_10945264_ccs	1	3235	3163	Lys	TTT	0	0	-30.7
m64111_201213_171552_48237131_ccs	1	3663	3590	Lys	CTT	0	0	-30.08
m64111_201213_171552_48301413_ccs	1	2144	2075	Val	CAC	0	0	-30.91
m64111_201213_171552_11930402_ccs	1	1314	1384	Ser	TGA	0	0	-29.73
m64111_201213_171552_12192226_ccs	1	6591	6663	Ala	AGC	0	0	-27.79
m64111_201213_171552_12453412_ccs	1	1578	1506	Lys	CTT	0	0	-28.26
m64111_201213_171552_12453412_ccs	2	712	640	Ser	GCT	0	0	-30.38
m64111_201213_171552_12518670_ccs	1	2030	2102	Ser	GCT	0	0	-28.26
m64111_201213_171552_134613052_ccs	1	4981	5054	Ser	GCT	0	0	-27.36
m64111_201213_171552_134809305_ccs	1	4370	4442	Asn	GTT	0	0	-28.3
m64111_201213_171552_134874360_ccs	1	8987	8917	Ser	TGA	0	0	-29.73
m64111_201213_171552_134874360_ccs	2	5888	5818	Gln	TTG	0	0	-29.06
m64111_201213_171552_135266610_ccs	1	7558	7486	Gly	GCC	0	0	-31.37
m64111_201213_171552_135791154_ccs	1	837	909	Ser	GCT	0	0	-28.26
m64111_201213_171552_135857576_ccs	1	3347	3419	Ser	GCT	0	0	-28.26
m64111_201213_171552_135988703_ccs	1	1905	1832	Lys	CTT	0	0	-31.51
m64111_201213_171552_136185363_ccs	1	2671	2743	Ser	GCT	0	0	-28.26
m64111_201213_171552_136250540_ccs	1	5920	5992	Ile	TAT	0	0	-28.66
m64111_201213_171552_48695453_ccs	1	3279	3350	Gly	TCC	0	0	-29.15
m64111_201213_171552_48695453_ccs	2	5472	5543	Gly	TCC	0	0	-28.25
m64111_201213_171552_136971341_ccs	1	3184	3112	Ser	ACT	0	0	-22.86
m64111_201213_171552_137167793_ccs	1	213	286	Gly	GCC	0	0	-24.4
m64111_201213_171552_137561224_ccs	1	3532	3604	Lys	CTT	0	0	-28.31
m64111_201213_171552_137758877_ccs	1	2510	2582	Ser	GCT	0	0	-28.52
m64111_201213_171552_138020464_ccs	1	2575	2646	Gly	TCC	0	0	-21.81
m64111_201213_171552_138020464_ccs	2	2764	2836	Asn	ATT	0	0	-30.48
m64111_201213_171552_138216188_ccs	1	2493	2564	Ser	TGA	0	0	-29.73
m64111_201213_171552_138216373_ccs0	1	521	449	Cys	GCA	0	0	-31.07
m64111_201213_171552_138216373_ccs010	1	1070	998	Cys	GCA	0	0	-31.07
m64111_201213_171552_138873279_ccs	1	3562	3490	Ser	GCT	0	0	-21.63
m64111_201213_171552_139067799_ccs	1	1274	1204	Gly	ACC	0	0	-30.39
m64111_201213_171552_139986326_ccs	1	5782	5852	Thr	AGT	0	0	-26.17
m64111_201213_171552_140116369_ccs	1	2862	2790	Ala	AGC	0	0	-31.43
m64111_201213_171552_140116862_ccs	1	4925	4853	Ala	AGC	0	0	-31.24
m64111_201213_171552_140182867_ccs	1	2073	2144	Arg	TCT	0	0	-27.35
m64111_201213_171552_82314698_ccs	1	3435	3363	Ser	GCT	0	0	-27.52
m64111_201213_171552_82380589_ccs	1	544	616	Gln	CTG	0	0	-23.84
m64111_201213_171552_82510048_ccs	1	2008	2080	Arg	CCT	0	0	-26.64
m64111_201213_171552_75629113_ccs	1	3850	3922	Ser	GCT	0	0	-22.38
m64111_201213_171552_75629113_ccs	2	2634	2562	Asn	GTT	0	0	-28.26
m64111_201213_171552_75629506_ccs	1	4290	4209	Ser	GCT	0	0	-15.13
m64111_201213_171552_75759924_ccs	1	1031	1102	Ser	GCT	0	0	-31.04
m64111_201213_171552_75759924_ccs	2	4094	4166	Ser	GCT	0	0	-30.47
m64111_201213_171552_140312828_ccs	1	3162	3234	Asn	GTT	0	0	-28.3
m64111_201213_171552_140312828_ccs	2	11210	11286	Asp	GTC	0	0	-22.29
m64111_201213_171552_140445895_ccs	1	2365	2436	Asp	ATC	0	0	-29.15
m64111_201213_171552_263791_ccs	1	4386	4457	Gly	GCC	0	0	-28.92
m64111_201213_171552_140903014_ccs	1	260	188	Ser	GCT	0	0	-28.26
m64111_201213_171552_140905212_ccs	1	150	222	Asn	GTT	0	0	-27.77
m64111_201213_171552_141166517_ccs	1	350	278	Ser	GCT	0	0	-27.57
m64111_201213_171552_141820459_ccs	1	4842	4912	Ile	TAT	0	0	-29.97
m64111_201213_171552_142214559_ccs	1	5319	5391	His	GTG	0	0	-29.39
m64111_201213_171552_142412595_ccs	1	1093	1165	Lys	CTT	0	0	-31.71
m64111_201213_171552_142476476_ccs0	1	5440	5512	Ser	GCT	0	0	-25.25
m64111_201213_171552_142476476_ccs0	2	5116	5044	Ser	GCT	0	0	-28.57
m64111_201213_171552_142476476_ccs0	3	4901	4829	Ser	GCT	0	0	-25.04
m64111_201213_171552_142476476_ccs0	4	4363	4291	Thr	AGT	0	0	-25.14
m64111_201213_171552_142870665_ccs	1	756	828	Ser	GCT	0	0	-28.26
m64111_201213_171552_143000310_ccs	1	12495	12425	Ser	TGA	0	0	-29.73
m64111_201213_171552_143000310_ccs	2	9396	9326	Gln	TTG	0	0	-29.06
m64111_201213_171552_143198124_ccs	1	7539	7468	Val	AAC	0	0	-31.29
m64111_201213_171552_143198124_ccs	2	3154	3085	Val	AAC	0	0	-25.4
m64111_201213_171552_2818929_ccs	1	4613	4540	Ser	GCT	0	0	-29.71
m64111_201213_171552_2818929_ccs	2	3568	3496	Asn	GTT	0	0	-28.47
m64111_201213_171552_2818929_ccs	3	2072	2000	Ser	GCT	0	0	-28.26
m64111_201213_171552_143526456_ccs	1	3965	3893	Gly	TCC	0	0	-25.93
m64111_201213_171552_143852945_ccs	1	16067	15995	Ser	GCT	0	0	-29.25
m64111_201213_171552_49611458_ccs	1	7017	6946	Ser	GCT	0	0	-25.94
m64111_201213_171552_144573238_ccs	1	2328	2400	Ser	GCT	0	0	-26.09
m64111_201213_171552_145031937_ccs	1	79	151	Ser	GCT	0	0	-28.99
m64111_201213_171552_145294026_ccs0	1	294	366	***	CTA	0	0	-31.31
m64111_201213_171552_145294026_ccs01	1	158	230	***	CTA	0	0	-31.31
m64111_201213_171552_145359007_ccs	1	23	95	Ser	ACT	0	0	-28.26
m64111_201213_171552_145361739_ccs	1	1897	1969	Ser	GCT	0	0	-28.57
m64111_201213_171552_146278431_ccs	1	736	808	Arg	CCT	0	0	-25.45
m64111_201213_171552_146670552_ccs	1	1313	1241	Ser	GCT	0	0	-28.26
m64111_201213_171552_146802286_ccs	1	4344	4416	Ser	GCT	0	0	-29.77
m64111_201213_171552_147786259_ccs	1	4766	4837	Leu	TAA	0	0	-25.44
m64111_201213_171552_148244214_ccs	1	2388	2316	Lys	CTT	0	0	-28.47
m64111_201213_171552_49743438_ccs	1	3723	3795	Asn	GTT	0	0	-18.18
m64111_201213_171552_148440230_ccs	1	1288	1360	Ser	GCT	0	0	-28.26
m64111_201213_171552_148636158_ccs	1	224	152	Ser	GCT	0	0	-25.04
m64111_201213_171552_148637750_ccs	1	1279	1207	Asn	GTT	0	0	-27.46
m64111_201213_171552_148768255_ccs	1	5444	5516	Lys	CTT	0	0	-28.21
m64111_201213_171552_149031211_ccs	1	2164	2236	Ser	GCT	0	0	-28.43
m64111_201213_171552_149291900_ccs	1	44	113	Ala	AGC	0	0	-30.38
m64111_201213_171552_149489489_ccs	1	5490	5562	His	GTG	0	0	-30.57
m64111_201213_171552_149555873_ccs	1	1131	1201	Gln	TTG	0	0	-29.06
m64111_201213_171552_149686328_ccs	1	11036	10964	Ser	GCT	0	0	-29.2
m64111_201213_171552_149881966_ccs	1	99	171	Arg	TCT	0	0	-30.71
m64111_201213_171552_149947064_ccs	1	2397	2325	Asn	GTT	0	0	-28.95
m64111_201213_171552_150012116_ccs	1	4362	4289	Lys	TTT	0	0	-28.1
m64111_201213_171552_150276816_ccs	1	3348	3420	Ser	GCT	0	0	-28.56
m64111_201213_171552_150407662_ccs	1	8317	8245	Asn	GTT	0	0	-26.65
m64111_201213_171552_150407662_ccs	2	945	873	Asn	GTT	0	0	-28.26
m64111_201213_171552_150536468_ccs	1	2994	3066	Ser	GCT	0	0	-31.13
m64111_201213_171552_150667434_ccs	1	4306	4383	Ser	GCT	0	0	-29.63
m64111_201213_171552_150667434_ccs	2	6510	6582	Ser	GCT	0	0	-26.06
m64111_201213_171552_150667434_ccs	3	3320	3248	Thr	AGT	0	0	-31.18
m64111_201213_171552_150734748_ccs	1	2702	2775	Asn	GTT	0	0	-30.54
m64111_201213_171552_150734965_ccs	1	3740	3811	Thr	GGT	0	0	-31.27
m64111_201213_171552_150799500_ccs	1	9990	9918	Ser	GCT	0	0	-24.45
m64111_201213_171552_150931013_ccs	1	665	737	Asn	GTT	0	0	-26.65
m64111_201213_171552_83362432_ccs	1	467	538	Gly	ACC	0	0	-21.08
m64111_201213_171552_151585869_ccs	1	1534	1605	Gly	TCC	0	0	-29.71
m64111_201213_171552_151783368_ccs	1	1459	1531	Ser	GCT	0	0	-28.48
m64111_201213_171552_151978719_ccs	1	1318	1390	Asn	GTT	0	0	-28.26
m64111_201213_171552_152240137_ccs	1	819	747	Ser	GCT	0	0	-28.31
m64111_201213_171552_50072261_ccs	1	1082	1010	Ser	GCT	0	0	-30.81
m64111_201213_171552_152307572_ccs	1	199	269	Gln	TTG	0	0	-29.06
m64111_201213_171552_152437492_ccs	1	893	822	Gly	GCC	0	0	-31.02
m64111_201213_171552_153157756_ccs	1	3742	3670	Asn	GTT	0	0	-28.45
m64111_201213_171552_153682196_ccs	1	1119	1190	Ala	AGC	0	0	-30.08
m64111_201213_171552_153683023_ccs	1	1399	1471	Ile	GAT	0	0	-23.02
m64111_201213_171552_154009628_ccs	1	7549	7621	Glu	CTC	0	0	-28.56
m64111_201213_171552_154206715_ccs	1	814	888	Ser	ACT	0	0	-31.71
m64111_201213_171552_154206715_ccs	2	2605	2533	Val	TAC	0	0	-30.47
m64111_201213_171552_154206715_ccs	3	2418	2346	Ser	ACT	0	0	-28.26
m64111_201213_171552_154207195_ccs	1	384	455	Asp	GTC	0	0	-22.62
m64111_201213_171552_154207195_ccs	2	3558	3631	Asn	GTT	0	0	-19.32
m64111_201213_171552_154208965_ccs	1	755	826	Trp	AAA	0	0	-25.82
m64111_201213_171552_154405199_ccs	1	6069	5997	Asn	GTT	0	0	-21.74
m64111_201213_171552_154732145_ccs	1	2965	3037	Ser	GCT	0	0	-28.26
m64111_201213_171552_154732145_ccs	2	5860	5932	Ser	GCT	0	0	-28.26
m64111_201213_171552_155061076_ccs	1	1428	1500	Asn	GTT	0	0	-28.26
m64111_201213_171552_83559467_ccs	1	4128	4058	Ala	AGC	0	0	-24.31
m64111_201213_171552_83887715_ccs	1	1599	1671	Ser	GCT	0	0	-30.41
m64111_201213_171552_155648651_ccs	1	2627	2557	Gln	TTG	0	0	-29.06
m64111_201213_171552_155846401_ccs	1	4140	4211	Lys	CTT	0	0	-28.14
m64111_201213_171552_155846401_ccs	2	339	267	Ser	GCT	0	0	-25.04
m64111_201213_171552_50528493_ccs	1	4192	4120	Thr	TGT	0	0	-28.45
m64111_201213_171552_156436496_ccs	1	7648	7719	Ser	ACT	0	0	-28.31
m64111_201213_171552_156436496_ccs	2	588	516	Ser	GCT	0	0	-26.81
m64111_201213_171552_157092051_ccs	1	5661	5732	Ala	AGC	0	0	-21.16
m64111_201213_171552_157353256_ccs	1	2423	2493	Gln	TTG	0	0	-29.06
m64111_201213_171552_157877345_ccs	1	8259	8184	Asn	GTT	0	0	-29.48
m64111_201213_171552_158599399_ccs	1	5190	5120	Thr	GGT	0	0	-29.44
m64111_201213_171552_84084857_ccs	1	1489	1559	Lys	CTT	0	0	-28.56
m64111_201213_171552_84149322_ccs	1	2221	2291	Ala	TGC	0	0	-26.67
m64111_201213_171552_159580601_ccs	1	1261	1333	Gln	CTG	0	0	-24.48
m64111_201213_171552_159580601_ccs	2	1748	1821	Ser	GCT	0	0	-28.26
m64111_201213_171552_159711650_ccs	1	192	120	Gly	TCC	0	0	-31.13
m64111_201213_171552_159713201_ccs	1	2397	2325	Ser	GCT	0	0	-26.65
m64111_201213_171552_159713548_ccs	1	14	86	Ser	GCT	0	0	-24.55
m64111_201213_171552_160563499_ccs	1	2653	2726	Lys	CTT	0	0	-28.26
m64111_201213_171552_160892593_ccs	1	5714	5642	Ser	GCT	0	0	-28.26
m64111_201213_171552_161218644_ccs0	1	187	115	Ser	ACT	0	0	-29.71
m64111_201213_171552_161218644_ccs01	1	71	1	Ser	ACT	0	0	-29.71
m64111_201213_171552_161352498_ccs0	1	2050	1979	Ser	GGA	0	0	-30.84
m64111_201213_171552_161416762_ccs	1	9144	9070	Ala	AGC	0	0	-30.22
m64111_201213_171552_162464655_ccs	1	4049	3977	Ser	ACT	0	0	-28.26
m64111_201213_171552_162465063_ccs	1	9513	9441	Asn	GTT	0	0	-30.47
m64111_201213_171552_84544326_ccs	1	3556	3628	Ser	GCT	0	0	-28.43
m64111_201213_171552_162728110_ccs	1	6542	6620	Ile	AAT	0	0	-30.55
m64111_201213_171552_162728110_ccs	2	6381	6310	Ala	AGC	0	0	-24.33
m64111_201213_171552_162728110_ccs	3	305	233	Ser	GCT	0	0	-30.91
m64111_201213_171552_163252888_ccs	1	4926	4998	Ala	AGC	0	0	-26.04
m64111_201213_171552_163252888_ccs	2	2516	2444	Ser	GCT	0	0	-22.08
m64111_201213_171552_163252888_ccs	3	74	1	Val	TAC	0	0	-31.54
m64111_201213_171552_163447548_ccs	1	1696	1772	Ser	GCT	0	0	-28.26
m64111_201213_171552_50988702_ccs	1	6355	6282	His	GTG	0	0	-29.61
m64111_201213_171552_163776641_ccs	1	10111	10041	Ser	TGA	0	0	-29.73
m64111_201213_171552_163776641_ccs	2	7013	6943	Gln	TTG	0	0	-29.06
m64111_201213_171552_164168423_ccs	1	997	925	Arg	TCT	0	0	-27.83
m64111_201213_171552_164299002_ccs	1	15741	15813	Ser	GCT	0	0	-29.66
m64111_201213_171552_164300069_ccs	1	698	768	Gln	TTG	0	0	-29.06
m64111_201213_171552_164300348_ccs	1	6580	6652	Asn	GTT	0	0	-24.26
m64111_201213_171552_164495535_ccs	1	5032	5111	Ser	GCT	0	0	-28.57
m64111_201213_171552_165283066_ccs0	1	11	84	Ser	GCT	0	0	-27.93
m64111_201213_171552_165743002_ccs	1	3453	3525	Lys	CTT	0	0	-28.61
m64111_201213_171552_84739580_ccs	1	4908	4835	Gly	TCC	0	0	-27.95
m64111_201213_171552_85067713_ccs	1	2899	2971	Lys	CTT	0	0	-27.82
m64111_201213_171552_85132564_ccs	1	154	83	***	TCA	0	0	-26.79
m64111_201213_171552_166397031_ccs	1	5753	5682	Val	AAC	0	0	-24.24
m64111_201213_171552_166986097_ccs	1	4893	4962	Arg	TCT	0	0	-31.79
m64111_201213_171552_166987234_ccs	1	8040	8112	Ser	GCT	0	0	-28.26
m64111_201213_171552_167445434_ccs	1	2588	2517	Ser	GCT	0	0	-28.04
m64111_201213_171552_168233491_ccs	1	2842	2770	Pro	TGG	0	0	-31.23
m64111_201213_171552_168495337_ccs	1	2899	2828	Gly	TCC	0	0	-28.41
m64111_201213_171552_170002310_ccs	1	11205	11133	Gly	TCC	0	0	-19.01
m64111_201213_171552_170002310_ccs	2	9721	9649	Ser	GCT	0	0	-28.26
m64111_201213_171552_170002310_ccs	3	4321	4249	Ser	GCT	0	0	-28.26
m64111_201213_171552_170002310_ccs	4	2811	2739	Ser	GCT	0	0	-31.58
m64111_201213_171552_170002310_ccs	5	2094	2022	Ser	GCT	0	0	-30.22
m64111_201213_171552_85329500_ccs	1	8167	8096	***	CTA	0	0	-30.08
m64111_201213_171552_85329500_ccs	2	2830	2760	Ser	GCT	0	0	-30.48
m64111_201213_171552_170525947_ccs	1	4683	4755	Asn	GTT	0	0	-28.82
m64111_201213_171552_170656721_ccs	1	1097	1167	Gln	TTG	0	0	-29.06
m64111_201213_171552_171507885_ccs	1	4441	4514	Lys	CTT	0	0	-25.92
m64111_201213_171552_171507885_ccs	2	6629	6557	Asn	GTT	0	0	-28.26
m64111_201213_171552_171507885_ccs	3	6249	6178	Ser	GCT	0	0	-28.26
m64111_201213_171552_171507885_ccs	4	6047	5975	Ser	GCT	0	0	-30.08
m64111_201213_171552_171507885_ccs	5	3050	2977	Ser	GCT	0	0	-25.04
m64111_201213_171552_51972641_ccs	1	192	263	Gly	TCC	0	0	-26.25
m64111_201213_171552_171639620_ccs	1	1321	1251	Ala	AGC	0	0	-30.49
m64111_201213_171552_172884462_ccs	1	2170	2240	Ser	TGA	0	0	-29.73
m64111_201213_171552_172950658_ccs	1	7036	6964	Asn	GTT	0	0	-28.86
m64111_201213_171552_173081265_ccs	1	1370	1442	Ser	GCT	0	0	-24.82
m64111_201213_171552_173279738_ccs	1	4587	4659	Asn	GTT	0	0	-23.37
m64111_201213_171552_173408645_ccs	1	888	816	***	TCA	0	0	-29.38
m64111_201213_171552_173475613_ccs	1	1904	1832	Ile	GAT	0	0	-28.26
m64111_201213_171552_173476316_ccs	1	4074	4002	Asn	GTT	0	0	-25.73
m64111_201213_171552_173607420_ccs	1	7686	7614	Ser	GCT	0	0	-30.22
m64111_201213_171552_173607420_ccs	2	5870	5798	Asn	GTT	0	0	-25.74
m64111_201213_171552_85657859_ccs	1	1797	1725	Ser	GCT	0	0	-28.26
m64111_201213_171552_85853162_ccs	1	2356	2428	Asp	GTC	0	0	-23.17
m64111_201213_171552_173999968_ccs	1	489	561	Ser	GCT	0	0	-28.26
m64111_201213_171552_174129887_ccs	1	4684	4614	Ser	TGA	0	0	-29.73
m64111_201213_171552_174129887_ccs	2	1585	1515	Gln	TTG	0	0	-29.06
m64111_201213_171552_174522584_ccs	1	9012	8940	Ser	GCT	0	0	-28.82
m64111_201213_171552_174589750_ccs	1	2484	2554	Gln	TTG	0	0	-29.06
m64111_201213_171552_174589750_ccs	2	5672	5602	Ser	TGA	0	0	-29.73
m64111_201213_171552_174654644_ccs	1	5163	5092	Val	AAC	0	0	-30.59
m64111_201213_171552_52364787_ccs	1	4162	4234	Ser	GCT	0	0	-27.57
m64111_201213_171552_175441049_ccs	1	3864	3936	Ser	ACT	0	0	-26.09
m64111_201213_171552_175441049_ccs	2	6136	6064	Ser	ACT	0	0	-30.29
m64111_201213_171552_176032134_ccs	1	8213	8141	Ser	GCT	0	0	-26.65
m64111_201213_171552_176032344_ccs	1	849	777	Lys	CTT	0	0	-23.75
m64111_201213_171552_176622254_ccs	1	6070	6141	Val	GAC	0	0	-26.97
m64111_201213_171552_176752829_ccs	1	5132	5060	Lys	CTT	0	0	-30.25
m64111_201213_171552_177144395_ccs	1	1953	2026	Ser	GCT	0	0	-28.26
m64111_201213_171552_177212029_ccs	1	181	109	Cys	ACA	0	0	-28.48
m64111_201213_171552_177342206_ccs	1	3003	2932	Lys	TTT	0	0	-30.47
m64111_201213_171552_85985338_ccs	1	8148	8076	Ser	GCT	0	0	-28.26
m64111_201213_171552_86049005_ccs	1	565	493	Asn	GTT	0	0	-26.65
m64111_201213_171552_86313605_ccs	1	6378	6306	Ser	GCT	0	0	-28.26
m64111_201213_171552_177473264_ccs	1	2054	2125	Lys	CTT	0	0	-31.71
m64111_201213_171552_177670140_ccs	1	5302	5374	Cys	GCA	0	0	-30.78
m64111_201213_171552_178063061_ccs	1	9004	9076	Gly	TCC	0	0	-22.16
m64111_201213_171552_178391606_ccs	1	6124	6053	***	CTA	0	0	-18.85
m64111_201213_171552_178980407_ccs	1	765	837	Ser	GCT	0	0	-28.26
m64111_201213_171552_178980407_ccs	2	2877	2805	Lys	TTT	0	0	-28.26
m64111_201213_171552_179504750_ccs	1	4336	4493	Thr	TGT	0	0	-31.12
m64111_201213_171552_179505693_ccs	1	586	514	Asn	GTT	0	0	-28.95
m64111_201213_171552_179569569_ccs	1	8998	9071	Lys	CTT	0	0	-28.26
m64111_201213_171552_179765263_ccs	1	3416	3344	Ser	GCT	0	0	-31.14
m64111_201213_171552_179833657_ccs	1	2503	2575	Ser	GCT	0	0	-28.34
m64111_201213_171552_179833657_ccs	2	4377	4305	Lys	CTT	0	0	-28.26
m64111_201213_171552_179898208_ccs	1	1640	1712	Ser	GCT	0	0	-27.77
m64111_201213_171552_179898208_ccs	2	3914	3986	Ser	GCT	0	0	-27.03
m64111_201213_171552_180095593_ccs	1	5426	5498	Ser	GCT	0	0	-22.86
m64111_201213_171552_180290533_ccs	1	2929	3001	Ser	GCT	0	0	-26.65
m64111_201213_171552_180421044_ccs	1	4668	4596	Ser	GCT	0	0	-30.57
m64111_201213_171552_180486732_ccs	1	5990	6062	Ser	AGA	0	0	-30.6
m64111_201213_171552_3148496_ccs	1	7754	7826	Ser	GCT	0	0	-24.55
m64111_201213_171552_3277233_ccs	1	1627	1699	Pro	GGG	0	0	-28.26
m64111_201213_171552_3277464_ccs	1	280	352	Ser	GCT	0	0	-26.06
m64111_201213_171552_12913426_ccs	1	3145	3074	Lys	CTT	0	0	-26.34
m64111_201213_171552_13041919_ccs	1	3322	3250	Asn	GTT	0	0	-28.26
m64111_201213_171552_13175432_ccs	1	1076	1004	Ser	GCT	0	0	-28.26
m64111_201213_171552_13305301_ccs	1	4559	4487	Ala	AGC	0	0	-29.59
m64111_201213_171552_13567049_ccs	1	3582	3510	Ile	GAT	0	0	-30.08
m64111_201213_171552_13634339_ccs	1	1498	1426	Ser	GCT	0	0	-28.43
m64111_201213_171552_14092511_ccs	1	5006	4934	Gln	CTG	0	0	-28.4
m64111_201213_171552_52889971_ccs	1	5684	5612	Ser	GCT	0	0	-28.26
m64111_201213_171552_14418390_ccs	1	2033	1961	Lys	CTT	0	0	-31.61
m64111_201213_171552_14681257_ccs	1	2701	2629	Asn	GTT	0	0	-28.26
m64111_201213_171552_14945020_ccs	1	2813	2885	Asn	GTT	0	0	-24.55
m64111_201213_171552_15991639_ccs	1	6030	5958	Ser	GCT	0	0	-31.32
m64111_201213_171552_16058550_ccs	1	6987	6917	Val	AAC	0	0	-31.27
m64111_201213_171552_16319803_ccs	1	8855	8783	Ser	GCT	0	0	-25.34
m64111_201213_171552_16319803_ccs	2	8196	8124	Asn	GTT	0	0	-27.57
m64111_201213_171552_86574758_ccs	1	4389	4320	Val	TAC	0	0	-30.85
m64111_201213_171552_86575274_ccs	1	6122	6050	Glu	CTC	0	0	-28.21
m64111_201213_171552_86706243_ccs	1	154	224	***	TCA	0	0	-22.1
m64111_201213_171552_16647121_ccs	1	2444	2519	Gly	ACC	0	0	-30.63
m64111_201213_171552_17236176_ccs	1	1934	1862	His	ATG	0	0	-28.06
m64111_201213_171552_17368153_ccs	1	366	294	Ser	GCT	0	0	-24.91
m64111_201213_171552_17631336_ccs0	1	304	376	Gln	TTG	0	0	-17.09
m64111_201213_171552_17631336_ccs01	1	135	207	Gln	TTG	0	0	-17.09
m64111_201213_171552_53348805_ccs	1	1845	1917	Ala	AGC	0	0	-25.44
m64111_201213_171552_18088007_ccs	1	1745	1824	Glu	CTC	0	0	-31.1
m64111_201213_171552_18417056_ccs	1	103	174	Tyr	ATA	0	0	-28.95
m64111_201213_171552_18483197_ccs	1	3514	3442	Ser	GCT	0	0	-27.64
m64111_201213_171552_18744767_ccs	1	6785	6857	Ser	GCT	0	0	-29.96
m64111_201213_171552_18876817_ccs	1	656	584	Ser	GCT	0	0	-25.04
m64111_201213_171552_19531266_ccs	1	430	358	Asn	GTT	0	0	-26.03
m64111_201213_171552_19595598_ccs	1	9206	9136	Ser	TGA	0	0	-29.73
m64111_201213_171552_19595598_ccs	2	6107	6037	Gln	TTG	0	0	-29.06
m64111_201213_171552_19793674_ccs	1	149	79	Lys	CTT	0	0	-29.49
m64111_201213_171552_19860087_ccs	1	4661	4733	Gly	GCC	0	0	-30.71
m64111_201213_171552_20185966_ccs	1	411	482	Ala	AGC	0	0	-24.21
m64111_201213_171552_86901389_ccs	1	6378	6449	Ala	AGC	0	0	-27.67
m64111_201213_171552_87034317_ccs	1	4796	4725	Val	TAC	0	0	-25.35
m64111_201213_171552_87099322_ccs	1	2931	2862	Ala	AGC	0	0	-26.66
m64111_201213_171552_87165254_ccs	1	1531	1603	Ser	GCT	0	0	-28.26
m64111_201213_171552_87165254_ccs	2	2745	2817	Asp	GTC	0	0	-31.66
m64111_201213_171552_20906717_ccs	1	45	117	His	GTG	0	0	-25.65
m64111_201213_171552_20907941_ccs	1	3964	4037	Ser	GGA	0	0	-31.56
m64111_201213_171552_20907941_ccs	2	6713	6782	Cys	GCA	0	0	-30.02
m64111_201213_171552_21364932_ccs	1	5934	6006	Gly	TCC	0	0	-27.2
m64111_201213_171552_21496956_ccs	1	2930	3003	His	GTG	0	0	-30.88
m64111_201213_171552_21563134_ccs	1	680	751	Ser	ACT	0	0	-29.71
m64111_201213_171552_21626935_ccs	1	5661	5589	Ser	GCT	0	0	-28.26
m64111_201213_171552_21628889_ccs	1	2580	2504	Ser	TGA	0	0	-30.83
m64111_201213_171552_22021450_ccs	1	7805	7735	Ser	TGA	0	0	-29.73
m64111_201213_171552_22021450_ccs	2	4704	4634	Gln	TTG	0	0	-29.06
m64111_201213_171552_22153081_ccs	1	5987	5915	Ser	GCT	0	0	-28.95
m64111_201213_171552_22348047_ccs	1	2762	2834	Asn	GTT	0	0	-28.26
m64111_201213_171552_22348047_ccs	2	4202	4132	Ser	GCT	0	0	-31.73
m64111_201213_171552_22415285_ccs	1	7008	6936	Ala	AGC	0	0	-25.87
m64111_201213_171552_22676236_ccs	1	9783	9855	Lys	CTT	0	0	-31.53
m64111_201213_171552_22676236_ccs	2	8642	8569	His	GTG	0	0	-30.69
m64111_201213_171552_22872476_ccs	1	3565	3637	Lys	CTT	0	0	-23.48
m64111_201213_171552_22873765_ccs	1	1585	1514	Gly	GCC	0	0	-30.29
m64111_201213_171552_87294224_ccs	1	3334	3406	Ala	GGC	0	0	-29
m64111_201213_171552_24182989_ccs	1	5937	5865	Ala	AGC	0	0	-27.13
m64111_201213_171552_24182989_ccs	2	2986	2915	Thr	GGT	0	0	-31.48
m64111_201213_171552_24182989_ccs	3	2116	2044	Lys	TTT	0	0	-29.67
m64111_201213_171552_24577885_ccs	1	1673	1745	Ser	GCT	0	0	-23.03
m64111_201213_171552_54329697_ccs	1	1240	1168	Ser	GCT	0	0	-27.3
m64111_201213_171552_25036213_ccs	1	2046	1974	Ser	GCT	0	0	-28.26
m64111_201213_171552_25232535_ccs	1	3467	3539	Asn	ATT	0	0	-25.04
m64111_201213_171552_25232535_ccs	2	10387	10316	Ser	GCT	0	0	-28.26
m64111_201213_171552_25298021_ccs	1	1036	1108	Lys	CTT	0	0	-30.49
m64111_201213_171552_25822018_ccs	1	8386	8314	Asn	ATT	0	0	-29.51
m64111_201213_171552_26149573_ccs	1	3989	4063	Ala	AGC	0	0	-31.35
m64111_201213_171552_26282792_ccs	1	2114	2185	Gly	TCC	0	0	-28.76
m64111_201213_171552_26413277_ccs	1	9342	9270	Gly	GCC	0	0	-25.21
m64111_201213_171552_26413277_ccs	2	1249	1177	Ser	GCT	0	0	-26.65
m64111_201213_171552_26543096_ccs	1	1438	1510	Ser	GCT	0	0	-29.61
m64111_201213_171552_26741568_ccs	1	11428	11358	Ser	TGA	0	0	-29.73
m64111_201213_171552_26741568_ccs	2	8330	8260	Gln	TTG	0	0	-29.06
m64111_201213_171552_27002804_ccs	1	836	908	Ser	GCT	0	0	-30.08
m64111_201213_171552_27002804_ccs	2	2185	2113	Ser	GCT	0	0	-28.26
m64111_201213_171552_27198571_ccs	1	3031	3103	Ser	GCT	0	0	-28.26
m64111_201213_171552_87754735_ccs	1	2641	2712	Ala	AGC	0	0	-30.83
m64111_201213_171552_27790064_ccs	1	957	884	Ser	GCT	0	0	-24.51
m64111_201213_171552_28247489_ccs	1	1384	1465	Leu	AAG	0	0	-29.63
m64111_201213_171552_28247489_ccs	2	6297	6225	Ser	GCT	0	0	-28.26
m64111_201213_171552_54462063_ccs	1	6345	6274	Gly	ACC	0	0	-26.78
m64111_201213_171552_28575012_ccs	1	8372	8300	Ser	ACT	0	0	-29.17
m64111_201213_171552_29492074_ccs	1	333	405	Ser	GCT	0	0	-31.43
m64111_201213_171552_29622376_ccs	1	1925	1853	Thr	AGT	0	0	-23.57
m64111_201213_171552_29622376_ccs	2	1762	1690	Lys	CTT	0	0	-30.43
m64111_201213_171552_30476441_ccs	1	7245	7315	Ser	TGA	0	0	-29.73
m64111_201213_171552_30476441_ccs	2	10353	10423	Gln	TTG	0	0	-29.06
m64111_201213_171552_30670873_ccs	1	1702	1781	Arg	TCT	0	0	-31.58
m64111_201213_171552_30670873_ccs	2	3711	3639	Gly	TCC	0	0	-25.93
m64111_201213_171552_30670995_ccs	1	9602	9530	Ser	GCT	0	0	-30.78
m64111_201213_171552_88081035_ccs	1	7151	7222	Ala	AGC	0	0	-31.26
m64111_201213_171552_88408307_ccs	1	6007	6079	Ser	GCT	0	0	-28.26
m64111_201213_171552_88408307_ccs	2	13109	13037	Ser	GCT	0	0	-28.26
m64111_201213_171552_31064191_ccs	1	5803	5732	Ile	TAT	0	0	-31
m64111_201213_171552_31654714_ccs	1	6546	6474	Asn	GTT	0	0	-27
m64111_201213_171552_32440981_ccs	1	2825	2897	Gly	TCC	0	0	-29.45
m64111_201213_171552_32443123_ccs	1	3358	3431	Asn	ATT	0	0	-31.07
m64111_201213_171552_33228719_ccs	1	505	433	Ser	GCT	0	0	-28.48
m64111_201213_171552_33489930_ccs	1	3200	3128	Ser	GCT	0	0	-25.38
m64111_201213_171552_33883403_ccs	1	4428	4500	Asn	GTT	0	0	-30.3
m64111_201213_171552_33884494_ccs	1	6095	6167	Glu	TTC	0	0	-29.01
m64111_201213_171552_35127469_ccs	1	661	591	Gly	ACC	0	0	-26.51
m64111_201213_171552_55181669_ccs	1	2898	2970	Asn	GTT	0	0	-29.16
m64111_201213_171552_35390463_ccs	1	1125	1197	Asn	GTT	0	0	-26.08
m64111_201213_171552_35455260_ccs	1	5	77	Arg	TCT	0	0	-29.87
m64111_201213_171552_35653326_ccs	1	5005	5076	Ala	TGC	0	0	-27.88
m64111_201213_171552_35717745_ccs	1	3421	3493	Lys	CTT	0	0	-31.04
m64111_201213_171552_36178261_ccs	1	3862	3790	Thr	TGT	0	0	-22.72
m64111_201213_171552_36439900_ccs	1	9657	9587	Ser	CGA	0	0	-30.1
m64111_201213_171552_36439900_ccs	2	9333	9261	Ser	GCT	0	0	-28.26
m64111_201213_171552_36571446_ccs	1	2304	2376	Asn	ATT	0	0	-26.14
m64111_201213_171552_36897191_ccs	1	4408	4480	Asn	GTT	0	0	-24.48
m64111_201213_171552_36897191_ccs	2	3469	3398	Lys	CTT	0	0	-30.13
m64111_201213_171552_36897191_ccs	3	897	825	Gly	TCC	0	0	-28.96
m64111_201213_171552_37355919_ccs000	1	464	536	Arg	CCT	0	0	-28.75
m64111_201213_171552_89000503_ccs00	1	161	233	Ser	GCT	0	0	-25.04
m64111_201213_171552_89000503_ccs0101	1	51	123	Ser	GCT	0	0	-25.04
m64111_201213_171552_37947920_ccs	1	3331	3401	Ser	ACT	0	0	-23.89
m64111_201213_171552_38143334_ccs	1	199	127	Ile	GAT	0	0	-23.45
m64111_201213_171552_38208790_ccs	1	83	11	Asn	GTT	0	0	-21.41
m64111_201213_171552_38274657_ccs	1	2366	2438	Gly	TCC	0	0	-30.06
m64111_201213_171552_38274657_ccs	2	5613	5541	Ser	GCT	0	0	-28.26
m64111_201213_171552_38734615_ccs	1	6640	6716	Asn	GTT	0	0	-28.26
m64111_201213_171552_55509912_ccs	1	2018	2090	Lys	CTT	0	0	-22.87
m64111_201213_171552_55705683_ccs	1	2747	2819	Ser	GCT	0	0	-22.86
m64111_201213_171552_39192062_ccs	1	598	670	Gly	CCC	0	0	-31.51
m64111_201213_171552_39454028_ccs	1	1712	1641	Trp	CCA	0	0	-25.1
m64111_201213_171552_40569661_ccs	1	1961	2032	Gly	GCC	0	0	-31.36
m64111_201213_171552_89261038_ccs	1	309	380	Cys	GCA	0	0	-29.18
m64111_201213_171552_89261038_ccs	2	785	857	Ser	ACT	0	0	-31.54
m64111_201213_171552_89261038_ccs	3	5356	5428	Ala	AGC	0	0	-29.94
m64111_201213_171552_4194917_ccs	1	3897	3825	Ser	ACT	0	0	-28.95
m64111_201213_171552_4197080_ccs	1	2142	2214	Gly	GCC	0	0	-30.81
m64111_201213_171552_4197080_ccs	2	2615	2687	Lys	CTT	0	0	-30.48
m64111_201213_171552_4260758_ccs	1	6241	6316	Gly	ACC	0	0	-28.89
m64111_201213_171552_4325510_ccs	1	2726	2654	Asn	GTT	0	0	-28.26
m64111_201213_171552_4325510_ccs	2	2486	2414	Asn	GTT	0	0	-28.26
m64111_201213_171552_41420506_ccs	1	2406	2480	Trp	AAA	0	0	-25.4
m64111_201213_171552_41813363_ccs	1	9628	9700	Lys	CTT	0	0	-29.21
m64111_201213_171552_42402118_ccs	1	146	74	Lys	CTT	0	0	-30.46
m64111_201213_171552_55839040_ccs	1	8456	8528	Lys	CTT	0	0	-25.56
m64111_201213_171552_42470021_ccs	1	3157	3086	Thr	AGT	0	0	-29.31
m64111_201213_171552_43649824_ccs	1	3262	3192	Ser	AGA	0	0	-25.63
m64111_201213_171552_43844229_ccs	1	2851	2780	Ala	AGC	0	0	-30.73
m64111_201213_171552_56167018_ccs0101	1	702	775	Tyr	GTA	0	0	-29.98
m64111_201213_171552_56426691_ccs	1	5273	5345	Lys	CTT	0	0	-25.91
m64111_201213_171552_76349955_ccs	1	2767	2839	Glu	CTC	0	0	-28.31
m64111_201213_171552_76417258_ccs	1	3960	4031	Asn	GTT	0	0	-22.18
m64111_201213_171552_57148793_ccs	1	3331	3255	Ala	AGC	0	0	-29.94
m64111_201213_171552_57739351_ccs	1	2809	2880	***	TTA	0	0	-31.67
m64111_201213_171552_57935547_ccs	1	3045	3117	Arg	TCT	0	0	-30.3
m64111_201213_171552_57935962_ccs	1	16220	16150	Gln	TTG	0	0	-29.06
m64111_201213_171552_58067221_ccs	1	853	781	Ser	GCT	0	0	-28.26
m64111_201213_171552_58459258_ccs	1	3602	3530	Ile	GAT	0	0	-28.26
m64111_201213_171552_59179265_ccs	1	2077	2149	Ser	GCT	0	0	-28.26
m64111_201213_171552_59179265_ccs	2	380	304	Lys	CTT	0	0	-31.03
m64111_201213_171552_59769920_ccs	1	5578	5506	Lys	CTT	0	0	-27.83
m64111_201213_171552_59834427_ccs	1	5082	5010	Lys	CTT	0	0	-22.87
m64111_201213_171552_59966993_ccs	1	12742	12814	Ser	GCT	0	0	-28.56
m64111_201213_171552_1180754_ccs	1	3026	3096	Leu	CAG	0	0	-27.52
m64111_201213_171552_3541251_ccs	1	2807	2735	Glu	CTC	0	0	-26.27
m64111_201213_171552_60425111_ccs0	1	5696	5625	Ala	TGC	0	0	-27.3
m64111_201213_171552_60425111_ccs0	2	2637	2565	Ser	GCT	0	0	-25.92
m64111_201213_171552_60754162_ccs	1	5520	5592	Lys	CTT	0	0	-30.48
m64111_201213_171552_61344120_ccs	1	2732	2660	Ser	GCT	0	0	-28.26
m64111_201213_171552_61670401_ccs	1	1428	1500	Ser	GCT	0	0	-30.1
m64111_201213_171552_61671240_ccs	1	290	362	Ser	GCT	0	0	-31.31
m64111_201213_171552_61800598_ccs	1	2665	2735	Gln	TTG	0	0	-29.06
m64111_201213_171552_61800598_ccs	2	5274	5204	Ser	TGA	0	0	-29.73
m64111_201213_171552_61802510_ccs	1	1694	1622	Leu	CAA	0	0	-29.13
m64111_201213_171552_61933957_ccs	1	6738	6665	Ile	AAT	0	0	-30.39
m64111_201213_171552_62128770_ccs	1	4688	4760	Glu	CTC	0	0	-29.73
m64111_201213_171552_62259579_ccs	1	5576	5648	Thr	AGT	0	0	-28.58
m64111_201213_171552_62652466_ccs	1	6208	6136	Val	CAC	0	0	-28.88
m64111_201213_171552_63177813_ccs	1	2372	2444	Ser	GCT	0	0	-29.69
m64111_201213_171552_63638285_ccs	1	225	297	Ser	GCT	0	0	-27.57
m64111_201213_171552_63964078_ccs	1	676	749	Cys	ACA	0	0	-28.27
m64111_201213_171552_63964078_ccs	2	6287	6359	Ser	GCT	0	0	-28.26
m64111_201213_171552_64095139_ccs	1	8660	8732	Lys	CTT	0	0	-26.78
m64111_201213_171552_1442509_ccs	1	1212	1284	Asp	ATC	0	0	-25.58
m64111_201213_171552_1443640_ccs	1	750	822	Asn	GTT	0	0	-28.68
m64111_201213_171552_64686828_ccs	1	2424	2352	Asn	GTT	0	0	-30.34
m64111_201213_171552_64751082_ccs	1	3814	3886	Asn	GTT	0	0	-28.26
m64111_201213_171552_64816472_ccs	1	1483	1553	Leu	CAA	0	0	-29.01
m64111_201213_171552_64816472_ccs	2	5873	5801	Ser	GCT	0	0	-28.26
m64111_201213_171552_65929273_ccs	1	3246	3174	Ser	ACT	0	0	-22.86
m64111_201213_171552_66062961_ccs0	1	1627	1556	Ser	GCT	0	0	-31.51
m64111_201213_171552_66062961_ccs01	1	1258	1187	Ser	GCT	0	0	-31.51
m64111_201213_171552_67306317_ccs	1	342	412	Ser	TGA	0	0	-29.73
m64111_201213_171552_67306317_ccs	2	3440	3510	Gln	TTG	0	0	-29.06
m64111_201213_171552_67897139_ccs	1	761	833	Lys	TTT	0	0	-29.72
m64111_201213_171552_5179888_ccs	1	3062	3134	Ser	GCT	0	0	-22.87
m64111_201213_171552_68354702_ccs	1	1365	1436	Arg	CCT	0	0	-26.11
m64111_201213_171552_69274357_ccs	1	5162	5090	Ser	GCT	0	0	-26.61
m64111_201213_171552_69338336_ccs	1	670	598	Ser	ACT	0	0	-24.69
m64111_201213_171552_69404554_ccs	1	189	116	Ser	GCT	0	0	-31.55
m64111_201213_171552_69469716_ccs	1	1148	1219	Glu	CTC	0	0	-28.43
m64111_201213_171552_69599233_ccs	1	1953	2022	Asn	GTT	0	0	-31.52
m64111_201213_171552_69599827_ccs	1	183	255	Lys	TTT	0	0	-24.91
m64111_201213_171552_69600719_ccs	1	3527	3455	Arg	TCT	0	0	-31.48
m64111_201213_171552_70124246_ccs	1	4981	4909	Ser	ACT	0	0	-30.35
m64111_201213_171552_70451899_ccs	1	1375	1447	Glu	TTC	0	0	-30.23
m64111_201213_171552_70713879_ccs	1	9231	9303	Ser	GCT	0	0	-28.26
m64111_201213_171552_70845348_ccs	1	551	480	Ala	AGC	0	0	-29.67
m64111_201213_171552_70976977_ccs	1	4814	4886	Asn	GTT	0	0	-30.57
m64111_201213_171552_70976977_ccs	2	12168	12241	Gly	GCC	0	0	-29.95
m64111_201213_171552_70976977_ccs	3	13483	13555	Ser	GCT	0	0	-28.26
m64111_201213_171552_70976977_ccs	4	9045	8973	Arg	GCG	0	0	-29.47
m64111_201213_171552_71239517_ccs	1	2929	2857	Asn	GTT	0	0	-26.65
m64111_201213_171552_71303182_ccs	1	1448	1520	Asn	GTT	0	0	-31.38
m64111_201213_171552_71762551_ccs	1	7453	7525	Ser	GCT	0	0	-24.51
m64111_201213_171552_1903349_ccs	1	1764	1692	Ser	GCT	0	0	-27.8
m64111_201213_171552_5440265_ccs	1	1977	2049	Lys	CTT	0	0	-23.9
m64111_201213_171552_72223146_ccs	1	4656	4728	Ser	GCT	0	0	-28.48
m64111_201213_171552_72812678_ccs	1	1193	1111	Lys	CTT	0	0	-24.87
m64111_201213_171552_72878514_ccs	1	112	40	Gly	TCC	0	0	-31.74
m64111_201213_171552_73073547_ccs	1	2649	2722	Ser	GCT	0	0	-31.55
m64111_201213_171552_73073547_ccs	2	3314	3386	Gln	CTG	0	0	-30.3
m64111_201213_171552_73075078_ccs	1	3711	3782	Val	AAC	0	0	-27.88
m64111_201213_171552_73335235_ccs	1	781	853	Lys	CTT	0	0	-28.26
m64111_201213_171552_73401848_ccs	1	11650	11578	Asn	ATT	0	0	-31.48
m64111_201213_171552_73598933_ccs	1	5826	5898	Ala	AGC	0	0	-30.88
m64111_201213_171552_74122544_ccs	1	519	590	Thr	TGT	0	0	-18.13
m64111_201213_171552_74317853_ccs	1	265	335	Ser	TGA	0	0	-29.73
m64111_201213_171552_74317853_ccs	2	3365	3435	Gln	TTG	0	0	-29.06
m64111_201213_171552_74645821_ccs	1	3572	3500	Ser	GCT	0	0	-31.14
m64111_201213_171552_74645821_ccs	2	2108	2036	Asn	GTT	0	0	-28.26
m64111_201213_171552_74648052_ccs01	1	1086	1014	Ser	GCT	0	0	-28.26
m64111_201213_171552_74776973_ccs	1	8921	8993	Ile	GAT	0	0	-25.89
m64111_201213_171552_74776973_ccs	2	6772	6700	Ala	AGC	0	0	-28.61
m64111_201213_171552_75104437_ccs	1	4939	4868	Lys	TTT	0	0	-24.05
m64111_201213_171552_2425488_ccs	1	4433	4503	Asn	GTT	0	0	-28.26
m64111_201213_171552_6032068_ccs	1	999	1072	Cys	GCA	0	0	-28.91
m64111_201213_171552_6555511_ccs	1	2292	2362	Gln	TTG	0	0	-29.06
m64111_201213_171552_7013948_ccs	1	5589	5519	Gln	TTG	0	0	-29.06
m64111_201213_171552_7209333_ccs	1	250	178	Ser	GCT	0	0	-29.41
m64111_201213_171552_7405647_ccs	1	5035	5107	Ser	GCT	0	0	-28.26
m64111_201213_171552_7405647_ccs	2	5471	5399	Ser	GCT	0	0	-27.57
m64111_201213_171552_7405647_ccs	3	2317	2245	Gly	TCC	0	0	-29.38
m64111_201213_171552_7538349_ccs	1	4299	4371	Cys	GCA	0	0	-30.37
m64111_201213_171552_76677626_ccs	1	433	505	Asn	GTT	0	0	-25.26
m64111_201213_171552_3737960_ccs0	1	45	116	Gly	CCC	0	0	-30.48
m64111_201213_171552_3737960_ccs01	1	512	583	Gly	CCC	0	0	-25.59
m64111_201213_171552_89391853_ccs	1	2518	2590	Ala	TGC	0	0	-28.26
m64111_201213_171552_89588737_ccs	1	597	669	Ser	GCT	0	0	-25
m64111_201213_171552_89588768_ccs	1	467	394	Asn	GTT	0	0	-31.09
m64111_201213_171552_90046706_ccs	1	2849	2924	Ala	TGC	0	0	-27.39
m64111_201213_171552_91228083_ccs	1	1022	1094	Lys	CTT	0	0	-31.53
m64111_201213_171552_91555865_ccs	1	4581	4509	Ser	GCT	0	0	-28.26
m64111_201213_171552_91620302_ccs	1	4402	4474	Asn	GTT	0	0	-26.65
m64111_201213_171552_91817043_ccs	1	1689	1617	Ser	ACT	0	0	-27.1
m64111_201213_171552_91881833_ccs	1	1216	1286	Gln	TTG	0	0	-29.06
m64111_201213_171552_91947721_ccs	1	4990	5063	Ser	GCT	0	0	-28.26
m64111_201213_171552_77005909_ccs	1	1774	1844	Gln	TTG	0	0	-29.06
m64111_201213_171552_77137360_ccs0	1	107	178	Cys	GCA	0	0	-14.51
m64111_201213_171552_77137360_ccs0	2	3324	3253	Glu	TTC	0	0	-22.3
m64111_201213_171552_77333175_ccs	1	7198	7126	Asn	ATT	0	0	-26.65
m64111_201213_171552_77334561_ccs	1	693	765	Lys	CTT	0	0	-26.87
m64111_201213_171552_77334561_ccs	2	762	834	Lys	CTT	0	0	-30.43
m64111_201213_171552_77334561_ccs	3	831	903	Lys	CTT	0	0	-30.43
m64111_201213_171552_77334561_ccs	4	5027	4956	Gly	TCC	0	0	-23.44
m64111_201213_171552_44106032_ccs	1	4442	4514	Ile	GAT	0	0	-26.87
m64111_201213_171552_92275495_ccs	1	4945	4873	Ser	GCT	0	0	-29.71
m64111_201213_171552_92996805_ccs	1	3273	3345	Ile	GAT	0	0	-28.34
m64111_201213_171552_92996805_ccs	2	3882	3953	His	GTG	0	0	-31.24
m64111_201213_171552_93063858_ccs	1	3237	3309	Ser	GCT	0	0	-27.2
m64111_201213_171552_93847574_ccs	1	9302	9230	Ser	GCT	0	0	-25.39
m64111_201213_171552_94177329_ccs	1	2878	2950	Ser	GCT	0	0	-27.77
m64111_201213_171552_94372653_ccs	1	2036	2108	Ser	GCT	0	0	-28.31
m64111_201213_171552_94702330_ccs	1	1712	1784	Thr	TGT	0	0	-29.27
m64111_201213_171552_94833083_ccs	1	5959	5889	Ser	TGA	0	0	-29.73
m64111_201213_171552_94896244_ccs	1	2902	2832	Ala	TGC	0	0	-24.42
m64111_201213_171552_95095364_ccs	1	2270	2342	Ser	GCT	0	0	-28.26
m64111_201213_171552_95158938_ccs	1	3083	3014	Thr	AGT	0	0	-22.99
m64111_201213_171552_95225003_ccs	1	2231	2160	Ala	AGC	0	0	-30.22
m64111_201213_171552_95423171_ccs	1	4209	4137	Ser	GCT	0	0	-22.18
m64111_201213_171552_95551893_ccs	1	3825	3753	Ser	GCT	0	0	-25.04
m64111_201213_171552_95944719_ccs	1	370	298	Ser	GCT	0	0	-28.26
m64111_201213_171552_95945753_ccs	1	3362	3434	Ser	GCT	0	0	-22.12
m64111_201213_171552_77662680_ccs	1	1328	1256	Asn	GTT	0	0	-31.03
m64111_201213_171552_44302454_ccs	1	6174	6245	Pro	TGG	0	0	-25.43
m64111_201213_171552_44302454_ccs	2	13452	13380	Ser	GCT	0	0	-30.93
m64111_201213_171552_44368162_ccs	1	11363	11291	Ser	GCT	0	0	-30.33
m64111_201213_171552_96469674_ccs	1	5475	5403	Ser	GCT	0	0	-30.68
m64111_201213_171552_97452483_ccs	1	8516	8444	Ser	GCT	0	0	-28.26
m64111_201213_171552_97648988_ccs	1	2605	2677	Arg	TCT	0	0	-28.26
m64111_201213_171552_97716714_ccs	1	376	449	His	GTG	0	0	-27.62
m64111_201213_171552_98110261_ccs	1	1385	1457	Ser	GCT	0	0	-30.48
m64111_201213_171552_98830926_ccs	1	6658	6586	Ser	GCT	0	0	-24.48
m64111_201213_171552_98894347_ccs	1	760	832	Ser	ACT	0	0	-25.73
m64111_201213_171552_98960085_ccs	1	1394	1466	Val	GAC	0	0	-25.7
m64111_201213_171552_99484490_ccs	1	4526	4598	Lys	CTT	0	0	-30.67
m64111_201213_171552_99682142_ccs	1	5343	5415	Ser	ACT	0	0	-31.56
m64111_201213_171552_99812149_ccs	1	5907	5836	Ser	GCT	0	0	-30.42
m64111_201213_171552_99813028_ccs	1	2632	2560	Ser	GCT	0	0	-28.26
m64111_201213_171552_100403452_ccs0	1	1002	930	Thr	TGT	0	0	-28.26
m64111_201213_171552_101057168_ccs	1	4666	4736	Val	AAC	0	0	-28.57
m64111_201213_171552_101057168_ccs	2	8848	8776	Ser	GCT	0	0	-26.88
m64111_201213_171552_102171488_ccs	1	764	692	Ser	GCT	0	0	-24.57
m64111_201213_171552_102237989_ccs	1	1075	1145	Gln	TTG	0	0	-29.06
m64111_201213_171552_102891863_ccs	1	311	242	Ile	AAT	0	0	-31.07
m64111_201213_171552_103089191_ccs	1	5458	5530	Arg	CCT	0	0	-23.56
m64111_201213_171552_103286761_ccs	1	513	442	Thr	TGT	0	0	-28.59
m64111_201213_171552_103416305_ccs	1	5878	5806	Ser	GCT	0	0	-28.09
m64111_201213_171552_78448613_ccs	1	1359	1431	Ser	GCT	0	0	-30.48
m64111_201213_171552_78513747_ccs	1	1939	2011	Arg	CCT	0	0	-25.77
m64111_201213_171552_78644147_ccs	1	2905	2835	Ser	GCT	0	0	-26.34
m64111_201213_171552_44960593_ccs	1	3732	3804	Glu	TTC	0	0	-30.52
m64111_201213_171552_104007525_ccs	1	314	242	Ser	GCT	0	0	-28.26
m64111_201213_171552_104073037_ccs	1	386	459	Cys	ACA	0	0	-31.7
m64111_201213_171552_104268691_ccs	1	3877	3949	Ser	GCT	0	0	-28.26
m64111_201213_171552_104268787_ccs	1	2045	1974	Pro	AGG	0	0	-23.31
m64111_201213_171552_104464980_ccs	1	3318	3390	Ser	GCT	0	0	-28.26
m64111_201213_171552_104464980_ccs	2	4340	4422	Leu	CAG	0	0	-24.4
m64111_201213_171552_104532281_ccs	1	5443	5373	Gln	TTG	0	0	-29.06
m64111_201213_171552_104858383_ccs	1	8705	8777	Ser	GCT	0	0	-30.7
m64111_201213_171552_104858383_ccs	2	6004	5931	Trp	CCA	0	0	-30.88
m64111_201213_171552_104925527_ccs	1	2574	2501	Arg	TCT	0	0	-27.77
m64111_201213_171552_105122156_ccs	1	6874	6805	Val	AAC	0	0	-24.68
m64111_201213_171552_105644952_ccs	1	5290	5361	Thr	AGT	0	0	-31.42
m64111_201213_171552_105645812_ccs	1	3898	3827	Ala	AGC	0	0	-30.12
m64111_201213_171552_105906571_ccs	1	4048	3978	Ala	AGC	0	0	-28.25
m64111_201213_171552_105906571_ccs	2	3354	3282	Ser	GCT	0	0	-28.99
m64111_201213_171552_106561627_ccs	1	2766	2839	Thr	GGT	0	0	-29.01
m64111_201213_171552_106561627_ccs	2	3119	3189	Ala	TGC	0	0	-24.68
m64111_201213_171552_106693054_ccs	1	1383	1311	Asn	ATT	0	0	-28.26

## Sheet: S7
Table S7: Day 0 ORI. Full details of BLAST analysis to identify origins of replication.
Query Sequence	sseqid	pident	length	mismatch	gapopen	qstart	qend	sstart	send	evalue	bitscore
m64111_201213_171552_6490727_ccs01	NC_053438.1	100	278	0	0	274	551	39838994	39838717	4.15e-144	514
m64111_201213_171552_18155250_ccs0	NC_053446.1	100	178	0	0	393	570	56379130	56378953	1.67e-88	329
m64111_201213_171552_123994289_ccs	NC_053438.1	99.8	501	0	1	70	570	39838444	39838943	0	918
m64111_201213_171552_111413658_ccs	NC_053438.1	99.76	416	0	1	155	570	39838444	39838858	0	761
m64111_201213_171552_18155250_ccs0	NC_053438.1	99.745	392	1	0	1	392	39838603	39838994	0	719
m64111_201213_171552_74318808_ccs0	NC_053438.1	99.696	329	1	0	1	329	39838666	39838994	8.92e-171	603
m64111_201213_171552_164495440_ccs	NC_053438.1	99.663	297	0	1	255	551	39838444	39838739	1.9e-152	542
m64111_201213_171552_6490727_ccs01	NC_053438.1	99.634	273	0	1	1	273	39838715	39838444	4.18e-139	497
m64111_201213_171552_164495440_ccs	NC_053438.1	99.606	254	1	0	1	254	39838741	39838994	4.24e-129	464
m64111_201213_171552_74318808_ccs0	NC_053438.1	99.585	241	0	1	330	570	39838444	39838683	2.66e-121	438
m64111_201213_171552_6490727_ccs0	NC_053438.1	99.472	379	0	2	1	379	39838820	39838444	0	688
m64111_201213_171552_18155250_ccs0	NC_053438.1	99.438	178	0	1	393	570	39838444	39838620	2.8e-86	322
m64111_201213_171552_111413658_ccs	NC_053438.1	99.351	154	1	0	1	154	39838841	39838994	1.71e-73	279
m64111_201213_171552_74318808_ccs0	NC_053446.1	99.17	241	2	0	330	570	56379130	56378890	3.44e-120	435
m64111_201213_171552_6490727_ccs0	NC_053438.1	98.953	191	0	1	380	570	39838994	39838806	7.72e-92	340
m64111_201213_171552_6490727_ccs0	NC_053446.1	98.897	272	3	0	108	379	45185790	45186061	9.37e-136	486
m64111_201213_171552_6490727_ccs01	NC_053446.1	98.897	272	3	0	2	273	45185790	45186061	9.04e-136	486
m64111_201213_171552_111413658_ccs	NC_053446.1	98.897	272	3	0	155	426	45186061	45185790	9.37e-136	486
m64111_201213_171552_123994289_ccs	NC_053446.1	98.897	272	3	0	70	341	45186061	45185790	9.37e-136	486
m64111_201213_171552_164495440_ccs	NC_053446.1	98.897	272	3	0	255	526	45186061	45185790	9.04e-136	486
m64111_201213_171552_74318808_ccs0	NC_053446.1	98.755	241	3	0	330	570	45186061	45185821	1.6e-118	429
m64111_201213_171552_111413658_ccs	NC_053446.1	98.558	416	6	0	155	570	56379130	56378715	0	736
m64111_201213_171552_6490727_ccs01	NW_012160880.1	98.462	130	2	0	418	547	37388785	37388914	1.68e-58	230
m64111_201213_171552_6490727_ccs01	NC_026941.1	98.462	130	2	0	418	547	37388785	37388914	1.68e-58	230
m64111_201213_171552_111413658_ccs	NW_012160880.1	98.462	130	2	0	433	562	37388914	37388785	1.74e-58	230
m64111_201213_171552_111413658_ccs	NC_026941.1	98.462	130	2	0	433	562	37388914	37388785	1.74e-58	230
m64111_201213_171552_123994289_ccs	NW_012160880.1	98.462	130	2	0	348	477	37388914	37388785	1.74e-58	230
m64111_201213_171552_123994289_ccs	NC_026941.1	98.462	130	2	0	348	477	37388914	37388785	1.74e-58	230
m64111_201213_171552_18155250_ccs0	NW_012160880.1	98.462	130	2	0	119	248	37388914	37388785	1.74e-58	230
m64111_201213_171552_18155250_ccs0	NC_026941.1	98.462	130	2	0	119	248	37388914	37388785	1.74e-58	230
m64111_201213_171552_74318808_ccs0	NW_012160880.1	98.438	128	2	0	58	185	37388912	37388785	2.26e-57	226
m64111_201213_171552_74318808_ccs0	NC_026941.1	98.438	128	2	0	58	185	37388912	37388785	2.26e-57	226
m64111_201213_171552_123994289_ccs	NC_053446.1	98.406	502	7	1	70	570	56379130	56378629	0	881
m64111_201213_171552_74318808_ccs0	NC_053438.1	98.34	241	4	0	330	570	69356129	69355889	7.45e-117	424
m64111_201213_171552_164495440_ccs	NC_053446.1	98.316	297	5	0	255	551	56379130	56378834	2.48e-146	521
m64111_201213_171552_18155250_ccs0	NC_053446.1	98.315	178	3	0	393	570	45186061	45185884	1.68e-83	313
m64111_201213_171552_6490727_ccs01	NC_053446.1	98.208	279	4	1	274	551	56378578	56378856	9.04e-136	486
m64111_201213_171552_6490727_ccs01	NC_053438.1	98.168	273	5	0	1	273	69355857	69356129	5.44e-133	477
m64111_201213_171552_6490727_ccs01	NC_053446.1	98.168	273	5	0	1	273	56378858	56379130	5.44e-133	477
m64111_201213_171552_175965442_ccs	NC_000019.10	98.155	271	5	0	226	496	15786077	15785807	1.72e-130	473
m64111_201213_171552_6490727_ccs0	NC_053446.1	98.153	379	6	1	1	379	56378753	56379130	0	660
m64111_201213_171552_74318808_ccs0	NW_012160871.1	97.959	196	4	0	375	570	37644582	37644777	7.72e-92	340
m64111_201213_171552_74318808_ccs0	NC_026932.1	97.959	196	4	0	375	570	37644582	37644777	7.72e-92	340
m64111_201213_171552_6490727_ccs0	NC_053446.1	97.906	191	3	1	380	570	56378578	56378767	1.67e-88	329
m64111_201213_171552_6490727_ccs0	NC_053438.1	97.861	374	8	0	6	379	69355756	69356129	0	647
m64111_201213_171552_111413658_ccs	NC_053438.1	97.837	416	9	0	155	570	69356129	69355714	0	719
m64111_201213_171552_123994289_ccs	NC_053438.1	97.8	500	10	1	70	569	69356129	69355631	0	861
m64111_201213_171552_18155250_ccs0	NC_053438.1	97.753	178	4	0	393	570	69356129	69355952	7.83e-82	307
m64111_201213_171552_18155250_ccs0	NW_012160871.1	97.744	133	3	0	438	570	37644582	37644714	1.74e-58	230
m64111_201213_171552_18155250_ccs0	NC_026932.1	97.744	133	3	0	438	570	37644582	37644714	1.74e-58	230
m64111_201213_171552_164495440_ccs	NC_053446.1	97.647	255	5	1	1	254	56378832	56378578	9.24e-121	436
m64111_201213_171552_175965442_ccs	NC_000019.10	97.528	890	21	1	3	892	117398	118286	0	1520
m64111_201213_171552_175965442_ccs	NC_000019.10	97.351	755	19	1	828	1582	15714134	15713381	0	1282
m64111_201213_171552_164495440_ccs	NC_053438.1	97.306	297	8	0	255	551	69356129	69355833	2.5e-141	505
m64111_201213_171552_74318808_ccs0	NC_053446.1	97.273	330	8	1	1	329	56378907	56378578	1.96e-157	558
m64111_201213_171552_18155250_ccs0	NC_053446.1	97.201	393	10	1	1	392	56378970	56378578	0	664
m64111_201213_171552_18155250_ccs0	NW_012160871.1	97.143	245	5	1	1	245	48929474	48929232	1.61e-113	412
m64111_201213_171552_18155250_ccs0	NC_026932.1	97.143	245	5	1	1	245	48929474	48929232	1.61e-113	412
m64111_201213_171552_123667135_ccs0	NC_060062.1	97.037	135	3	1	2	136	59508357	59508224	1.39e-57	226
m64111_201213_171552_74318808_ccs0	NW_012160871.1	97.009	234	7	0	337	570	48929627	48929394	5.84e-108	394
m64111_201213_171552_74318808_ccs0	NC_026932.1	97.009	234	7	0	337	570	48929627	48929394	5.84e-108	394
m64111_201213_171552_6490727_ccs01	NW_012160871.1	96.992	266	8	0	1	266	48929362	48929627	4.27e-124	448
m64111_201213_171552_6490727_ccs01	NC_026932.1	96.992	266	8	0	1	266	48929362	48929627	4.27e-124	448
m64111_201213_171552_111413658_ccs	NW_012160871.1	96.985	398	10	1	162	559	48929627	48929232	0	667
m64111_201213_171552_111413658_ccs	NC_026932.1	96.985	398	10	1	162	559	48929627	48929232	0	667
m64111_201213_171552_123994289_ccs	NW_012160871.1	96.985	398	10	1	77	474	48929627	48929232	0	667
m64111_201213_171552_123994289_ccs	NC_026932.1	96.985	398	10	1	77	474	48929627	48929232	0	667
m64111_201213_171552_6490727_ccs01	NW_012160871.1	96.947	131	2	1	421	551	48929232	48929360	3.64e-55	219
m64111_201213_171552_6490727_ccs01	NC_026932.1	96.947	131	2	1	421	551	48929232	48929360	3.64e-55	219
m64111_201213_171552_18155250_ccs0	NC_053438.1	96.939	392	11	1	1	392	69355969	69355579	0	656
m64111_201213_171552_6490727_ccs01	NW_012160871.1	96.93	228	7	0	1	228	37644809	37644582	1.22e-104	383
m64111_201213_171552_6490727_ccs01	NC_026932.1	96.93	228	7	0	1	228	37644809	37644582	1.22e-104	383
m64111_201213_171552_164495440_ccs	NC_053439.1	96.914	162	5	0	390	551	41480614	41480775	2.76e-71	272
m64111_201213_171552_164495440_ccs	NW_012160871.1	96.897	290	9	0	262	551	48929627	48929338	9.04e-136	486
m64111_201213_171552_164495440_ccs	NC_026932.1	96.897	290	9	0	262	551	48929627	48929338	9.04e-136	486
m64111_201213_171552_164495440_ccs	NC_053438.1	96.85	254	7	1	1	254	69355831	69355579	7.19e-117	424
m64111_201213_171552_6490727_ccs0	NW_012160871.1	96.774	372	9	2	1	372	48929259	48929627	3.19e-175	617
m64111_201213_171552_6490727_ccs0	NC_026932.1	96.774	372	9	2	1	372	48929259	48929627	3.19e-175	617
m64111_201213_171552_111413658_ccs	NC_053446.1	96.774	155	4	1	1	154	56378732	56378578	8e-67	257
m64111_201213_171552_6490727_ccs0	NC_053440.1	96.753	308	10	0	72	379	12395695	12395388	4.3e-144	514
m64111_201213_171552_111413658_ccs	NC_053440.1	96.753	308	10	0	155	462	12395388	12395695	4.3e-144	514
m64111_201213_171552_123994289_ccs	NC_053440.1	96.753	308	10	0	70	377	12395388	12395695	4.3e-144	514
m64111_201213_171552_6490727_ccs01	NC_053438.1	96.751	277	8	1	274	550	69355579	69355854	5.48e-128	460
m64111_201213_171552_175965442_ccs	NC_000019.10	96.735	1225	36	4	634	1858	15707370	15708590	0	2037
m64111_201213_171552_74318808_ccs0	NW_012160871.1	96.703	182	4	1	1	182	48929411	48929232	3.64e-80	302
m64111_201213_171552_74318808_ccs0	NC_026932.1	96.703	182	4	1	1	182	48929411	48929232	3.64e-80	302
m64111_201213_171552_74318808_ccs0	NC_053440.1	96.68	241	8	0	330	570	12395388	12395628	3.49e-110	401
m64111_201213_171552_164495440_ccs	NC_053440.1	96.633	297	10	0	255	551	12395388	12395684	5.4e-138	494
m64111_201213_171552_18155250_ccs0	NC_053440.1	96.629	178	6	0	393	570	12395388	12395565	1.7e-78	296
m64111_201213_171552_175965442_ccs	NC_000019.10	96.503	1058	31	5	892	1946	116489	115435	0	1744
m64111_201213_171552_111413658_ccs	NC_053446.1	96.5	200	7	0	371	570	49865767	49865966	4.65e-89	331
m64111_201213_171552_18155250_ccs0	NW_012160871.1	96.491	171	6	0	400	570	48929627	48929457	1.32e-74	283
m64111_201213_171552_18155250_ccs0	NC_026932.1	96.491	171	6	0	400	570	48929627	48929457	1.32e-74	283
m64111_201213_171552_164495440_ccs	NW_012160871.1	96.429	252	9	0	300	551	37644582	37644833	1.2e-114	416
m64111_201213_171552_164495440_ccs	NC_026932.1	96.429	252	9	0	300	551	37644582	37644833	1.2e-114	416
m64111_201213_171552_6490727_ccs01	NC_053439.1	96.377	138	5	0	1	138	41480751	41480614	6.05e-58	228
m64111_201213_171552_74318808_ccs0	NC_053438.1	96.353	329	11	1	1	329	69355906	69355579	7.09e-152	540
m64111_201213_171552_6490727_ccs01	NC_053440.1	96.337	273	10	0	1	273	12395660	12395388	1.19e-124	449
m64111_201213_171552_175965442_ccs	NC_000019.10	96.332	518	16	3	1424	1940	21661780	21661265	0	848
m64111_201213_171552_123667135_ccs0	NC_060062.1	96.296	135	4	1	2	136	59497204	59497071	6.45e-56	220
m64111_201213_171552_123667135_ccs0	NC_060062.1	96.296	135	4	1	2	136	59518096	59517963	6.45e-56	220
m64111_201213_171552_175965442_ccs	NC_000019.10	96.209	422	7	6	1527	1944	19836632	19836216	0	682
m64111_201213_171552_6490727_ccs0	NW_012160871.1	96.049	329	13	0	6	334	37644910	37644582	9.18e-151	536
m64111_201213_171552_6490727_ccs0	NC_026932.1	96.049	329	13	0	6	334	37644910	37644582	9.18e-151	536
m64111_201213_171552_6490727_ccs01	NC_053446.1	96.043	278	7	2	274	551	49866098	49865825	1.19e-124	449
m64111_201213_171552_175965442_ccs	NC_000019.10	95.995	749	28	2	3	751	9401862	9402608	0	1216
m64111_201213_171552_175965442_ccs	NC_000019.10	95.991	449	15	3	1500	1946	19564435	19563988	0	726
m64111_201213_171552_111413658_ccs	NW_012160871.1	95.957	371	15	0	200	570	37644582	37644952	8.92e-171	603
m64111_201213_171552_111413658_ccs	NC_026932.1	95.957	371	15	0	200	570	37644582	37644952	8.92e-171	603
m64111_201213_171552_18155250_ccs0	NC_053440.1	95.946	148	6	0	1	148	12395548	12395695	8.06e-62	241
m64111_201213_171552_111413658_ccs	NC_053440.1	95.89	146	4	1	9	154	31829849	31829992	3.75e-60	235
m64111_201213_171552_175965442_ccs	NC_000019.10	95.805	1168	44	3	3	1170	15694625	15693463	0	1881
m64111_201213_171552_175965442_ccs	NC_000019.10	95.668	1939	80	4	3	1940	8797780	8795845	0	3112
m64111_201213_171552_164495440_ccs	NC_053446.1	95.635	252	7	2	3	254	49865851	49866098	3.37e-110	401
m64111_201213_171552_175965442_ccs	NC_000019.10	95.614	342	14	1	503	844	8717243	8717583	9.98e-153	547
m64111_201213_171552_18155250_ccs0	NC_053446.1	95.536	336	11	2	57	392	49865767	49866098	3.3e-150	534
m64111_201213_171552_175965442_ccs	NC_000019.10	95.482	664	28	2	1281	1943	6952719	6952057	0	1059
m64111_201213_171552_111413658_ccs	NC_053438.1	95.455	154	6	1	1	154	69355731	69355579	6.23e-63	244
m64111_201213_171552_74318808_ccs0	NC_053446.1	95.441	329	11	2	1	329	49865774	49866098	2.57e-146	521
m64111_201213_171552_123994289_ccs	NC_053446.1	95.439	285	9	2	286	570	49865767	49866047	3.42e-125	451
m64111_201213_171552_74318808_ccs0	NC_053438.1	95.436	241	11	0	330	570	53895259	53895499	3.52e-105	385
m64111_201213_171552_6490727_ccs0	NC_053439.1	95.397	239	11	0	6	244	41480852	41480614	4.55e-104	381
m64111_201213_171552_123994289_ccs	NW_012160871.1	95.395	456	20	1	115	570	37644582	37645036	0	725
m64111_201213_171552_123994289_ccs	NC_026932.1	95.395	456	20	1	115	570	37644582	37645036	0	725
m64111_201213_171552_6490727_ccs0	NC_053438.1	95.288	191	6	1	380	570	69355579	69355766	1.31e-79	300
m64111_201213_171552_175965442_ccs	NC_000019.10	95.175	1948	83	11	3	1944	20894893	20892951	0	3066
m64111_201213_171552_175965442_ccs	NC_000019.10	95.062	1944	63	7	3	1944	12006723	12004811	0	3027
m64111_201213_171552_175965442_ccs	NC_000019.10	95.003	1941	71	8	3	1940	15597518	15599435	0	3024
m64111_201213_171552_175965442_ccs	NC_000019.10	94.959	1726	75	11	226	1944	15707370	15705650	0	2695
m64111_201213_171552_18155250_ccs0	NC_053438.1	94.944	178	9	0	393	570	53895259	53895436	1.71e-73	279
m64111_201213_171552_164495440_ccs	NC_053438.1	94.898	294	15	0	255	548	53895259	53895552	5.48e-128	460
m64111_201213_171552_6490727_ccs01	NC_053438.1	94.872	273	14	0	1	273	53895531	53895259	5.56e-118	427
m64111_201213_171552_175965442_ccs	NC_000019.10	94.854	1924	94	5	3	1924	20828735	20830655	0	3000
m64111_201213_171552_175965442_ccs	NC_000019.10	94.81	1580	69	10	369	1944	21681380	21682950	0	2451
m64111_201213_171552_6490727_ccs0	NC_053446.1	94.764	191	4	2	380	570	49866098	49865914	2.19e-77	292
m64111_201213_171552_111413658_ccs	NC_053439.1	94.662	281	15	0	290	570	41480614	41480894	9.57e-121	436
m64111_201213_171552_175965442_ccs	NC_000019.10	94.653	1945	100	4	3	1946	15491342	15489401	0	3013
m64111_201213_171552_175965442_ccs	NC_000019.10	94.613	724	38	1	1040	1763	144027	143305	0	1120
m64111_201213_171552_175965442_ccs	NC_000019.10	94.596	1832	85	5	107	1937	8911487	8913305	0	2822
m64111_201213_171552_6490727_ccs0	NC_053438.1	94.524	347	19	0	33	379	53895605	53895259	9.18e-151	536
m64111_201213_171552_111413658_ccs	NC_053438.1	94.524	347	19	0	155	501	53895259	53895605	9.18e-151	536
m64111_201213_171552_123994289_ccs	NC_053438.1	94.524	347	19	0	70	416	53895259	53895605	9.18e-151	536
m64111_201213_171552_175965442_ccs	NC_000019.10	94.444	486	25	2	1440	1924	12566421	12566905	0	747
m64111_201213_171552_175965442_ccs	NC_000019.10	94.41	322	18	0	1356	1677	14896681	14896360	3.66e-137	496
m64111_201213_171552_175965442_ccs	NC_000019.10	94.408	304	14	3	1645	1946	15714132	15714434	1.03e-127	464
m64111_201213_171552_175965442_ccs	NC_000019.10	94.405	1948	93	13	3	1944	20811898	20813835	0	2979
m64111_201213_171552_18155250_ccs0	NW_012160871.1	94.388	392	21	1	1	392	37644697	37645087	3.21e-170	601
m64111_201213_171552_18155250_ccs0	NC_026932.1	94.388	392	21	1	1	392	37644697	37645087	3.21e-170	601
m64111_201213_171552_122029155_ccs0	NC_000019.10	94.326	141	4	4	741	879	893452	893590	4.18e-53	213
m64111_201213_171552_175965442_ccs	NC_000019.10	94.243	1077	60	2	848	1924	8717240	8716166	0	1644
m64111_201213_171552_6490727_ccs01	NW_012160871.1	94.203	276	15	1	274	549	37645087	37644813	9.3e-116	420
m64111_201213_171552_6490727_ccs01	NC_026932.1	94.203	276	15	1	274	549	37645087	37644813	9.3e-116	420
m64111_201213_171552_111413658_ccs	NC_053446.1	94.156	154	5	2	1	154	49865949	49866098	4.85e-59	231
m64111_201213_171552_175965442_ccs	NC_000019.10	94.131	426	23	2	634	1059	15786077	15786500	0	647
m64111_201213_171552_175965442_ccs	NC_000019.10	94	800	43	5	1147	1943	15694719	15695516	0	1206
m64111_201213_171552_6490727_ccs0	NC_053439.1	93.923	181	11	0	23	203	38920916	38921096	7.94e-72	274
m64111_201213_171552_111413658_ccs	NC_053439.1	93.923	181	11	0	331	511	38921096	38920916	7.94e-72	274
m64111_201213_171552_123994289_ccs	NC_053439.1	93.923	181	11	0	246	426	38921096	38920916	7.94e-72	274
m64111_201213_171552_18155250_ccs0	NC_053438.1	93.82	178	11	0	393	570	57062558	57062735	3.7e-70	268
m64111_201213_171552_123994289_ccs	NC_053439.1	93.791	306	15	2	205	510	41480614	41480915	7.35e-127	457
m64111_201213_171552_74318808_ccs0	NC_053438.1	93.75	240	15	0	330	569	57062558	57062797	5.93e-98	361
m64111_201213_171552_175965442_ccs	NC_000019.10	93.711	1590	91	6	352	1940	21155608	21154027	0	2374
m64111_201213_171552_175965442_ccs	NC_000019.10	93.702	1953	105	13	3	1946	19919886	19917943	0	2909
m64111_201213_171552_164495440_ccs	NW_012160871.1	93.701	254	15	1	1	254	37644835	37645087	1.58e-103	379
m64111_201213_171552_164495440_ccs	NC_026932.1	93.701	254	15	1	1	254	37644835	37645087	1.58e-103	379
m64111_201213_171552_139592911_ccs	NC_000019.10	93.642	173	11	0	274	446	2068232	2068404	7.51e-67	259
m64111_201213_171552_66519217_ccs01	NC_000019.10	93.642	173	11	0	1103	1275	2068232	2068404	7.51e-67	259
m64111_201213_171552_14025634_ccs	NC_060062.1	93.514	370	23	1	1588	1957	59508488	59508120	1.2e-153	549
m64111_201213_171552_111413658_ccs	NW_012160871.1	93.506	154	9	1	1	154	37644935	37645087	6.27e-58	228
m64111_201213_171552_111413658_ccs	NC_026932.1	93.506	154	9	1	1	154	37644935	37645087	6.27e-58	228
m64111_201213_171552_175965442_ccs	NC_000019.10	93.505	1940	117	6	3	1940	20629714	20627782	0	2876
m64111_201213_171552_18155250_ccs0	NC_053439.1	93.443	183	11	1	15	197	38921097	38920916	1.03e-70	270
m64111_201213_171552_175965442_ccs	NC_000019.10	93.323	1947	118	8	3	1946	20845219	20847156	0	2865
m64111_201213_171552_175965442_ccs	NC_000019.10	93.323	1273	79	6	670	1939	15968548	15969817	0	1875
m64111_201213_171552_74318808_ccs0	NW_012160871.1	93.313	329	21	1	1	329	37644760	37645087	3.37e-135	484
m64111_201213_171552_74318808_ccs0	NC_026932.1	93.313	329	21	1	1	329	37644760	37645087	3.37e-135	484
m64111_201213_171552_6490727_ccs01	NC_053438.1	93.258	267	18	0	7	273	57062824	57062558	5.64e-108	394
m64111_201213_171552_110887243_ccs0	NC_000019.10	93.243	148	10	0	1404	1551	17091572	17091425	1.55e-54	219
m64111_201213_171552_110887243_ccs01	NC_000019.10	93.243	148	10	0	543	690	17091572	17091425	1.59e-54	219
m64111_201213_171552_14025634_ccs	NC_060062.1	93.243	370	24	1	1588	1957	59497335	59496967	5.58e-152	544
m64111_201213_171552_18155250_ccs0	NC_053439.1	93.238	281	15	2	1	281	41480639	41480915	5.8e-113	411
m64111_201213_171552_175965442_ccs	NC_000019.10	93.235	1020	63	5	906	1924	15805257	15804243	0	1496
m64111_201213_171552_175965442_ccs	NC_000019.10	93.182	176	12	0	1353	1528	6962278	6962103	5.23e-66	259
m64111_201213_171552_6490727_ccs0	NC_053440.1	93.158	190	9	1	380	569	31829992	31829807	2.21e-72	276
m64111_201213_171552_139592911_ccs	NC_000019.10	93.074	231	16	0	217	447	2274925	2274695	9.38e-91	339
m64111_201213_171552_66519217_ccs01	NC_000019.10	93.074	231	16	0	1046	1276	2274925	2274695	9.38e-91	339
m64111_201213_171552_74318808_ccs0	NC_053440.1	93.009	329	21	1	1	329	31829666	31829992	1.57e-133	479
m64111_201213_171552_14025634_ccs	NC_060062.1	92.973	370	25	1	1588	1957	59518227	59517859	2.6e-150	538
m64111_201213_171552_6490727_ccs0	NC_053438.1	92.935	368	26	0	12	379	57062925	57062558	9.18e-151	536
m64111_201213_171552_139592911_ccs	NC_000019.10	92.905	296	19	2	144	438	4289103	4289397	5.41e-118	429
m64111_201213_171552_164495440_ccs	NC_053440.1	92.857	252	16	1	3	254	31829743	31829992	4.42e-99	364
m64111_201213_171552_175965442_ccs	NC_000019.10	92.857	154	9	2	1785	1937	21427447	21427295	6.87e-55	222
m64111_201213_171552_66519217_ccs01	NC_000019.10	92.833	293	20	1	976	1267	4289105	4289397	2.52e-116	424
m64111_201213_171552_175965442_ccs	NC_000019.10	92.832	1967	109	9	3	1946	21991041	21989084	0	2822
m64111_201213_171552_6490727_ccs01	NC_053440.1	92.806	278	18	1	274	551	31829992	31829717	3.37e-110	401
m64111_201213_171552_82378951_ccs01	NC_000019.10	92.788	208	15	0	559	766	9540741	9540948	1.15e-79	302
m64111_201213_171552_139592911_ccs	NC_000019.10	92.788	208	15	0	145	352	21706647	21706854	1.23e-79	302
m64111_201213_171552_6490727_ccs01	NC_053438.1	92.754	276	15	3	274	549	57063104	57062834	5.64e-108	394
m64111_201213_171552_175965442_ccs	NC_000019.10	92.74	1157	76	5	787	1942	9402607	9403756	0	1664
m64111_201213_171552_139592911_ccs	NC_000019.10	92.718	206	15	0	242	447	10480334	10480539	1.59e-78	298
m64111_201213_171552_66519217_ccs01	NC_000019.10	92.718	206	15	0	1071	1276	10480334	10480539	1.59e-78	298
m64111_201213_171552_66519217_ccs01	NC_000019.10	92.718	206	15	0	976	1181	21706649	21706854	1.59e-78	298
m64111_201213_171552_123667135_ccs0	NC_060062.1	92.683	164	11	1	197	360	59497335	59497173	2.3e-60	235
m64111_201213_171552_123667135_ccs0	NC_060062.1	92.683	164	11	1	197	360	59508488	59508326	2.3e-60	235
m64111_201213_171552_6490727_ccs0	NW_012160871.1	92.67	191	11	1	380	570	37645087	37644900	2.86e-71	272
m64111_201213_171552_6490727_ccs0	NC_026932.1	92.67	191	11	1	380	570	37645087	37644900	2.86e-71	272
m64111_201213_171552_66519217_ccs01	NC_000019.10	92.667	300	21	1	977	1276	4382254	4382552	1.5e-118	431
m64111_201213_171552_175965442_ccs	NC_000019.10	92.632	570	38	3	1258	1826	22248430	22247864	0	817
m64111_201213_171552_110887243_ccs0	NC_000019.10	92.617	149	7	3	1396	1540	15496360	15496212	2.6e-52	211
m64111_201213_171552_110887243_ccs01	NC_000019.10	92.617	149	7	3	535	679	15496360	15496212	2.66e-52	211
m64111_201213_171552_18155250_ccs0	NC_053440.1	92.602	392	27	1	1	392	31829603	31829992	1.51e-158	562
m64111_201213_171552_111413658_ccs	NC_053438.1	92.548	416	31	0	155	570	57062558	57062973	4.15e-169	597
m64111_201213_171552_139592911_ccs	NC_000019.10	92.547	161	12	0	279	439	12743681	12743521	1.64e-58	231
m64111_201213_171552_66519217_ccs01	NC_000019.10	92.547	161	12	0	1108	1268	12743681	12743521	1.64e-58	231
m64111_201213_171552_164495440_ccs	NC_053438.1	92.52	254	14	3	1	254	57062856	57063104	2.06e-97	359
m64111_201213_171552_139592911_ccs	NC_000019.10	92.462	199	15	0	249	447	15385278	15385476	1.24e-74	285
m64111_201213_171552_66519217_ccs01	NC_000019.10	92.462	199	15	0	1078	1276	15385278	15385476	1.24e-74	285
m64111_201213_171552_139592911_ccs	NC_000019.10	92.44	291	22	0	151	441	12768964	12769254	4.21e-114	416
m64111_201213_171552_66519217_ccs01	NC_000019.10	92.44	291	22	0	980	1270	12768964	12769254	4.21e-114	416
m64111_201213_171552_139592911_ccs	NC_000019.10	92.434	304	21	2	145	447	4382250	4382552	4.18e-119	433
m64111_201213_171552_175965442_ccs	NC_000019.10	92.418	1952	135	11	3	1950	11909898	11911840	0	2772
m64111_201213_171552_123994289_ccs	NC_053438.1	92.415	501	34	2	70	570	57062558	57063054	0	712
m64111_201213_171552_139592911_ccs	NC_000019.10	92.409	303	23	0	145	447	3438430	3438732	4.18e-119	433
m64111_201213_171552_139592911_ccs	NC_000019.10	92.384	302	22	1	146	447	13369061	13368761	5.41e-118	429
m64111_201213_171552_66519217_ccs01	NC_000019.10	92.384	302	23	0	975	1276	13369062	13368761	1.5e-118	431
m64111_201213_171552_66519217_ccs01	NC_000019.10	92.384	302	22	1	976	1276	3438431	3438732	5.41e-118	429
m64111_201213_171552_6490727_ccs01	NC_053439.1	92.361	144	11	0	274	417	38920692	38920835	2.84e-51	206
m64111_201213_171552_164495440_ccs	NC_053439.1	92.361	144	11	0	111	254	38920835	38920692	2.84e-51	206
m64111_201213_171552_18155250_ccs0	NC_053439.1	92.361	144	11	0	249	392	38920835	38920692	2.94e-51	206
m64111_201213_171552_74318808_ccs0	NC_053439.1	92.361	144	11	0	186	329	38920835	38920692	2.94e-51	206
m64111_201213_171552_175965442_ccs	NC_000019.10	92.347	1947	135	10	3	1945	20494677	20496613	0	2758
m64111_201213_171552_82378951_ccs0	NC_000019.10	92.344	209	15	1	1021	1229	9540741	9540948	5.35e-78	296
m64111_201213_171552_146475751_ccs	NC_000019.10	92.344	209	15	1	1723	1930	10318648	10318440	8.55e-78	296
m64111_201213_171552_139592911_ccs	NC_000019.10	92.308	299	21	2	150	447	10973568	10973865	2.52e-116	424
m64111_201213_171552_139592911_ccs	NC_000019.10	92.265	181	14	0	267	447	5961346	5961166	2.7e-66	257
m64111_201213_171552_66519217_ccs01	NC_000019.10	92.265	181	14	0	1096	1276	5961346	5961166	2.7e-66	257
m64111_201213_171552_139592911_ccs	NC_000019.10	92.256	297	22	1	151	447	15396002	15395707	3.26e-115	420
m64111_201213_171552_164495440_ccs	NC_053438.1	92.256	297	23	0	255	551	57062558	57062854	2.59e-116	422
m64111_201213_171552_111413658_ccs	NC_053438.1	92.208	154	7	4	1	154	57062956	57063104	1.76e-53	213
m64111_201213_171552_74318808_ccs0	NC_053439.1	92.202	218	13	2	1	218	41480702	41480915	2.82e-81	305
m64111_201213_171552_175965442_ccs	NC_000019.10	92.135	356	22	6	1594	1944	19986795	19987149	1.02e-137	497
m64111_201213_171552_139592911_ccs	NC_000019.10	92.131	305	22	2	144	447	9525275	9524972	5.41e-118	429
m64111_201213_171552_139592911_ccs	NC_000019.10	92.118	203	13	3	246	447	1897386	1897586	4.46e-74	283
m64111_201213_171552_66519217_ccs01	NC_000019.10	92.118	203	13	3	1075	1276	1897386	1897586	4.46e-74	283
m64111_201213_171552_66519217_ccs01	NC_000019.10	92.105	304	22	2	975	1276	9525275	9524972	1.95e-117	427
m64111_201213_171552_139592911_ccs	NC_000019.10	92.075	265	21	0	177	441	818558	818822	2.57e-101	374
m64111_201213_171552_66519217_ccs01	NC_000019.10	92.075	265	21	0	1006	1270	818558	818822	2.57e-101	374
m64111_201213_171552_154993122_ccs	NC_000019.10	92.053	151	12	0	3461	3611	12745376	12745526	1.22e-52	213
m64111_201213_171552_154993122_ccs	NC_000019.10	92.053	151	10	2	3170	3319	12737515	12737664	4.37e-52	211
m64111_201213_171552_111413658_ccs	NC_060062.1	92.045	176	8	3	395	570	10505310	10505479	2.24e-62	243
m64111_201213_171552_175965442_ccs	NC_000019.10	92.027	740	40	5	7	732	19723017	19722283	0	1022
m64111_201213_171552_139592911_ccs	NC_000019.10	92.014	288	22	1	155	442	3685744	3685458	3.28e-110	403
m64111_201213_171552_66519217_ccs01	NC_000019.10	92.014	288	22	1	984	1271	3685744	3685458	3.28e-110	403
m64111_201213_171552_139592911_ccs	NC_000019.10	91.985	262	20	1	165	426	14862848	14862588	4.3e-99	366
m64111_201213_171552_66519217_ccs01	NC_000019.10	91.985	262	20	1	994	1255	14862848	14862588	4.3e-99	366
m64111_201213_171552_146475751_ccs	NC_000019.10	91.975	162	13	0	2288	2449	905695	905534	3.16e-57	228
m64111_201213_171552_139592911_ccs	NC_000019.10	91.973	299	23	1	149	447	1971767	1972064	1.17e-114	418
m64111_201213_171552_139592911_ccs	NC_000019.10	91.973	299	22	2	146	443	14133798	14134095	1.17e-114	418
m64111_201213_171552_66519217_ccs01	NC_000019.10	91.973	299	23	1	978	1276	1971767	1972064	1.17e-114	418
m64111_201213_171552_66519217_ccs01	NC_000019.10	91.973	299	23	1	975	1272	14133797	14134095	1.17e-114	418
m64111_201213_171552_139592911_ccs	NC_000019.10	91.96	199	16	0	242	440	5408525	5408723	5.77e-73	279
m64111_201213_171552_66519217_ccs01	NC_000019.10	91.96	199	16	0	1071	1269	5408525	5408723	5.77e-73	279
m64111_201213_171552_139592911_ccs	NC_000019.10	91.958	286	21	2	156	441	11967409	11967692	4.24e-109	399
m64111_201213_171552_139592911_ccs	NC_000019.10	91.958	286	22	1	157	441	18911556	18911841	4.24e-109	399
m64111_201213_171552_66519217_ccs01	NC_000019.10	91.958	286	21	2	985	1270	11967409	11967692	4.24e-109	399
m64111_201213_171552_66519217_ccs01	NC_000019.10	91.958	286	22	1	986	1270	18911556	18911841	4.24e-109	399
m64111_201213_171552_139592911_ccs	NC_000019.10	91.946	298	23	1	145	442	20309664	20309960	4.21e-114	416
m64111_201213_171552_139592911_ccs	NC_000019.10	91.919	297	23	1	145	441	3237336	3237041	1.52e-113	414
m64111_201213_171552_139592911_ccs	NC_000019.10	91.892	296	24	0	145	440	21331344	21331049	1.52e-113	414
m64111_201213_171552_139592911_ccs	NC_000019.10	91.892	296	23	1	145	439	20003216	20002921	5.45e-113	412
m64111_201213_171552_66519217_ccs01	NC_000019.10	91.892	296	24	0	976	1271	20309665	20309960	1.52e-113	414
m64111_201213_171552_175965442_ccs	NC_000019.10	91.892	222	14	4	1726	1944	15899525	15899305	1.84e-80	307
m64111_201213_171552_139592911_ccs	NC_000019.10	91.864	295	21	2	149	442	13075089	13074797	7.05e-112	409
m64111_201213_171552_66519217_ccs01	NC_000019.10	91.864	295	24	0	976	1270	3237335	3237041	5.45e-113	412
m64111_201213_171552_66519217_ccs01	NC_000019.10	91.864	295	21	2	978	1271	13075089	13074797	7.05e-112	409
m64111_201213_171552_139592911_ccs	NC_000019.10	91.837	294	23	1	147	440	1334639	1334347	7.05e-112	409
m64111_201213_171552_139592911_ccs	NC_000019.10	91.837	196	16	0	246	441	7794016	7794211	2.68e-71	274
m64111_201213_171552_66519217_ccs01	NC_000019.10	91.837	294	24	0	976	1269	21331342	21331049	1.96e-112	411
m64111_201213_171552_66519217_ccs01	NC_000019.10	91.837	294	23	1	976	1269	1334639	1334347	7.05e-112	409
m64111_201213_171552_66519217_ccs01	NC_000019.10	91.837	294	22	2	975	1268	2710371	2710080	7.05e-112	409
m64111_201213_171552_66519217_ccs01	NC_000019.10	91.837	294	23	1	976	1268	20003214	20002921	7.05e-112	409
m64111_201213_171552_66519217_ccs01	NC_000019.10	91.837	196	16	0	1075	1270	7794016	7794211	2.68e-71	274
m64111_201213_171552_139592911_ccs	NC_000019.10	91.809	293	22	2	147	439	2710370	2710080	2.54e-111	407
m64111_201213_171552_66519217_ccs01	NC_000019.10	91.803	305	23	2	972	1276	15396009	15395707	2.52e-116	424
m64111_201213_171552_66519217_ccs01	NC_000019.10	91.781	292	23	1	980	1271	18072965	18072675	9.12e-111	405
m64111_201213_171552_139592911_ccs	NC_000019.10	91.776	304	24	1	145	447	2157468	2157165	9.06e-116	422
m64111_201213_171552_139592911_ccs	NC_000019.10	91.776	304	24	1	145	447	13727223	13726920	9.06e-116	422
m64111_201213_171552_139592911_ccs	NC_000019.10	91.776	304	23	2	145	447	14363215	14362913	9.06e-116	422
m64111_201213_171552_66519217_ccs01	NC_000019.10	91.776	304	22	2	976	1276	5602503	5602200	3.26e-115	420
m64111_201213_171552_18155250_ccs0	NC_053438.1	91.774	389	27	3	4	392	57062721	57063104	9.18e-151	536
m64111_201213_171552_139592911_ccs	NC_000019.10	91.758	182	15	0	266	447	1243030	1242849	3.5e-65	254
m64111_201213_171552_66519217_ccs01	NC_000019.10	91.758	182	15	0	1095	1276	1243030	1242849	3.5e-65	254
m64111_201213_171552_6490727_ccs01	NC_060062.1	91.753	194	14	2	357	550	10505530	10505339	3.57e-70	268
m64111_201213_171552_139592911_ccs	NC_000019.10	91.749	303	25	0	145	447	12532560	12532258	9.06e-116	422
m64111_201213_171552_139592911_ccs	NC_000019.10	91.749	303	25	0	145	447	14543431	14543733	9.06e-116	422
m64111_201213_171552_139592911_ccs	NC_000019.10	91.749	303	24	1	145	447	22542358	22542659	3.26e-115	420
m64111_201213_171552_66519217_ccs01	NC_000019.10	91.749	303	23	2	976	1276	14363215	14362913	3.26e-115	420
m64111_201213_171552_66519217_ccs01	NC_000019.10	91.722	302	24	1	976	1276	2157466	2157165	1.17e-114	418
m64111_201213_171552_66519217_ccs01	NC_000019.10	91.722	302	24	1	976	1276	13727221	13726920	1.17e-114	418
m64111_201213_171552_57082442_ccs	V00711.1	91.72	157	12	1	43	199	484	639	7.44e-54	217
m64111_201213_171552_139592911_ccs	NC_000019.10	91.696	289	23	1	154	442	19671502	19671789	4.24e-109	399
m64111_201213_171552_66519217_ccs01	NC_000019.10	91.696	289	23	1	983	1271	19671502	19671789	4.24e-109	399
m64111_201213_171552_139592911_ccs	NC_000019.10	91.694	301	22	2	146	446	15225427	15225130	1.52e-113	414
m64111_201213_171552_66519217_ccs01	NC_000019.10	91.694	301	25	0	976	1276	12532558	12532258	1.17e-114	418
m64111_201213_171552_66519217_ccs01	NC_000019.10	91.694	301	25	0	976	1276	14543433	14543733	1.17e-114	418
m64111_201213_171552_66519217_ccs01	NC_000019.10	91.694	301	25	0	976	1276	22542359	22542659	1.17e-114	418
m64111_201213_171552_66519217_ccs01	NC_000019.10	91.694	301	24	1	976	1276	2259335	2259036	4.21e-114	416
m64111_201213_171552_66519217_ccs01	NC_000019.10	91.694	301	23	1	975	1275	15225428	15225130	4.21e-114	416
m64111_201213_171552_139592911_ccs	NC_000019.10	91.63	227	18	1	217	442	11061440	11061666	5.69e-83	313
m64111_201213_171552_66519217_ccs01	NC_000019.10	91.63	227	18	1	1046	1271	11061440	11061666	5.69e-83	313
m64111_201213_171552_139592911_ccs	NC_000019.10	91.62	179	15	0	172	350	17598484	17598662	1.63e-63	248
m64111_201213_171552_66519217_ccs01	NC_000019.10	91.62	179	15	0	1001	1179	17598484	17598662	1.63e-63	248
m64111_201213_171552_6490727_ccs01	NC_053439.1	91.617	167	10	2	385	551	41480915	41480753	6.05e-58	228
m64111_201213_171552_139592911_ccs	NC_000019.10	91.613	310	22	3	142	447	5602509	5602200	7e-117	425
m64111_201213_171552_61343260_ccs	NC_000019.10	91.593	226	16	3	1187	1409	13081895	13081670	1.69e-81	309
m64111_201213_171552_139592911_ccs	NC_000019.10	91.582	297	25	0	145	441	6197301	6197005	1.96e-112	411
m64111_201213_171552_139592911_ccs	NC_000019.10	91.582	297	25	0	145	441	20063882	20064178	1.96e-112	411
m64111_201213_171552_139592911_ccs	NC_000019.10	91.582	297	24	1	151	447	16539147	16539442	7.05e-112	409
m64111_201213_171552_139592911_ccs	NC_000019.10	91.582	297	22	1	151	447	3439690	3439983	2.54e-111	407
m64111_201213_171552_66519217_ccs01	NC_000019.10	91.582	297	24	1	980	1276	16539147	16539442	7.05e-112	409
m64111_201213_171552_66519217_ccs01	NC_000019.10	91.582	297	22	1	980	1276	3439690	3439983	2.54e-111	407
m64111_201213_171552_41353589_ccs	NC_000019.10	91.573	178	14	1	2023	2199	6854113	6853936	1.02e-61	244
m64111_201213_171552_139592911_ccs	NC_000019.10	91.554	296	23	2	152	447	1327157	1326864	2.54e-111	407
m64111_201213_171552_139592911_ccs	NC_000019.10	91.554	296	24	1	152	447	4463066	4462772	2.54e-111	407
m64111_201213_171552_139592911_ccs	NC_000019.10	91.554	296	24	1	152	447	20065920	20066214	2.54e-111	407
m64111_201213_171552_139592911_ccs	NC_000019.10	91.554	296	22	2	150	443	16481905	16482199	9.12e-111	405
m64111_201213_171552_66519217_ccs01	NC_000019.10	91.554	296	23	2	981	1276	1327157	1326864	2.54e-111	407
m64111_201213_171552_66519217_ccs01	NC_000019.10	91.554	296	24	1	981	1276	4463066	4462772	2.54e-111	407
m64111_201213_171552_66519217_ccs01	NC_000019.10	91.554	296	24	1	981	1276	20065920	20066214	2.54e-111	407
m64111_201213_171552_139592911_ccs	NC_000019.10	91.538	260	21	1	189	447	18235979	18236238	2.59e-96	357
m64111_201213_171552_66519217_ccs01	NC_000019.10	91.538	260	21	1	1018	1276	18235979	18236238	2.59e-96	357
m64111_201213_171552_139592911_ccs	NC_000019.10	91.534	189	16	0	254	442	20031858	20031670	2.09e-67	261
m64111_201213_171552_66519217_ccs01	NC_000019.10	91.534	189	16	0	1083	1271	20031858	20031670	2.09e-67	261
m64111_201213_171552_139592911_ccs	NC_000019.10	91.532	248	21	0	200	447	20201975	20202222	7.25e-92	342
m64111_201213_171552_66519217_ccs01	NC_000019.10	91.532	248	21	0	1029	1276	20201975	20202222	7.25e-92	342
m64111_201213_171552_66519217_ccs01	NC_000019.10	91.525	295	25	0	976	1270	6197299	6197005	2.54e-111	407
m64111_201213_171552_66519217_ccs01	NC_000019.10	91.525	295	25	0	976	1270	20063884	20064178	2.54e-111	407
m64111_201213_171552_139592911_ccs	NC_000019.10	91.503	306	25	1	142	447	21005407	21005103	3.26e-115	420
m64111_201213_171552_139592911_ccs	NC_000019.10	91.497	294	23	2	155	447	10571680	10571388	3.28e-110	403
m64111_201213_171552_66519217_ccs01	NC_000019.10	91.497	294	23	2	984	1276	10571680	10571388	3.28e-110	403
m64111_201213_171552_74318808_ccs0	NC_053438.1	91.489	329	23	3	1	329	57062781	57063104	4.42e-124	448
m64111_201213_171552_139592911_ccs	NC_000019.10	91.477	176	13	2	274	448	4401580	4401406	2.72e-61	241
m64111_201213_171552_66519217_ccs01	NC_000019.10	91.477	176	13	2	1103	1277	4401580	4401406	2.72e-61	241
m64111_201213_171552_139592911_ccs	NC_000019.10	91.475	305	25	1	144	447	2259340	2259036	1.17e-114	418
m64111_201213_171552_175965442_ccs	NC_000019.10	91.47	891	65	4	1049	1938	15785806	15784926	0	1214
m64111_201213_171552_123667135_ccs0	NC_060062.1	91.463	164	13	1	197	360	59518227	59518065	4.98e-57	224
m64111_201213_171552_175965442_ccs	NC_000019.10	91.463	1394	104	12	550	1942	11939615	11938236	0	1901
m64111_201213_171552_175965442_ccs	NC_000019.10	91.463	164	7	2	1440	1596	15030188	15030025	8.88e-54	219
m64111_201213_171552_111413658_ccs	NC_053439.1	91.447	152	11	2	5	154	38920843	38920692	8.17e-52	207
m64111_201213_171552_139592911_ccs	NC_000019.10	91.438	292	23	2	157	447	4125098	4125388	4.24e-109	399
m64111_201213_171552_139592911_ccs	NC_000019.10	91.438	292	23	2	151	442	14064164	14064453	4.24e-109	399
m64111_201213_171552_66519217_ccs01	NC_000019.10	91.438	292	23	2	986	1276	4125098	4125388	4.24e-109	399
m64111_201213_171552_66519217_ccs01	NC_000019.10	91.438	292	23	2	980	1271	14064164	14064453	4.24e-109	399
m64111_201213_171552_175965442_ccs	NC_000019.10	91.429	245	13	7	1704	1944	9136752	9136992	3.93e-87	329
m64111_201213_171552_175965442_ccs	NC_000019.10	91.42	1923	150	8	3	1924	16965569	16967477	0	2623
m64111_201213_171552_139592911_ccs	NC_000019.10	91.419	303	26	0	145	447	3994870	3994568	4.21e-114	416
m64111_201213_171552_139592911_ccs	NC_000019.10	91.409	291	24	1	152	442	5767334	5767045	1.53e-108	398
m64111_201213_171552_66519217_ccs01	NC_000019.10	91.409	291	24	1	981	1271	5767334	5767045	1.53e-108	398
m64111_201213_171552_146475751_ccs	NC_000019.10	91.403	221	18	1	1721	1941	12369346	12369565	1.84e-79	302
m64111_201213_171552_139592911_ccs	NC_000019.10	91.391	302	25	1	146	447	14945437	14945737	5.45e-113	412
m64111_201213_171552_66519217_ccs01	NC_000019.10	91.391	302	26	0	975	1276	14945436	14945737	1.52e-113	414
m64111_201213_171552_139592911_ccs	NC_000019.10	91.379	290	24	1	158	447	4789685	4789973	5.49e-108	396
m64111_201213_171552_66519217_ccs01	NC_000019.10	91.379	290	24	1	987	1276	4789685	4789973	5.49e-108	396
m64111_201213_171552_66519217_ccs01	NC_000019.10	91.362	301	26	0	976	1276	3994868	3994568	5.45e-113	412
m64111_201213_171552_175965442_ccs	NC_000019.10	91.348	1202	103	1	564	1765	22663311	22662111	0	1642
m64111_201213_171552_139592911_ccs	NC_000019.10	91.333	300	24	1	145	442	18072974	18072675	7.05e-112	409
m64111_201213_171552_139592911_ccs	NC_000019.10	91.333	300	24	2	144	442	18139811	18140109	7.05e-112	409
m64111_201213_171552_139592911_ccs	NC_000019.10	91.321	265	20	2	172	433	4514726	4514462	7.2e-97	359
m64111_201213_171552_66519217_ccs01	NC_000019.10	91.321	265	20	2	1001	1262	4514726	4514462	7.2e-97	359
m64111_201213_171552_66519217_ccs01	NC_000019.10	91.318	311	25	2	967	1276	10973556	10973865	2.52e-116	424
m64111_201213_171552_139592911_ccs	NC_000019.10	91.289	287	24	1	157	443	537358	537643	2.55e-106	390
m64111_201213_171552_66519217_ccs01	NC_000019.10	91.289	287	24	1	986	1272	537358	537643	2.55e-106	390
m64111_201213_171552_146475751_ccs	NC_000019.10	91.289	287	22	3	1723	2008	13192200	13191916	1.37e-105	388
m64111_201213_171552_139592911_ccs	NC_000019.10	91.275	298	25	1	148	445	2597917	2597621	9.12e-111	405
m64111_201213_171552_139592911_ccs	NC_000019.10	91.275	298	25	1	145	442	8042299	8042003	9.12e-111	405
m64111_201213_171552_139592911_ccs	NC_000019.10	91.275	298	25	1	150	447	11932636	11932932	9.12e-111	405
m64111_201213_171552_139592911_ccs	NC_000019.10	91.275	298	24	2	145	441	12249530	12249234	9.12e-111	405
m64111_201213_171552_139592911_ccs	NC_000019.10	91.275	298	24	2	145	441	17669939	17670235	9.12e-111	405
m64111_201213_171552_139592911_ccs	NC_000019.10	91.275	298	25	1	150	447	20647485	20647781	9.12e-111	405
m64111_201213_171552_66519217_ccs01	NC_000019.10	91.275	298	25	1	977	1274	2597917	2597621	9.12e-111	405
m64111_201213_171552_66519217_ccs01	NC_000019.10	91.275	298	25	1	979	1276	11932636	11932932	9.12e-111	405
m64111_201213_171552_66519217_ccs01	NC_000019.10	91.275	298	25	1	979	1276	20647485	20647781	9.12e-111	405
m64111_201213_171552_139592911_ccs	NC_000019.10	91.259	286	24	1	153	438	5853279	5853563	9.18e-106	388
m64111_201213_171552_66519217_ccs01	NC_000019.10	91.259	286	24	1	982	1267	5853279	5853563	9.18e-106	388
m64111_201213_171552_175965442_ccs	NC_000019.10	91.25	160	12	2	1789	1946	15063215	15063056	3.2e-53	217
m64111_201213_171552_139592911_ccs	NC_000019.10	91.246	297	24	2	152	447	16476078	16476373	3.28e-110	403
m64111_201213_171552_66519217_ccs01	NC_000019.10	91.246	297	25	1	976	1271	8042299	8042003	3.28e-110	403
m64111_201213_171552_66519217_ccs01	NC_000019.10	91.246	297	24	2	976	1270	12249530	12249234	3.28e-110	403
m64111_201213_171552_66519217_ccs01	NC_000019.10	91.246	297	24	2	981	1276	16476078	16476373	3.28e-110	403
m64111_201213_171552_66519217_ccs01	NC_000019.10	91.246	297	24	2	976	1270	17669939	17670235	3.28e-110	403
m64111_201213_171552_66519217_ccs01	NC_000019.10	91.246	297	25	1	976	1271	18139813	18140109	3.28e-110	403
[truncated: 32,962 more rows]

## Sheet: S8
Table S8: Control Day 12 ORI. Full details of BLAST analysis to identify origins of replication.
[truncated: 449 more rows]

[truncated: 4 more sheets: S9, S10, S11, S12]
